# Supplementary material for: Phosphodiesterase 4D contributes to angiotensin II-induced abdominal aortic aneurysm through smooth muscle cell apoptosis
Source: PubMed Central journal article supplement (PMC9440214; doi:10.1038/s12276-022-00815-y), 2022-08-23
Supplement: 12276_2022_815_MOESM1_ESM.pdf [file 12276_2022_815_MOESM1_ESM.pdf]

## Supplementary Information

### Phosphodiesterase 4D contributes to angiotensin II-induced abdominal aortic aneurysm through smooth muscle cell apoptosis

Running title: PDE4D aggravates abdominal aortic aneurysm

Ran Gao<sup>1,\*</sup>, Wenjun Guo<sup>1,\*</sup>, Tianfei Fan<sup>1,\*</sup>, Junling Pang<sup>1</sup>, Yangfeng Hou<sup>1</sup>, Xiaohang Feng<sup>1</sup>, Bolun Li<sup>1</sup>, Weipeng Ge<sup>1</sup>, Tianhui Fan<sup>1</sup>, Tiantian Zhang<sup>1</sup>, Jiakai Lu<sup>2</sup>, He Jing<sup>2</sup>, Mu Jin<sup>3</sup>, Chen Yan<sup>4</sup>, Jing Wang<sup>1,†</sup>

<sup>1</sup>State Key Laboratory of Medical Molecular Biology, Institute of Basic Medical Sciences, Chinese Academy of Medical Sciences, Department of Pathophysiology, Peking Union Medical College, Beijing, China

<sup>2</sup>Department of Anesthesiology, Beijing Anzhen Hospital, Capital Medical University, Beijing Institute of Heart, Lung and Blood Vessel Diseases, Beijing, China

<sup>3</sup>Department of Anesthesiology, Beijing Friendship Hospital, Capital Medical University, Beijing, China

<sup>4</sup>Aab Cardiovascular Research Institute, University of Rochester, School of Medicine and Dentistry, Rochester, NY 14642, USA

\* Ran Gao, Wenjun Guo and Tianfei Fan contributed equally to the manuscript.

† Corresponding authors:

Dr. Jing Wang, State Key Laboratory of Medical Molecular Biology, Institute of Basic Medical Sciences, Chinese Academy of Medical Sciences, Department of Pathophysiology, Peking Union Medical College, Beijing, China. E-mail: wangjing@ibms.pumc.edu.cn.

## Supplementary Figures

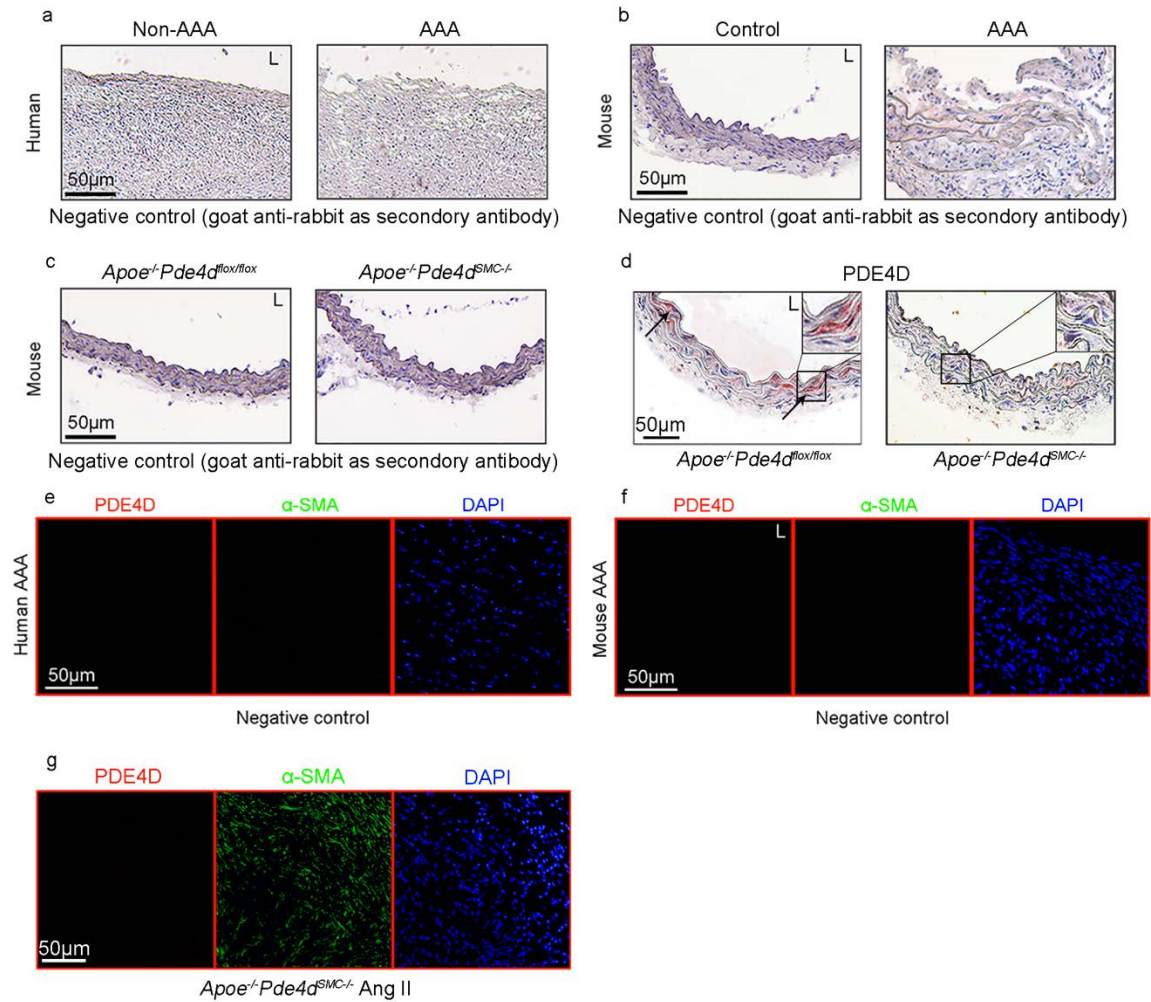

**Supplementary Fig. 1 PDE4D antibody specificity and negative control of immunohistochemical staining.** (a) Representative images of immunohistochemical analysis for negative control (only with goat anti-rabbit antibody as secondary antibody) of PDE4D in human Non-AAA and AAA tissues. (b) Representative images of immunohistochemical analysis for negative control (only with goat anti-rabbit antibody as secondary antibody) of PDE4D in mouse control (*Apoe<sup>-/-</sup>* mice treated with saline) and AAA tissues (*Apoe<sup>-/-</sup>* mice treated with 1000 ng kg<sup>-1</sup> min<sup>-1</sup> Ang II and HFD). (c) Representative images of immunohistochemical analysis for negative control (only with goat anti-rabbit antibody as secondary antibody) of PDE4D in mouse *Apoe<sup>-/-</sup>Pde4d<sup>fllox/fllox</sup>* and *Apoe<sup>-/-</sup>Pde4d<sup>SMC<sup>-/-</sup></sup>* normal aortic vascular tissues. (d) Representative images of immunohistochemistry analysis of PDE4D in the aortas from *Apoe<sup>-/-</sup>Pde4d<sup>fllox/fllox</sup>* and *Apoe<sup>-/-</sup>Pde4d<sup>SMC<sup>-/-</sup></sup>* with saline infusion. (e) Representative images of immunofluorescence analysis for negative control (only with secondary antibody) of PDE4D and α-SMA in human AAA tissues. (f) Representative images of immunofluorescence analysis for negative control (only with secondary antibody) of PDE4D and α-SMA in mouse AAA tissues (*Apoe<sup>-/-</sup>* mice treated with 1000 ng kg<sup>-1</sup> min<sup>-1</sup> Ang II and HFD). (g) Representative images of immunofluorescence analysis of PDE4D in *Apoe<sup>-/-</sup>Pde4d<sup>SMC<sup>-/-</sup></sup>* Ang II mice treated with 1000 ng kg<sup>-1</sup> min<sup>-1</sup> Ang II and HFD. L: lumen.

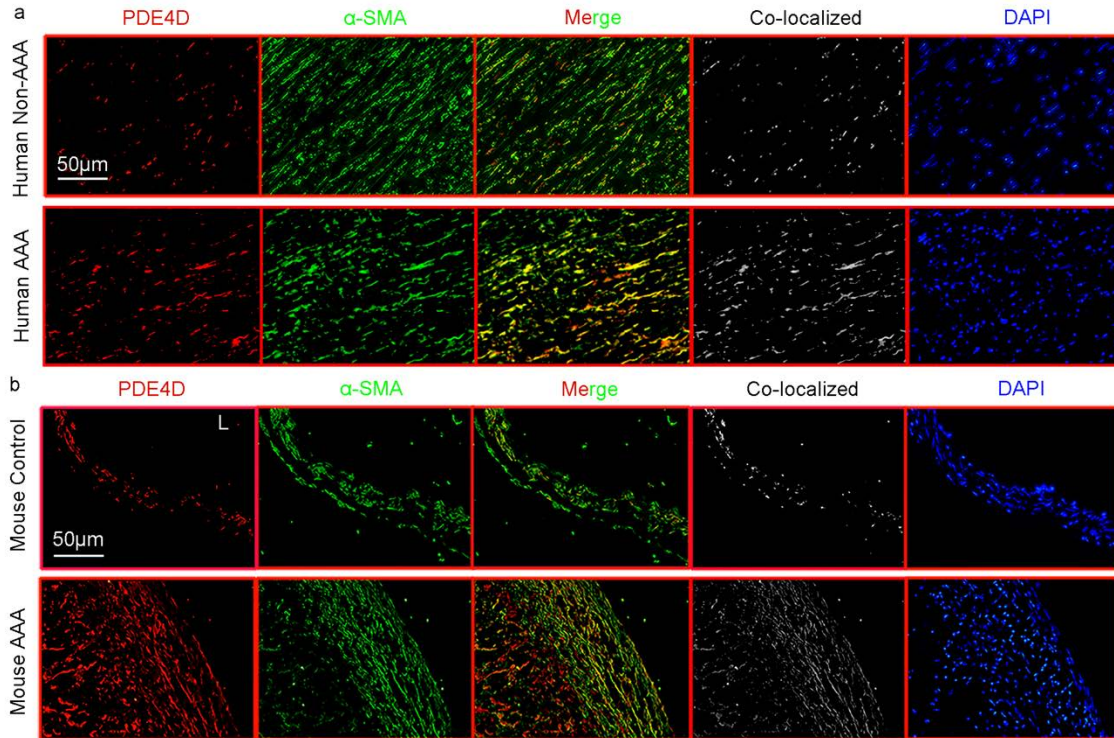

**Supplementary Fig. 2 Immunofluorescence staining of PDE4D,  $\alpha$  smooth muscle actin ( $\alpha$ -SMA, smooth muscle cell marker) and 4',6-diamidino-2-phenylindole (DAPI, nucleus marker).** (a) Immunofluorescence staining of PDE4D,  $\alpha$ -SMA and DAPI in human Non-AAA sections and AAA tissues (6  $\mu$ m). We obtained similar results from at least 3 different sets of human tissues in separate experiments. PDE4D: red,  $\alpha$ -SMA: green, DAPI: blue. (b) Immunofluorescence staining of PDE4D,  $\alpha$ -SMA and DAPI in mouse control sections and AAA tissues (6  $\mu$ m). We obtained similar results from at least 3 different sets of mouse samples in separate experiments. PDE4D: red,  $\alpha$ -SMA: green, DAPI: blue. L: lumen.

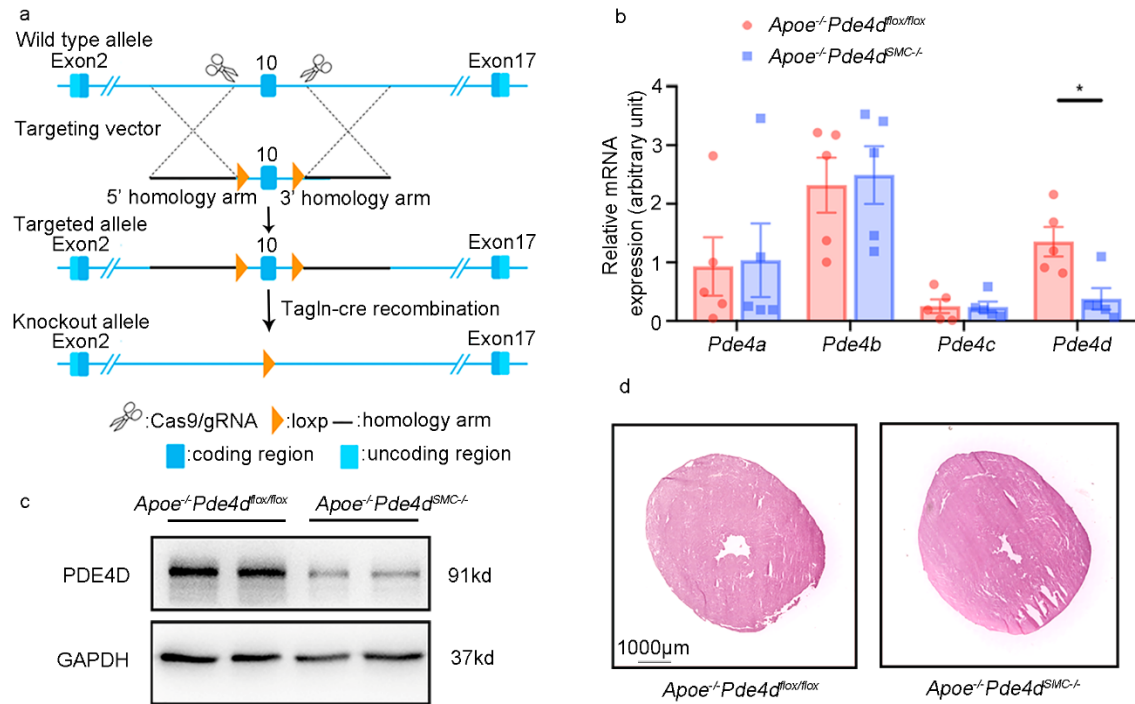

**Supplementary Fig. 3 The identification of smooth muscle cell (SMC)-specific depletion phosphodiesterase (PDE) 4D ( $Pde4d^{SMC-/-}$ ) mice.** (a) Generation of smooth muscle-specific depletion  $Pde4d$  mice via using Cre-LoxP recombination system. Exon10 is deleted on *Tagln*-Cre-mediated recombination. (b) The mRNA levels of  $Pde4a$ ,  $Pde4b$ ,  $Pde4c$  and  $Pde4d$  in mouse aortas. \* $p < 0.05$ , Mann-Whitney test, mean  $\pm$  SEM,  $Apoe^{-/-}Pde4d^{flox/flox}$  (n=5) and  $Apoe^{-/-}Pde4d^{SMC-/-}$  mice (n=5) with saline infusion. (c) Representative immunoblot analysis of PDE4D expression in mouse aortas.  $Apoe^{-/-}Pde4d^{flox/flox}$  (n=2) and  $Apoe^{-/-}Pde4d^{SMC-/-}$  mice (n=2) with saline infusion. (d) Representative images of heart tissues by H and E staining in  $Apoe^{-/-}Pde4d^{flox/flox}$  and  $Apoe^{-/-}Pde4d^{SMC-/-}$  with saline infusion.

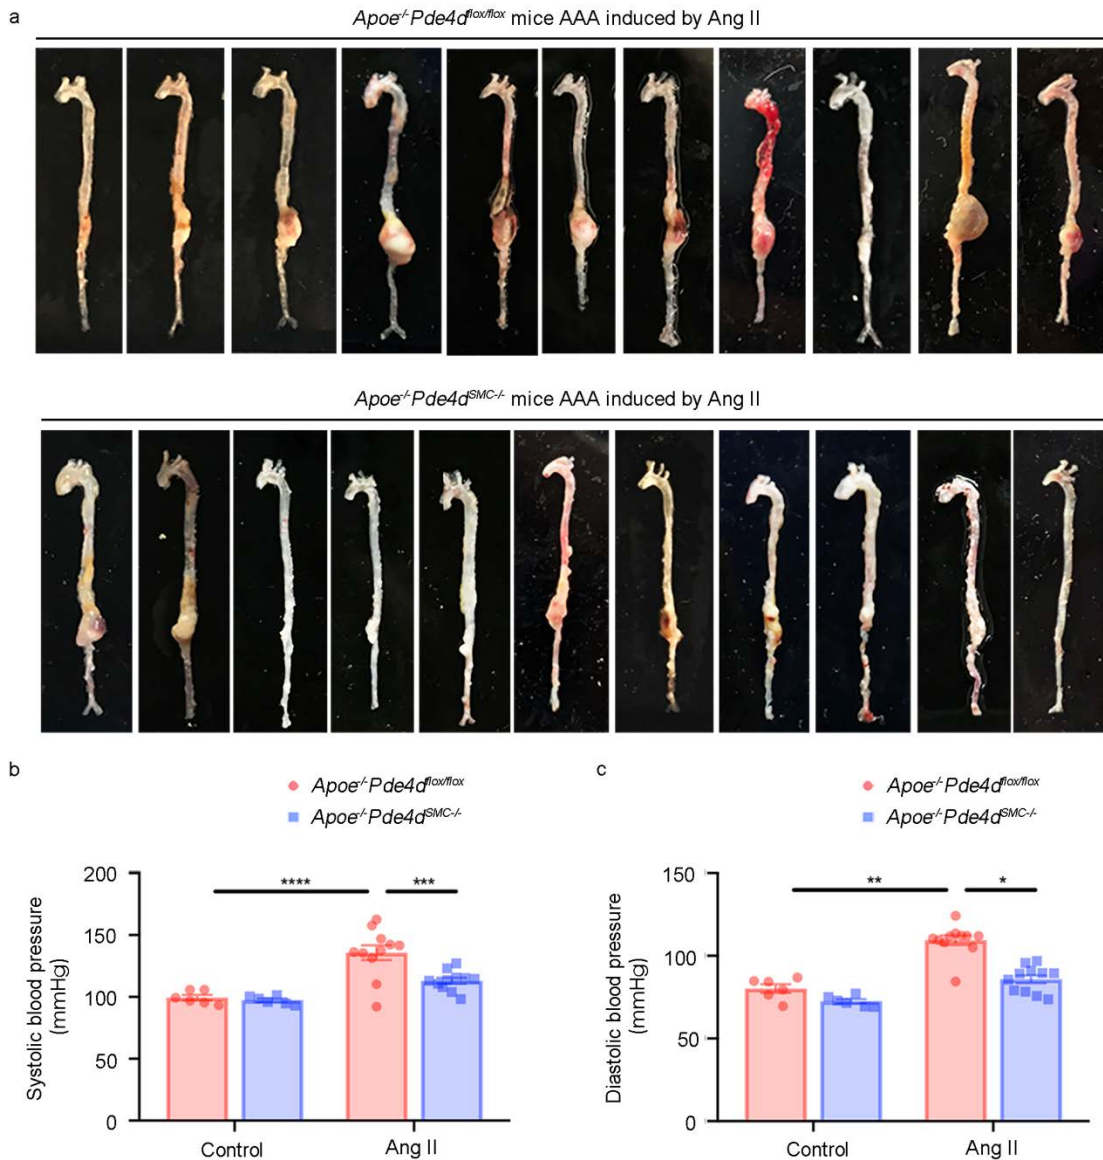

**Supplementary Fig. 4** The all AAA sample images and blood pressure of *Apoe<sup>-/-</sup>Pde4d<sup>fllox/fllox</sup>* and *Apoe<sup>-/-</sup>Pde4d<sup>SMC-/-</sup>* mice. (a) Images of all AAA samples shown in Fig. 3b-c. (b) Systolic blood pressure in *Apoe<sup>-/-</sup>Pde4d<sup>fllox/fllox</sup>* and *Apoe<sup>-/-</sup>Pde4d<sup>SMC-/-</sup>* mice. Each dot represents an individual mouse. \*\*\* $p < 0.001$ , \*\*\*\* $p < 0.0001$ , two-way ANOVA with Holm-Sidak's post-hoc test, mean  $\pm$  SEM, *Apoe<sup>-/-</sup>Pde4d<sup>fllox/fllox</sup>* (n=6) and *Apoe<sup>-/-</sup>Pde4d<sup>SMC-/-</sup>* (n=6) with saline infusion, *Apoe<sup>-/-</sup>Pde4d<sup>fllox/fllox</sup>* (n=11) and *Apoe<sup>-/-</sup>Pde4d<sup>SMC-/-</sup>* (n=11) with Ang II infusion. (c) Diastolic blood pressure in *Apoe<sup>-/-</sup>Pde4d<sup>fllox/fllox</sup>* and *Apoe<sup>-/-</sup>Pde4d<sup>SMC-/-</sup>* mice. \* $p < 0.05$ , \*\* $p < 0.01$ , ANOVA Kruskal-Wallis test with post Dunn's multiple comparisons test, mean  $\pm$  SEM, *Apoe<sup>-/-</sup>Pde4d<sup>fllox/fllox</sup>* (n=6) and *Apoe<sup>-/-</sup>Pde4d<sup>SMC-/-</sup>* (n=6) with saline infusion, *Apoe<sup>-/-</sup>Pde4d<sup>fllox/fllox</sup>* (n=11) and *Apoe<sup>-/-</sup>Pde4d<sup>SMC-/-</sup>* (n=11) with Ang II infusion.

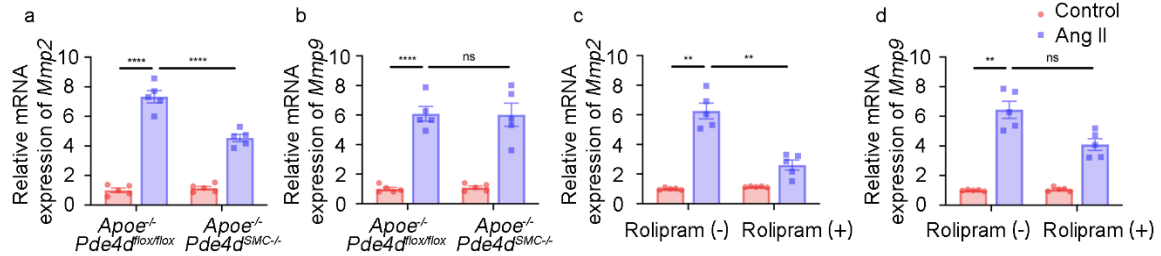

**Supplementary Fig. 5 PDE4D knockout and rolipram regulate AAA induced matrix metalloproteinases *in vivo*.** (a) RT-PCR quantification of *Mmp2* mRNA in aorta of *Apoe<sup>-/-</sup>Pde4d<sup>flox/flox</sup>* and *Apoe<sup>-/-</sup>Pde4d<sup>SMC-/-</sup>* mice with or without 1000 ng kg<sup>-1</sup> min<sup>-1</sup> Ang II treatment and high fat diet (HFD) for 28 days (fold change versus one of control subjects). \*\*\*\**p*<0.0001, two-way ANOVA with Holm-Sidak's post-hoc test, mean ± SEM, *Apoe<sup>-/-</sup>Pde4d<sup>flox/flox</sup>* (n=5) and *Apoe<sup>-/-</sup>Pde4d<sup>SMC-/-</sup>* (n=5) with saline infusion, *Apoe<sup>-/-</sup>Pde4d<sup>flox/flox</sup>* (n=5) and *Apoe<sup>-/-</sup>Pde4d<sup>SMC-/-</sup>* (n=5) with Ang II infusion. (b) RT-PCR quantification of *Mmp9* mRNA in aorta of *Apoe<sup>-/-</sup>Pde4d<sup>flox/flox</sup>* and *Apoe<sup>-/-</sup>Pde4d<sup>SMC-/-</sup>* mice with or without 1000 ng kg<sup>-1</sup> min<sup>-1</sup> Ang II treatment and high fat diet (HFD) for 28 days (fold change versus one of control subjects). \*\*\*\**p*<0.0001, ns: no significant difference, two-way ANOVA with Holm-Sidak's post-hoc test, mean ± SEM, *Apoe<sup>-/-</sup>Pde4d<sup>flox/flox</sup>* (n=5) and *Apoe<sup>-/-</sup>Pde4d<sup>SMC-/-</sup>* (n=5) with saline infusion, *Apoe<sup>-/-</sup>Pde4d<sup>flox/flox</sup>* (n=5) and *Apoe<sup>-/-</sup>Pde4d<sup>SMC-/-</sup>* (n=5) with Ang II infusion. (c) RT-PCR quantification of *Mmp2* mRNA in aorta of *Apoe<sup>-/-</sup>* mice with or without Ang II and high fat diet (HFD) / rolipram treatment. (fold change versus one of control subjects). \*\**p*<0.01, Welch ANOVA with Dunnett's T3 post-hoc test, mean ± SEM, Vehicle (n=5) and Rolipram (n=5) with saline infusion, Vehicle (n=5) and Rolipram (n=5) with Ang II infusion. (d) RT-PCR quantification of *Mmp9* mRNA in aorta of *Apoe<sup>-/-</sup>* mice with or without Ang II and high fat diet (HFD) / rolipram treatment. (fold change versus one of control subjects). \*\**p*<0.01, ns: no significant difference, Welch ANOVA with Dunnett's T3 post-hoc test, mean ± SEM, Vehicle (n=5) and Rolipram (n=5) with saline infusion, Vehicle (n=5) and Rolipram (n=5) with Ang II infusion.

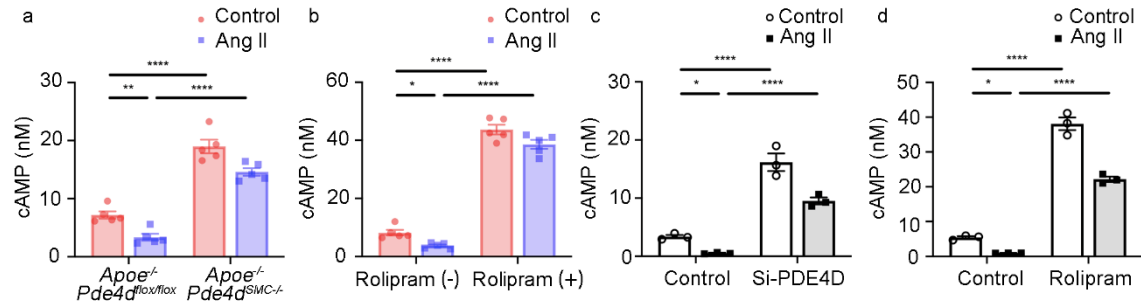

**Supplementary Fig. 6 PDE4D suppression and rolipram activate cAMP production *in vivo* and *in vitro*.**

(a) cAMP concentration (nM) in aorta of *Apoe<sup>-/-</sup> Pde4d<sup>flox/flox</sup>* and *Apoe<sup>-/-</sup> Pde4d<sup>SMC-/-</sup>* mice with or without 1000 ng kg<sup>-1</sup> min<sup>-1</sup> Ang II treatment and high fat diet (HFD) for 28 days. \*\**p*<0.01, \*\*\*\**p*<0.0001, two-way ANOVA with Holm-Sidak's post-hoc test, mean ± SEM, *Apoe<sup>-/-</sup> Pde4d<sup>flox/flox</sup>* (n=5) and *Apoe<sup>-/-</sup> Pde4d<sup>SMC-/-</sup>* (n=5) with saline infusion, *Apoe<sup>-/-</sup> Pde4d<sup>flox/flox</sup>* (n=5) and *Apoe<sup>-/-</sup> Pde4d<sup>SMC-/-</sup>* (n=5) with Ang II infusion. (b) cAMP concentration (nM) in aorta of *Apoe<sup>-/-</sup>* mice with or without Ang II and high fat diet (HFD) / rolipram treatment. \**p*<0.05, \*\*\*\**p*<0.0001, two-way ANOVA with Holm-Sidak's post-hoc test, mean ± SEM, Vehicle (n=5) and Rolipram (n=5) with saline infusion, Vehicle (n=5) and Rolipram (n=5) with Ang II infusion. (c) cAMP concentration (nM) in SMCs treated with Ang II (100 nM, 24h) and / or PDE4D siRNA (200 nM, 48h) as indicated. \**p*<0.05, \*\*\*\**p*<0.0001, two-way ANOVA with Holm-Sidak's post-hoc test, mean ± SEM, n=3 separate experiments. (d) cAMP concentration (nM) in SMCs treated with or without Ang II (100 nM, 24h) / rolipram (500 nM, 24.5h) as indicated. \**p*<0.05, \*\*\*\**p*<0.0001, two-way ANOVA with Holm-Sidak's post-hoc test, mean ± SEM, n=3 separate experiments.

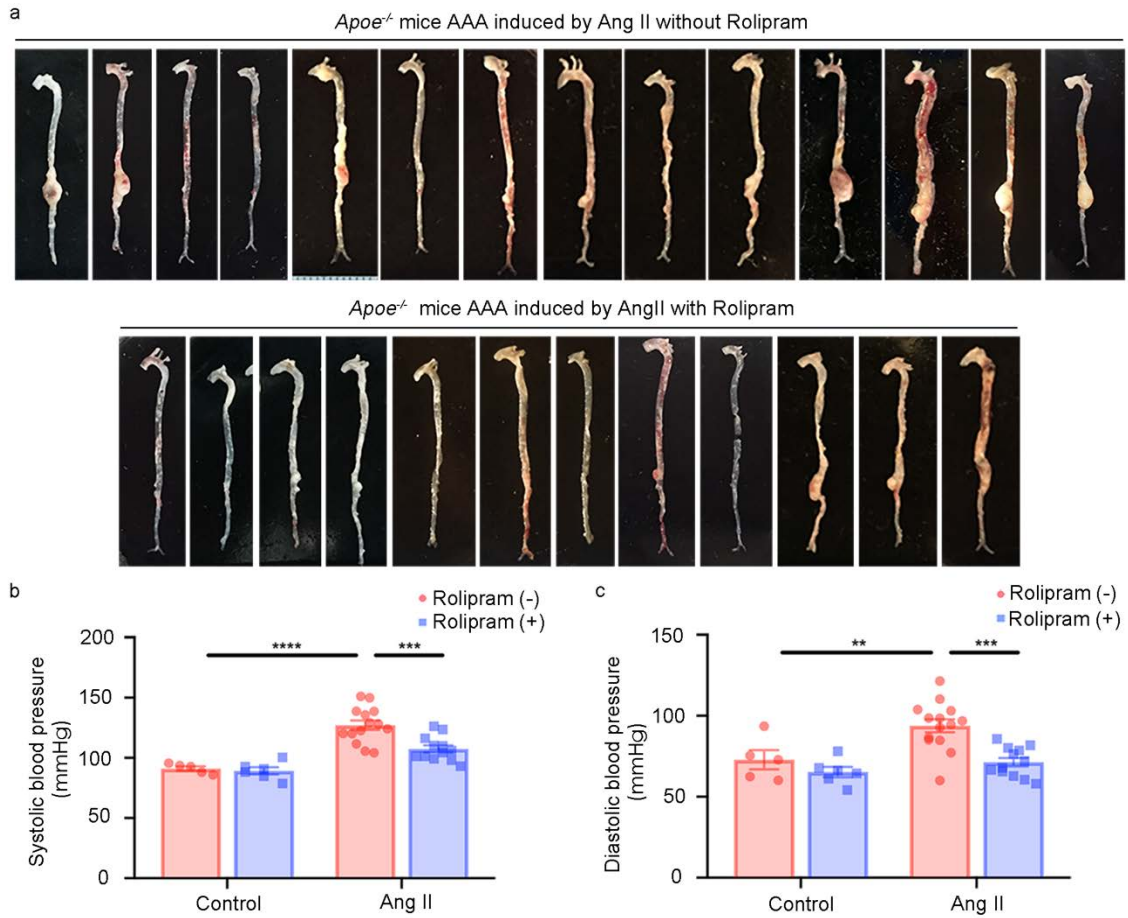

**Supplementary Fig. 7 The all AAA sample images and blood pressure of *Apo<sup>e</sup><sup>-/-</sup>* mice with or without rolipram treatment.** (a) Images of all AAA samples shown in Fig. 4b-c. (b) Systolic blood pressure in *Apo<sup>e</sup><sup>-/-</sup>* mice with or without Ang II/rolipram treatment. \*\*\* $p < 0.001$ , \*\*\*\* $p < 0.0001$ , two-way ANOVA with Holm-Sidak's post-hoc test, mean  $\pm$  SEM, Vehicle (n=5) and Rolipram (n=6) with saline infusion, Vehicle (n=14) and Rolipram (n=12) with Ang II infusion. (c) Diastolic blood pressure in *Apo<sup>e</sup><sup>-/-</sup>* mice with or without Ang II/rolipram treatment. \*\* $p < 0.01$ , \*\*\* $p < 0.001$ , two-way ANOVA with Holm-Sidak's post-hoc test, mean  $\pm$  SEM, Vehicle (n=5) and Rolipram (n=6) with saline infusion, Vehicle (n=14) and Rolipram (n=12) with Ang II infusion.



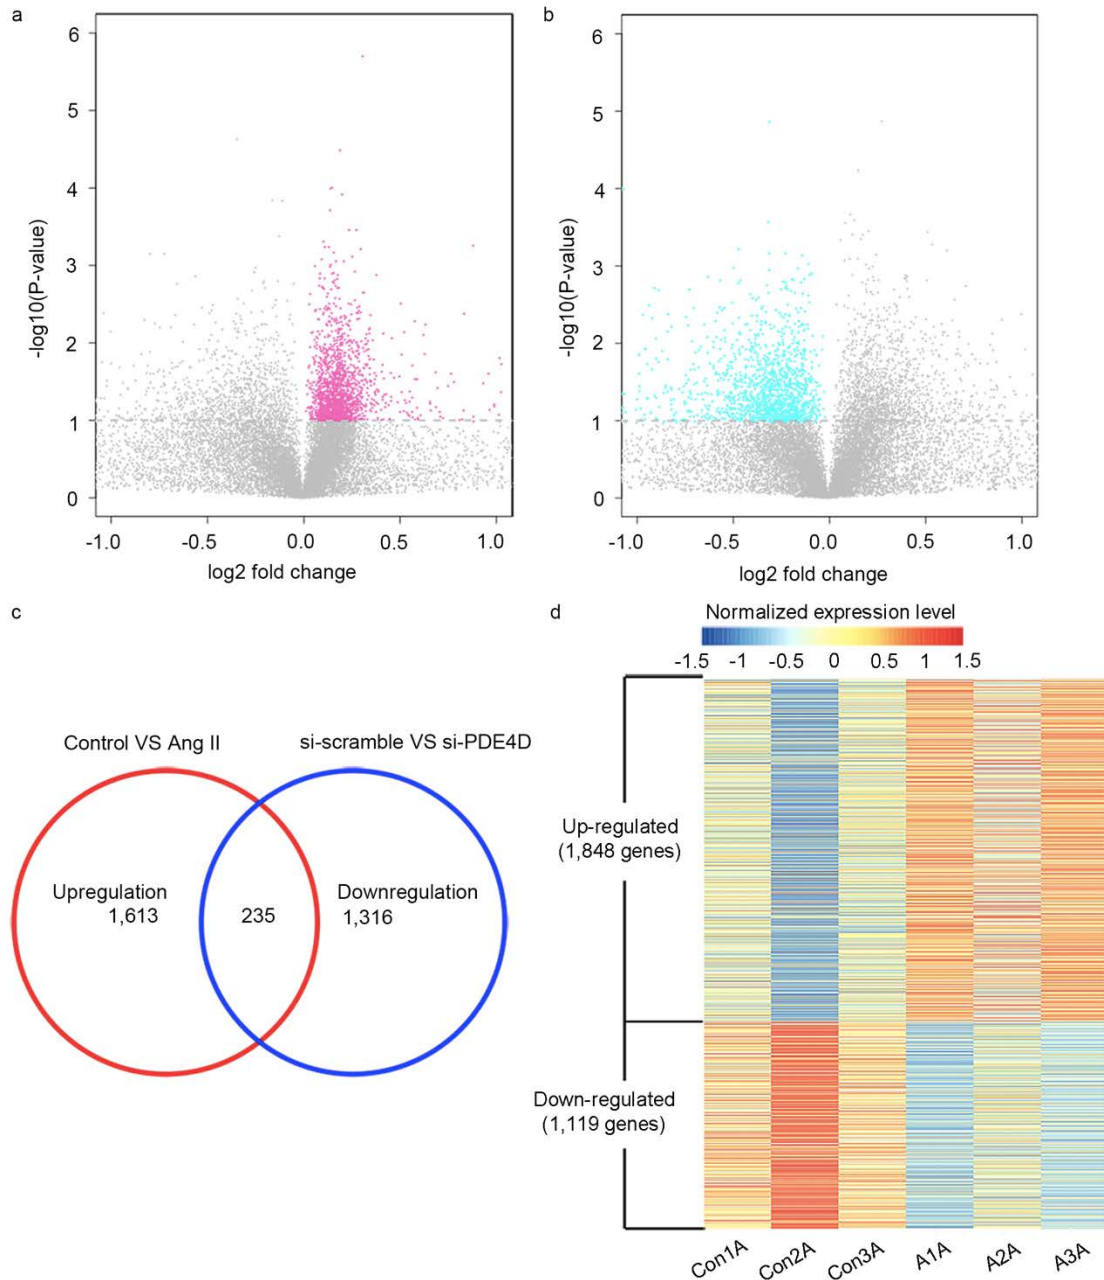

**Supplementary Fig. 8 Significantly altered genes and pathways in SMCs treated with Ang II (100 nM, 24h) or PDE4D siRNA (200 nM, 48h) through RNA sequencing.** (a) Volcano plot of the differentially expressed genes in SMC treated with Ang II. Pink dots represent genes with increased expression after Ang II treatment. (b) Volcano plot of the differentially expressed genes in SMC treated with PDE4D siRNA. Blue dots represent genes with decreased expression after the treatment of PDE4D siRNA. (c) Venn diagram of differentially expressed genes between the up-regulated genes in Ang II stimulated SMCs and the down-regulated genes in PDE4D siRNA treated SMCs. (d) Heatmap of genes differentially expressed in SMCs with or without Ang II (100 nM, 24h) stimulation. There are 3 replicates per group, with each column represents an individual replicate. Each row represents an individual gene. The color bar represents normalized expression levels (row z-score) of genes, with upregulated genes shown in red and downregulated genes in blue.

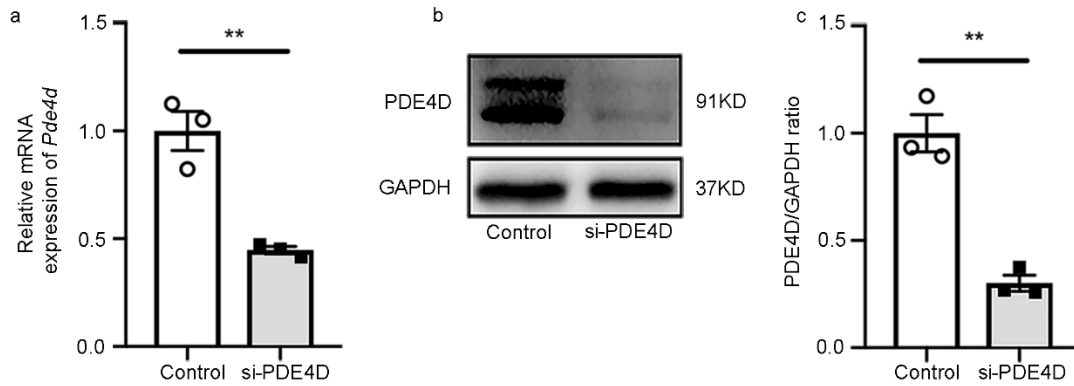

**Supplementary Fig. 9 The mRNA and protein expression of PDE4D after transfection with PDE4D siRNA in SMCs.** (a) SMCs were transfected with control siRNA or PDE4D siRNA for 48h (200 nM), and *Pde4d* expression was then detected by RT-PCR.  $**p < 0.01$ , unpaired Student's t-test, mean  $\pm$  SEM, n=3 separate experiments. (b) Immunoblot analysis of PDE4D expression in SMCs treated with PDE4D siRNA (200 nM, 48h). (c) Quantification of PDE4D protein expression by immunoblotting in (b) normalized to GAPDH protein (fold change versus controls).  $**p < 0.01$ , unpaired Student's t-test, mean  $\pm$  SEM, n=3 separate experiments.

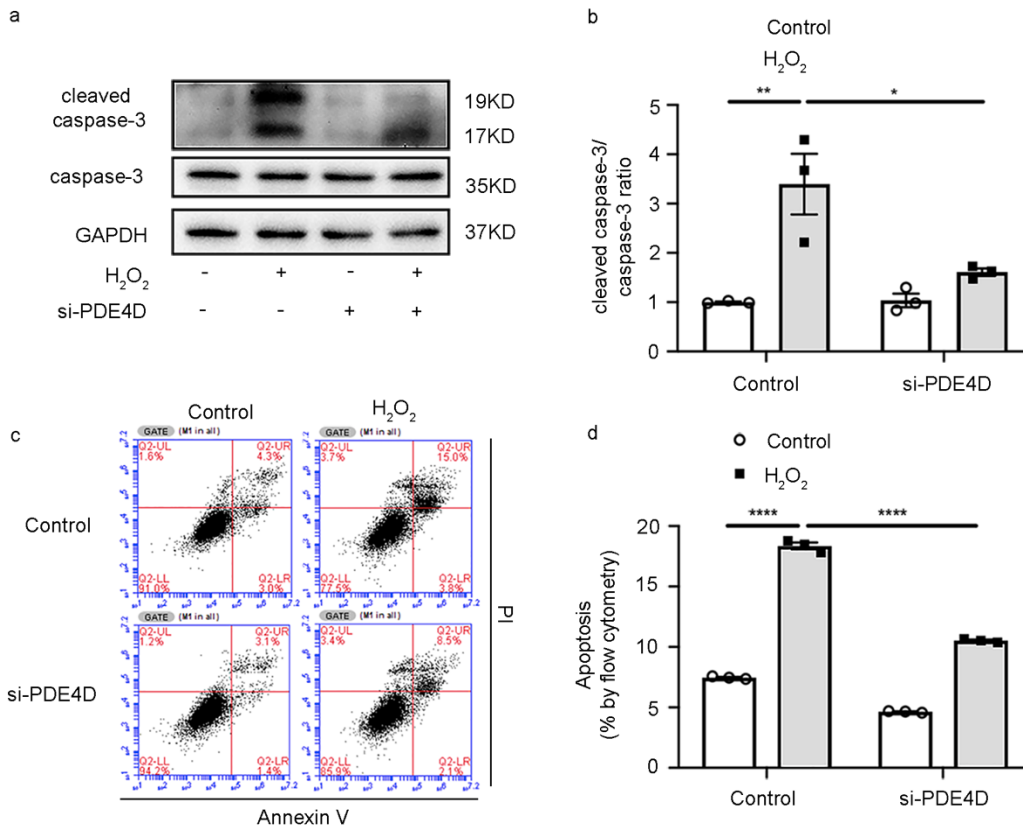

**Supplementary Fig. 10 PDE4D siRNA inhibits H<sub>2</sub>O<sub>2</sub>-induced smooth muscle cell (SMC) apoptosis *in vitro*.** (a) Immunoblot analysis of caspase-3 and cleaved caspase-3 expression in SMCs treated with or without H<sub>2</sub>O<sub>2</sub> (300  $\mu$ M, 24h) / PDE4D siRNA (200 nM, 48h) as indicated. (b) Quantification of cleaved caspase-3 protein expression by immunoblotting in (a) normalized to caspase-3 protein (fold change versus control). \* $p$ <0.05, \*\* $p$ <0.01, two-way ANOVA with Holm-Sidak's post-hoc test, mean  $\pm$  SEM, n=3 separate experiments. (c) Flow cytometric analysis of annexin V/ propidium iodide (PI) stained SMCs treated with or without H<sub>2</sub>O<sub>2</sub> (300  $\mu$ M, 24h) / PDE4D siRNA (200 nM, 48h) as indicated. (d) Quantification of total (early and late) apoptosis rates of annexin V/PI stained SMCs treated with or without H<sub>2</sub>O<sub>2</sub> (300  $\mu$ M, 24h) / PDE4D siRNA (200 nM, 48h) as indicated. \*\*\*\* $p$ <0.0001, two-way ANOVA with Holm-Sidak's post-hoc test, mean  $\pm$  SEM, n=3 separate experiments.

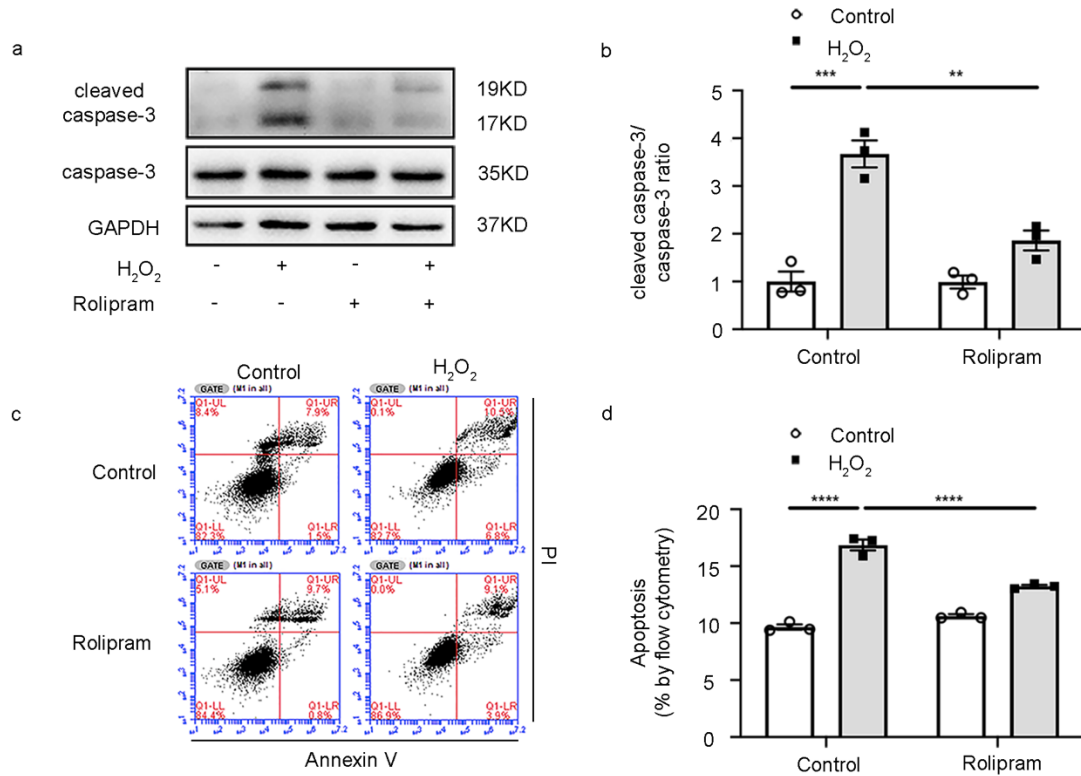

**Supplementary Fig. 11 Rolipram inhibits H<sub>2</sub>O<sub>2</sub>-induced SMC apoptosis *in vitro*.** (a) Immunoblot analysis of caspase-3 and cleaved caspase-3 expression in SMCs treated with or without H<sub>2</sub>O<sub>2</sub> (300 μM, 24h) / rolipram (500 nM, 24.5h). (b) Quantification of cleaved caspase-3 protein expression by immunoblotting in (a) normalized to caspase-3 protein (fold change versus control). \*\* $p < 0.01$ , \*\*\* $p < 0.001$ , two-way ANOVA with Holm-Sidak's post-hoc test, mean ± SEM, n=3 separate experiments. (c) Flow cytometric analysis of annexin V/ propidium iodide (PI) stained SMCs treated with or without H<sub>2</sub>O<sub>2</sub> (300 μM, 24h) / rolipram (500 nM, 24.5h) as indicated. (d) Quantification of total (early and late) apoptosis rates of annexin V/PI stained SMCs treated with or without H<sub>2</sub>O<sub>2</sub> (300 μM, 24h) / rolipram (500 nM, 24.5h) as indicated. \*\*\*\* $p < 0.0001$ , two-way ANOVA with Holm-Sidak's post-hoc test, mean ± SEM, n=3 separate experiments.

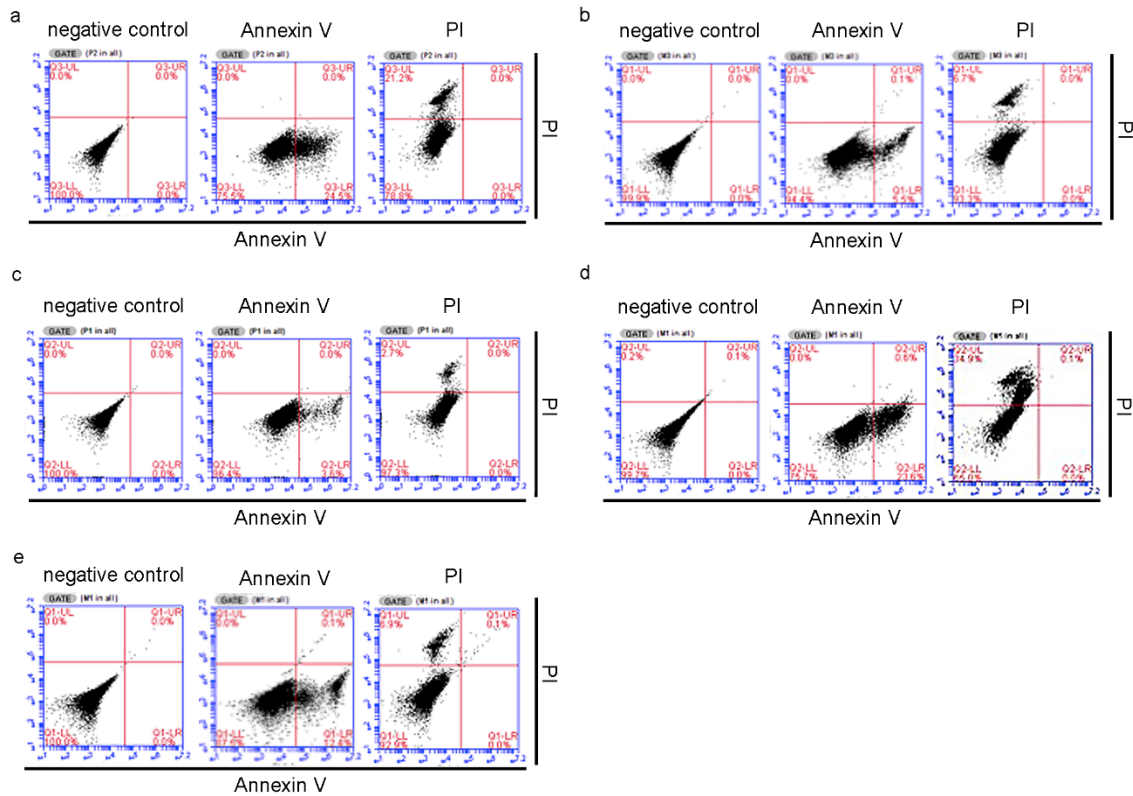

**Supplementary Fig. 12 Negative control, Annexin V positive cells, PI positive cells of flow cytometric.**

(a) Negative control, PI positive cells, Annexin V positive cells of flow cytometric analysis of annexin V/PI stained SMCs treated with or without Ang II (100 nM, 24h) / PDE4D siRNA (200 nM, 48h) in Fig. 5d. (b) Negative control, PI positive cells, Annexin V positive cells of flow cytometric analysis of annexin V/PI stained SMCs treated with or without Ang II (100 nM, 24h) / rolipram (500 nM, 24.5h) in Fig. 5h. (c) Negative control, PI positive cells, Annexin V positive cells of flow cytometric analysis of annexin V/PI stained SMCs treated with or without HIF1an siRNA (100 nM, 48h) / PDE4D siRNA (200 nM, 48h) in Fig. 7h. (d) Negative control, PI positive cells, Annexin V positive cells of flow cytometric analysis of annexin V/PI stained SMCs treated with or without H<sub>2</sub>O<sub>2</sub> (300 μM, 24h) / PDE4D siRNA (200 nM, 48h) in Supplementary Fig. 10c. (e) Negative control, PI positive cells, Annexin V positive cells of flow cytometric analysis of annexin V/PI stained SMCs treated with or without H<sub>2</sub>O<sub>2</sub> (300 μM, 24h) / rolipram (500 nM, 24.5h) in Supplementary Fig. 11c.

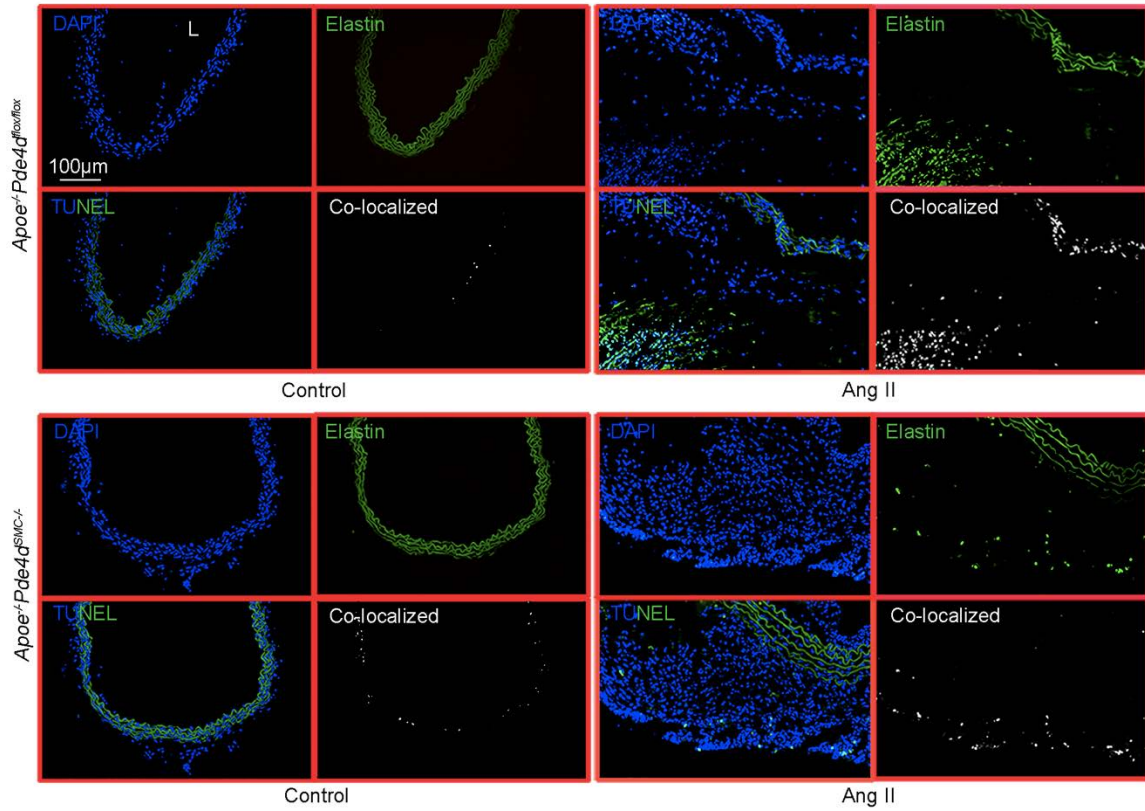

**Supplementary Fig. 13** Representative images of terminal deoxynucleotidyl transferase (TdT)-mediated dUTP nick-end labeling (TUNEL) staining of apoptosis cells in abdominal aorta tissue in *Apoe<sup>-/-</sup>Pde4d<sup>flox/flox</sup>* and *Apoe<sup>-/-</sup>Pde4d<sup>SMC-/-</sup>* mice with or without Ang II treatment.

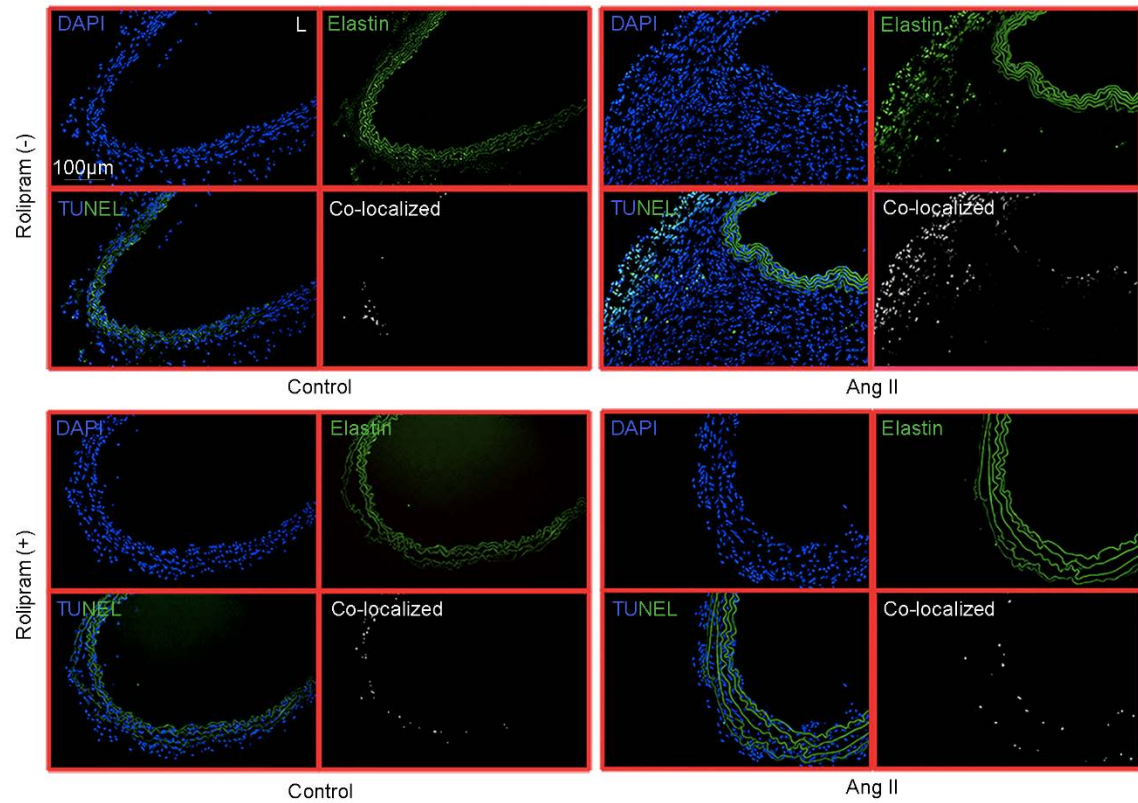

**Supplementary Fig. 14** Representative images of TUNEL staining of apoptosis cells in abdominal aorta tissue in *ApoE*<sup>-/-</sup> mice treated with or without Ang II / rolipram.

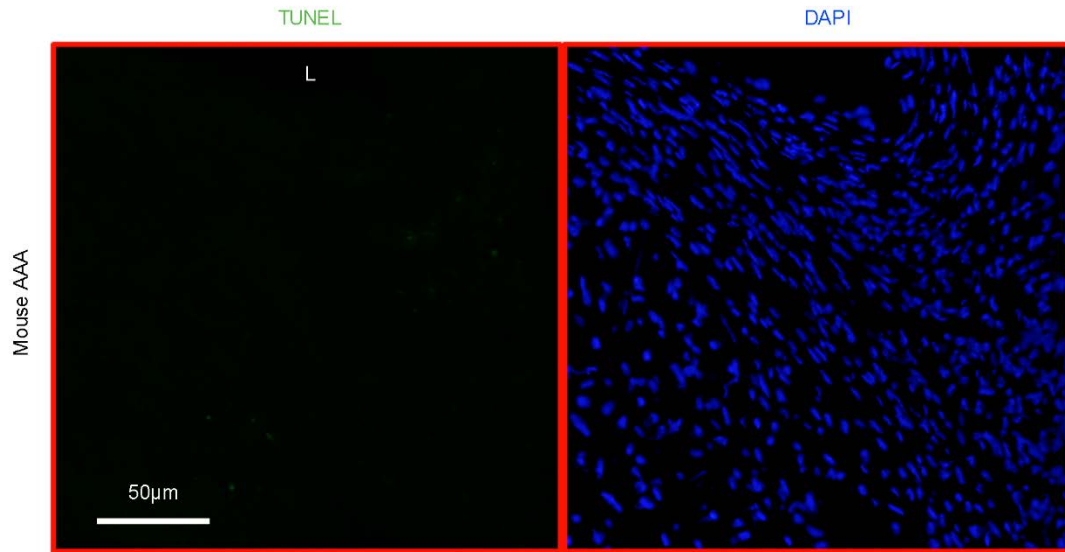

Negative control

**Supplementary Fig. 15** Representative images of negative control of TUNEL staining in mouse AAA tissues (*Apoe*<sup>-/-</sup> mice treated with 1000 ng kg<sup>-1</sup> min<sup>-1</sup> Ang II and HFD). L: lumen.



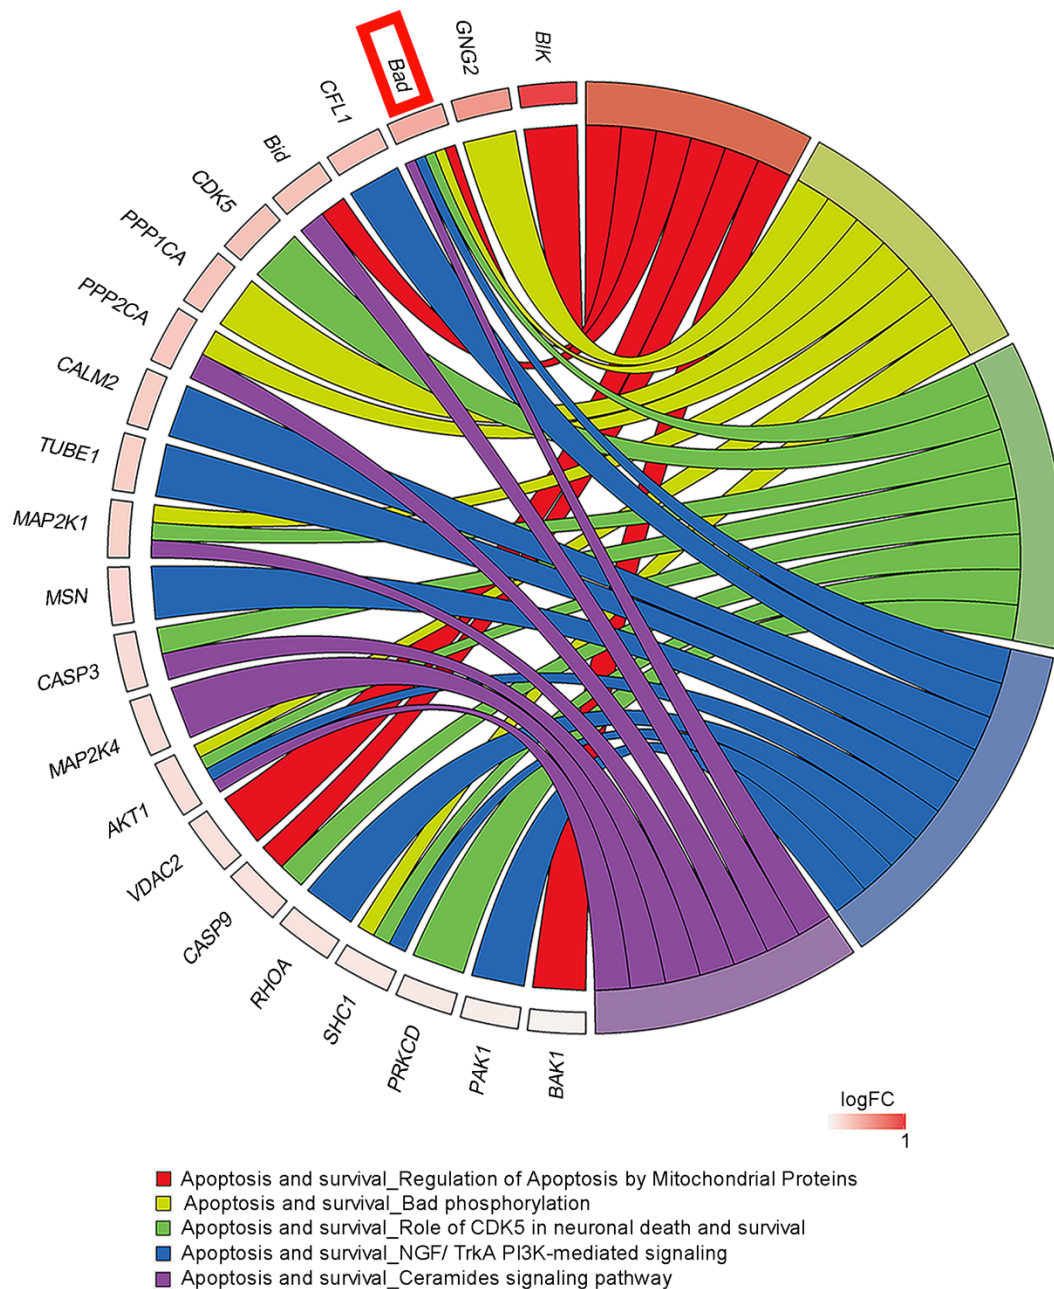

**Supplementary Fig. 16** The relationship between selected apoptosis-related pathways and the differentially expressed genes (DEGs). The right half of the circle displayed the five apoptosis-related pathways we focused on, and the left half of the circle displayed the DEGs that are involved in these pathways. Each link between them represented that the gene was assigned to the corresponding pathway. The genes were ordered based on their “logFC” during the differential analysis.

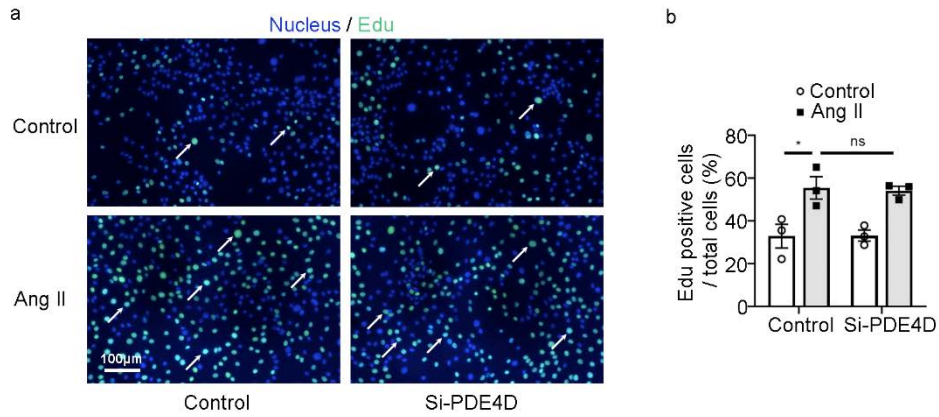

**Supplementary Fig. 17 PDE4D suppression does not affect Ang II induced proliferation in SMCs.** (a) Representative images of EdU staining in SMCs treated with Ang II (100 nM, 24h) and / or PDE4D siRNA (200 nM, 48h) as indicated. (b) Quantification of SMC proliferation rates by EdU staining in (a). EdU positive cell rate was mean value of three random view in each separate experiment. \* $p < 0.05$ , ns: no significant difference, two-way ANOVA with Holm-Sidak's post-hoc test, mean  $\pm$  SEM,  $n = 3$  separate experiments.

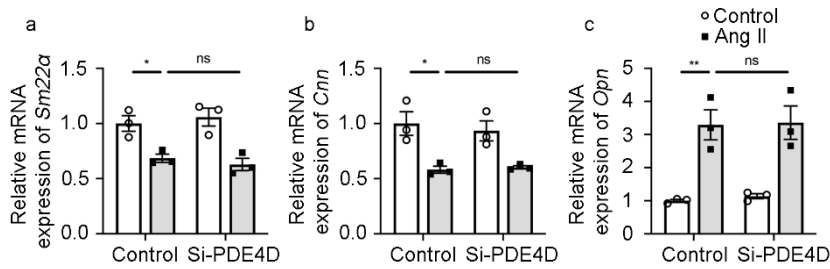

**Supplementary Fig. 18 PDE4D suppression do not regulate Ang II induced dedifferentiation in SMCs.**

(a) RT-PCR analysis of *Sm22α* expression in SMCs treated with Ang II (100 nM, 24h) and / or PDE4D siRNA (200 nM, 48h) as indicated (fold change versus control). \* $p < 0.05$ , ns: no significant difference, two-way ANOVA with Holm-Sidak's post-hoc test, mean  $\pm$  SEM,  $n=3$  separate experiments. (b) RT-PCR analysis of *Cnn* expression in SMCs treated with Ang II (100 nM, 24h) and / or PDE4D siRNA (200 nM, 48h) as indicated (fold change versus control). \* $p < 0.05$ , ns: no significant difference, two-way ANOVA with Holm-Sidak's post-hoc test, mean  $\pm$  SEM,  $n=3$  separate experiments. (c) RT-PCR analysis of *Opn* expression in SMCs treated with Ang II (100 nM, 24h) and / or PDE4D siRNA (200 nM, 48h) as indicated (fold change versus control). \*\* $p < 0.01$ , ns: no significant difference, two-way ANOVA with Holm-Sidak's post-hoc test, mean  $\pm$  SEM,  $n=3$  separate experiments.

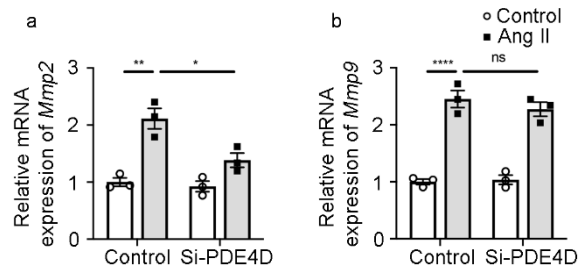

**Supplementary Fig. 19 PDE4D suppression regulate Ang II induced matrix metalloproteinases in SMCs.**

(a) RT-PCR analysis of *Mmp2* expression in SMCs treated with Ang II (100 nM, 24h) and / or PDE4D siRNA (200 nM, 48h) as indicated (fold change versus control). \* $p < 0.05$ , \*\* $p < 0.01$ , two-way ANOVA with Holm-Sidak's post-hoc test, mean  $\pm$  SEM,  $n = 3$  separate experiments. (b) RT-PCR analysis of *Mmp9* expression in SMCs treated with Ang II (100 nM, 24h) and / or PDE4D siRNA (200 nM, 48h) as indicated (fold change versus control). \*\*\*\* $p < 0.0001$ , ns: no significant difference, two-way ANOVA with Holm-Sidak's post-hoc test, mean  $\pm$  SEM,  $n = 3$  separate experiments.

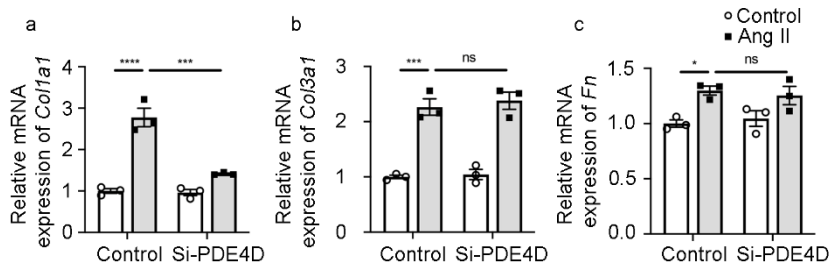

**Supplementary Fig. 20 PDE4D suppression and rolipram regulate Ang II induced deposition of extracellular matrix in SMCs.** (a) RT-PCR analysis of *Col1a1* expression in SMCs treated with Ang II (100 nM, 24h) and / or PDE4D siRNA (200 nM, 48h) as indicated (fold change versus control). \*\*\* $p < 0.001$ , \*\*\*\* $p < 0.0001$ , two-way ANOVA with Holm-Sidak's post-hoc test, mean  $\pm$  SEM,  $n=3$  separate experiments. (b) RT-PCR analysis of *Col3a1* expression in SMCs treated with Ang II (100 nM, 24h) and / or PDE4D siRNA (200 nM, 48h) as indicated (fold change versus control). \*\*\* $p < 0.001$ , ns: no significant difference, two-way ANOVA with Holm-Sidak's post-hoc test, mean  $\pm$  SEM,  $n=3$  separate experiments. (c) RT-PCR analysis of *Fn* expression in SMCs treated with Ang II (100 nM, 24h) and / or PDE4D siRNA (200 nM, 48h) as indicated (fold change versus control). \* $p < 0.05$ , ns: no significant difference, two-way ANOVA with Holm-Sidak's post-hoc test, mean  $\pm$  SEM,  $n=3$  separate experiments.

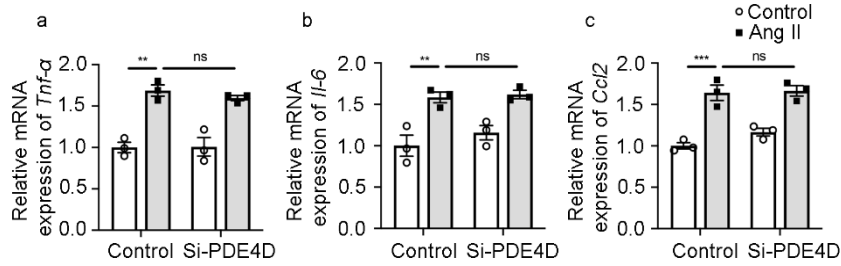

**Supplementary Fig. 21 PDE4D suppression and rolipram do not regulate Ang II induced inflammation in SMCs.** (a) RT-PCR analysis of *Tnf-α* expression in SMCs treated with Ang II (100 nM, 24h) and / or PDE4D siRNA (200 nM, 48h) as indicated (fold change versus control). \*\* $p < 0.01$ , ns: no significant difference, two-way ANOVA with Holm-Sidak's post-hoc test, mean  $\pm$  SEM,  $n=3$  separate experiments. (b) RT-PCR analysis of *Il-6* expression in SMCs treated with Ang II (100 nM, 24h) and / or PDE4D siRNA (200 nM, 48h) as indicated (fold change versus control). \*\* $p < 0.01$ , ns: no significant difference, two-way ANOVA with Holm-Sidak's post-hoc test, mean  $\pm$  SEM,  $n=3$  separate experiments. (c) RT-PCR analysis of *Ccl2* expression in SMCs treated with Ang II (100 nM, 24h) and / or PDE4D siRNA (200 nM, 48h) as indicated (fold change versus control). \*\*\* $p < 0.001$ , ns: no significant difference, two-way ANOVA with Holm-Sidak's post-hoc test, mean  $\pm$  SEM,  $n=3$  separate experiments.

## Supplementary Tables

**Supplementary Table 1. Clinical information of human samples**

|                           | Control (n=6) | AAA patients (n=9) | <i>p</i> |
|---------------------------|---------------|--------------------|----------|
| Sex: Male <sup>F</sup>    | 83.33% (5/6)  | 100% (9/9)         | 0.400    |
| Age(yrs) <sup>T</sup>     |               |                    |          |
| Mean                      | 72.17± 22.46  | 48.56± 15.46       | 0.054    |
| Median                    | 83.5          | 49                 |          |
| Range                     | 42-92         | 15-65              |          |
| Hypertension <sup>F</sup> | 0% (0/6)      | 33.33% (3/9)       | 0.229    |
| Diabetes <sup>F</sup>     | 16.67% (1/6)  | 11.11% (1/9)       | 1.000    |
| Smoking <sup>F</sup>      | 0% (0/6)      | 44.44% (4/9)       | 0.103    |
| Alcohol <sup>F</sup>      | 0% (0/6)      | 33.33% (3/9)       | 0.229    |

F Fisher's exact test; T t-test \**p*<0.05

**Supplementary Table 2. Primer sequences**

|                                 | Forward-Primer           | Reverse-Primer              |
|---------------------------------|--------------------------|-----------------------------|
| <i>hPDE4A</i>                   | CTGCGACATCTTCCAGAACCTC   | GCTGGTCACTTTCTTGGTCTCC      |
| <i>hPDE4B</i>                   | TAGTCAGCCTCCTGTCTCCAGA   | GAAGCCATCTCACTGACAGACC      |
| <i>hPDE4C</i>                   | AGGTCACTACCACGCCAATGTG   | CAGCCAGGATTTCCAAGTCTGTG     |
| <i>hPDE4D</i>                   | GGACACTTTGGAGGACAATCGTG  | CCTTTTCCGTGTCTGACTCACC      |
| <i>mPde4a</i>                   | AAAGCTGGTACACACCCGGAAG   | CAGGCCCCATTTGCTCAAGT        |
| <i>mPde4b</i>                   | CAACGCCAGACACTCAGGAA     | AGAACACCGGAGCTTGTCCAC       |
| <i>mPde4c</i>                   | GGTGTGATCCTGAGACGGTT     | TTTCGAGGTCAAAGCTGCTC        |
| <i>mPde4d</i>                   | CTCTCGGAGCAAAAGTGCCT     | GATTCGCTTCGCAAGTCTGC        |
| <i>mMmp2</i>                    | CAAGGATGGACTCCTGGCACAT   | TACTCGCCATCAGCGTTCCCAT      |
| <i>mMmp9</i>                    | GTATGGTCGTGGCTCTAAGC     | AAAACCCTCTTGGTCTGCGG        |
| <i>rPde4d</i>                   | CCATGTGCAACCAACCATCC     | GGTGAGCTCCCGATTAAGCA        |
| <i>rMmp2</i>                    | CAGACAAAGAGTTGGCAGTG     | GTTGTAGTTGGCCACATCTG        |
| <i>rMmp9</i>                    | AGGCAGAGGATTACCTGTAC     | ATGATGGTGCCACTTGAGGT        |
| <i>rSm22<math>\alpha</math></i> | CCATCGTGGGACGTCCCAG      | CCTTGATGTCACGGACGATCTCAC    |
| <i>rCnn</i>                     | GGCACCAGCTGGAGAACATAGG   | GGCAGCCCATAACCCGTCATG       |
| <i>rOpn</i>                     | CAGTCGATGTCCCTGACGG      | GTTGCTGTCCTGATCAGAGG        |
| <i>rColl1a1</i>                 | GACTGTCCCAACCCCCAAAA     | CTTGGGTCCCTCGACTCCTA        |
| <i>rCol3a1</i>                  | GGACCAGGCAATGATGGGAA     | CAGGGAAACCCATGACACCA        |
| <i>rFn</i>                      | GGATCCCCTCCCAGAGAAGT     | GGGTGTGGAAGGGTAACCAG        |
| <i>rTnf-<math>\alpha</math></i> | AAATGGGCTCCCTCTCATCAGTTC | TCTGCTTGGTGGTTTGCTACGAC     |
| <i>rIl-6</i>                    | GGATACCACCCACCACAGACCAG  | CGATGAGTTTTCTGACAGTGCATCATC |
| <i>rCcl2</i>                    | GCAGCTCAGCAGAGGTAGTTGG   | CGGTATAGGGTCTGAGAAGATTACCG  |
| <i>Pde4d flox</i>               | TATTGCCCAGGAAACAGTAACA   | GACATCGGCCTTTTCTTCTTCTCC    |
| <i>Pde4d Ko</i>                 | TTGCCCAGGAAACAGTAACAGAAG | AAACAAGCCACCAAACAGCAACAA    |
| <i>Tagln-Cre</i>                | TCGATGCAACGAGTGATGAG     | TCCATGAGTGAACGAACCTG        |



**Supplementary Table 3. Statistics of each figure**

|                 | Figures                                                                                                | Shapiro-Wilk normality test | Brown-Forsythe test                                        | Test                                                                                                                                                                                                                                                                                                                             | Plot         |
|-----------------|--------------------------------------------------------------------------------------------------------|-----------------------------|------------------------------------------------------------|----------------------------------------------------------------------------------------------------------------------------------------------------------------------------------------------------------------------------------------------------------------------------------------------------------------------------------|--------------|
| <b>Figure 1</b> |                                                                                                        |                             |                                                            |                                                                                                                                                                                                                                                                                                                                  |              |
|                 | Figure 1a human <i>PDE4A</i> mRNA, non-AAA vs AAA                                                      | Accept normality            | Reject constancy of variance (F test to compare variances) | Parametric: Welch's t-test                                                                                                                                                                                                                                                                                                       | Mean with SE |
|                 | Figure 1a human <i>PDE4B</i> mRNA, non-AAA vs AAA                                                      | Reject normality            | Accept constancy of variance (F test to compare variances) | Non-parametric: Mann-Whitney test                                                                                                                                                                                                                                                                                                | Mean with SE |
|                 | Figure 1a human <i>PDE4C</i> mRNA, non-AAA vs AAA                                                      | Reject normality            | Reject constancy of variance (F test to compare variances) | Non-parametric: Mann-Whitney test                                                                                                                                                                                                                                                                                                | Mean with SE |
|                 | Figure 1a human <i>PDE4D</i> mRNA, non-AAA vs AAA                                                      | Accept normality            | Accept constancy of variance (F test to compare variances) | Parametric: unpaired Student's t-test                                                                                                                                                                                                                                                                                            | Mean with SE |
|                 | Figure 1b mouse <i>Pde4a</i> mRNA, control vs AAA                                                      | Accept normality            | Accept constancy of variance (F test to compare variances) | Parametric: unpaired Student's t-test                                                                                                                                                                                                                                                                                            | Mean with SE |
|                 | Figure 1b mouse <i>Pde4b</i> mRNA, control vs AAA                                                      | Accept normality            | Accept constancy of variance (F test to compare variances) | Parametric: unpaired Student's t-test                                                                                                                                                                                                                                                                                            | Mean with SE |
|                 | Figure 1b mouse <i>Pde4c</i> mRNA, control vs AAA                                                      | Accept normality            | Accept constancy of variance (F test to compare variances) | Parametric: unpaired Student's t-test                                                                                                                                                                                                                                                                                            | Mean with SE |
|                 | Figure 1b mouse <i>Pde4d</i> mRNA, control vs AAA                                                      | Accept normality            | Accept constancy of variance (F test to compare variances) | Parametric: unpaired Student's t-test                                                                                                                                                                                                                                                                                            | Mean with SE |
|                 | Figure 1d human PDE4D protein, non-AAA vs AAA                                                          | Reject normality            | Reject constancy of variance (F test to compare variances) | Non-parametric: Mann-Whitney test                                                                                                                                                                                                                                                                                                | Mean with SE |
|                 | Figure 1f mouse PDE4D protein, control vs AAA                                                          | Accept normality            | Accept constancy of variance (F test to compare variances) | Parametric: unpaired Student's t-test                                                                                                                                                                                                                                                                                            | Mean with SE |
|                 | Figure 1h human PDE4D staining, non-AAA vs AAA                                                         | Accept normality            | Accept constancy of variance (F test to compare variances) | Parametric: unpaired Student's t-test                                                                                                                                                                                                                                                                                            | Mean with SE |
|                 | Figure 1j mouse PDE4D staining, control vs AAA                                                         | Accept normality            | Reject constancy of variance (F test to compare variances) | Parametric: Welch's t-test                                                                                                                                                                                                                                                                                                       | Mean with SE |
| <b>Figure 2</b> |                                                                                                        |                             |                                                            |                                                                                                                                                                                                                                                                                                                                  |              |
|                 | Figure 2c SMC treated with Ang II- <i>Pde4d</i> mRNA                                                   | Accept normality            | Reject constancy of variance (F test to compare variances) | Parametric: Welch's t-test                                                                                                                                                                                                                                                                                                       | Mean with SE |
|                 | Figure 2e SMC treated with Ang II-PDE4D protein                                                        | Accept normality            | Accept constancy of variance (F test to compare variances) | Parametric: unpaired Student's t-test                                                                                                                                                                                                                                                                                            | Mean with SE |
| <b>Figure 3</b> |                                                                                                        |                             |                                                            |                                                                                                                                                                                                                                                                                                                                  |              |
|                 | Figure 3c <i>Apoe</i> <sup>-/-</sup> <i>Pde4d</i> <sup>SMC/-</sup> AAA model max diameter              | Accept normality            | Reject constancy of variance                               | Parametric: Welch ANOVA with Dunnett's T3 post-hoc test                                                                                                                                                                                                                                                                          | Mean with SE |
|                 | Figure 3e <i>Apoe</i> <sup>-/-</sup> <i>Pde4d</i> <sup>SMC/-</sup> AAA model elastin degradation       | Reject normality            | Accept constancy of variance                               | Non-parametric: Mann-Whitney test between <i>Apoe</i> <sup>-/-</sup> <i>Pde4d</i> <sup>flax/flax</sup> and Ang II <i>Apoe</i> <sup>-/-</sup> <i>Pde4d</i> <sup>flax/flax</sup> ; between Ang II <i>Apoe</i> <sup>-/-</sup> <i>Pde4d</i> <sup>flax/flax</sup> and Ang II <i>Apoe</i> <sup>-/-</sup> <i>Pde4d</i> <sup>SMC/-</sup> | Mean with SE |
| <b>Figure 4</b> |                                                                                                        |                             |                                                            |                                                                                                                                                                                                                                                                                                                                  |              |
|                 | Figure 4c rolipram AAA model max diameter                                                              | Reject normality            | Reject constancy of variance                               | Parametric: Welch's t-test between ctrl and Ang II. Non-parametric: Mann-Whitney test between AngII and Ang II+rolipram                                                                                                                                                                                                          | Mean with SE |
|                 | Figure 4e rolipram AAA model elastin degradation                                                       | Reject normality            | Accept constancy of variance                               | Non-parametric: Mann-Whitney test between ctrl and Ang II. Parametric: unpaired Student's t-test between AngII and Ang II+rolipram                                                                                                                                                                                               | Mean with SE |
| <b>Figure 5</b> |                                                                                                        |                             |                                                            |                                                                                                                                                                                                                                                                                                                                  |              |
|                 | Figure 5c SMC treated with Ang II, siPDE4D-cleaved caspase-3 protein                                   | Accept normality            | Accept constancy of variance                               | Parametric: two-way ANOVA with Holm-Sidak's post-hoc test                                                                                                                                                                                                                                                                        | Mean with SE |
|                 | Figure 5e SMC treated with Ang II, siPDE4D-annexin V/PI flow                                           | Accept normality            | Accept constancy of variance                               | Parametric: two-way ANOVA with Holm-Sidak's post-hoc test                                                                                                                                                                                                                                                                        | Mean with SE |
|                 | Figure 5g SMC treated with Ang II, rolipram-cleaved caspase-3 protein                                  | Accept normality            | Accept constancy of variance                               | Parametric: two-way ANOVA with Holm-Sidak's post-hoc test                                                                                                                                                                                                                                                                        | Mean with SE |
|                 | Figure 5i SMC treated with Ang II, rolipram-annexin V/PI flow                                          | Accept normality            | Accept constancy of variance                               | Parametric: two-way ANOVA with Holm-Sidak's post-hoc test                                                                                                                                                                                                                                                                        | Mean with SE |
| <b>Figure 6</b> |                                                                                                        |                             |                                                            |                                                                                                                                                                                                                                                                                                                                  |              |
|                 | Figure 6b <i>Apoe</i> <sup>-/-</sup> <i>Pde4d</i> <sup>SMC/-</sup> AAA model-cleaved caspase-3 protein | Accept normality            | Accept constancy of variance                               | Parametric: two-way ANOVA with Holm-Sidak's post-hoc test                                                                                                                                                                                                                                                                        | Mean with SE |
|                 | Figure 6c <i>Apoe</i> <sup>-/-</sup> <i>Pde4d</i> <sup>SMC/-</sup> AAA model-TUNEL staining            | Accept normality            | Reject constancy of variance                               | Parametric: Welch ANOVA with Dunnett's T3 post-hoc test                                                                                                                                                                                                                                                                          | Mean with SE |
|                 | Figure 6e rolipram AAA model-cleaved caspase-3 protein                                                 | Accept normality            | Accept constancy of variance                               | Parametric: two-way ANOVA with Holm-Sidak's post-hoc test                                                                                                                                                                                                                                                                        | Mean with SE |
|                 | Figure 6f rolipram AAA model-TUNEL staining                                                            | Reject normality            | Reject constancy of variance                               | Non-parametric: Mann-Whitney test between ctrl and Ang II. Non-parametric: Mann-Whitney test between AngII and Ang II+rolipram                                                                                                                                                                                                   | Mean with SE |
| <b>Figure 7</b> |                                                                                                        |                             |                                                            |                                                                                                                                                                                                                                                                                                                                  |              |
|                 | Figure 7b SMC treated with Ang II, siPDE4D, PKI-cleaved caspase3 protein                               | Accept normality            | Accept constancy of variance                               | Parametric: one-way ANOVA with Holm-Sidak's post-hoc test                                                                                                                                                                                                                                                                        | Mean with SE |
|                 | Figure 7d SMC treated with Ang II, siPDE4D, ESI-09-cleaved caspase3 protein                            | Accept normality            | Accept constancy of variance                               | Parametric: one-way ANOVA with Holm-Sidak's post-hoc test                                                                                                                                                                                                                                                                        | Mean with SE |
|                 | Figure 7f SMC treated with Ang II, siPDE4D, PKI-pBad protein                                           | Accept normality            | Accept constancy of variance                               | Parametric: one-way ANOVA with Holm-Sidak's post-hoc test                                                                                                                                                                                                                                                                        | Mean with SE |
|                 | Figure 7g SMC treated with Ang II, siPDE4D, PKI-pBad protein                                           | Accept normality            | Accept constancy of variance                               | Parametric: one-way ANOVA with Holm-Sidak's post-hoc test                                                                                                                                                                                                                                                                        | Mean with SE |
|                 | Figure 7h SMC treated with Ang II, siPDE4D, PKI-Bad protein                                            | Accept normality            | Accept constancy of variance                               | Parametric: one-way ANOVA with Holm-Sidak's post-hoc test                                                                                                                                                                                                                                                                        | Mean with SE |

**Supplementary Table 3. Statistics of each figure (continued)**

|                               | Supplemental Figures                                                                                                                                                                | Shapiro-Wilk normality test | Brown-Forsythe test                                        | Test                                                                                 | Plot         |
|-------------------------------|-------------------------------------------------------------------------------------------------------------------------------------------------------------------------------------|-----------------------------|------------------------------------------------------------|--------------------------------------------------------------------------------------|--------------|
| <b>Supplemental Figure 3</b>  |                                                                                                                                                                                     |                             |                                                            |                                                                                      |              |
|                               | Supplemental Figure 3b mouse <i>Pde4a</i> mRNA, <i>Apoe</i> <sup>-/-</sup> <i>Pde4d</i> <sup>fllox/fllox</sup> vs <i>Apoe</i> <sup>-/-</sup> <i>Pde4d</i> <sup>SMC/-</sup>          | Reject normality            | Accept constancy of variance (F test to compare variances) | Non-parametric: Mann-Whitney test                                                    | Mean with SE |
|                               | Supplemental Figure 3b mouse <i>Pde4b</i> mRNA, <i>Apoe</i> <sup>-/-</sup> <i>Pde4d</i> <sup>fllox/fllox</sup> vs <i>Apoe</i> <sup>-/-</sup> <i>Pde4d</i> <sup>SMC/-</sup>          | Accept normality            | Accept constancy of variance (F test to compare variances) | Parametric: unpaired Student's t-test                                                | Mean with SE |
|                               | Supplemental Figure 3b mouse <i>Pde4c</i> mRNA, <i>Apoe</i> <sup>-/-</sup> <i>Pde4d</i> <sup>fllox/fllox</sup> vs <i>Apoe</i> <sup>-/-</sup> <i>Pde4d</i> <sup>SMC/-</sup>          | Accept normality            | Accept constancy of variance (F test to compare variances) | Parametric: unpaired Student's t-test                                                | Mean with SE |
|                               | Supplemental Figure 3b mouse <i>Pde4d</i> mRNA, <i>Apoe</i> <sup>-/-</sup> <i>Pde4d</i> <sup>fllox/fllox</sup> vs <i>Apoe</i> <sup>-/-</sup> <i>Pde4d</i> <sup>SMC/-</sup>          | Reject normality            | Accept constancy of variance (F test to compare variances) | Non-parametric: Mann-Whitney test                                                    | Mean with SE |
| <b>Supplemental Figure 4</b>  |                                                                                                                                                                                     |                             |                                                            |                                                                                      |              |
|                               | Supplemental Figure 4b Systolic blood pressure in <i>Apoe</i> <sup>-/-</sup> <i>Pde4d</i> <sup>fllox/fllox</sup> and <i>Apoe</i> <sup>-/-</sup> <i>Pde4d</i> <sup>SMC/-</sup> mice  | Accept normality            | Accept constancy of variance                               | Parametric: two-way ANOVA with Holm-Sidak's post-hoc test                            | Mean with SE |
|                               | Supplemental Figure 4c Diastolic blood pressure in <i>Apoe</i> <sup>-/-</sup> <i>Pde4d</i> <sup>fllox/fllox</sup> and <i>Apoe</i> <sup>-/-</sup> <i>Pde4d</i> <sup>SMC/-</sup> mice | Reject normality            | Accept constancy of variance                               | Non-parametric: ANOVA Kruskal-Wallis test with post Dunn's multiple comparisons test | Mean with SE |
| <b>Supplemental Figure 5</b>  |                                                                                                                                                                                     |                             |                                                            |                                                                                      |              |
|                               | Supplemental Figure 5a <i>Apoe</i> <sup>-/-</sup> <i>Pde4d</i> <sup>SMC/-</sup> AAA model- <i>Mmp2</i> mRNA                                                                         | Accept normality            | Accept constancy of variance                               | Parametric: two-way ANOVA with Holm-Sidak's post-hoc test                            | Mean with SE |
|                               | Supplemental Figure 5b <i>Apoe</i> <sup>-/-</sup> <i>Pde4d</i> <sup>SMC/-</sup> AAA model- <i>Mmp9</i> mRNA                                                                         | Accept normality            | Accept constancy of variance                               | Parametric: two-way ANOVA with Holm-Sidak's post-hoc test                            | Mean with SE |
|                               | Supplemental Figure 5c rolipram AAA model- <i>Mmp2</i> mRNA                                                                                                                         | Accept normality            | Reject constancy of variance                               | Parametric: Welch ANOVA with Dunnett's T3 post-hoc test                              | Mean with SE |
|                               | Supplemental Figure 5d rolipram AAA model- <i>Mmp9</i> mRNA                                                                                                                         | Accept normality            | Reject constancy of variance                               | Parametric: Welch ANOVA with Dunnett's T3 post-hoc test                              | Mean with SE |
| <b>Supplemental Figure 6</b>  |                                                                                                                                                                                     |                             |                                                            |                                                                                      |              |
|                               | Supplemental Figure 6a <i>Apoe</i> <sup>-/-</sup> <i>Pde4d</i> <sup>SMC/-</sup> AAA mode-cAMP                                                                                       | Accept normality            | Accept constancy of variance                               | Parametric: two-way ANOVA with Holm-Sidak's post-hoc test                            | Mean with SE |
|                               | Supplemental Figure 6b rolipram AAA model-cAMP                                                                                                                                      | Accept normality            | Accept constancy of variance                               | Parametric: two-way ANOVA with Holm-Sidak's post-hoc test                            | Mean with SE |
|                               | Supplemental Figure 6c SMC treated with Ang II, siPDE4D-cAMP                                                                                                                        | Accept normality            | Accept constancy of variance                               | Parametric: two-way ANOVA with Holm-Sidak's post-hoc test                            | Mean with SE |
|                               | Supplemental Figure 6d SMC treated with Ang II, rolipram-cAMP                                                                                                                       | Accept normality            | Accept constancy of variance                               | Parametric: two-way ANOVA with Holm-Sidak's post-hoc test                            | Mean with SE |
| <b>Supplemental Figure 7</b>  |                                                                                                                                                                                     |                             |                                                            |                                                                                      |              |
|                               | Supplemental Figure 7b Systolic blood pressure in <i>Apoe</i> <sup>-/-</sup> mice with or without Ang II/rolipram                                                                   | Accept normality            | Accept constancy of variance                               | Parametric: two-way ANOVA with Holm-Sidak's post-hoc test                            | Mean with SE |
|                               | Supplemental Figure 7c Diastolic blood pressure in <i>Apoe</i> <sup>-/-</sup> mice with or without Ang II/rolipram                                                                  | Accept normality            | Accept constancy of variance                               | Parametric: two-way ANOVA with Holm-Sidak's post-hoc test                            | Mean with SE |
| <b>Supplemental Figure 9</b>  |                                                                                                                                                                                     |                             |                                                            |                                                                                      |              |
|                               | Supplemental Figure 9a SMC treated with siPDE4D-Pde4d mRNA                                                                                                                          | Accept normality            | Accept constancy of variance (F test to compare variances) | Parametric: unpaired Student's t-test                                                | Mean with SE |
|                               | Supplemental Figure 9c SMC treated with siPDE4D-PDE4D protein                                                                                                                       | Accept normality            | Accept constancy of variance (F test to compare variances) | Parametric: unpaired Student's t-test                                                | Mean with SE |
| <b>Supplemental Figure 10</b> |                                                                                                                                                                                     |                             |                                                            |                                                                                      |              |
|                               | Supplemental Figure 10b SMC treated with H2O2, siPDE4D-cleaved caspase-3 protein                                                                                                    | Accept normality            | Accept constancy of variance                               | Parametric: two-way ANOVA with Holm-Sidak's post-hoc test                            | Mean with SE |
|                               | Supplemental Figure 10d SMC treated with H2O2, siPDE4D-annexin V/PI flow                                                                                                            | Accept normality            | Accept constancy of variance                               | Parametric: two-way ANOVA with Holm-Sidak's post-hoc test                            | Mean with SE |
| <b>Supplemental Figure 11</b> |                                                                                                                                                                                     |                             |                                                            |                                                                                      |              |
|                               | Supplemental Figure 11b SMC treated with H2O2, rolipram-cleaved caspase-3 protein                                                                                                   | Accept normality            | Accept constancy of variance                               | Parametric: two-way ANOVA with Holm-Sidak's post-hoc test                            | Mean with SE |
|                               | Supplemental Figure 11d SMC treated with H2O2, rolipram-annexin V/PI flow                                                                                                           | Accept normality            | Accept constancy of variance                               | Parametric: two-way ANOVA with Holm-Sidak's post-hoc test                            | Mean with SE |
| <b>Supplemental Figure 17</b> |                                                                                                                                                                                     |                             |                                                            |                                                                                      |              |
|                               | Supplemental Figure 17b SMC treated with Ang II, siPDE4D-EdU staining                                                                                                               | Accept normality            | Accept constancy of variance                               | Parametric: two-way ANOVA with Holm-Sidak's post-hoc test                            | Mean with SE |
| <b>Supplemental Figure 18</b> |                                                                                                                                                                                     |                             |                                                            |                                                                                      |              |
|                               | Supplemental Figure 18 SMC treated with Ang II, siPDE4D- <i>Sm22</i> $\alpha$ mRNA                                                                                                  | Accept normality            | Accept constancy of variance                               | Parametric: two-way ANOVA with Holm-Sidak's post-hoc test                            | Mean with SE |
|                               | Supplemental Figure 18 SMC treated with Ang II, siPDE4D- <i>Cnn</i> mRNA                                                                                                            | Accept normality            | Accept constancy of variance                               | Parametric: two-way ANOVA with Holm-Sidak's post-hoc test                            | Mean with SE |
|                               | Supplemental Figure 18 SMC treated with Ang II, siPDE4D- <i>Opn</i> mRNA                                                                                                            | Accept normality            | Accept constancy of variance                               | Parametric: two-way ANOVA with Holm-Sidak's post-hoc test                            | Mean with SE |
| <b>Supplemental Figure 19</b> |                                                                                                                                                                                     |                             |                                                            |                                                                                      |              |
|                               | Supplemental Figure 19a SMC treated with Ang II, siPDE4D- <i>Mmp2</i> mRNA                                                                                                          | Accept normality            | Accept constancy of variance                               | Parametric: two-way ANOVA with Holm-Sidak's post-hoc test                            | Mean with SE |
|                               | Supplemental Figure 19b SMC treated with Ang II, siPDE4D- <i>Mmp9</i> mRNA                                                                                                          | Accept normality            | Accept constancy of variance                               | Parametric: two-way ANOVA with Holm-Sidak's post-hoc test                            | Mean with SE |
| <b>Supplemental Figure 20</b> |                                                                                                                                                                                     |                             |                                                            |                                                                                      |              |
|                               | Supplemental Figure 20a SMC treated with Ang II, siPDE4D- <i>Colla1</i> mRNA                                                                                                        | Accept normality            | Accept constancy of variance                               | Parametric: two-way ANOVA with Holm-Sidak's post-hoc test                            | Mean with SE |
|                               | Supplemental Figure 20b SMC treated with Ang II, siPDE4D- <i>Col3a1</i> mRNA                                                                                                        | Accept normality            | Accept constancy of variance                               | Parametric: two-way ANOVA with Holm-Sidak's post-hoc test                            | Mean with SE |
|                               | Supplemental Figure 20c SMC treated with Ang II, siPDE4D- <i>Fn</i> mRNA                                                                                                            | Accept normality            | Accept constancy of variance                               | Parametric: two-way ANOVA with Holm-Sidak's post-hoc test                            | Mean with SE |
| <b>Supplemental Figure 21</b> |                                                                                                                                                                                     |                             |                                                            |                                                                                      |              |
|                               | Supplemental Figure 21a SMC treated with Ang II, siPDE4D- <i>Tnf-<math>\alpha</math></i> mRNA                                                                                       | Accept normality            | Accept constancy of variance                               | Parametric: two-way ANOVA with Holm-Sidak's post-hoc test                            | Mean with SE |
|                               | Supplemental Figure 21b SMC treated with Ang II, siPDE4D- <i>Il-6</i> mRNA                                                                                                          | Accept normality            | Accept constancy of variance                               | Parametric: two-way ANOVA with Holm-Sidak's post-hoc test                            | Mean with SE |
|                               | Supplemental Figure 21c SMC treated with Ang II, siPDE4D- <i>Ccl2</i> mRNA                                                                                                          | Accept normality            | Accept constancy of variance                               | Parametric: two-way ANOVA with Holm-Sidak's post-hoc test                            | Mean with SE |

**Supplementary Dataset 1. RNA sequencing data.** List of genes upregulated in rat aortic smooth muscle cells (SMCs) with Ang II (100nM, 24h) stimulation (Supplementary Table 4) and list of genes downregulated in SMCs after PDE4D suppression (Supplementary Table 5). List of MetaCore pathways (based on their minimum FDR) enriched for both the up-regulated genes in Ang II (100 nM, 24h) stimulated SMCs (Supplementary Table 6) and the down-regulated genes in PDE4D siRNA (200 nM) treated SMCs Supplementary Table 7).

**Supplementary Table 4. The 1848 genes up-regulated under AngII.**

| Symbol             | Gene id             | A1A      | A2A      | A3A      | con1A    | con2A    | con3A    |
|--------------------|---------------------|----------|----------|----------|----------|----------|----------|
| Gtf2h2             | ENSRNOG00000018230  | 12.58204 | 8.702019 | 11.29785 | 10.46781 | 6.577485 | 9.178095 |
| Ldha               | ENSRNOG00000013009  | 937.6022 | 394.1554 | 1469.684 | 818.3751 | 277.1435 | 1350.952 |
| Gpr62              | ENSRNOG00000022567  | 0.174323 | 0.097022 | 0.096954 | 0.074483 | 0        | 0        |
| Srsf5              | ENSRNOG00000005513  | 150.3875 | 141.4785 | 160.7884 | 134.9432 | 126.5325 | 145.4476 |
| Exosc10            | ENSRNOG00000010719  | 30.39819 | 19.60395 | 25.13462 | 27.96985 | 17.24051 | 22.69231 |
| Tsr2               | ENSRNOG00000002556  | 25.09823 | 18.70887 | 19.2965  | 22.25717 | 15.97165 | 16.48866 |
| Tlhc2              | ENSRNOG00000006395  | 0.177958 | 0.11005  | 0.219946 | 0.063363 | 0        | 0.107338 |
| Tmem87a            | ENSRNOG00000008455  | 16.93313 | 14.72039 | 14.4749  | 15.43866 | 13.29584 | 13.01729 |
| Fam96a             | ENSRNOG00000017119  | 37.42143 | 26.50822 | 36.10881 | 32.36692 | 21.45005 | 30.76575 |
| Wdr73              | ENSRNOG00000010664  | 11.76358 | 10.12928 | 11.82456 | 9.78205  | 8.078354 | 9.902044 |
| Mettl16            | ENSRNOG00000002764  | 10.00159 | 8.747772 | 9.726619 | 9.321418 | 8.068791 | 9.000802 |
| Stk26              | ENSRNOG00000007879  | 0.033656 | 0.020813 | 0.010399 | 0.023967 | 0.0111   | 0        |
| Axl                | ENSRNOG00000020716  | 280.9993 | 216.2972 | 276.8463 | 260.6302 | 195.4885 | 257.6567 |
| Nfe2l2             | ENSRNOG00000001548  | 156.6745 | 147.0991 | 139.724  | 143.6589 | 133.6746 | 125.596  |
| Slc18b1            | ENSRNOG00000016371  | 7.707378 | 11.85556 | 8.864634 | 5.898861 | 10.14275 | 7.000275 |
| RGD1304810         | ENSRNOG00000011253  | 0.015074 | 0.013983 | 0.013973 | 0        | 0        | 0        |
| Lrrc1              | ENSRNOG00000005970  | 4.924686 | 4.767819 | 4.823156 | 4.381434 | 4.271193 | 4.306673 |
| Sec22a             | ENSRNOG00000043069  | 15.15745 | 13.08023 | 15.15734 | 12.87905 | 10.72482 | 12.65391 |
| Cldn12             | ENSRNOG00000039862  | 6.626955 | 7.018244 | 6.343011 | 6.156434 | 6.588653 | 5.907805 |
| Svbp               | ENSRNOG00000007404  | 28.11799 | 29.54117 | 33.3427  | 23.70932 | 25.56274 | 29.13047 |
| Cr1l               | ENSRNOG00000008193  | 47.87516 | 59.09034 | 63.39977 | 41.51639 | 52.23897 | 57.18674 |
| Nmd3               | ENSRNOG00000009310  | 33.67873 | 29.24819 | 35.2949  | 30.5634  | 25.86308 | 32.23062 |
| Ip6k1              | ENSRNOG00000019932  | 44.78013 | 63.74343 | 49.37313 | 42.43129 | 61.30201 | 47.18496 |
| Tigd5              | ENSRNOG00000008686  | 3.352602 | 3.579844 | 2.94198  | 3.040012 | 3.287534 | 2.615329 |
| Pold2              | ENSRNOG00000014098  | 17.66496 | 6.690335 | 12.05474 | 15.47944 | 4.742631 | 9.918632 |
| Sdhb               | ENSRNOG00000007967  | 88.12555 | 66.71187 | 79.69983 | 79.97255 | 57.77299 | 71.72319 |
| Stk11              | ENSRNOG00000014287  | 51.42993 | 45.65206 | 49.24693 | 48.6221  | 42.49868 | 46.14964 |
| Ddx23              | ENSRNOG00000060154  | 64.81726 | 41.61905 | 51.83169 | 59.21532 | 36.08238 | 46.83404 |
| Pmf1               | ENSRNOG00000019620  | 52.34522 | 18.39146 | 56.35487 | 47.41438 | 12.94741 | 51.49394 |
| Nabp1              | ENSRNOG00000015416  | 4.813148 | 3.012156 | 3.987929 | 3.838356 | 2.152713 | 3.05721  |
| Kdm4d              | ENSRNOG00000024726  | 0.193552 | 0.164579 | 0.134561 | 0.103374 | 0.063833 | 0.043779 |
| Parp3              | ENSRNOG00000012865  | 98.18061 | 76.78785 | 70.16209 | 91.99008 | 70.02144 | 64.20963 |
| Poldip3            | ENSRNOG00000022877  | 54.96015 | 48.8388  | 51.36084 | 51.67438 | 45.94997 | 48.16888 |
| Acot9              | ENSRNOG00000003782  | 44.28577 | 44.1936  | 54.8707  | 38.3039  | 38.52486 | 49.63896 |
| Gstk1              | ENSRNOG00000016484  | 6.127267 | 4.262779 | 4.223385 | 5.580025 | 3.769465 | 3.660198 |
| AABR0704999<br>4.1 | ENSRNOG00000047185  | 87.46388 | 80.1181  | 94.91417 | 79.09055 | 70.49664 | 85.78352 |
| Eipr1              | ENSRNOG00000009285  | 22.41028 | 17.66978 | 22.51927 | 20.34739 | 15.30841 | 20.21083 |
| Mpz                | ENSRNOG00000003171  | 0.020144 | 0.037372 | 0.018673 | 0        | 0.019931 | 0        |
| Tufm               | ENSRNOG00000018604  | 53.39393 | 44.14874 | 49.34619 | 50.66855 | 41.03525 | 46.5767  |
| Arfgap2            | ENSRNOG00000014429  | 51.07228 | 46.21406 | 57.92259 | 44.81751 | 40.40802 | 52.53401 |
| Zfp637             | ENSRNOG00000023065  | 29.23087 | 31.32923 | 28.89189 | 27.01295 | 29.38335 | 26.93001 |
| Oser1              | ENSRNOG00000008297  | 36.69207 | 31.62931 | 28.62251 | 34.64076 | 29.24379 | 26.3647  |
| Anks1a             | ENSRNOG00000000498  | 3.406357 | 3.484316 | 3.353371 | 2.954588 | 3.095884 | 2.938534 |
| Rbck1              | ENSRNOG00000006695  | 57.3464  | 59.21256 | 57.23268 | 50.82111 | 51.73902 | 50.62704 |
| Ctnna1             | ENSRNOG00000005796  | 142.7676 | 143.2354 | 167.2711 | 130.4762 | 132.4874 | 156.4377 |
| Mut                | ENSRNOG000000050843 | 9.22322  | 10.48054 | 8.426236 | 8.535252 | 9.748306 | 7.79903  |
| Txndc15            | ENSRNOG00000000133  | 51.52207 | 59.28813 | 57.80491 | 45.51494 | 53.90624 | 52.62247 |
| Zscan29            | ENSRNOG00000012419  | 3.04252  | 2.836035 | 2.847806 | 2.441421 | 2.320078 | 2.255869 |
| Ptcd1              | ENSRNOG00000000987  | 7.983751 | 6.706924 | 6.330507 | 6.710803 | 5.205894 | 4.936431 |
| Cdc25a             | ENSRNOG00000020737  | 10.38944 | 6.723722 | 8.286782 | 9.572679 | 6.008858 | 7.581421 |
| Lsp1               | ENSRNOG00000020300  | 23.82576 | 16.56868 | 28.91141 | 23.14234 | 15.9862  | 28.24603 |
| Ccdc191            | ENSRNOG00000057815  | 2.319378 | 1.754601 | 1.909923 | 2.164807 | 1.570685 | 1.741909 |
| Ifi27              | ENSRNOG00000009263  | 1794.736 | 1001.76  | 1245.358 | 1628.991 | 857.0245 | 1104.569 |

|                    |                    |          |          |          |          |          |          |
|--------------------|--------------------|----------|----------|----------|----------|----------|----------|
| Hars               | ENSRNOG00000028105 | 62.91966 | 46.48942 | 54.53082 | 55.61567 | 40.35092 | 47.49425 |
| Akr1b1             | ENSRNOG00000009513 | 223.4707 | 191.6221 | 187.7159 | 191.7621 | 153.6558 | 153.6625 |
| Rimkla             | ENSRNOG00000008625 | 0.131406 | 0.243786 | 0.121808 | 0        | 0.097508 | 0        |
| Eif2b1             | ENSRNOG00000001039 | 13.71705 | 12.39675 | 13.95532 | 11.54274 | 10.24042 | 12.13107 |
| St3gal4            | ENSRNOG00000009850 | 64.41165 | 60.3578  | 55.4301  | 59.14089 | 55.24777 | 49.33328 |
| Dnpep              | ENSRNOG00000019772 | 124.2291 | 122.1937 | 109.9354 | 112.1203 | 107.9556 | 97.85348 |
| AABR0701328<br>8.4 | ENSRNOG00000053387 | 5.17555  | 1.567636 | 2.545625 | 4.174501 | 0.627014 | 1.720117 |
| Thap7              | ENSRNOG00000037967 | 13.39561 | 10.53841 | 10.04202 | 11.7731  | 8.593292 | 8.130856 |
| Ifngr1             | ENSRNOG00000012074 | 96.88631 | 77.29374 | 68.05098 | 94.68194 | 75.41927 | 66.18683 |
| Tfg                | ENSRNOG00000001633 | 34.70578 | 34.25687 | 40.83759 | 31.587   | 31.06089 | 38.19427 |
| Haus8              | ENSRNOG00000052038 | 21.64327 | 8.030593 | 15.90748 | 18.93279 | 4.890905 | 13.30158 |
| Cript              | ENSRNOG00000015215 | 33.63668 | 35.34242 | 33.88159 | 29.92753 | 31.66895 | 29.50603 |
| Gtf2b              | ENSRNOG00000011135 | 47.68395 | 34.24699 | 43.26745 | 40.31078 | 25.94003 | 36.47824 |
| Cog7               | ENSRNOG00000060008 | 13.26754 | 11.61443 | 12.47151 | 12.24921 | 10.36945 | 11.37638 |
| LOC498122          | ENSRNOG00000048861 | 6.61392  | 6.428443 | 6.301812 | 5.995248 | 5.891956 | 5.793174 |
| Adss               | ENSRNOG00000004481 | 83.97166 | 60.97811 | 82.88312 | 77.54839 | 55.22111 | 77.65866 |
| Ap3s2              | ENSRNOG00000043141 | 49.80266 | 46.11298 | 49.11712 | 43.21929 | 39.55129 | 43.65909 |
| Lrrn4              | ENSRNOG00000032989 | 1.564548 | 0.881624 | 4.635448 | 1.405691 | 0.752271 | 4.484664 |
| Snx17              | ENSRNOG00000026884 | 60.02096 | 58.63746 | 59.34101 | 55.0922  | 52.557   | 53.72583 |
| Ggh                | ENSRNOG00000007351 | 8.769793 | 7.130941 | 8.077789 | 8.004024 | 6.507534 | 7.407121 |
| Rpl6               | ENSRNOG00000025936 | 559.5116 | 560.9447 | 570.6795 | 517.93   | 509.5887 | 524.772  |
| Slamf8             | ENSRNOG00000008736 | 3.478425 | 1.751198 | 2.866095 | 3.334482 | 1.632509 | 2.743608 |
| Pus1               | ENSRNOG00000037500 | 18.47991 | 16.36116 | 17.83249 | 15.64793 | 13.01521 | 14.33921 |
| Dync1i2            | ENSRNOG00000009781 | 35.89863 | 36.26317 | 42.23422 | 34.40763 | 34.4509  | 40.42718 |
| Isoc2b             | ENSRNOG00000016829 | 24.0257  | 15.28023 | 18.73684 | 20.8229  | 11.35157 | 14.87102 |
| Cers5              | ENSRNOG00000052990 | 57.54707 | 52.83017 | 58.10264 | 53.73556 | 48.17685 | 54.17657 |
| Nhp2               | ENSRNOG00000004247 | 129.3359 | 65.32104 | 139.017  | 111.414  | 45.01583 | 116.6077 |
| Nod1               | ENSRNOG00000010629 | 28.84065 | 21.9599  | 32.76106 | 26.38371 | 18.88527 | 29.94658 |
| Pex16              | ENSRNOG00000006539 | 20.05648 | 20.51209 | 18.93811 | 16.57423 | 16.59359 | 15.8022  |
| AABR0701103<br>1.1 | ENSRNOG00000059120 | 8.384761 | 6.988727 | 11.71482 | 4.802702 | 2.524799 | 7.805937 |
| Med29              | ENSRNOG00000019702 | 58.78064 | 45.83921 | 59.68674 | 50.55722 | 37.47166 | 49.6583  |
| Acox3              | ENSRNOG00000008474 | 8.178592 | 12.35329 | 9.808623 | 7.545574 | 11.58629 | 9.023488 |
| Bola1              | ENSRNOG00000021185 | 26.62667 | 26.8002  | 23.28211 | 21.55996 | 20.51749 | 17.94248 |
| LOC10091248<br>9   | ENSRNOG00000058444 | 1623.519 | 375.4371 | 889.9091 | 1495.605 | 250.5285 | 736.5025 |
| Zbtb8os            | ENSRNOG00000008226 | 32.52415 | 22.68607 | 28.84518 | 29.05383 | 18.51829 | 25.4636  |
| Bcl7b              | ENSRNOG00000032705 | 19.0184  | 18.91252 | 20.75046 | 16.96635 | 17.18532 | 19.09761 |
| Ppox               | ENSRNOG00000003567 | 12.08717 | 11.55893 | 12.80218 | 10.55968 | 9.719158 | 10.87941 |
| Plin2              | ENSRNOG00000007060 | 57.57536 | 47.52735 | 45.95958 | 51.96926 | 40.42625 | 39.28734 |
| RGD1311739         | ENSRNOG00000021245 | 9.524055 | 9.457401 | 8.667054 | 7.889    | 7.528534 | 7.131937 |
| LOC10091157<br>6   | ENSRNOG00000050800 | 96.33952 | 71.5003  | 115.6623 | 84.65933 | 56.61045 | 102.1119 |
| Stard5             | ENSRNOG00000025052 | 27.42775 | 18.66149 | 26.4379  | 25.26003 | 15.91727 | 24.08021 |
| Cox6b2             | ENSRNOG00000038616 | 0.479351 | 0.518758 | 0.592451 | 0        | 0.079044 | 0.216845 |
| Cep44              | ENSRNOG00000010566 | 12.62055 | 9.945319 | 13.7488  | 11.06722 | 8.728728 | 12.35357 |
| Snrpd2             | ENSRNOG00000015844 | 95.18648 | 78.88509 | 94.4909  | 80.95208 | 60.78463 | 78.7324  |
| Nutf2              | ENSRNOG00000018945 | 53.31316 | 36.27693 | 53.5735  | 47.4773  | 31.52114 | 48.81648 |
| Sgce               | ENSRNOG00000046905 | 41.86463 | 43.9307  | 38.51812 | 39.8952  | 41.59636 | 36.00502 |
| Nln                | ENSRNOG00000011561 | 24.19236 | 24.24963 | 25.09476 | 22.95708 | 22.72717 | 23.54035 |
| Rab5c              | ENSRNOG00000018568 | 110.4446 | 82.83256 | 95.97318 | 100.8823 | 71.03196 | 83.88898 |
| Ints14             | ENSRNOG00000012469 | 11.67202 | 10.93457 | 14.47202 | 9.815047 | 9.17299  | 12.2528  |
| Ddx49              | ENSRNOG00000022368 | 69.378   | 51.55471 | 58.32723 | 63.57535 | 45.07842 | 50.888   |
| RGD1561590         | ENSRNOG00000020771 | 121.0399 | 77.71522 | 123.533  | 110.2033 | 69.29054 | 113.8956 |
| Ccm2               | ENSRNOG00000060825 | 31.88563 | 26.56536 | 34.40403 | 26.96119 | 21.21825 | 30.24886 |

|                |                     |          |          |          |          |          |          |
|----------------|---------------------|----------|----------|----------|----------|----------|----------|
| Ncoa4          | ENSRNOG00000019768  | 69.821   | 59.92167 | 61.16808 | 63.34169 | 54.79124 | 54.77029 |
| Thns11         | ENSRNOG00000033076  | 0.970735 | 1.278917 | 0.938955 | 0.586082 | 0.904754 | 0.636424 |
| Alg6           | ENSRNOG00000009045  | 9.214817 | 8.227775 | 10.0948  | 8.237621 | 7.459374 | 9.273284 |
| Eif3k          | ENSRNOG00000020495  | 164.6578 | 147.2872 | 152.2061 | 146.102  | 124.1102 | 133.3253 |
| Ddx21          | ENSRNOG00000043099  | 69.68024 | 52.73941 | 66.36285 | 61.20752 | 44.67403 | 59.76956 |
| Bdh1           | ENSRNOG00000001736  | 6.609713 | 10.64492 | 11.63809 | 5.53473  | 9.3657   | 10.63795 |
| LOC100909548   | ENSRNOG00000014992  | 31.54392 | 24.60813 | 32.05381 | 28.77772 | 22.18263 | 29.92728 |
| Ccng1          | ENSRNOG00000003256  | 168.6639 | 236.0093 | 180.3943 | 152.8949 | 221.4126 | 161.6281 |
| Tomm22         | ENSRNOG00000014058  | 78.37929 | 70.43961 | 82.58946 | 65.4206  | 59.51311 | 72.52925 |
| Uxt            | ENSRNOG00000009893  | 45.27354 | 32.11079 | 55.09375 | 39.49787 | 25.4747  | 47.56125 |
| LOC103691744   | ENSRNOG00000057089  | 1.552361 | 1.210421 | 1.689232 | 0.961272 | 0.756813 | 1.139874 |
| Hsd17b4        | ENSRNOG00000015840  | 35.66395 | 43.61368 | 35.91501 | 31.88888 | 40.64435 | 32.83948 |
| Cmc2           | ENSRNOG00000011279  | 45.84125 | 34.83092 | 53.37    | 41.78027 | 29.72049 | 49.25986 |
| Sumo2          | ENSRNOG00000003670  | 337.8106 | 222.1846 | 336.5852 | 298.918  | 175.7159 | 300.6252 |
| Pdcd5          | ENSRNOG00000013250  | 51.49434 | 34.83092 | 56.47451 | 44.68771 | 28.10328 | 47.98525 |
| Brms11         | ENSRNOG000000051077 | 0.36693  | 0.267431 | 0.194359 | 0.307957 | 0.216092 | 0.126467 |
| Eif2s1         | ENSRNOG00000009432  | 126.6363 | 75.47963 | 121.431  | 114.7346 | 59.67839 | 107.468  |
| Poll           | ENSRNOG00000016748  | 15.88681 | 17.66588 | 14.45343 | 13.92894 | 15.75056 | 12.00503 |
| LOC691716      | ENSRNOG00000054854  | 22.9793  | 21.22509 | 21.30087 | 20.15898 | 18.96229 | 18.3132  |
| Minpp1         | ENSRNOG00000011287  | 36.34757 | 34.25896 | 36.47723 | 32.44189 | 29.15736 | 32.27013 |
| Snrpa          | ENSRNOG00000001501  | 37.7787  | 15.11875 | 41.09905 | 31.70192 | 7.332784 | 34.89209 |
| Preli3b        | ENSRNOG00000046644  | 58.23949 | 40.04371 | 54.39999 | 52.66019 | 32.60155 | 47.72302 |
| Tmlhe          | ENSRNOG00000000729  | 9.261452 | 8.964525 | 11.7577  | 7.903527 | 7.943059 | 10.49681 |
| AABR07053687.1 | ENSRNOG00000015756  | 16.53024 | 13.09074 | 13.27019 | 14.15388 | 10.57555 | 11.37103 |
| Lsm4           | ENSRNOG00000019572  | 65.12366 | 37.50728 | 82.79444 | 58.77672 | 29.15772 | 74.69435 |
| Psmf1          | ENSRNOG00000009640  | 35.02597 | 20.15864 | 24.09295 | 33.09577 | 18.11897 | 22.55821 |
| Gpd1           | ENSRNOG00000056457  | 0.143866 | 0.24264  | 0.157605 | 0.027941 | 0.142339 | 0.070998 |
| Nit1           | ENSRNOG00000003881  | 92.93482 | 89.63727 | 69.71386 | 83.35481 | 78.65922 | 61.52409 |
| Cers2          | ENSRNOG00000021138  | 45.79911 | 39.37352 | 40.31315 | 43.45272 | 37.48096 | 37.77359 |
| Utp4           | ENSRNOG00000020333  | 24.54562 | 18.23963 | 20.2743  | 22.7598  | 15.83953 | 18.0755  |
| Pnp            | ENSRNOG00000009982  | 285.1357 | 282.354  | 321.7384 | 252.7894 | 240.0576 | 287.8833 |
| Ccdc175        | ENSRNOG00000004774  | 1.917758 | 2.088308 | 2.0482   | 1.232069 | 1.429927 | 1.533909 |
| LOC100912034   | ENSRNOG00000047914  | 28.60476 | 25.97288 | 31.36192 | 27.50863 | 25.09483 | 30.18024 |
| Usp47          | ENSRNOG00000026754  | 35.67595 | 33.92566 | 39.99745 | 34.39318 | 32.64043 | 39.02106 |
| Fam131a        | ENSRNOG00000045653  | 4.91715  | 5.20728  | 5.07836  | 4.130833 | 4.618113 | 4.31708  |
| Manbal         | ENSRNOG00000031453  | 58.52535 | 59.49879 | 62.38177 | 52.03437 | 50.97489 | 55.58536 |
| Gsto2          | ENSRNOG00000012801  | 0.409784 | 0.880276 | 0.539791 | 0.230379 | 0.746853 | 0.390262 |
| Mrrpl46        | ENSRNOG00000018547  | 13.5917  | 10.89154 | 11.56553 | 10.97108 | 8.730276 | 8.627209 |
| Cxcl16         | ENSRNOG00000026647  | 136.5424 | 117.2402 | 76.2273  | 120.9858 | 100.9712 | 64.11902 |
| Ap1s2          | ENSRNOG00000038686  | 4.404441 | 6.454291 | 5.020019 | 3.386661 | 5.47679  | 3.7368   |
| Ssh3           | ENSRNOG00000018878  | 26.17528 | 29.27666 | 22.90176 | 24.61237 | 27.43387 | 21.5428  |
| Ift88          | ENSRNOG00000009278  | 2.867083 | 4.011645 | 2.869835 | 2.534964 | 3.718636 | 2.62667  |
| Oit3           | ENSRNOG00000046365  | 0.131406 | 0.060946 | 0.15226  | 0.087728 | 0.016251 | 0.118888 |
| Nsg1           | ENSRNOG00000005700  | 8.011109 | 10.27762 | 27.48912 | 6.105184 | 7.694324 | 25.02889 |
| AABR07018321.1 | ENSRNOG00000016777  | 34.36737 | 34.22499 | 31.38837 | 31.48853 | 31.43834 | 27.71928 |
| Txndc17        | ENSRNOG00000014072  | 39.60447 | 37.32408 | 44.13711 | 35.15524 | 31.28472 | 39.14565 |
| Trap1          | ENSRNOG00000005418  | 50.65355 | 35.20494 | 49.67911 | 45.58255 | 29.13871 | 42.7124  |
| LOC103689947   | ENSRNOG00000053812  | 43.99094 | 48.06355 | 27.39867 | 40.92679 | 44.42925 | 24.74861 |
| Nol3           | ENSRNOG00000015588  | 42.23659 | 55.30616 | 43.74954 | 36.55911 | 48.14365 | 38.39276 |
| Smg9           | ENSRNOG00000019596  | 16.73165 | 18.17862 | 16.53781 | 14.94956 | 16.20652 | 14.1175  |

|                    |                    |          |          |          |          |          |          |
|--------------------|--------------------|----------|----------|----------|----------|----------|----------|
| Mccc2              | ENSRNOG00000017752 | 19.86504 | 20.18343 | 15.64021 | 18.79943 | 19.21929 | 14.86767 |
| Vasp               | ENSRNOG00000016367 | 53.8454  | 56.61264 | 48.85474 | 49.99348 | 51.31582 | 43.95754 |
| Toe1               | ENSRNOG00000017561 | 10.52815 | 8.975592 | 10.25063 | 9.142357 | 7.45635  | 9.14837  |
| LOC10091248<br>1   | ENSRNOG00000046950 | 83.22396 | 52.2067  | 86.23137 | 74.3525  | 41.90656 | 78.77863 |
| LOC10036102<br>5   | ENSRNOG00000004090 | 7.566106 | 4.00222  | 7.158377 | 6.111538 | 2.691176 | 6.109926 |
| Spes1              | ENSRNOG00000018075 | 102.1457 | 83.14092 | 106.6049 | 91.5274  | 71.0781  | 97.92249 |
| Rai14              | ENSRNOG00000028872 | 20.53419 | 22.05367 | 20.67283 | 19.39965 | 21.12764 | 19.38497 |
| Tcaf2              | ENSRNOG00000030222 | 0.906447 | 0.77737  | 0.753045 | 0.703347 | 0.575323 | 0.487419 |
| Plaur              | ENSRNOG00000037931 | 42.82434 | 27.21909 | 37.21751 | 37.29164 | 23.23272 | 32.58028 |
| Ecsit              | ENSRNOG00000014128 | 15.01461 | 11.25919 | 12.56122 | 13.181   | 9.737055 | 10.4337  |
| Tef                | ENSRNOG00000019383 | 24.88544 | 20.42332 | 19.00438 | 23.89394 | 19.67742 | 17.97766 |
| Acad9              | ENSRNOG00000014178 | 23.23052 | 18.33691 | 22.05992 | 20.7215  | 15.13543 | 19.69521 |
| C1d                | ENSRNOG00000005982 | 9.095109 | 8.74798  | 10.45805 | 7.688084 | 7.418673 | 8.657968 |
| Lrrc41             | ENSRNOG00000013642 | 45.5854  | 36.48223 | 42.39724 | 41.45372 | 31.60255 | 36.61832 |
| Cacybp             | ENSRNOG00000002572 | 53.82837 | 41.23968 | 54.88479 | 46.67301 | 31.67543 | 47.54896 |
| Timm50             | ENSRNOG00000037638 | 25.46261 | 18.51026 | 23.13681 | 23.18294 | 15.43978 | 20.76306 |
| Mrps28             | ENSRNOG00000032630 | 14.67885 | 11.78594 | 16.1285  | 11.6559  | 9.051024 | 12.36095 |
| Cdca7              | ENSRNOG00000001514 | 16.61509 | 4.140843 | 12.26444 | 14.54599 | 2.120614 | 10.76033 |
| Dpm2               | ENSRNOG00000049110 | 59.22986 | 40.56475 | 48.87451 | 50.06241 | 33.77328 | 41.77677 |
| Phkg1              | ENSRNOG00000000920 | 1.003595 | 1.203415 | 0.884912 | 0.810548 | 0.944507 | 0.686533 |
| P2ry6              | ENSRNOG00000019270 | 17.09134 | 16.17907 | 34.77828 | 14.18868 | 12.29813 | 30.76114 |
| Dnaja1             | ENSRNOG00000007029 | 112.5308 | 96.05544 | 111.77   | 101.9667 | 85.79252 | 97.9922  |
| Atrip              | ENSRNOG00000020670 | 6.965104 | 6.539843 | 7.034941 | 5.803464 | 5.333295 | 5.4674   |
| Gorasp1            | ENSRNOG00000018047 | 20.78021 | 23.43044 | 19.22047 | 17.17119 | 19.50034 | 16.42678 |
| Pef1               | ENSRNOG00000013972 | 57.79886 | 55.00382 | 60.84926 | 50.23182 | 44.55862 | 52.55599 |
| Esm1               | ENSRNOG00000010797 | 132.1218 | 97.39192 | 100.0147 | 114.9928 | 85.0036  | 86.4551  |
| Aldh16a1           | ENSRNOG00000020623 | 29.64305 | 29.87037 | 34.89568 | 25.15035 | 23.72348 | 28.71636 |
| Uri1               | ENSRNOG00000014463 | 19.29673 | 15.12282 | 18.01635 | 18.4928  | 14.38495 | 16.99666 |
| Slc35b4            | ENSRNOG00000008851 | 20.10154 | 24.63744 | 24.30306 | 17.26395 | 20.90363 | 21.53519 |
| AABR0704505<br>8.1 | ENSRNOG00000033891 | 21.2364  | 16.40052 | 21.73679 | 17.58423 | 12.44914 | 18.9435  |
| Comtd1             | ENSRNOG00000013968 | 21.93078 | 32.4012  | 17.75012 | 18.59475 | 28.5712  | 13.05609 |
| Aifm2              | ENSRNOG00000059445 | 19.34616 | 16.457   | 20.82685 | 17.17785 | 13.46383 | 18.48786 |
| Phf5a              | ENSRNOG00000024170 | 59.01195 | 38.14245 | 49.31921 | 51.08966 | 30.25668 | 43.58419 |
| Arl6ip5            | ENSRNOG00000006818 | 118.18   | 97.76214 | 104.7278 | 106.3762 | 83.00559 | 94.17608 |
| Dph3               | ENSRNOG00000019727 | 7.794749 | 7.155271 | 8.782151 | 6.891038 | 6.222326 | 7.555226 |
| Cdc6               | ENSRNOG00000027787 | 21.26143 | 5.241767 | 12.92977 | 18.174   | 2.338661 | 10.74862 |
| Pno1               | ENSRNOG00000005524 | 20.47458 | 13.02994 | 17.18471 | 18.66277 | 10.82843 | 14.59485 |
| AABR0703601<br>9.1 | ENSRNOG00000051442 | 2.008178 | 2.03854  | 1.767839 | 1.537986 | 1.674464 | 1.428369 |
| RGD735065          | ENSRNOG00000000524 | 14.41845 | 11.38874 | 14.80715 | 13.2919  | 10.20194 | 13.97    |
| B3galt6            | ENSRNOG00000019979 | 8.890907 | 10.13796 | 8.632408 | 8.258299 | 9.49192  | 7.773731 |
| Stip1              | ENSRNOG00000021164 | 103.9974 | 59.15122 | 96.16938 | 97.20862 | 49.40447 | 87.72005 |
| Rangrf             | ENSRNOG00000004980 | 22.25135 | 15.97978 | 13.05764 | 20.46185 | 13.44879 | 10.63411 |
| Tmem129            | ENSRNOG00000017329 | 24.2899  | 18.6796  | 24.74503 | 22.19528 | 16.35452 | 21.80205 |
| Lrrc8e             | ENSRNOG00000028460 | 7.818041 | 8.112105 | 9.302644 | 6.838748 | 6.755783 | 8.263537 |
| Pla2g5             | ENSRNOG00000016838 | 2.715748 | 4.288804 | 1.872437 | 2.109741 | 3.863841 | 1.299599 |
| B4galt1            | ENSRNOG00000059461 | 38.09001 | 31.01487 | 37.13101 | 36.64262 | 28.96158 | 35.15861 |
| Rnf167             | ENSRNOG00000003879 | 20.50155 | 17.40609 | 17.93687 | 17.82145 | 13.54928 | 14.43686 |
| Loxl3              | ENSRNOG00000061373 | 111.3324 | 59.82684 | 103.9624 | 101.3763 | 48.72097 | 89.91298 |
| St6galnac4         | ENSRNOG00000048870 | 24.48857 | 21.94101 | 22.77029 | 20.99406 | 19.45805 | 20.02615 |
| Mdp1               | ENSRNOG00000019840 | 12.82021 | 7.866824 | 14.23486 | 11.34483 | 6.038199 | 12.10096 |
| Acp6               | ENSRNOG00000017494 | 17.0226  | 16.86642 | 15.05503 | 16.36227 | 16.02208 | 14.45858 |
| Wdr18              | ENSRNOG00000012379 | 30.98644 | 19.64644 | 25.52593 | 28.77735 | 16.47244 | 22.95746 |

|                |                    |          |          |          |          |          |          |
|----------------|--------------------|----------|----------|----------|----------|----------|----------|
| Mapkapk5       | ENSRNOG00000001345 | 25.84165 | 20.93014 | 25.74972 | 23.39695 | 18.04879 | 23.76522 |
| Eapp           | ENSRNOG00000004509 | 38.56487 | 26.44232 | 30.82777 | 35.59416 | 22.30333 | 26.62054 |
| Gnpda2         | ENSRNOG00000002177 | 5.789516 | 5.830726 | 4.734147 | 4.682335 | 4.725656 | 3.947224 |
| Epha2          | ENSRNOG00000009222 | 26.12031 | 20.7045  | 25.35993 | 24.35449 | 19.29211 | 24.12703 |
| Plekhf2        | ENSRNOG00000026662 | 15.26463 | 14.59942 | 16.11526 | 14.82811 | 14.12531 | 15.78861 |
| Atp6v1h        | ENSRNOG00000030862 | 38.59871 | 40.06814 | 36.73556 | 35.27664 | 37.32965 | 34.44711 |
| RGD1565784     | ENSRNOG00000029415 | 11.22986 | 9.992144 | 11.60217 | 9.456607 | 7.421492 | 9.509093 |
| Atp1b3         | ENSRNOG00000011501 | 149.2672 | 174.4036 | 158.7545 | 137.3371 | 159.0855 | 141.2897 |
| Usp39          | ENSRNOG00000010930 | 17.70422 | 12.75971 | 16.86695 | 16.5473  | 11.06218 | 15.38962 |
| Thap3          | ENSRNOG00000026840 | 20.52979 | 19.97399 | 18.88501 | 17.37613 | 16.68366 | 14.4907  |
| Cd82           | ENSRNOG00000000047 | 112.3155 | 115.3269 | 126.2265 | 100.2948 | 106.3411 | 113.0847 |
| Triobp         | ENSRNOG00000059015 | 10.63681 | 8.70901  | 10.17217 | 10.25291 | 8.163408 | 9.628572 |
| LOC100363116   | ENSRNOG00000052273 | 10.45069 | 8.435612 | 10.43516 | 8.852194 | 7.147139 | 8.542844 |
| LOC108348189   | ENSRNOG00000004484 | 25.69335 | 23.44637 | 24.23565 | 22.17139 | 20.53603 | 21.83036 |
| Rab21          | ENSRNOG00000003923 | 31.75093 | 31.3079  | 29.15017 | 29.42593 | 29.40985 | 27.55813 |
| Mpzl3          | ENSRNOG00000026753 | 4.119714 | 3.860378 | 4.304659 | 3.751126 | 3.505557 | 4.049743 |
| Slc24a4        | ENSRNOG00000006729 | 0.21663  | 0.334913 | 0.312366 | 0.167121 | 0.273867 | 0.239548 |
| B3galnt1       | ENSRNOG00000012019 | 43.73441 | 32.52484 | 43.3791  | 40.30025 | 27.46941 | 39.19052 |
| Rtel1          | ENSRNOG00000027513 | 19.92736 | 20.33725 | 22.46812 | 18.18228 | 18.67282 | 21.2705  |
| Slc25a3        | ENSRNOG00000008289 | 347.0821 | 337.217  | 373.9524 | 323.7471 | 302.7561 | 342.8011 |
| Scfd2          | ENSRNOG00000026828 | 7.332938 | 7.279438 | 6.454486 | 6.493029 | 6.634605 | 5.499587 |
| Ube2t          | ENSRNOG00000005038 | 34.37426 | 13.64919 | 37.74951 | 27.84808 | 9.061124 | 31.1551  |
| LOC100359574   | ENSRNOG00000025154 | 120.1185 | 78.66207 | 105.229  | 104.0555 | 60.09375 | 92.69966 |
| Ankrd46        | ENSRNOG00000025504 | 35.28513 | 33.49306 | 31.41759 | 32.94353 | 30.28131 | 27.97899 |
| Cmtm6          | ENSRNOG00000010951 | 46.00751 | 43.31921 | 57.53666 | 40.46651 | 38.08679 | 53.75644 |
| Nit2           | ENSRNOG00000027797 | 73.71029 | 94.56526 | 73.74378 | 61.29506 | 85.28739 | 64.97041 |
| Hspe1          | ENSRNOG00000051624 | 349.6149 | 278.5169 | 362.405  | 326.5808 | 250.1753 | 328.2718 |
| Zfp512         | ENSRNOG00000039815 | 10.16233 | 9.052924 | 9.264448 | 9.575962 | 8.548516 | 8.525989 |
| RGD1310852     | ENSRNOG00000006370 | 3.747144 | 3.091454 | 2.977242 | 3.227907 | 2.366226 | 2.445007 |
| AABR07053500.2 | ENSRNOG00000060434 | 1.072833 | 0.884595 | 0.662981 | 0.636652 | 0.235877 | 0.107849 |
| AABR07071891.4 | ENSRNOG00000049295 | 8.58682  | 4.995131 | 6.070905 | 7.617611 | 4.031849 | 5.398702 |
| Tut1           | ENSRNOG00000020047 | 14.61917 | 12.11616 | 12.75066 | 13.1693  | 10.19084 | 11.40305 |
| RGD1560212     | ENSRNOG00000057774 | 51.73989 | 43.69013 | 52.5543  | 47.51973 | 37.39575 | 46.93356 |
| Galnt12        | ENSRNOG00000008099 | 11.43738 | 9.32828  | 12.12227 | 10.7649  | 8.390913 | 11.44125 |
| Hmgb1          | ENSRNOG00000058908 | 18.85065 | 14.12997 | 27.17447 | 15.3321  | 9.919095 | 24.35116 |
| Soat1          | ENSRNOG00000004111 | 71.48188 | 47.71407 | 68.77498 | 67.21143 | 42.42249 | 62.41021 |
| LOC103689999   | ENSRNOG00000037984 | 40.14082 | 40.79448 | 44.86298 | 33.60662 | 32.34031 | 39.0618  |
| Plaa           | ENSRNOG00000007753 | 36.4341  | 32.12874 | 38.28201 | 33.79642 | 29.6212  | 36.49439 |
| Stx1a          | ENSRNOG00000029165 | 1.201155 | 1.404863 | 1.387743 | 0.873957 | 1.171183 | 1.149735 |
| Polr1c         | ENSRNOG00000019079 | 42.31684 | 42.86479 | 48.0649  | 38.93381 | 38.37873 | 44.97312 |
| AABR07055527.1 | ENSRNOG00000039997 | 1.564548 | 2.293972 | 2.152016 | 1.347751 | 1.997345 | 1.826469 |
| Med8           | ENSRNOG00000028477 | 32.68166 | 31.60583 | 36.79393 | 28.34868 | 25.28305 | 30.51218 |
| AABR07043200.1 | ENSRNOG00000058276 | 0.715222 | 0.442297 | 0.441988 | 0.381991 | 0.117938 | 0.215697 |
| Psm4           | ENSRNOG00000013493 | 35.44547 | 26.54421 | 36.53394 | 31.80815 | 21.1366  | 31.37377 |
| Stx5           | ENSRNOG00000018847 | 40.48465 | 44.31245 | 43.53752 | 36.22899 | 40.18033 | 37.67908 |
| Txndc12        | ENSRNOG00000008090 | 97.28062 | 77.00213 | 92.91993 | 77.76412 | 60.15822 | 80.02317 |
| Dpp8           | ENSRNOG00000019105 | 47.78799 | 45.37554 | 56.39479 | 44.75938 | 41.50778 | 51.81554 |
| Opal           | ENSRNOG00000001717 | 32.92932 | 31.96325 | 38.23029 | 30.21475 | 30.0023  | 35.28177 |



|                |                    |          |          |          |          |          |          |
|----------------|--------------------|----------|----------|----------|----------|----------|----------|
| Ddx39a         | ENSRNOG00000004373 | 55.8333  | 34.95108 | 72.39208 | 50.30929 | 26.8788  | 66.28704 |
| Rpp40          | ENSRNOG00000016226 | 8.648346 | 9.012373 | 8.879215 | 7.893181 | 8.502399 | 8.146423 |
| Akt1           | ENSRNOG00000028629 | 139.0468 | 126.705  | 173.7159 | 129.5333 | 114.4017 | 159.2962 |
| Arpc5          | ENSRNOG00000028062 | 73.62293 | 73.88318 | 84.27146 | 66.16773 | 62.56187 | 74.50598 |
| Cops7a         | ENSRNOG00000016778 | 46.53632 | 43.68955 | 43.41441 | 39.75211 | 39.2213  | 37.6321  |
| Sdcbp          | ENSRNOG00000009683 | 138.2616 | 123.5518 | 173.7603 | 125.5443 | 108.309  | 163.715  |
| Higd1a         | ENSRNOG00000019428 | 65.46462 | 25.48325 | 107.6399 | 55.42629 | 16.28386 | 101.003  |
| Lamc2          | ENSRNOG00000002667 | 1.143829 | 0.597589 | 0.572796 | 0.884759 | 0.260158 | 0.344957 |
| Dcaf4          | ENSRNOG00000008399 | 10.06013 | 7.954465 | 8.499467 | 9.021068 | 7.015093 | 7.120249 |
| Psmb2          | ENSRNOG00000011463 | 157.3326 | 101.8922 | 146.1165 | 142.5142 | 80.6891  | 130.7396 |
| Syngn4         | ENSRNOG00000021093 | 0.494377 | 0.349401 | 0.305512 | 0.402348 | 0.209627 | 0.191693 |
| Psmg2          | ENSRNOG00000017729 | 25.09582 | 16.58197 | 21.39242 | 23.20331 | 13.78721 | 19.28236 |
| Sumo4          | ENSRNOG00000032840 | 31.35392 | 21.34007 | 30.63954 | 27.39844 | 16.07119 | 24.57354 |
| Nudcd2         | ENSRNOG00000060914 | 37.88419 | 30.94601 | 45.56571 | 32.41446 | 23.72525 | 40.70616 |
| Casp3          | ENSRNOG00000010475 | 37.90022 | 29.13903 | 35.0612  | 34.22313 | 26.73032 | 32.06655 |
| Fam35a         | ENSRNOG00000059057 | 5.754573 | 8.511934 | 5.241574 | 4.687301 | 7.540035 | 4.543044 |
| Psmb10         | ENSRNOG00000019494 | 118.3024 | 49.79842 | 85.51361 | 105.7896 | 41.25359 | 76.30128 |
| Dnajb6         | ENSRNOG00000010353 | 40.01767 | 33.66467 | 39.83776 | 37.505   | 29.82364 | 36.28893 |
| Map3k6         | ENSRNOG00000008936 | 4.802898 | 4.663923 | 5.952164 | 4.520242 | 4.477937 | 5.684237 |
| Phpt1          | ENSRNOG00000016723 | 85.74215 | 66.09646 | 91.70285 | 79.46014 | 56.39872 | 83.35256 |
| Slc47a1        | ENSRNOG00000057404 | 8.455284 | 3.20858  | 5.272636 | 6.979058 | 2.072373 | 4.294351 |
| Nop56          | ENSRNOG00000007128 | 73.04944 | 36.29286 | 53.79854 | 66.75022 | 26.87864 | 46.69857 |
| Mtif2          | ENSRNOG00000004161 | 7.441661 | 8.167613 | 8.451508 | 5.719029 | 6.870895 | 7.298138 |
| LOC103693210   | ENSRNOG00000013238 | 18.77457 | 20.69896 | 19.71941 | 17.20019 | 18.40363 | 17.33153 |
| Gys1           | ENSRNOG00000020812 | 38.58681 | 19.6378  | 47.82007 | 35.3277  | 16.67802 | 45.70754 |
| Gstcd          | ENSRNOG00000011669 | 5.412991 | 3.340052 | 5.061829 | 4.797125 | 2.469367 | 4.113498 |
| Ctbs           | ENSRNOG00000015573 | 32.90197 | 37.22339 | 31.38187 | 27.52534 | 33.44934 | 27.60251 |
| Mcrs1          | ENSRNOG00000054838 | 30.33046 | 25.8041  | 30.37022 | 26.41276 | 22.66917 | 27.82014 |
| Ndufb6         | ENSRNOG00000024539 | 59.99506 | 45.35218 | 65.07547 | 54.39273 | 36.6781  | 57.35867 |
| RGD1563365     | ENSRNOG00000008696 | 17.90611 | 18.80694 | 20.4331  | 16.56312 | 16.87244 | 19.05764 |
| Map2k1         | ENSRNOG00000010176 | 107.3074 | 71.17395 | 127.3808 | 96.79012 | 56.54159 | 117.3435 |
| Fam173b        | ENSRNOG00000022347 | 17.27588 | 15.69666 | 13.79126 | 14.93175 | 14.04606 | 12.1541  |
| Kcnn4          | ENSRNOG00000019440 | 45.57085 | 51.43376 | 24.12254 | 39.88888 | 45.9879  | 20.40515 |
| AABR07037489.1 | ENSRNOG00000060137 | 1.742441 | 2.00557  | 2.266314 | 1.373998 | 1.769077 | 1.939625 |
| Gcdh           | ENSRNOG00000003307 | 24.63224 | 29.05363 | 20.7911  | 21.86211 | 24.98502 | 17.86491 |
| Ss18           | ENSRNOG00000016800 | 37.30763 | 33.67539 | 38.29424 | 34.78653 | 31.22714 | 36.64042 |
| Wdr33          | ENSRNOG00000011382 | 14.80391 | 15.0331  | 16.32253 | 14.0847  | 14.46616 | 15.85625 |
| Gsdmd          | ENSRNOG00000007728 | 95.73202 | 70.75197 | 83.07847 | 88.38809 | 60.55797 | 76.15447 |
| Wwp2           | ENSRNOG00000012937 | 28.95229 | 22.54094 | 39.24456 | 26.55174 | 21.00335 | 37.25513 |
| Pou5f1         | ENSRNOG00000046487 | 0.212592 | 0.172552 | 0.197065 | 0.113543 | 0.052584 | 0.120213 |
| Nxt1           | ENSRNOG00000004700 | 43.76327 | 27.88109 | 35.1742  | 37.04909 | 20.18865 | 30.26407 |
| Tpd5212        | ENSRNOG00000015122 | 59.69142 | 54.81379 | 64.55763 | 54.90601 | 48.75174 | 60.64195 |
| Pycr3          | ENSRNOG00000054724 | 39.6736  | 28.27786 | 35.09124 | 33.54725 | 22.13335 | 31.03129 |
| Prss46         | ENSRNOG00000020981 | 0.384664 | 1.921327 | 0.713136 | 0.126427 | 1.75653  | 0.481877 |
| Btg2           | ENSRNOG00000003300 | 11.50511 | 13.86711 | 9.903963 | 10.37951 | 12.68805 | 8.247768 |
| Dusp14         | ENSRNOG00000030091 | 8.178035 | 8.117962 | 13.05822 | 6.791374 | 6.142431 | 11.70759 |
| Slc25a39       | ENSRNOG00000020994 | 104.9037 | 87.57143 | 107.9845 | 97.03893 | 81.6285  | 98.5785  |
| Pkp4           | ENSRNOG00000005504 | 5.722504 | 4.6457   | 7.377469 | 5.431435 | 4.383031 | 7.192962 |
| AABR07053879.1 | ENSRNOG00000027574 | 2.342022 | 1.068433 | 2.028601 | 1.927531 | 0.607781 | 1.736826 |
| Akr7a2         | ENSRNOG00000017780 | 78.54695 | 75.2004  | 64.65091 | 74.44505 | 68.72481 | 58.81705 |
| Aass           | ENSRNOG00000039494 | 22.37286 | 14.75398 | 20.12545 | 20.58095 | 11.96942 | 17.45647 |
| Zfp410         | ENSRNOG00000010985 | 19.61216 | 18.29812 | 18.34869 | 16.78616 | 16.10048 | 16.53766 |
| RGD1309594     | ENSRNOG00000001215 | 18.1018  | 14.91918 | 15.22055 | 13.60923 | 11.33655 | 12.36395 |

|             |                    |          |          |          |          |          |          |
|-------------|--------------------|----------|----------|----------|----------|----------|----------|
| Micu1       | ENSRNOG00000043436 | 39.46361 | 37.89019 | 35.26882 | 35.17705 | 32.51872 | 31.86178 |
| Rsl24d1     | ENSRNOG00000052787 | 55.46296 | 38.88102 | 42.32288 | 52.58151 | 35.20051 | 39.97673 |
| Uqcrh       | ENSRNOG00000012550 | 207.0351 | 222.7396 | 248.8634 | 193.1394 | 202.7323 | 226.8134 |
| Ctnnb1      | ENSRNOG00000054172 | 251.3902 | 265.0367 | 295.4426 | 227.9022 | 243.5893 | 280.6427 |
| Cdc23       | ENSRNOG00000024241 | 30.01178 | 24.55085 | 31.63214 | 25.77126 | 20.07359 | 28.78773 |
| Plin3       | ENSRNOG00000048834 | 122.3412 | 141.1221 | 136.7682 | 110.6425 | 123.92   | 124.8747 |
| Twsg1       | ENSRNOG00000013340 | 35.44639 | 54.96319 | 35.83331 | 33.23035 | 53.56189 | 33.74301 |
| RGD1308430  | ENSRNOG00000029146 | 35.69616 | 29.22035 | 34.93616 | 31.14614 | 22.69162 | 27.646   |
| LOC10368992 | ENSRNOG00000047396 | 21.02266 | 20.92861 | 17.70364 | 19.16754 | 18.21462 | 15.85008 |
| 7           |                    |          |          |          |          |          |          |
| Mrpl13      | ENSRNOG00000004401 | 52.89999 | 36.65757 | 53.1847  | 47.9014  | 28.64892 | 45.91729 |
| Hspb2       | ENSRNOG00000010402 | 54.92161 | 60.96996 | 52.62188 | 50.84864 | 54.40636 | 46.96719 |
| Gpx1        | ENSRNOG00000048812 | 185.9823 | 51.46836 | 127.0657 | 170.5898 | 40.21458 | 108.9216 |
| Pgm1        | ENSRNOG00000009889 | 43.59324 | 32.41719 | 52.08765 | 36.52035 | 27.81407 | 46.96524 |
| Ppme1       | ENSRNOG00000017227 | 25.43354 | 19.23136 | 28.49105 | 23.611   | 17.17224 | 25.67448 |
| Klhdc10     | ENSRNOG00000010267 | 21.36029 | 21.39911 | 21.96771 | 20.18834 | 19.8179  | 20.07534 |
| Ppie        | ENSRNOG00000014762 | 36.25539 | 21.62978 | 32.51955 | 33.93843 | 18.75391 | 30.73297 |
| Sdf2        | ENSRNOG00000012121 | 66.85652 | 71.67662 | 78.54911 | 64.54952 | 67.94263 | 75.32056 |
| Polr3a      | ENSRNOG00000010008 | 8.85211  | 8.425969 | 7.818209 | 8.308844 | 7.575137 | 7.188801 |
| Emc7        | ENSRNOG00000005884 | 93.56023 | 77.47666 | 92.58352 | 82.60848 | 64.50075 | 84.58839 |
| Ufm1        | ENSRNOG00000038176 | 27.62054 | 23.7105  | 29.35627 | 23.6555  | 20.51731 | 26.90073 |
| Lonp2       | ENSRNOG00000015162 | 23.01912 | 24.05624 | 22.88998 | 21.35074 | 22.96354 | 21.70853 |
| Irak1       | ENSRNOG00000060869 | 31.05072 | 38.28504 | 32.51281 | 29.49799 | 35.76013 | 30.35339 |
| Ptgs2       | ENSRNOG00000002525 | 5.212059 | 3.807267 | 3.072334 | 4.815288 | 3.321721 | 2.439357 |
| Irf1        | ENSRNOG00000008144 | 56.51633 | 38.21702 | 42.32215 | 50.57229 | 34.39199 | 38.03838 |
| Hmgcs2      | ENSRNOG00000019120 | 0.223951 | 1.211811 | 0.276791 | 0.159479 | 1.163265 | 0.236388 |
| Tnpo1       | ENSRNOG00000014999 | 36.52891 | 35.72682 | 41.24579 | 34.53903 | 34.50821 | 39.62548 |
| Cep85       | ENSRNOG00000016249 | 13.12901 | 10.36671 | 13.27782 | 11.18053 | 9.14903  | 11.80381 |
| Ppil2       | ENSRNOG00000026900 | 40.06511 | 31.00658 | 35.29648 | 36.65371 | 25.64563 | 29.91706 |
| Msx1        | ENSRNOG00000006876 | 7.948359 | 7.99879  | 9.517561 | 6.103062 | 5.944932 | 8.259413 |
| Zcchc4      | ENSRNOG00000029064 | 4.437212 | 4.454298 | 4.169458 | 3.765804 | 3.352726 | 3.230876 |
| Gpr108      | ENSRNOG00000046128 | 36.09472 | 37.92407 | 34.77364 | 32.49269 | 33.07931 | 28.86925 |
| Vdac2       | ENSRNOG00000013505 | 102.2216 | 99.17547 | 103.4013 | 96.32574 | 89.53692 | 95.6646  |
| Narf        | ENSRNOG00000036664 | 10.56031 | 11.70218 | 13.69079 | 9.918164 | 10.7177  | 13.00424 |
| Arfp2       | ENSRNOG00000018440 | 21.22987 | 28.07678 | 24.62355 | 18.56231 | 26.3028  | 22.8078  |
| Gucy2e      | ENSRNOG00000015058 | 0.113566 | 0.076615 | 0.105271 | 0.077196 | 0.020429 | 0.046704 |
| Tiprl       | ENSRNOG00000003048 | 15.87953 | 13.42734 | 16.462   | 13.33891 | 11.02975 | 14.89465 |
| Kcnj8       | ENSRNOG00000013463 | 8.51431  | 10.84762 | 17.6443  | 6.221903 | 7.644763 | 13.86049 |
| Alg12       | ENSRNOG00000004591 | 18.36963 | 12.90793 | 13.39369 | 16.33854 | 9.852196 | 11.32411 |
| Cenpb       | ENSRNOG00000057284 | 87.49191 | 79.97957 | 91.92404 | 83.20809 | 74.30122 | 84.87248 |
| Psenen      | ENSRNOG00000020941 | 87.44999 | 94.2137  | 77.92212 | 82.4799  | 86.66148 | 69.79651 |
| Gtf2f1      | ENSRNOG00000047134 | 59.28009 | 45.13245 | 51.95698 | 54.90815 | 38.59691 | 44.77003 |
| Atp5po      | ENSRNOG00000001991 | 202.4369 | 166.8752 | 208.247  | 183.6342 | 136.6853 | 178.6539 |
| Smim3       | ENSRNOG00000019536 | 23.46546 | 27.04976 | 49.90776 | 19.42967 | 20.70475 | 43.41906 |
| Mtrr        | ENSRNOG00000017826 | 12.67794 | 10.97931 | 13.07609 | 11.17168 | 9.754558 | 11.08947 |
| Mrpl53      | ENSRNOG00000053109 | 70.50895 | 53.69766 | 66.7125  | 64.2859  | 46.85104 | 56.998   |
| Sfrp4       | ENSRNOG00000054957 | 1.881138 | 1.502183 | 2.562536 | 1.10953  | 0.801113 | 2.094133 |
| Nup205      | ENSRNOG00000010852 | 27.04382 | 15.18471 | 24.76682 | 24.64486 | 11.23463 | 21.64304 |
| Ak2         | ENSRNOG00000000122 | 63.6887  | 36.46394 | 65.02726 | 56.72396 | 26.67788 | 58.81143 |
| Trappc10    | ENSRNOG00000023210 | 11.45644 | 13.10183 | 11.47914 | 11.24099 | 12.74748 | 11.15255 |
| Hax1        | ENSRNOG00000045647 | 36.06871 | 35.92328 | 38.4244  | 32.59759 | 30.1599  | 33.63747 |
| Ifrd2       | ENSRNOG00000016150 | 15.10796 | 6.570863 | 8.683836 | 13.57474 | 4.387418 | 6.130996 |
| Eif31       | ENSRNOG00000011020 | 112.358  | 117.4781 | 115.4445 | 103.4628 | 104.5268 | 107.0354 |
| RGD1308706  | ENSRNOG00000017090 | 12.84372 | 10.93111 | 17.87038 | 11.64902 | 9.230124 | 16.78742 |
| Ide         | ENSRNOG00000016833 | 22.56454 | 21.76424 | 21.87084 | 21.20897 | 20.55494 | 19.95923 |
| Lsm1        | ENSRNOG00000015375 | 29.24263 | 25.43573 | 23.70049 | 27.47602 | 23.6774  | 22.60165 |

|                  |                    |          |          |          |          |          |          |
|------------------|--------------------|----------|----------|----------|----------|----------|----------|
| Noa1             | ENSRNOG00000002055 | 9.879759 | 9.95169  | 11.27911 | 8.967077 | 8.500563 | 9.802344 |
| Mark3            | ENSRNOG00000010330 | 21.51136 | 22.61816 | 27.26894 | 20.46356 | 21.3499  | 25.56585 |
| Cops3            | ENSRNOG00000053943 | 42.26895 | 30.28025 | 39.50486 | 36.65694 | 25.97092 | 36.0969  |
| Pdf              | ENSRNOG00000022303 | 25.03276 | 31.02754 | 27.05507 | 22.59016 | 29.35752 | 24.25897 |
| RGD1309104       | ENSRNOG00000028236 | 26.49201 | 28.53037 | 27.35993 | 23.74244 | 24.29078 | 24.47885 |
| Epb4114b         | ENSRNOG00000056550 | 0.010292 | 0.019093 | 0.01431  | 0        | 0.010182 | 0        |
| Cks1b            | ENSRNOG00000042561 | 49.99534 | 22.35255 | 45.49787 | 44.60727 | 15.62409 | 41.48645 |
| Pex14            | ENSRNOG00000013498 | 21.72444 | 20.51784 | 22.33251 | 18.65292 | 15.73483 | 19.06592 |
| Nip7             | ENSRNOG00000020391 | 34.42536 | 27.43896 | 32.82686 | 28.29425 | 19.58449 | 28.11801 |
| Ube3d            | ENSRNOG00000010802 | 3.65343  | 3.821987 | 4.214411 | 3.252086 | 3.433921 | 3.617593 |
| Trim27           | ENSRNOG00000055917 | 53.06054 | 42.3941  | 43.83912 | 45.43891 | 36.23839 | 39.30452 |
| Psmb3            | ENSRNOG00000052730 | 216.6367 | 157.9227 | 217.0339 | 191.9296 | 118.9811 | 190.0636 |
| Kcnk5            | ENSRNOG00000047005 | 0.205957 | 0.140772 | 0.21101  | 0.023158 | 0.032174 | 0.049036 |
| P4ha1            | ENSRNOG00000050655 | 337.4466 | 181.6594 | 487.4718 | 310.1502 | 141.5962 | 461.7577 |
| Lonp1            | ENSRNOG00000046502 | 51.43788 | 35.44385 | 44.27672 | 50.73694 | 34.27159 | 43.19256 |
| LOC691083        | ENSRNOG00000013437 | 3.593413 | 2.52805  | 4.023335 | 2.954269 | 1.777637 | 3.579879 |
| Angptl4          | ENSRNOG00000007545 | 22.49369 | 2.472109 | 7.724541 | 21.32918 | 1.672564 | 6.36981  |
| Usp4             | ENSRNOG00000054863 | 26.02589 | 22.57717 | 23.01173 | 23.77558 | 21.08769 | 20.49453 |
| Rpl4             | ENSRNOG00000009378 | 1146.183 | 1110.195 | 1125.729 | 1040.696 | 931.6848 | 981.0089 |
| Lta4h            | ENSRNOG00000004494 | 30.83531 | 26.3949  | 43.27111 | 27.09695 | 23.29503 | 38.1789  |
| Gemin6           | ENSRNOG00000027332 | 15.77202 | 7.651277 | 13.78825 | 13.38197 | 4.199931 | 11.61554 |
| Sdc1             | ENSRNOG00000059947 | 69.96849 | 49.48102 | 90.59683 | 61.04632 | 34.31616 | 77.80292 |
| Ccz1b            | ENSRNOG00000001032 | 12.06563 | 12.27871 | 14.02677 | 10.99617 | 10.5337  | 12.27759 |
| Bcs1l            | ENSRNOG00000016754 | 12.91108 | 7.815306 | 10.2161  | 11.52923 | 6.330698 | 9.332602 |
| Gusb             | ENSRNOG00000000913 | 33.32641 | 40.80356 | 33.81368 | 31.64013 | 37.93016 | 31.37706 |
| Snrpd1           | ENSRNOG00000013714 | 55.91754 | 37.92886 | 68.81818 | 48.25621 | 25.00522 | 56.91997 |
| C5ar2            | ENSRNOG00000049028 | 3.802072 | 4.018952 | 6.474997 | 2.990864 | 3.324309 | 5.999821 |
| Mok              | ENSRNOG00000007850 | 4.43512  | 2.003737 | 2.257951 | 3.878354 | 1.614255 | 1.912762 |
| Grina            | ENSRNOG00000029941 | 168.6217 | 186.256  | 124.2473 | 158.4681 | 170.5408 | 107.0138 |
| Pja1             | ENSRNOG00000047339 | 19.90818 | 21.34989 | 19.52849 | 17.83683 | 18.02082 | 17.21664 |
| Coro1a           | ENSRNOG00000019430 | 1.174145 | 0.914883 | 0.957778 | 0.476593 | 0.209103 | 0.531149 |
| Siae             | ENSRNOG00000031266 | 13.18561 | 11.31501 | 13.87231 | 11.92839 | 9.59903  | 11.7234  |
| Slc25a44         | ENSRNOG00000025269 | 14.24042 | 24.85507 | 13.30589 | 13.11819 | 23.26422 | 11.37908 |
| Nmi              | ENSRNOG00000027502 | 41.36351 | 20.81584 | 32.5565  | 39.10368 | 19.21245 | 29.80421 |
| Cct5             | ENSRNOG00000011632 | 279.7239 | 243.1374 | 300.5855 | 255.3963 | 201.9638 | 269.1878 |
| Tpi1             | ENSRNOG00000015290 | 115.4818 | 47.15681 | 180.0346 | 104.7446 | 30.71872 | 161.6038 |
| Rnd1             | ENSRNOG00000059857 | 34.53868 | 11.71133 | 36.0612  | 28.16857 | 6.464991 | 32.36766 |
| Sms              | ENSRNOG00000007688 | 35.74011 | 27.53772 | 32.11917 | 33.49441 | 25.95265 | 29.37693 |
| LOC10091050<br>6 | ENSRNOG00000060946 | 3.700064 | 3.621932 | 4.265716 | 3.416072 | 3.366458 | 3.852271 |
| Birc2            | ENSRNOG00000010602 | 21.34786 | 15.76704 | 19.00774 | 20.44896 | 14.55655 | 18.29118 |
| Lrit1            | ENSRNOG00000012790 | 0.092531 | 0.128749 | 0.085773 | 0.029652 | 0.027465 | 0.016743 |
| Vav1             | ENSRNOG00000050430 | 0.074149 | 0.027513 | 0.027493 | 0.031682 | 0        | 0        |
| Pla1a            | ENSRNOG00000057153 | 45.32843 | 21.87011 | 23.02306 | 39.45914 | 14.89894 | 19.01113 |
| Cyp2j10          | ENSRNOG00000042224 | 1.773824 | 1.940516 | 1.152771 | 1.513744 | 1.783611 | 0.968146 |
| LOC10030246<br>5 | ENSRNOG00000027542 | 0.691922 | 0.252149 | 0.62993  | 0.620311 | 0.134471 | 0.54776  |
| Phb2             | ENSRNOG00000012999 | 140.6274 | 113.5768 | 132.3011 | 126.9323 | 90.05285 | 114.1693 |
| Psmb7            | ENSRNOG00000011732 | 117.0311 | 81.51174 | 121.3303 | 105.5228 | 62.03451 | 106.9848 |
| Adk              | ENSRNOG00000012325 | 26.13091 | 18.59617 | 25.24601 | 23.35363 | 14.46392 | 22.67644 |
| Sumo1            | ENSRNOG00000016133 | 113.9933 | 90.85376 | 120.201  | 105.3402 | 75.8658  | 106.544  |
| Mcm2             | ENSRNOG00000016316 | 82.80157 | 34.19005 | 53.43191 | 74.92927 | 25.45062 | 48.40092 |
| Dcaf13           | ENSRNOG00000004301 | 39.07921 | 28.45572 | 37.75938 | 37.32259 | 26.67796 | 35.01622 |
| Jazf1            | ENSRNOG00000027026 | 1.751263 | 2.150057 | 2.530515 | 1.320463 | 1.885559 | 2.23686  |
| Alyref           | ENSRNOG00000036687 | 56.64718 | 31.15214 | 56.08152 | 48.91202 | 19.47972 | 48.75728 |
| Tmem88           | ENSRNOG00000009870 | 1.437747 | 1.044705 | 1.865825 | 1.075035 | 0.782368 | 1.40919  |

|                    |                    |          |          |          |          |          |          |
|--------------------|--------------------|----------|----------|----------|----------|----------|----------|
| Wdr74              | ENSRNOG00000042878 | 25.18568 | 18.3623  | 22.51686 | 21.48787 | 13.52582 | 19.71515 |
| Esd                | ENSRNOG00000009512 | 87.93608 | 58.98001 | 76.09937 | 78.27593 | 50.72434 | 62.36151 |
| Mtcp1              | ENSRNOG00000024071 | 7.267577 | 9.238307 | 8.857574 | 6.612963 | 8.122534 | 8.036463 |
| Rnps1              | ENSRNOG00000008703 | 110.4835 | 67.82661 | 103.5217 | 95.49565 | 58.27466 | 93.80611 |
| Nrn1               | ENSRNOG00000050767 | 2.865306 | 2.708509 | 2.908975 | 2.448518 | 2.429909 | 2.41954  |
| Ccdc12             | ENSRNOG00000020946 | 17.3659  | 13.45253 | 20.89248 | 15.14573 | 10.6471  | 17.09063 |
| LOC10036041<br>3   | ENSRNOG00000056855 | 1476.182 | 1677.179 | 1567.915 | 1349.038 | 1461.64  | 1354.777 |
| Ssb                | ENSRNOG00000007998 | 57.35403 | 41.45729 | 58.76784 | 49.20696 | 30.98904 | 52.76067 |
| Tnfaip2            | ENSRNOG00000010165 | 52.07632 | 41.35311 | 46.48509 | 49.28861 | 38.47148 | 42.06949 |
| LOC687399          | ENSRNOG00000045541 | 0.427266 | 0.442963 | 0.419356 | 0.295314 | 0.298398 | 0.204653 |
| Ubt1               | ENSRNOG00000013813 | 21.99481 | 26.8277  | 24.06794 | 19.21081 | 23.48463 | 22.17179 |
| Mcu                | ENSRNOG00000045920 | 16.288   | 13.24934 | 15.72369 | 13.34223 | 11.29012 | 13.89935 |
| Nubp1              | ENSRNOG00000002574 | 33.40096 | 26.71037 | 41.19854 | 31.10322 | 22.83936 | 38.45647 |
| Ccdc84             | ENSRNOG00000012137 | 8.644949 | 12.9352  | 10.20852 | 7.467752 | 11.23071 | 9.181708 |
| Pop1               | ENSRNOG00000005243 | 6.053209 | 4.474151 | 7.167506 | 5.392046 | 3.311917 | 6.134563 |
| Cd302              | ENSRNOG00000006623 | 38.57321 | 57.31269 | 33.51206 | 36.72796 | 55.87943 | 32.4562  |
| Arpin              | ENSRNOG00000014589 | 21.34724 | 15.01081 | 23.47438 | 19.69791 | 12.2119  | 20.66412 |
| Paics              | ENSRNOG00000002101 | 63.9712  | 61.4152  | 55.15168 | 57.4066  | 52.16974 | 49.71306 |
| Fam213b            | ENSRNOG00000013468 | 7.792411 | 8.538936 | 10.35861 | 6.082673 | 6.015264 | 7.321286 |
| Naif1              | ENSRNOG00000050204 | 3.48547  | 3.428059 | 3.18506  | 2.983755 | 2.690301 | 2.739703 |
| Neil1              | ENSRNOG00000018577 | 6.38857  | 7.840987 | 6.445652 | 4.619041 | 5.955277 | 5.367155 |
| Psm8               | ENSRNOG00000000456 | 73.84423 | 24.1591  | 40.36613 | 70.10348 | 17.87401 | 36.01132 |
| Wdr54              | ENSRNOG00000060514 | 16.43873 | 10.71971 | 17.41954 | 13.24462 | 8.792426 | 15.25417 |
| P4ha2              | ENSRNOG00000033663 | 91.20181 | 84.91468 | 123.3542 | 83.54954 | 71.39883 | 112.8406 |
| Lars               | ENSRNOG00000018304 | 49.0563  | 47.17571 | 49.58824 | 44.91341 | 40.28101 | 44.903   |
| AABR0702665<br>4.1 | ENSRNOG00000014745 | 12.15421 | 14.43459 | 17.03625 | 11.13375 | 12.75401 | 15.24506 |
| Calm2              | ENSRNOG00000016770 | 310.4896 | 244.7874 | 369.8193 | 280.8355 | 195.3414 | 336.1488 |
| Cd44               | ENSRNOG00000006094 | 103.0924 | 69.96867 | 89.17583 | 96.63324 | 62.93068 | 85.1916  |
| Cluap1             | ENSRNOG00000007117 | 21.57038 | 14.9627  | 18.30813 | 19.76095 | 12.82737 | 15.24553 |
| Psm4               | ENSRNOG00000021042 | 120.4836 | 87.92077 | 100.6265 | 105.1863 | 73.16341 | 91.82689 |
| Cdc7               | ENSRNOG00000002105 | 8.367139 | 4.059826 | 7.445756 | 7.328806 | 2.470764 | 6.463708 |
| Aip                | ENSRNOG00000022289 | 28.61389 | 25.02811 | 28.59049 | 25.7643  | 23.41235 | 26.41233 |
| Gnal               | ENSRNOG00000010440 | 0.109409 | 0.081191 | 0.101418 | 0.046747 | 0.043299 | 0.059392 |
| Noc41              | ENSRNOG00000037478 | 7.676619 | 6.109295 | 6.600553 | 6.646774 | 5.479503 | 5.920005 |
| Dpy30              | ENSRNOG00000027126 | 47.0915  | 32.35248 | 47.05736 | 43.67657 | 26.24617 | 42.08769 |
| Agtrap             | ENSRNOG00000008619 | 18.33518 | 23.54936 | 14.9846  | 17.25582 | 22.35906 | 13.20219 |
| Pigq               | ENSRNOG00000020140 | 21.78901 | 14.96732 | 18.16849 | 20.52215 | 14.04595 | 17.43882 |
| Cox7a21            | ENSRNOG00000004526 | 141.197  | 169.2754 | 144.1582 | 129.4207 | 148.9032 | 129.4799 |
| Me2                | ENSRNOG00000015582 | 17.80806 | 11.95772 | 20.58378 | 15.96361 | 9.789687 | 17.45618 |
| Slc51b             | ENSRNOG00000028889 | 2.956626 | 0.731358 | 1.735758 | 2.000189 | 0.195016 | 0.980828 |
| AABR0706327<br>9.1 | ENSRNOG00000051056 | 20.28183 | 17.90603 | 18.77591 | 16.66503 | 15.77593 | 16.26843 |
| Nat9               | ENSRNOG00000003264 | 17.83299 | 19.66518 | 20.07458 | 15.94    | 17.8131  | 17.11523 |
| Urod               | ENSRNOG00000018211 | 56.99624 | 58.48475 | 51.95003 | 51.39347 | 50.76326 | 47.51054 |
| RGD1308147         | ENSRNOG00000015523 | 11.8256  | 11.00481 | 12.05451 | 10.84468 | 9.819047 | 10.37231 |
| Nme6               | ENSRNOG00000020721 | 17.20811 | 12.37245 | 13.34606 | 15.40385 | 10.64376 | 12.31757 |
| Slc4a5             | ENSRNOG00000010378 | 0.060207 | 0.055849 | 0.027905 | 0.010719 | 0.009928 | 0        |
| Gch1               | ENSRNOG00000011039 | 2.93907  | 1.222137 | 2.442563 | 2.652286 | 0.726969 | 1.94848  |
| Ube216             | ENSRNOG00000030467 | 57.24313 | 22.59436 | 45.79936 | 49.70221 | 17.27016 | 41.4226  |
| Emc6               | ENSRNOG00000019352 | 25.14625 | 17.82152 | 20.51421 | 19.35314 | 13.13746 | 17.2942  |
| Ncbp3              | ENSRNOG00000018550 | 11.87753 | 12.09407 | 12.82282 | 10.54255 | 10.6163  | 10.60455 |
| Ergic2             | ENSRNOG00000001852 | 39.79381 | 33.37542 | 43.5334  | 34.14973 | 28.95721 | 40.38033 |
| Dok1               | ENSRNOG00000007412 | 48.24022 | 24.69206 | 39.6609  | 43.59074 | 21.80018 | 36.68539 |
| Rhod               | ENSRNOG00000019220 | 13.99881 | 16.45444 | 12.32048 | 12.389   | 14.97525 | 9.876206 |

|             |                    |          |          |          |          |          |          |
|-------------|--------------------|----------|----------|----------|----------|----------|----------|
| Pgs1        | ENSRNOG00000002949 | 26.55712 | 30.91282 | 36.85668 | 22.94991 | 25.71586 | 33.82187 |
| LOC10091151 |                    |          |          |          |          |          |          |
| 5           | ENSRNOG00000050669 | 391.2944 | 163.2993 | 613.1073 | 344.1012 | 100.1015 | 529.2179 |
| Zfp276      | ENSRNOG00000016631 | 7.838792 | 8.453439 | 8.117859 | 6.078089 | 7.433054 | 6.341321 |
| Elac2       | ENSRNOG00000003424 | 16.36263 | 13.35245 | 16.52684 | 14.90864 | 10.97082 | 13.91946 |
| Nup54       | ENSRNOG00000002247 | 21.94472 | 15.9046  | 19.98834 | 19.80841 | 12.43594 | 16.14512 |
| Gon7        | ENSRNOG00000046085 | 4.386987 | 3.145759 | 4.5615   | 4.038652 | 2.741321 | 3.969095 |
| Psmc2       | ENSRNOG00000012026 | 161.6693 | 104.697  | 131.7433 | 145.6468 | 80.03717 | 116.7453 |
| Nup43       | ENSRNOG00000049505 | 19.12074 | 8.613285 | 14.57193 | 16.98762 | 6.688721 | 11.34867 |
| Fam72a      | ENSRNOG00000042747 | 7.053724 | 3.394538 | 6.931807 | 5.268562 | 2.151377 | 5.901971 |
| Psmb9       | ENSRNOG00000000459 | 97.18312 | 25.20658 | 45.01949 | 86.94693 | 18.62419 | 38.77761 |
| Bad         | ENSRNOG00000021147 | 41.22529 | 43.32117 | 45.27282 | 35.46105 | 32.80833 | 36.21225 |
| LOC10834960 |                    |          |          |          |          |          |          |
| 6           | ENSRNOG00000031244 | 462.5754 | 468.6379 | 472.5734 | 429.011  | 408.5692 | 415.6707 |
| Plekhj1     | ENSRNOG00000019247 | 24.21351 | 22.41844 | 23.03559 | 20.03022 | 19.49844 | 20.63046 |
| Kif20a      | ENSRNOG00000024428 | 78.5177  | 31.71867 | 173.842  | 70.01577 | 16.16516 | 160.976  |
| Amd1        | ENSRNOG00000000585 | 59.34423 | 41.18179 | 53.2968  | 49.40879 | 34.83016 | 47.22902 |
| LOC10029450 |                    |          |          |          |          |          |          |
| 8           | ENSRNOG00000012204 | 25.11193 | 20.16913 | 20.85619 | 23.54493 | 18.29248 | 19.83111 |
| Mgap        | ENSRNOG00000011923 | 0.965194 | 0.346576 | 2.770668 | 0.565385 | 0.06161  | 2.253553 |
| Dcaf11      | ENSRNOG00000018825 | 32.23757 | 35.00166 | 35.08683 | 27.91905 | 32.48077 | 32.16427 |
| Psm7        | ENSRNOG00000056853 | 208.0679 | 171.2457 | 230.9613 | 189.0607 | 140.3423 | 196.2804 |
| Ncaph2      | ENSRNOG00000009598 | 58.09026 | 31.70604 | 49.03378 | 53.83566 | 25.60709 | 45.53926 |
| Cdk5        | ENSRNOG00000008017 | 19.85704 | 24.26312 | 23.22628 | 17.68514 | 20.64703 | 19.28202 |
| Fkbp14      | ENSRNOG00000009886 | 31.70568 | 43.1561  | 38.82366 | 26.52036 | 35.35255 | 34.22528 |
| Cldn25      | ENSRNOG00000057454 | 0.164689 | 0.152767 | 0.254434 | 0        | 0        | 0        |
| Tas1r2      | ENSRNOG00000061876 | 7.129142 | 7.044038 | 6.450969 | 6.601238 | 6.756903 | 6.02516  |
| Zfp28       | ENSRNOG00000042777 | 2.653805 | 4.651376 | 3.207473 | 2.349222 | 4.134293 | 2.865295 |
| Tmed10      | ENSRNOG00000007901 | 224.6817 | 208.9855 | 252.5503 | 205.8474 | 174.9776 | 227.3187 |
| Cdc34       | ENSRNOG00000060530 | 39.6651  | 27.97784 | 32.18024 | 35.93342 | 21.11233 | 26.15252 |
| Ube2k       | ENSRNOG00000027088 | 20.18333 | 13.89453 | 26.78933 | 18.54973 | 13.00383 | 25.51854 |
| Ccdc14      | ENSRNOG00000021469 | 6.032511 | 2.145178 | 3.885412 | 5.720578 | 1.640768 | 3.572049 |
| Cuedc2      | ENSRNOG00000019574 | 33.60053 | 25.91586 | 41.78164 | 30.10832 | 19.75469 | 35.56758 |
| Zc3hc1      | ENSRNOG00000010154 | 29.19117 | 21.08187 | 24.99811 | 25.37601 | 17.67913 | 22.92759 |
| Arfgap3     | ENSRNOG00000046472 | 49.14872 | 65.79327 | 53.01344 | 43.14278 | 55.59281 | 46.31974 |
| Nans        | ENSRNOG00000008945 | 110.7223 | 73.25037 | 101.4794 | 96.47325 | 52.35188 | 89.52569 |
| Tmem68      | ENSRNOG00000008872 | 9.175861 | 11.02195 | 10.25643 | 7.829095 | 9.594451 | 9.475012 |
| Nap115      | ENSRNOG00000007808 | 0.140022 | 0.259771 | 0.346118 | 0.074784 | 0.207803 | 0.253367 |
| Trmt6       | ENSRNOG00000021270 | 10.4339  | 8.734614 | 10.71062 | 9.576639 | 7.583057 | 9.148635 |
| Ccdc148     | ENSRNOG00000057740 | 0.042017 | 0.038975 | 0.090879 | 0        | 0        | 0.025343 |
| Dguok       | ENSRNOG00000011617 | 22.95703 | 22.70332 | 19.90175 | 20.31927 | 21.24206 | 17.32252 |
| Rpl35a11    | ENSRNOG00000032348 | 52.79638 | 38.84175 | 49.6784  | 46.30773 | 35.34937 | 43.85518 |
| Ddx18       | ENSRNOG00000025430 | 26.25643 | 22.81522 | 24.35484 | 22.91146 | 20.96208 | 21.96813 |
| Srbd1       | ENSRNOG00000014720 | 15.16704 | 12.30407 | 13.34556 | 14.52103 | 11.25182 | 12.69733 |
| Ces2g       | ENSRNOG00000013808 | 0.098788 | 0.018327 | 0.009157 | 0.084418 | 0.009774 | 0        |
| Farsa       | ENSRNOG00000003149 | 53.21382 | 42.7956  | 50.76356 | 47.13317 | 34.64351 | 46.32589 |
| Borcs7      | ENSRNOG00000020076 | 10.28048 | 9.487526 | 10.74716 | 9.391206 | 8.975753 | 9.808239 |
| Ndufs2      | ENSRNOG00000038372 | 120.8956 | 118.993  | 126.4038 | 111.7413 | 102.2509 | 114.1149 |
| Ugdh        | ENSRNOG00000002643 | 151.4596 | 101.669  | 200.2838 | 140.8227 | 81.73454 | 183.3245 |
| AABR0702965 |                    |          |          |          |          |          |          |
| 1.1         | ENSRNOG00000002423 | 39.45164 | 30.09391 | 39.4938  | 34.54727 | 27.36761 | 36.03331 |
| Slc12a2     | ENSRNOG00000015971 | 12.03731 | 17.76099 | 13.65399 | 10.85282 | 16.36113 | 12.90746 |
| Prdm5       | ENSRNOG00000023679 | 10.23979 | 11.31121 | 11.03158 | 9.748076 | 10.49845 | 10.11302 |
| Ciapin1     | ENSRNOG00000016234 | 38.46201 | 31.08626 | 35.03217 | 31.52819 | 24.04453 | 31.14588 |
| Eif4a3      | ENSRNOG00000045791 | 128.2929 | 96.24943 | 111.4737 | 110.9416 | 79.1308  | 101.8943 |
| Atg4c       | ENSRNOG00000008767 | 8.152117 | 10.54094 | 9.922912 | 6.538245 | 9.151868 | 9.064252 |

|              |                    |          |          |          |          |          |          |
|--------------|--------------------|----------|----------|----------|----------|----------|----------|
| Chmp7        | ENSRNOG00000016939 | 16.3334  | 17.63623 | 16.59014 | 14.96281 | 16.44261 | 15.86031 |
| Mtg2         | ENSRNOG00000059919 | 17.49963 | 18.23568 | 19.23318 | 15.81518 | 15.44212 | 16.07453 |
| Hnrnpk       | ENSRNOG00000019113 | 254.1842 | 225.3213 | 293.2096 | 235.7554 | 191.5518 | 260.6216 |
| LOC100361259 | ENSRNOG00000055911 | 34.82046 | 38.68268 | 43.32945 | 30.92136 | 31.63377 | 38.37316 |
| Ube3c        | ENSRNOG00000010702 | 31.47533 | 29.10411 | 32.47771 | 29.28319 | 25.5203  | 30.28515 |
| Lgals8       | ENSRNOG00000018046 | 45.25115 | 47.83854 | 51.08946 | 39.8685  | 41.53263 | 47.74598 |
| Trappc5      | ENSRNOG00000001003 | 27.52146 | 29.20929 | 31.33166 | 23.49149 | 21.60422 | 25.04116 |
| Rfc3         | ENSRNOG00000001088 | 45.35983 | 15.29555 | 32.47357 | 42.48841 | 11.79203 | 27.3506  |
| Tgm1         | ENSRNOG00000020136 | 0.822812 | 0.237226 | 1.041001 | 0.641365 | 0.132013 | 0.845033 |
| Rbm3         | ENSRNOG00000005387 | 226.8183 | 245.1913 | 277.498  | 190.6719 | 187.4639 | 243.0213 |
| Atp5mf       | ENSRNOG00000027049 | 298.4216 | 256.9507 | 410.3681 | 266.8832 | 198.1661 | 355.7769 |
| Taldo1       | ENSRNOG00000018367 | 161.3976 | 124.5691 | 151.2128 | 149.4443 | 107.3674 | 128.8037 |
| Mcfd2        | ENSRNOG00000015059 | 123.069  | 119.1122 | 124.5073 | 106.8803 | 98.31462 | 113.449  |
| Serpind1     | ENSRNOG00000001865 | 0.08131  | 0.181018 | 0.180891 | 0.017371 | 0.128716 | 0.14713  |
| Arf1         | ENSRNOG00000060229 | 343.4679 | 301.9456 | 396.3753 | 324.8968 | 266.7637 | 367.4843 |
| Esam         | ENSRNOG00000033217 | 0.297272 | 0.275752 | 0.258336 | 0.119077 | 0.073529 | 0.151287 |
| Nedd8        | ENSRNOG00000019895 | 186.9357 | 133.1796 | 208.8391 | 170.6162 | 102.9185 | 186.546  |
| Epn2         | ENSRNOG00000060550 | 41.46258 | 38.82866 | 51.75978 | 37.85491 | 36.58208 | 47.4985  |
| Zfand4       | ENSRNOG00000011791 | 2.344174 | 2.292369 | 3.992474 | 2.126881 | 1.886172 | 3.615707 |
| Epor         | ENSRNOG00000012619 | 0.488479 | 0.394015 | 0.748104 | 0.29492  | 0.273166 | 0.518808 |
| Mrpl32       | ENSRNOG00000015989 | 28.553   | 23.26596 | 28.73351 | 24.75481 | 18.52693 | 26.23123 |
| LOC108348064 | ENSRNOG00000027295 | 22.55382 | 24.78652 | 23.57088 | 19.9002  | 20.02732 | 20.32285 |
| Timm8a1      | ENSRNOG00000011226 | 43.83386 | 29.8129  | 43.50815 | 35.35035 | 24.63589 | 33.68442 |
| Gnb4         | ENSRNOG00000011070 | 9.158328 | 9.369866 | 9.912618 | 8.430383 | 8.981173 | 9.236376 |
| LOC100912489 | ENSRNOG00000051891 | 941.3764 | 399.5508 | 847.9627 | 844.2185 | 249.3377 | 761.4373 |
| Ddx51        | ENSRNOG00000037480 | 9.604633 | 7.027627 | 8.110009 | 9.00648  | 5.898222 | 7.241435 |
| Msn          | ENSRNOG00000030118 | 176.6133 | 125.0437 | 215.1874 | 165.1379 | 104.4943 | 193.9347 |
| Gtf2e1       | ENSRNOG00000026008 | 12.22075 | 7.803383 | 9.44213  | 11.14527 | 5.755183 | 7.788027 |
| Akr1b8       | ENSRNOG00000009734 | 24.63783 | 9.58132  | 15.24897 | 21.95289 | 8.175538 | 12.93202 |
| Vps52        | ENSRNOG00000000470 | 18.87959 | 17.41185 | 18.92113 | 17.64067 | 15.30048 | 16.5674  |
| Ttc8         | ENSRNOG00000004542 | 9.371349 | 8.885136 | 9.144837 | 8.069479 | 7.805412 | 8.464241 |
| Dnal4        | ENSRNOG00000015583 | 20.89163 | 20.31999 | 20.7758  | 18.06397 | 16.10445 | 18.41983 |
| Ptma         | ENSRNOG00000025731 | 134.5593 | 100.5368 | 189.7092 | 120.9555 | 89.67555 | 169.9503 |
| Acy1         | ENSRNOG00000011189 | 22.84875 | 19.97915 | 20.80441 | 19.46918 | 17.30238 | 19.03398 |
| Aktip        | ENSRNOG00000011956 | 15.46919 | 22.1577  | 17.70966 | 15.15859 | 21.64939 | 17.40483 |
| Rhoj         | ENSRNOG00000021919 | 19.47564 | 18.97622 | 22.62814 | 17.79296 | 18.00653 | 21.55301 |
| Tmco4        | ENSRNOG00000017401 | 5.598559 | 4.895045 | 4.64498  | 4.417088 | 4.266781 | 3.771359 |
| LOC100359583 | ENSRNOG00000018584 | 872.1789 | 748.356  | 1219.095 | 776.5444 | 564.7914 | 1063.357 |
| Ripk3        | ENSRNOG00000020465 | 84.15735 | 47.30532 | 74.18553 | 67.55631 | 33.12379 | 65.53501 |
| Prim1        | ENSRNOG00000031993 | 54.11218 | 21.3874  | 37.99058 | 44.75829 | 13.64051 | 33.12088 |
| Fbxo18       | ENSRNOG00000018549 | 48.71099 | 51.73014 | 53.96179 | 45.27971 | 47.41481 | 51.70899 |
| Exosc2       | ENSRNOG00000009245 | 18.16761 | 8.496594 | 11.64906 | 15.30981 | 4.940676 | 9.797307 |
| LOC108348072 | ENSRNOG00000047854 | 1.753015 | 1.405282 | 4.152709 | 1.410174 | 0.749436 | 3.563667 |
| LOC108351137 | ENSRNOG00000030963 | 696.5584 | 423.2427 | 934.1855 | 635.3336 | 322.5361 | 816.2801 |
| Shroom1      | ENSRNOG00000007431 | 9.994752 | 12.64661 | 11.26191 | 8.643201 | 11.25058 | 10.5155  |
| Hnrnpr       | ENSRNOG00000011910 | 36.97849 | 26.9172  | 37.98037 | 34.34871 | 24.54594 | 36.60543 |
| Atp5if1      | ENSRNOG00000013300 | 214.1827 | 145.7239 | 213.7538 | 203.4933 | 127.4762 | 193.2545 |
| Rnh1         | ENSRNOG00000016416 | 303.1597 | 256.8896 | 302.499  | 270.6558 | 205.7069 | 273.0482 |
| Tmem120a     | ENSRNOG00000001441 | 47.69104 | 43.99223 | 42.41695 | 45.34516 | 39.51582 | 38.99716 |
| Rabepk       | ENSRNOG00000018591 | 16.32779 | 12.40007 | 14.47137 | 12.59623 | 10.46263 | 11.23052 |

|              |                    |          |          |          |          |          |          |
|--------------|--------------------|----------|----------|----------|----------|----------|----------|
| Olr1158      | ENSRNOG00000026232 | 0.318889 | 0.221853 | 0.258647 | 0.042579 | 0.078876 | 0.036064 |
| Eif2b4       | ENSRNOG00000005301 | 18.51082 | 16.28112 | 17.55885 | 17.41645 | 14.16278 | 15.8147  |
| Ndel1        | ENSRNOG00000004139 | 49.3237  | 56.19212 | 51.0759  | 45.09951 | 53.65678 | 46.16751 |
| Abat         | ENSRNOG00000002636 | 0.014234 | 0.026407 | 0.026389 | 0        | 0        | 0        |
| Slc8b1       | ENSRNOG00000001383 | 33.58993 | 40.51626 | 22.46425 | 31.25948 | 39.18588 | 20.98253 |
| Porcn        | ENSRNOG00000004819 | 3.967306 | 5.594507 | 3.974704 | 2.86799  | 4.361331 | 3.335596 |
| Sfi1         | ENSRNOG00000018412 | 7.426088 | 5.913854 | 6.100112 | 7.291021 | 5.823102 | 5.925321 |
| Rgs16        | ENSRNOG00000027024 | 0.091509 | 0.042442 | 0.028275 | 0.065165 | 0.01509  | 0.013799 |
| Vps4b        | ENSRNOG00000002705 | 41.78041 | 37.34881 | 38.37105 | 38.30401 | 32.4245  | 35.74196 |
| Pak1         | ENSRNOG00000029784 | 49.47848 | 31.10123 | 43.76997 | 47.94156 | 29.73145 | 41.35804 |
| Wdr13        | ENSRNOG00000039587 | 23.42789 | 25.41529 | 28.2271  | 18.87485 | 22.90913 | 25.19296 |
| Mroh7        | ENSRNOG00000058870 | 0.054131 | 0.050213 | 0.016726 | 0.028911 | 0.017852 | 0        |
| Cbx8         | ENSRNOG00000048113 | 7.465589 | 10.43902 | 9.816567 | 6.172896 | 8.535339 | 8.780769 |
| Rpl12        | ENSRNOG00000016220 | 581.2428 | 686.276  | 649.6227 | 523.2657 | 618.1202 | 545.4702 |
| LOC100362830 | ENSRNOG00000008551 | 546.1341 | 593.7868 | 554.5249 | 517.5917 | 539.7765 | 502.3744 |
| Tmem35b      | ENSRNOG00000028083 | 18.92011 | 11.57655 | 12.20926 | 16.44005 | 8.063698 | 10.33654 |
| Smarcd2      | ENSRNOG00000010557 | 46.99841 | 38.92947 | 44.78214 | 45.24925 | 35.59245 | 42.32357 |
| Timm10       | ENSRNOG00000007883 | 13.08531 | 9.994098 | 9.822295 | 10.3691  | 7.071281 | 8.300055 |
| Slc39a11     | ENSRNOG00000031213 | 11.41475 | 7.685848 | 10.72223 | 10.55304 | 6.203363 | 9.807864 |
| Spp12a       | ENSRNOG00000011652 | 26.32487 | 32.90794 | 28.72575 | 23.18272 | 31.23629 | 26.51498 |
| Ppp1r35      | ENSRNOG00000024505 | 16.65744 | 12.00555 | 16.32944 | 15.19024 | 9.169086 | 13.73349 |
| Ncstn        | ENSRNOG00000005355 | 68.76439 | 75.91045 | 58.59238 | 61.79262 | 67.16131 | 54.11146 |
| Nat1         | ENSRNOG00000014055 | 10.0366  | 8.724938 | 9.217537 | 9.333678 | 7.378728 | 7.939183 |
| Ubl5         | ENSRNOG00000020442 | 168.444  | 148.2759 | 165.7632 | 154.6321 | 124.29   | 150.931  |
| Gna13        | ENSRNOG00000036745 | 16.82889 | 18.28857 | 15.12538 | 15.97884 | 17.77529 | 14.6257  |
| Psmc1        | ENSRNOG00000003951 | 116.4163 | 86.21407 | 109.3365 | 110.6851 | 75.33701 | 98.67548 |
| Mrps9        | ENSRNOG00000016201 | 18.31927 | 19.57686 | 22.04579 | 15.96352 | 18.25732 | 19.48199 |
| Psm12        | ENSRNOG00000003117 | 51.134   | 36.60078 | 50.03438 | 49.44338 | 33.28075 | 47.1435  |
| Dhfr         | ENSRNOG00000013521 | 7.164826 | 3.043984 | 7.02824  | 5.690686 | 2.286191 | 5.676571 |
| Znhit3       | ENSRNOG00000027818 | 20.25678 | 13.51989 | 14.65538 | 17.85557 | 9.450593 | 12.21811 |
| RGD1304567   | ENSRNOG00000025034 | 36.79953 | 26.32863 | 28.83698 | 30.90072 | 21.64309 | 25.83376 |
| Zbed4        | ENSRNOG00000004588 | 3.120211 | 4.001962 | 3.610444 | 2.695195 | 3.382442 | 3.279554 |
| Slc46a3      | ENSRNOG00000000937 | 1.946762 | 1.64692  | 1.443655 | 1.64695  | 1.494653 | 1.183606 |
| Dnajb4       | ENSRNOG00000013011 | 22.99788 | 20.34821 | 21.37598 | 21.49712 | 17.85701 | 19.91724 |
| Gsr          | ENSRNOG00000014915 | 56.54082 | 44.04211 | 52.39353 | 50.61525 | 37.43078 | 49.01989 |
| Bnip3        | ENSRNOG00000017243 | 55.83637 | 36.20865 | 94.99728 | 46.85174 | 27.50706 | 80.1016  |
| Nae1         | ENSRNOG00000033133 | 15.66131 | 15.25199 | 18.43043 | 13.43732 | 13.86622 | 17.16757 |
| Alad         | ENSRNOG00000015206 | 12.1905  | 11.56712 | 13.16804 | 10.74121 | 8.804023 | 11.20978 |
| Clptm1       | ENSRNOG00000018255 | 88.74003 | 74.77736 | 77.52877 | 84.29755 | 66.04888 | 70.72268 |
| RGD1309534   | ENSRNOG00000010887 | 10.0473  | 10.78933 | 10.32029 | 9.668716 | 10.5974  | 10.01835 |
| Rrp9         | ENSRNOG00000012927 | 27.41347 | 14.45275 | 18.35372 | 24.4985  | 12.31357 | 16.84754 |
| P2rx2        | ENSRNOG00000037456 | 0.288285 | 0.250702 | 0.200421 | 0.211708 | 0.124786 | 0.048904 |
| Mrps10       | ENSRNOG00000022609 | 6.375119 | 4.159338 | 5.937749 | 5.636772 | 3.349892 | 4.636352 |
| Mthfsd       | ENSRNOG00000046443 | 8.641447 | 6.266384 | 7.628827 | 6.959562 | 5.394472 | 6.01884  |
| Dse          | ENSRNOG00000000824 | 35.86337 | 32.98142 | 54.34355 | 33.87515 | 29.10752 | 50.7417  |
| Tp53i3       | ENSRNOG00000005177 | 20.10971 | 19.72802 | 16.84469 | 17.29056 | 15.85155 | 14.8375  |
| Rpia         | ENSRNOG00000005576 | 11.87399 | 11.89864 | 12.67787 | 11.00121 | 11.41992 | 12.11154 |
| Kars         | ENSRNOG00000019456 | 141.4141 | 76.0849  | 115.1118 | 127.424  | 68.54305 | 105.7868 |
| Plod1        | ENSRNOG00000007763 | 76.38431 | 85.37059 | 84.63804 | 72.62881 | 79.02535 | 77.19515 |
| Gstp1        | ENSRNOG00000018237 | 498.4417 | 435.2732 | 327.2447 | 457.577  | 382.3759 | 300.4054 |
| Kntc1        | ENSRNOG00000033658 | 22.3649  | 7.053274 | 17.13196 | 20.59621 | 4.289035 | 15.60451 |
| Aig1         | ENSRNOG00000010753 | 34.95773 | 34.78186 | 43.75327 | 32.28497 | 29.51119 | 38.97247 |
| LOC303566    | ENSRNOG00000020908 | 2.499614 | 0.687955 | 1.845993 | 2.244581 | 0.298944 | 1.341994 |
| Ppa2         | ENSRNOG00000012091 | 5.114981 | 6.27525  | 6.729698 | 4.607632 | 5.503794 | 6.312496 |
| Serbp1       | ENSRNOG00000005890 | 199.7455 | 145.5385 | 204.9228 | 178.7016 | 134.9492 | 186.5763 |

|                  |                    |          |          |          |          |          |          |
|------------------|--------------------|----------|----------|----------|----------|----------|----------|
| Stx6             | ENSRNOG00000003402 | 26.96989 | 24.38462 | 24.38242 | 24.2472  | 22.98287 | 22.41098 |
| Mcm4             | ENSRNOG00000001833 | 76.85261 | 26.21446 | 50.76603 | 66.88446 | 16.29998 | 45.55079 |
| Mmp23            | ENSRNOG00000017477 | 30.15219 | 35.97138 | 24.4748  | 27.79431 | 31.26793 | 20.53292 |
| Fam109b          | ENSRNOG00000042522 | 4.588405 | 6.312778 | 5.566962 | 4.211751 | 5.608687 | 4.836866 |
| Rhoc             | ENSRNOG00000012630 | 212.8535 | 154.8296 | 219.4333 | 185.5254 | 113.0767 | 196.8522 |
| Defb29           | ENSRNOG00000023195 | 0.537953 | 0.399208 | 0.897589 | 0.114926 | 0        | 0.681393 |
| Tgds             | ENSRNOG00000009661 | 13.99419 | 13.96455 | 15.65221 | 12.37451 | 11.99576 | 14.66669 |
| Hdgf             | ENSRNOG00000042261 | 145.3852 | 107.1896 | 192.7454 | 133.2959 | 98.38632 | 175.7336 |
| Rps12            | ENSRNOG00000016411 | 192.448  | 178.1316 | 142.0465 | 166.3455 | 159.9597 | 128.4441 |
| LOC10036378<br>2 | ENSRNOG00000050510 | 80.91262 | 69.51097 | 80.88229 | 71.1192  | 53.26194 | 71.54971 |
| Cacul1           | ENSRNOG00000009954 | 34.59184 | 33.03881 | 34.69647 | 31.28944 | 29.71835 | 32.96653 |
| Gtf2e2           | ENSRNOG00000014422 | 23.45262 | 19.30165 | 25.1162  | 21.69354 | 16.09448 | 23.06957 |
| Ankrd24          | ENSRNOG00000006759 | 4.225092 | 4.049873 | 3.75581  | 3.691514 | 3.78366  | 3.312938 |
| Trmt112          | ENSRNOG00000021132 | 57.57098 | 52.06369 | 62.06757 | 48.87415 | 43.45062 | 57.55101 |
| Npm1             | ENSRNOG00000004616 | 332.5079 | 374.7094 | 374.8595 | 303.9331 | 318.0398 | 331.903  |
| Actr10           | ENSRNOG00000007504 | 73.85284 | 62.70548 | 74.30468 | 63.99899 | 56.76152 | 68.66388 |
| Cd320            | ENSRNOG00000006901 | 23.92894 | 29.46204 | 22.23453 | 21.65397 | 28.17634 | 20.84191 |
| Crat             | ENSRNOG00000018145 | 31.63283 | 39.0295  | 42.20782 | 27.77756 | 32.20278 | 38.03673 |
| Jtb              | ENSRNOG00000016379 | 23.5143  | 28.28485 | 26.19032 | 18.50754 | 25.7918  | 22.15586 |
| Trmt44           | ENSRNOG00000008898 | 2.837094 | 3.33383  | 2.816316 | 2.142844 | 2.770323 | 2.471062 |
| Anapc10          | ENSRNOG00000018296 | 17.80138 | 14.25585 | 16.89582 | 16.56773 | 11.79512 | 14.65652 |
| Elob             | ENSRNOG00000004814 | 405.6455 | 252.8642 | 424.3559 | 374.6009 | 199.7555 | 393.2483 |
| Taf8             | ENSRNOG00000015249 | 5.224299 | 4.101696 | 4.5154   | 4.337504 | 3.660276 | 3.731945 |
| Commd8           | ENSRNOG00000002320 | 31.60748 | 38.22844 | 36.9945  | 25.03918 | 28.58772 | 31.95951 |
| Fnta             | ENSRNOG00000014462 | 66.23562 | 58.16887 | 65.5778  | 58.20821 | 49.23229 | 61.11786 |
| Cstf1            | ENSRNOG00000004775 | 18.24941 | 14.79151 | 16.27476 | 15.6433  | 12.10406 | 14.90203 |
| Ofd1             | ENSRNOG00000004574 | 7.431602 | 6.962261 | 8.525246 | 6.78647  | 5.867537 | 7.89053  |
| LOC10835113<br>7 | ENSRNOG00000018630 | 704.4775 | 408.0988 | 902.6074 | 652.993  | 304.4348 | 811.4705 |
| LOC498453        | ENSRNOG00000022323 | 31.43427 | 25.33292 | 33.59612 | 28.93363 | 22.15172 | 28.84333 |
| Bzw1             | ENSRNOG00000013977 | 143.4348 | 121.7024 | 148.0208 | 129.2879 | 107.4796 | 140.6878 |
| Tsc22d1          | ENSRNOG00000001030 | 30.1005  | 34.19247 | 46.85057 | 27.87212 | 29.75075 | 43.53438 |
| Eif3g            | ENSRNOG00000020619 | 148.1935 | 129.7814 | 141.1773 | 138.9311 | 111.3846 | 123.9099 |
| Thap1            | ENSRNOG00000056956 | 9.64253  | 11.15431 | 10.93619 | 9.330505 | 10.55032 | 10.33196 |
| Ptrhd1           | ENSRNOG00000004059 | 7.255676 | 5.057327 | 8.70163  | 6.173992 | 3.366267 | 7.788414 |
| Dazap1           | ENSRNOG00000031387 | 44.25871 | 31.50399 | 58.89291 | 40.73454 | 27.42241 | 52.42642 |
| Nudt22           | ENSRNOG00000021158 | 20.10809 | 18.94541 | 18.2165  | 16.79332 | 15.17273 | 16.35116 |
| Romo1            | ENSRNOG00000045555 | 97.86943 | 91.04319 | 101.5765 | 89.25258 | 73.65752 | 86.02397 |
| Clip2            | ENSRNOG00000021611 | 23.87389 | 28.0765  | 26.18269 | 23.58887 | 27.52526 | 25.80492 |
| Clns1a           | ENSRNOG00000012788 | 52.77669 | 44.83426 | 57.83423 | 44.52244 | 35.14525 | 53.06265 |
| RGD1561916       | ENSRNOG00000013320 | 0.129035 | 0.059847 | 0.179415 | 0.034458 | 0        | 0.058372 |
| Cystm1           | ENSRNOG00000018775 | 56.09968 | 83.46119 | 104.4196 | 43.07655 | 58.96218 | 88.45776 |
| Plpp2            | ENSRNOG00000000177 | 21.66656 | 29.50892 | 26.43999 | 20.47804 | 28.61289 | 25.8485  |
| Fam192a          | ENSRNOG00000017841 | 38.62323 | 20.76028 | 24.28126 | 34.51299 | 18.71627 | 21.18064 |
| Wdr24            | ENSRNOG00000019713 | 11.23183 | 10.78766 | 9.305469 | 10.00529 | 8.792401 | 8.201498 |
| Eif2d            | ENSRNOG00000004910 | 26.18927 | 22.90916 | 27.00834 | 24.06942 | 18.95364 | 24.47087 |
| Rtca             | ENSRNOG00000014575 | 48.88428 | 40.36964 | 52.10854 | 45.50187 | 34.509   | 45.2159  |
| Mcm10            | ENSRNOG00000017981 | 13.22373 | 3.598435 | 7.005477 | 11.56426 | 1.952193 | 6.157188 |
| Exosc7           | ENSRNOG00000060337 | 21.40518 | 14.47388 | 17.53688 | 19.6696  | 11.05248 | 15.12779 |
| Cyb561d2         | ENSRNOG00000021887 | 19.83391 | 19.98456 | 21.69788 | 17.53237 | 15.78459 | 19.09933 |
| Spata7           | ENSRNOG00000003955 | 5.516966 | 6.057551 | 5.931546 | 5.031171 | 5.421278 | 4.991435 |
| Rpl5             | ENSRNOG00000023529 | 889.4476 | 1050.597 | 1044.847 | 813.8124 | 905.5504 | 894.6256 |
| Ypel5            | ENSRNOG00000026742 | 28.57502 | 28.61641 | 27.45976 | 26.19522 | 23.82351 | 23.89156 |
| Prkcd            | ENSRNOG00000016346 | 27.9011  | 28.72023 | 30.01045 | 26.87131 | 26.79026 | 27.93776 |



|             |                    |          |          |          |          |          |          |
|-------------|--------------------|----------|----------|----------|----------|----------|----------|
| LOC10255338 | ENSRNOG00000053557 | 104.6566 | 82.75941 | 113.9482 | 93.60161 | 63.78545 | 103.0049 |
| 6           |                    |          |          |          |          |          |          |
| Fam71e1     | ENSRNOG00000031739 | 2.539556 | 4.935782 | 2.522212 | 2.260575 | 4.367141 | 2.078821 |
| Fahd1       | ENSRNOG00000014727 | 6.210352 | 10.19028 | 8.465798 | 5.853302 | 9.500642 | 8.003208 |
| Inhbe       | ENSRNOG00000007601 | 0.469019 | 0.166349 | 0.332465 | 0.368379 | 0.054593 | 0.149768 |
| AABR0704293 | ENSRNOG00000057497 | 81.43188 | 64.34627 | 86.80663 | 77.47974 | 56.84491 | 78.85944 |
| 6.2         |                    |          |          |          |          |          |          |
| Ptpa        | ENSRNOG00000018457 | 102.3065 | 93.79194 | 146.5112 | 96.72975 | 83.6836  | 135.0992 |
| Mmp16       | ENSRNOG00000005708 | 20.96956 | 28.12962 | 13.51173 | 19.41715 | 27.16717 | 11.53941 |
| Slx1b       | ENSRNOG00000019369 | 5.957847 | 8.346684 | 6.727215 | 5.211689 | 6.852789 | 5.656508 |
| Arpc3       | ENSRNOG00000008673 | 131.2555 | 124.4954 | 157.4011 | 117.1256 | 96.29504 | 137.3581 |
| Gps2        | ENSRNOG00000016360 | 14.99195 | 13.26402 | 12.89511 | 13.64596 | 10.50087 | 10.45495 |
| Cnn2        | ENSRNOG00000043044 | 388.5791 | 449.4296 | 434.1428 | 355.5449 | 382.3481 | 384.2678 |
| Rchy1       | ENSRNOG00000002546 | 20.84067 | 20.66523 | 20.58831 | 19.50279 | 18.90859 | 19.72914 |
| Bmp4        | ENSRNOG00000009694 | 116.4041 | 132.4188 | 120.4606 | 101.2294 | 121.5181 | 112.9159 |
| Tubgcp2     | ENSRNOG00000018137 | 39.14359 | 23.59037 | 33.5256  | 35.837   | 17.48419 | 29.75283 |
| Mrps18b     | ENSRNOG00000000804 | 17.0401  | 12.7143  | 12.64266 | 15.14709 | 9.777357 | 11.09956 |
| Galk1       | ENSRNOG00000006359 | 43.41975 | 31.22681 | 47.68809 | 35.35292 | 21.38124 | 42.92726 |
| Got2        | ENSRNOG00000011782 | 113.9532 | 92.24727 | 126.9744 | 103.9978 | 72.25305 | 107.6366 |
| Hsf2        | ENSRNOG00000000808 | 14.09015 | 10.56561 | 12.14467 | 13.25411 | 9.225613 | 11.42645 |
| Glrx3       | ENSRNOG00000016227 | 138.2391 | 93.6559  | 125.6959 | 125.6711 | 80.0941  | 119.0523 |
| Ptpn4       | ENSRNOG00000002625 | 3.136792 | 3.601721 | 3.013053 | 2.819397 | 3.440913 | 2.796208 |
| Snape5      | ENSRNOG00000010156 | 22.62375 | 16.87623 | 17.67997 | 21.61526 | 14.89133 | 15.66422 |
| Fhl2        | ENSRNOG00000016866 | 69.36506 | 100.5533 | 76.20693 | 62.8665  | 88.5522  | 68.84117 |
| Pcbp4       | ENSRNOG00000012406 | 41.72746 | 43.909   | 40.29776 | 37.64935 | 40.77013 | 38.32387 |
| Kctd18      | ENSRNOG00000027091 | 5.719056 | 6.73182  | 6.310642 | 5.595168 | 6.489851 | 6.149831 |
| LOC10255545 | ENSRNOG00000028993 | 166.2568 | 192.4793 | 179.4143 | 135.7104 | 145.0217 | 154.6491 |
| 3           |                    |          |          |          |          |          |          |
| Ascc1       | ENSRNOG00000056647 | 30.82317 | 26.5747  | 30.86881 | 27.98181 | 23.16597 | 29.23678 |
| Khdrbs3     | ENSRNOG00000009539 | 19.47904 | 12.21883 | 17.3929  | 17.43872 | 11.19607 | 15.33712 |
| Nubpl       | ENSRNOG00000027444 | 3.973455 | 3.298801 | 4.088385 | 3.69258  | 3.164681 | 3.846601 |
| Gchfr       | ENSRNOG00000012290 | 16.42403 | 18.76785 | 16.54827 | 14.42909 | 16.01421 | 12.54445 |
| Rogdi       | ENSRNOG00000003125 | 14.07172 | 12.34686 | 10.47155 | 12.85378 | 10.9338  | 9.798426 |
| Prmt3       | ENSRNOG00000014829 | 15.73097 | 13.47557 | 16.09088 | 13.96876 | 10.82714 | 14.75228 |
| Lrrc45      | ENSRNOG00000045926 | 17.59964 | 16.60596 | 18.2845  | 15.67492 | 15.23262 | 15.50853 |
| Zfp207      | ENSRNOG00000000236 | 53.46998 | 45.14087 | 62.87052 | 50.49157 | 40.31372 | 56.627   |
| Rpl7        | ENSRNOG00000006992 | 172.8456 | 195.4413 | 207.7782 | 159.0346 | 166.5539 | 185.6969 |
| Dynll1      | ENSRNOG00000011222 | 282.5976 | 248.9449 | 344.1682 | 247.8518 | 182.5052 | 302.4683 |
| G6pd        | ENSRNOG00000056728 | 75.49272 | 87.82367 | 93.05626 | 70.86495 | 78.7031  | 83.54621 |
| Slc46a1     | ENSRNOG00000010291 | 10.95664 | 15.42097 | 8.690176 | 8.782106 | 12.32376 | 7.170112 |
| AABR0707004 | ENSRNOG00000050630 | 466.1798 | 274.2971 | 591.4759 | 423.6667 | 232.0894 | 516.9239 |
| 3.1         |                    |          |          |          |          |          |          |
| Bcam        | ENSRNOG00000029399 | 0.263014 | 0.243974 | 0.344193 | 0.165262 | 0.091843 | 0.265956 |
| Pbdc1       | ENSRNOG00000002662 | 22.40502 | 25.20912 | 23.90945 | 19.25432 | 18.58671 | 18.74838 |
| Pdcd2l      | ENSRNOG00000021119 | 8.250465 | 10.05272 | 7.824526 | 8.114885 | 9.806252 | 7.538455 |
| U2af114     | ENSRNOG00000024497 | 23.5308  | 16.60274 | 22.62424 | 21.89286 | 14.42682 | 19.36422 |
| Arfip1      | ENSRNOG00000010533 | 40.37435 | 46.91208 | 45.76482 | 35.46462 | 40.38196 | 42.63762 |
| Vhl         | ENSRNOG00000010258 | 34.16751 | 23.12811 | 29.75493 | 30.52289 | 21.33554 | 26.1588  |
| Commd2      | ENSRNOG00000043386 | 9.836552 | 9.592393 | 9.834084 | 8.301328 | 8.765173 | 8.913812 |
| Grn         | ENSRNOG00000021031 | 329.4676 | 490.5118 | 224.2524 | 313.0396 | 458.8697 | 204.3431 |
| Trpv2       | ENSRNOG00000003104 | 1.825119 | 3.199266 | 1.642052 | 1.304476 | 2.788287 | 1.396289 |
| Atg12       | ENSRNOG00000000157 | 36.58335 | 25.13907 | 29.57062 | 32.106   | 23.00558 | 25.44614 |
| Txn14a      | ENSRNOG00000052004 | 24.14987 | 17.19867 | 24.50418 | 22.85606 | 14.79858 | 21.75544 |
| Pex13       | ENSRNOG00000054896 | 11.03263 | 10.38386 | 11.41153 | 9.540808 | 9.127771 | 10.71271 |
| Eef1d       | ENSRNOG00000021638 | 146.0824 | 130.3785 | 166.0773 | 127.5655 | 96.12743 | 145.8266 |
| Clca4l      | ENSRNOG00000036877 | 0.117138 | 0.205243 | 0.229228 | 0.013903 | 0.051509 | 0.153082 |

|                    |                    |          |          |          |          |          |          |
|--------------------|--------------------|----------|----------|----------|----------|----------|----------|
| Iqcc               | ENSRNOG00000048553 | 3.597345 | 3.640286 | 4.133791 | 3.175697 | 3.08853  | 3.873329 |
| Nudt21             | ENSRNOG00000042983 | 34.08046 | 32.42335 | 45.68918 | 32.80237 | 30.02288 | 42.97016 |
| Tesk2              | ENSRNOG00000017282 | 1.71242  | 1.89924  | 2.381015 | 1.431519 | 1.767907 | 2.14432  |
| Dcdc2              | ENSRNOG00000017511 | 0.016595 | 0.005131 | 0.010255 | 0.005909 | 0        | 0        |
| Gpr85              | ENSRNOG00000024636 | 0.027671 | 0.025668 | 0.02565  | 0        | 0        | 0.012517 |
| Rgs17              | ENSRNOG00000018690 | 5.179193 | 7.360021 | 3.670455 | 4.068802 | 6.271213 | 3.132972 |
| AABR0705144<br>5.1 | ENSRNOG00000048676 | 0.124335 | 0.076889 | 0.038418 | 0.04427  | 0        | 0        |
| AABR0704471<br>1.1 | ENSRNOG00000047276 | 345.0937 | 202.7045 | 469.6195 | 315.0514 | 139.4133 | 410.6654 |
| Mbnl1              | ENSRNOG00000014076 | 155.8462 | 201.6359 | 168.2635 | 145.9871 | 196.5233 | 162.1529 |
| Dhps               | ENSRNOG00000004219 | 32.67426 | 24.53469 | 30.42674 | 28.43951 | 20.5293  | 28.40828 |
| Bak1               | ENSRNOG00000000485 | 15.12345 | 12.68767 | 13.89856 | 14.86767 | 12.17572 | 13.36423 |
| Dnase111           | ENSRNOG00000055641 | 30.80534 | 30.23184 | 35.48174 | 26.05332 | 27.68859 | 30.03935 |
| Gng2               | ENSRNOG00000048980 | 1.508964 | 0.659292 | 1.317661 | 1.226398 | 0.486831 | 0.949721 |
| Ost4               | ENSRNOG00000008605 | 249.5076 | 204.5416 | 281.2127 | 231.2495 | 196.0655 | 266.0384 |
| Ppm1m              | ENSRNOG00000046535 | 20.33654 | 17.30069 | 19.02317 | 19.2616  | 15.23971 | 16.72031 |
| Med28              | ENSRNOG00000003592 | 25.30838 | 23.04276 | 26.49228 | 23.04015 | 18.85095 | 24.05221 |
| Pip4k2c            | ENSRNOG00000005138 | 19.78256 | 25.43696 | 19.01518 | 19.07856 | 23.95835 | 17.96213 |
| Lsm7               | ENSRNOG00000019552 | 67.09602 | 45.67989 | 69.32774 | 58.76634 | 35.32353 | 52.90771 |
| Rpp21              | ENSRNOG00000000786 | 21.33977 | 19.01546 | 28.55447 | 18.49552 | 14.48392 | 26.24952 |
| Dut                | ENSRNOG00000007221 | 105.0492 | 53.96182 | 121.8228 | 91.2116  | 36.63352 | 113.8109 |
| Eif4h              | ENSRNOG00000001454 | 191.9691 | 145.771  | 207.0761 | 182.8883 | 127.585  | 187.8283 |
| Ccdc32             | ENSRNOG00000010472 | 17.75715 | 17.4302  | 15.81177 | 14.62062 | 15.94865 | 13.54866 |
| Nt5c3b             | ENSRNOG00000016475 | 18.84151 | 13.11592 | 16.42607 | 17.42706 | 10.13198 | 14.32166 |
| Tube1              | ENSRNOG00000000598 | 5.432304 | 2.544107 | 5.035524 | 5.024247 | 1.822136 | 4.639128 |
| Cxcl1              | ENSRNOG00000002802 | 560.6826 | 336.1597 | 402.9438 | 469.224  | 237.467  | 357.0028 |
| Cebpg              | ENSRNOG00000021144 | 26.10968 | 30.24388 | 28.35861 | 24.14525 | 27.98527 | 27.32102 |
| Il33               | ENSRNOG00000016456 | 0.153512 | 0.01424  | 0.11384  | 0.131183 | 0        | 0.083334 |
| Tubb4b             | ENSRNOG00000010170 | 456.0386 | 226.8133 | 573.4094 | 395.9521 | 129.3617 | 523.8791 |
| Ccdc169            | ENSRNOG00000038095 | 0.033068 | 0.015337 | 0.030653 | 0        | 0        | 0        |
| Chmp4c             | ENSRNOG00000010238 | 22.35012 | 24.51956 | 19.9957  | 20.7478  | 23.74743 | 18.91859 |
| Tmem109            | ENSRNOG00000028017 | 81.8333  | 55.85847 | 88.58168 | 75.1249  | 42.16299 | 74.25378 |
| Krtcap2            | ENSRNOG00000020542 | 48.10804 | 43.31055 | 57.70696 | 42.4266  | 34.46019 | 53.3402  |
| Pfdn5              | ENSRNOG00000012985 | 151.6565 | 159.8539 | 148.5908 | 143.7189 | 142.4203 | 134.3571 |
| Copg2              | ENSRNOG00000011014 | 22.76228 | 21.50106 | 26.28139 | 21.19809 | 18.80989 | 22.85623 |
| LOC10036504<br>3   | ENSRNOG00000059382 | 1036.297 | 146.6372 | 301.3825 | 983.9878 | 66.11053 | 261.9703 |
| Csf3r              | ENSRNOG00000008759 | 0.01833  | 0.008502 | 0.025487 | 0        | 0        | 0.008292 |
| Coasy              | ENSRNOG00000019918 | 15.41569 | 15.41556 | 15.02736 | 14.35149 | 14.59292 | 13.36122 |
| Crep               | ENSRNOG00000000901 | 17.40142 | 13.16586 | 11.82746 | 16.1215  | 12.52781 | 10.44456 |
| Set                | ENSRNOG00000034241 | 42.54195 | 28.17094 | 37.2927  | 37.77303 | 25.18893 | 34.90562 |
| Phospho2           | ENSRNOG00000007979 | 8.262954 | 11.35647 | 10.15742 | 6.691197 | 10.20582 | 9.429579 |
| Qpct               | ENSRNOG00000005705 | 2.165351 | 1.848823 | 2.782697 | 1.73473  | 0.900768 | 1.981348 |
| AABR0706681<br>8.1 | ENSRNOG00000022934 | 446.2712 | 425.9829 | 519.3588 | 398.0314 | 351.3566 | 482.81   |
| 2-Sep              | ENSRNOG00000017952 | 159.0338 | 153.7538 | 196.3716 | 150.079  | 135.3884 | 177.1543 |
| Ap2s1              | ENSRNOG00000015865 | 126.2194 | 110.9019 | 137.5105 | 112.9467 | 88.13605 | 125.5078 |
| Pdxk               | ENSRNOG00000049937 | 19.67705 | 12.48863 | 18.84325 | 18.80606 | 11.32962 | 18.31132 |
| Gabarapl1          | ENSRNOG00000053362 | 69.66413 | 123.4163 | 76.81795 | 64.94527 | 116.1893 | 66.69536 |
| Exoc3              | ENSRNOG00000039776 | 23.87587 | 25.24201 | 23.49094 | 22.6752  | 23.99248 | 21.27669 |
| Psma3              | ENSRNOG00000007851 | 54.3033  | 43.84448 | 65.85758 | 50.9731  | 36.60781 | 60.48008 |
| Prdx5              | ENSRNOG00000021125 | 412.2583 | 286.1599 | 470.6132 | 378.6275 | 212.5233 | 404.6286 |
| Nipa2              | ENSRNOG00000012690 | 29.10715 | 28.89992 | 30.1332  | 26.92636 | 24.81037 | 27.78366 |
| Nr1h2              | ENSRNOG00000019812 | 43.2672  | 51.33068 | 41.47087 | 39.51219 | 48.15205 | 39.76918 |
| Abcf2              | ENSRNOG00000010609 | 54.88741 | 37.44799 | 46.23038 | 47.49252 | 29.29671 | 42.50021 |

|             |                    |          |          |          |          |          |          |
|-------------|--------------------|----------|----------|----------|----------|----------|----------|
| Ndufv3      | ENSRNOG00000001182 | 38.55879 | 37.15    | 34.49456 | 34.48557 | 32.29867 | 32.29763 |
| Mtfr11      | ENSRNOG00000016937 | 53.89791 | 62.91121 | 65.11578 | 49.34154 | 53.97124 | 55.12663 |
| Mcpt111     | ENSRNOG00000053494 | 0.218309 | 1.316285 | 1.281635 | 0.038865 | 1.007962 | 1.119243 |
| Mrpl28      | ENSRNOG00000042720 | 96.97771 | 61.15661 | 83.95837 | 91.30769 | 48.76617 | 74.6162  |
| Mettl26     | ENSRNOG00000021615 | 18.05734 | 17.45459 | 16.08661 | 16.61446 | 15.27767 | 15.03943 |
| Moap1       | ENSRNOG00000033970 | 0.311525 | 0.288973 | 0.211765 | 0.221842 | 0.246575 | 0.15032  |
| Zfp281      | ENSRNOG00000058643 | 21.65871 | 18.7788  | 22.69891 | 18.45831 | 17.25502 | 20.5414  |
| Npepo       | ENSRNOG00000017505 | 20.81054 | 18.97448 | 20.48113 | 19.74802 | 18.42659 | 19.27323 |
| Agpat2      | ENSRNOG00000019466 | 20.69104 | 27.12218 | 26.03415 | 18.26103 | 23.22333 | 24.09058 |
| AC130232.2  | ENSRNOG00000060701 | 7.358116 | 8.72532  | 7.898854 | 5.293855 | 6.179259 | 6.74871  |
| Homez       | ENSRNOG00000014887 | 2.39085  | 2.990033 | 4.076261 | 1.618956 | 2.323233 | 3.727491 |
| Tmem115     | ENSRNOG00000021899 | 32.81476 | 37.12221 | 30.29074 | 31.36898 | 33.943   | 27.88865 |
| Gga2        | ENSRNOG00000018599 | 19.89075 | 26.67188 | 19.52833 | 19.0336  | 25.60469 | 19.0482  |
| Wdr3        | ENSRNOG00000019670 | 18.30274 | 16.10243 | 16.07081 | 16.12801 | 14.03733 | 15.07013 |
| Nr1i2       | ENSRNOG00000002906 | 0.016081 | 0.044751 | 0.044719 | 0        | 0.01591  | 0.029098 |
| Tfap2a      | ENSRNOG00000015522 | 0.022723 | 0.052694 | 0.094783 | 0        | 0.011241 | 0.071953 |
| Nudt5       | ENSRNOG00000017741 | 31.0358  | 21.5079  | 30.0332  | 28.27555 | 16.05545 | 26.7447  |
| Acadv1      | ENSRNOG00000018114 | 49.97933 | 41.48365 | 48.77388 | 43.73692 | 32.4087  | 44.53213 |
| Rtraf       | ENSRNOG00000000340 | 122.3942 | 118.7808 | 134.4569 | 113.3636 | 98.70996 | 118.9176 |
| Cyp4f17     | ENSRNOG00000062306 | 1.357347 | 3.365195 | 1.978813 | 0.975376 | 2.551586 | 1.161065 |
| Ankzf1      | ENSRNOG00000019052 | 26.30975 | 24.1308  | 20.30163 | 22.05547 | 21.22295 | 18.31141 |
| Rbx1        | ENSRNOG00000058914 | 256.0691 | 172.6633 | 256.5251 | 231.087  | 120.6543 | 222.8459 |
| Usp20       | ENSRNOG00000007710 | 13.42038 | 20.39665 | 13.73407 | 12.56736 | 18.98633 | 11.84731 |
| Irf8        | ENSRNOG00000017869 | 14.49057 | 7.862289 | 17.07996 | 12.91981 | 7.161877 | 15.77754 |
| AABR0702905 | ENSRNOG00000032439 | 37.1327  | 26.50412 | 34.91375 | 33.1153  | 22.22627 | 32.96759 |
| 4.1         |                    |          |          |          |          |          |          |
| Opa3        | ENSRNOG00000025890 | 8.704164 | 9.98766  | 10.14841 | 8.06047  | 9.148897 | 8.824617 |
| Xab2        | ENSRNOG00000000988 | 19.46046 | 15.61902 | 18.41305 | 18.66105 | 14.65001 | 16.81581 |
| Gart        | ENSRNOG00000028292 | 50.03604 | 40.86349 | 38.01549 | 42.71998 | 31.44944 | 33.80221 |
| Parp1       | ENSRNOG00000003084 | 40.12908 | 25.51817 | 38.29971 | 37.68352 | 20.53513 | 32.87954 |
| Plcd1       | ENSRNOG00000032238 | 25.85351 | 33.43514 | 28.14954 | 25.10286 | 32.46787 | 26.60856 |
| Npl         | ENSRNOG00000002775 | 0.564872 | 0.413669 | 0.413379 | 0.412841 | 0.32356  | 0.336226 |
| Sf3b3       | ENSRNOG00000017724 | 77.65657 | 55.36925 | 76.10161 | 72.10907 | 51.42218 | 73.56899 |
| Rpl3        | ENSRNOG00000016896 | 418.9739 | 505.3761 | 461.1914 | 388.7123 | 439.6932 | 415.6619 |
| Mccc1       | ENSRNOG00000013293 | 5.377221 | 9.142232 | 4.913862 | 4.848884 | 8.681035 | 4.010525 |
| Sival       | ENSRNOG00000028640 | 37.97415 | 19.5542  | 27.47883 | 31.07487 | 13.49784 | 24.417   |
| Thap6       | ENSRNOG00000058724 | 5.896537 | 4.76956  | 6.427838 | 4.887661 | 3.920416 | 4.737346 |
| Clec2g      | ENSRNOG00000059538 | 273.2526 | 203.3793 | 283.8642 | 252.8285 | 191.6588 | 273.2806 |
| Fam229b     | ENSRNOG00000024918 | 7.096342 | 5.286835 | 6.526223 | 6.56547  | 4.643826 | 5.459837 |
| Ndufa11     | ENSRNOG00000048320 | 241.4989 | 178.7424 | 257.52   | 207.3576 | 124.5221 | 231.3297 |
| Ccl5        | ENSRNOG00000010906 | 10.81691 | 0.31955  | 0.319326 | 10.22965 | 0        | 0        |
| Tmem138     | ENSRNOG00000020693 | 8.995396 | 5.592633 | 10.7974  | 7.522058 | 4.151706 | 10.12406 |
| Map3k9      | ENSRNOG00000007271 | 0.040517 | 0.159732 | 0.122062 | 0        | 0.070152 | 0.036657 |
| Nat8b       | ENSRNOG00000015851 | 6.21932  | 5.228243 | 7.67473  | 5.771386 | 4.307317 | 7.103942 |
| Oaz1        | ENSRNOG00000019459 | 760.577  | 753.4423 | 1083.193 | 691.4542 | 605.4294 | 931.3703 |
| Mvp         | ENSRNOG00000020182 | 83.17228 | 61.93532 | 54.25611 | 78.47139 | 52.51037 | 48.61907 |
| Pkm         | ENSRNOG00000011329 | 1219.487 | 712.6503 | 1618.764 | 1104.573 | 491.9852 | 1357.432 |
| Prtfdc1     | ENSRNOG00000024874 | 16.79237 | 15.00869 | 19.0913  | 14.21892 | 13.8398  | 16.59249 |
| Jpt2        | ENSRNOG00000024661 | 51.75034 | 33.09628 | 42.85812 | 46.79631 | 24.33358 | 38.28782 |
| Psm8        | ENSRNOG00000037580 | 70.82179 | 81.14984 | 96.49129 | 60.12398 | 58.6241  | 82.03454 |
| Otub1       | ENSRNOG00000021175 | 68.71026 | 47.42538 | 58.40976 | 63.88443 | 45.16651 | 53.42535 |
| Tf          | ENSRNOG00000030625 | 16.70254 | 18.53886 | 19.68574 | 14.45692 | 13.71994 | 16.49283 |
| Kif22       | ENSRNOG00000020281 | 93.42661 | 28.73994 | 104.1684 | 84.83167 | 14.09705 | 96.78362 |
| Rbm10       | ENSRNOG00000008472 | 21.85981 | 18.79187 | 23.38774 | 20.26387 | 17.80526 | 21.18584 |
| Rps27a      | ENSRNOG00000004426 | 1046.114 | 1084.787 | 1186.23  | 944.9046 | 881.1241 | 1064.755 |
| Syf2        | ENSRNOG00000060597 | 49.16312 | 50.42572 | 40.82928 | 44.53349 | 47.22172 | 33.89884 |

|             |                    |          |          |          |          |          |          |
|-------------|--------------------|----------|----------|----------|----------|----------|----------|
| Tmem161b    | ENSRNOG00000032414 | 11.74535 | 11.20502 | 12.15012 | 11.3107  | 10.24757 | 11.20784 |
| Eif3d       | ENSRNOG00000005804 | 133.8209 | 98.03781 | 128.31   | 121.2801 | 74.12468 | 114.975  |
| Stap2       | ENSRNOG00000047306 | 5.774726 | 7.947827 | 6.971263 | 4.963424 | 6.457509 | 6.172367 |
| Rpl30l1     | ENSRNOG00000057677 | 0.3237   | 0.200178 | 0.200037 | 0.115256 | 0.106755 | 0        |
| Ube2d3      | ENSRNOG00000013741 | 160.8281 | 136.3976 | 159.9107 | 144.2878 | 114.3416 | 150.1801 |
| Mesd        | ENSRNOG00000012366 | 128.2741 | 107.6751 | 125.0903 | 119.3204 | 89.51954 | 114.2132 |
| Cavin2      | ENSRNOG00000025895 | 46.67445 | 44.01649 | 31.041   | 46.05813 | 43.488   | 29.98811 |
| Coq3        | ENSRNOG00000009974 | 15.59512 | 11.23664 | 14.29601 | 13.95365 | 8.682709 | 13.09431 |
| Cox10       | ENSRNOG00000024972 | 4.545492 | 3.853993 | 3.887513 | 3.937171 | 2.938029 | 3.464399 |
| Klhdc9      | ENSRNOG00000004022 | 0.990852 | 0.402116 | 0.707994 | 0.727652 | 0.265507 | 0.560291 |
| Pccb        | ENSRNOG00000015869 | 28.56922 | 24.43538 | 26.70066 | 26.66846 | 20.77855 | 24.65204 |
| Maoa        | ENSRNOG00000002848 | 44.6696  | 34.11189 | 40.48786 | 40.91778 | 31.63955 | 38.75095 |
| Hadh        | ENSRNOG00000010697 | 25.2591  | 24.03942 | 19.34395 | 21.3238  | 20.08686 | 17.54929 |
| Snpc2       | ENSRNOG00000001056 | 16.71543 | 16.81281 | 13.77971 | 15.80838 | 15.33961 | 13.07087 |
| Fdxr        | ENSRNOG00000058497 | 5.119411 | 3.632556 | 4.405171 | 4.793043 | 3.491067 | 4.133514 |
| Tkt         | ENSRNOG00000016064 | 186.2271 | 210.8469 | 293.2663 | 167.5041 | 169.2794 | 252.298  |
| Tmsb4x      | ENSRNOG00000047931 | 1810.703 | 1757.026 | 2275.374 | 1617.867 | 1625.058 | 2188.126 |
| Qars        | ENSRNOG00000060912 | 70.12157 | 85.96406 | 79.1663  | 67.36989 | 80.55336 | 72.81535 |
| Timm23      | ENSRNOG00000019811 | 62.02436 | 47.90834 | 63.60101 | 57.82997 | 42.68943 | 54.97339 |
| Tax1bp3     | ENSRNOG00000019357 | 64.56259 | 77.84487 | 71.92218 | 60.63962 | 68.85186 | 63.82991 |
| Blmh        | ENSRNOG00000003563 | 35.85813 | 26.10308 | 40.51383 | 33.5786  | 22.57922 | 38.87594 |
| Tcp1        | ENSRNOG00000014160 | 108.4733 | 75.21218 | 119.2987 | 93.17318 | 54.92831 | 110.4425 |
| Xrcc1       | ENSRNOG00000019915 | 18.43125 | 11.86732 | 17.15201 | 15.17118 | 9.815055 | 15.61288 |
| Rps3a       | ENSRNOG00000011893 | 373.0678 | 431.5867 | 437.5496 | 353.9442 | 388.3589 | 406.4942 |
| Nsmce1      | ENSRNOG00000015218 | 22.46283 | 14.83921 | 21.17225 | 20.81399 | 11.16717 | 18.63452 |
| Edem2       | ENSRNOG00000019299 | 18.19659 | 16.23224 | 19.23227 | 16.96758 | 14.00049 | 16.3911  |
| Zfp11       | ENSRNOG00000050180 | 10.26222 | 10.17874 | 9.766102 | 9.949382 | 9.810646 | 9.136245 |
| Shc1        | ENSRNOG00000020657 | 77.20096 | 82.05296 | 72.16406 | 74.16267 | 75.33119 | 67.5996  |
| Fam207a     | ENSRNOG00000001225 | 17.71594 | 14.75003 | 17.36321 | 15.62361 | 13.70169 | 14.93375 |
| Cnbp        | ENSRNOG00000010239 | 351.7088 | 291.0142 | 375.4526 | 302.2591 | 223.3562 | 345.7646 |
| Pnma1       | ENSRNOG00000010553 | 0.714821 | 0.487555 | 1.500617 | 0.404235 | 0.353617 | 1.255416 |
| Hsd11b1     | ENSRNOG00000005861 | 42.84893 | 80.22182 | 30.23425 | 34.87589 | 70.3376  | 25.98327 |
| Gltp        | ENSRNOG00000001192 | 21.0175  | 17.89071 | 20.74882 | 19.04511 | 16.22101 | 19.90131 |
| Rpl21       | ENSRNOG00000032803 | 348.8546 | 346.5488 | 379.3534 | 319.8589 | 283.1896 | 337.6996 |
| AC128960.1  | ENSRNOG00000038045 | 59.44549 | 66.39898 | 78.17202 | 50.06587 | 44.80694 | 61.9776  |
| RGD1310352  | ENSRNOG00000006148 | 106.2438 | 106.4005 | 121.4762 | 98.99115 | 91.93619 | 113.18   |
| Capn2       | ENSRNOG00000034015 | 154.5267 | 151.7604 | 149.0278 | 147.2112 | 135.1364 | 137.1371 |
| Pofut1      | ENSRNOG00000010104 | 35.59238 | 33.50985 | 33.44345 | 32.71306 | 30.33451 | 27.79172 |
| Nthl1       | ENSRNOG00000012213 | 21.06183 | 16.08941 | 20.49521 | 19.4098  | 14.92939 | 17.96337 |
| Lypla2      | ENSRNOG00000010067 | 28.21683 | 29.57342 | 30.66235 | 26.09568 | 24.77513 | 27.29721 |
| G6pc3       | ENSRNOG00000020902 | 19.22128 | 18.3034  | 18.47987 | 18.26857 | 16.08765 | 16.76676 |
| Armc1       | ENSRNOG00000013253 | 28.9234  | 22.1575  | 29.71834 | 27.54477 | 20.32094 | 28.92422 |
| Cnot10      | ENSRNOG00000052305 | 27.0802  | 22.32475 | 21.8436  | 21.8289  | 16.89359 | 19.4502  |
| Zbed5       | ENSRNOG00000000918 | 25.14856 | 23.39808 | 28.39406 | 23.32972 | 20.53296 | 24.28351 |
| Ap3s1       | ENSRNOG00000003829 | 47.68888 | 52.5852  | 51.78994 | 40.9206  | 49.69797 | 46.21293 |
| Tagln2      | ENSRNOG00000008301 | 599.5125 | 379.9443 | 867.2647 | 555.682  | 278.2142 | 775.077  |
| Tbl3        | ENSRNOG00000013429 | 28.51982 | 23.48715 | 29.78192 | 24.70531 | 17.10084 | 26.70198 |
| Hddc2       | ENSRNOG00000021442 | 20.11662 | 15.56777 | 18.28063 | 18.83224 | 12.77489 | 16.48769 |
| Rnf4        | ENSRNOG00000013930 | 82.35165 | 78.91786 | 96.21013 | 77.26451 | 69.78129 | 91.5476  |
| Zfp277      | ENSRNOG00000045854 | 22.59595 | 22.50139 | 19.98038 | 19.45112 | 19.46297 | 18.59959 |
| Tnfrsf12a   | ENSRNOG00000003546 | 236.7585 | 183.5224 | 242.9951 | 199.4207 | 127.6546 | 217.8744 |
| Vps36       | ENSRNOG00000012654 | 24.15221 | 19.4533  | 29.65925 | 21.96928 | 18.50863 | 27.63147 |
| AABR0702695 | ENSRNOG00000019533 | 2.224539 | 3.231991 | 2.335341 | 2.061279 | 3.155548 | 2.158127 |
| 7.1         |                    |          |          |          |          |          |          |
| Acs15       | ENSRNOG00000016265 | 91.5844  | 90.79041 | 107.3    | 80.64324 | 74.24064 | 99.82571 |
| Bag2        | ENSRNOG00000012709 | 47.45594 | 46.71019 | 40.36123 | 39.95419 | 32.84745 | 33.11973 |

|              |                    |          |          |          |          |          |          |
|--------------|--------------------|----------|----------|----------|----------|----------|----------|
| Dmap1        | ENSRNOG00000019407 | 16.5658  | 15.47793 | 16.29052 | 14.54081 | 12.75568 | 15.11812 |
| Plpp1        | ENSRNOG00000009980 | 97.8623  | 88.20049 | 124.6229 | 90.78316 | 72.76273 | 114.7171 |
| Mrps18c      | ENSRNOG00000002178 | 46.59993 | 29.44913 | 38.42055 | 40.80316 | 21.2158  | 34.81218 |
| Cpt1c        | ENSRNOG00000026163 | 18.60952 | 15.78236 | 13.29788 | 17.3659  | 15.25488 | 12.25741 |
| Wdr53        | ENSRNOG00000001754 | 6.820099 | 6.350256 | 5.582403 | 6.377862 | 5.347243 | 4.889779 |
| Wisp2        | ENSRNOG00000010666 | 714.4531 | 748.855  | 517.9133 | 678.5652 | 670.9956 | 468.6298 |
| Dynlrb1      | ENSRNOG00000025715 | 133.0769 | 97.87593 | 129.6516 | 124.4722 | 79.21323 | 109.713  |
| Cept1        | ENSRNOG00000017723 | 27.11686 | 22.37722 | 24.80786 | 24.25463 | 21.15131 | 22.19418 |
| Dusp14l1     | ENSRNOG00000046368 | 9.874734 | 9.568292 | 17.78223 | 8.599596 | 8.338662 | 15.42127 |
| Mapkap1      | ENSRNOG00000017583 | 17.35752 | 17.34105 | 17.48753 | 15.17084 | 15.92471 | 16.49752 |
| LOC100362339 | ENSRNOG00000018471 | 552.9622 | 634.6655 | 668.7474 | 503.3404 | 518.0903 | 563.0382 |
| Rad51        | ENSRNOG00000037302 | 40.70279 | 11.52458 | 27.41797 | 37.92499 | 5.811747 | 24.09573 |
| Tyk2         | ENSRNOG00000032948 | 7.232127 | 7.934589 | 7.048028 | 6.987557 | 7.610842 | 6.523061 |
| Hsd17b1      | ENSRNOG00000019830 | 0.687036 | 2.132505 | 0.808315 | 0.592745 | 1.908511 | 0.621591 |
| Phb          | ENSRNOG00000046799 | 68.40466 | 54.90025 | 73.89631 | 62.98898 | 42.17096 | 64.31103 |
| Xkr5         | ENSRNOG00000028636 | 18.6798  | 5.67461  | 17.20359 | 17.28426 | 3.03479  | 15.80906 |
| Fam45a       | ENSRNOG00000010230 | 26.79591 | 21.75584 | 23.06067 | 22.38284 | 18.77658 | 21.11437 |
| Zfp287       | ENSRNOG00000003215 | 5.085293 | 4.519346 | 4.713858 | 4.257973 | 4.171126 | 3.992378 |
| Nfyc         | ENSRNOG00000010735 | 15.94578 | 14.82609 | 17.1696  | 11.70762 | 12.96854 | 14.27479 |
| Mrpl14       | ENSRNOG00000019734 | 44.34537 | 27.50224 | 40.59448 | 37.06912 | 20.17228 | 37.39261 |
| Vdac3        | ENSRNOG00000019277 | 220.051  | 168.131  | 219.543  | 200.2841 | 127.339  | 195.9431 |
| Hmox2        | ENSRNOG00000003773 | 20.58836 | 21.69325 | 22.00001 | 17.80793 | 20.50347 | 19.36038 |
| Prkar1b      | ENSRNOG00000028733 | 4.183749 | 4.657058 | 7.303876 | 3.426215 | 3.173497 | 5.488564 |
| Atg16l1      | ENSRNOG00000017913 | 16.22396 | 16.14553 | 16.36591 | 14.21111 | 14.66915 | 15.51111 |
| Fn3krp       | ENSRNOG00000036660 | 9.342585 | 7.657273 | 8.066273 | 8.515216 | 7.208987 | 7.643772 |
| Atp5mg       | ENSRNOG00000028884 | 338.4934 | 290.9148 | 356.2378 | 314.1456 | 232.4834 | 308.3148 |
| Dctn2        | ENSRNOG00000025481 | 142.9696 | 153.7151 | 161.1804 | 135.2842 | 135.3122 | 145.1286 |
| Tmx4         | ENSRNOG00000024852 | 26.94766 | 24.03249 | 24.38145 | 24.69933 | 21.24072 | 23.22037 |
| Pagr1        | ENSRNOG00000020217 | 5.075541 | 5.530893 | 4.659141 | 4.789927 | 5.314195 | 4.190811 |
| Ngly1        | ENSRNOG00000006143 | 22.19858 | 24.69854 | 22.94873 | 21.37186 | 23.05429 | 20.95722 |
| Pnkp         | ENSRNOG00000020318 | 21.52111 | 14.19442 | 22.13142 | 17.09979 | 12.17003 | 17.30565 |
| Fam83c       | ENSRNOG00000046772 | 0.048264 | 0.059693 | 0.089477 | 0.017185 | 0        | 0.014555 |
| Tas1r1       | ENSRNOG00000009708 | 0.502241 | 0.588484 | 0.637078 | 0.33883  | 0.496911 | 0.418526 |
| Ezr          | ENSRNOG00000018524 | 30.91385 | 21.45981 | 34.52373 | 28.01116 | 15.01619 | 30.45318 |
| Skap2        | ENSRNOG00000012228 | 30.07622 | 32.64863 | 32.77543 | 28.57893 | 32.01616 | 31.36388 |
| Cetn3        | ENSRNOG00000048563 | 10.43739 | 10.44927 | 13.42116 | 9.075524 | 7.304187 | 11.28572 |
| Tax1bp1      | ENSRNOG00000008393 | 102.2224 | 113.118  | 122.7353 | 96.54805 | 103.9536 | 118.5597 |
| Zc2hc1a      | ENSRNOG00000022356 | 49.29232 | 50.05187 | 40.19426 | 44.4874  | 47.62163 | 37.5973  |
| Nosip        | ENSRNOG00000020543 | 36.52992 | 27.31036 | 26.02437 | 33.13142 | 20.42023 | 22.19413 |
| Lrrfip1      | ENSRNOG00000019892 | 62.17137 | 74.81734 | 74.13175 | 57.54345 | 63.77453 | 66.04376 |
| Nup107       | ENSRNOG00000006541 | 31.30308 | 15.99792 | 24.3848  | 27.40008 | 10.43961 | 22.02275 |
| Fscn3        | ENSRNOG00000007942 | 0.334327 | 0.426422 | 0.5036   | 0.17856  | 0.351453 | 0.321385 |
| Selp         | ENSRNOG00000002794 | 3.39854  | 1.215032 | 4.7364   | 2.672256 | 0.782241 | 4.398679 |
| Dvl1         | ENSRNOG00000019423 | 21.20796 | 26.20275 | 25.10074 | 20.33278 | 24.08818 | 23.48746 |
| Sf3b6        | ENSRNOG00000046172 | 63.0866  | 62.63947 | 79.53103 | 56.17424 | 49.93361 | 62.83053 |
| Aldh3a2      | ENSRNOG00000002342 | 28.5873  | 38.70557 | 35.56452 | 27.37284 | 35.76211 | 32.95255 |
| Nek6         | ENSRNOG00000010897 | 106.1877 | 96.74434 | 131.0554 | 93.67844 | 70.35003 | 115.765  |
| Clptm11      | ENSRNOG00000016923 | 55.78777 | 56.60024 | 61.42327 | 54.47337 | 53.47631 | 59.18707 |
| Phldb1       | ENSRNOG00000026985 | 49.95738 | 46.85683 | 48.85557 | 48.29212 | 42.83686 | 45.21056 |
| Pgam5        | ENSRNOG00000037443 | 30.91396 | 25.12652 | 31.31189 | 28.63207 | 21.98824 | 29.99865 |
| Glee         | ENSRNOG00000025372 | 11.66799 | 11.4357  | 10.8305  | 11.06164 | 11.1743  | 10.21832 |
| Atg5         | ENSRNOG00000000322 | 17.96081 | 20.05743 | 22.43207 | 16.41201 | 18.21108 | 19.19489 |
| Pesk6        | ENSRNOG00000011526 | 0.715136 | 0.268705 | 0.562208 | 0.657525 | 0.170169 | 0.515973 |
| LOC108348098 | ENSRNOG00000020117 | 50.81055 | 48.79093 | 50.24846 | 44.66111 | 45.90754 | 43.22034 |
| Mrps21       | ENSRNOG00000024845 | 46.80705 | 46.03228 | 52.12983 | 41.0304  | 35.44384 | 46.87452 |

|             |                    |          |          |          |          |          |          |
|-------------|--------------------|----------|----------|----------|----------|----------|----------|
| Hsd17b12    | ENSRNOG00000009630 | 65.46347 | 52.05208 | 69.93075 | 56.07539 | 36.43472 | 62.75921 |
| AABR0702874 | ENSRNOG00000045917 | 0.077742 | 0.072114 | 0.144126 | 0        | 0        | 0        |
| 9.1         |                    |          |          |          |          |          |          |
| Fan1        | ENSRNOG00000023985 | 2.941771 | 3.613833 | 3.289702 | 2.725408 | 3.275261 | 2.785796 |
| Mst1        | ENSRNOG00000019680 | 0.213694 | 0.325655 | 0.367874 | 0.130436 | 0.271834 | 0.331437 |
| Emg1        | ENSRNOG00000012828 | 29.51757 | 16.92005 | 30.97933 | 25.12301 | 14.79521 | 25.75801 |
| Rps27       | ENSRNOG00000016961 | 1747.572 | 1684.309 | 1554.59  | 1586.301 | 1613.553 | 1384.521 |
| Arpc2       | ENSRNOG00000014289 | 72.62869 | 67.92636 | 86.86022 | 69.00676 | 59.26142 | 80.70753 |
| Arhgef25    | ENSRNOG00000005034 | 78.20359 | 96.36443 | 96.0488  | 74.30851 | 92.57635 | 88.62835 |
| Dmd         | ENSRNOG00000046366 | 0.548673 | 0.658646 | 0.3989   | 0.491272 | 0.633325 | 0.362573 |
| Birc5       | ENSRNOG00000050819 | 39.14058 | 15.08143 | 63.51293 | 35.46872 | 6.468376 | 57.71014 |
| Set         | ENSRNOG00000025892 | 19.35731 | 14.39076 | 17.98185 | 16.66    | 12.32033 | 16.88071 |
| Tmem9       | ENSRNOG00000010204 | 71.36254 | 56.73352 | 62.48747 | 66.09809 | 46.48565 | 57.15496 |
| Ech1        | ENSRNOG00000020308 | 28.68959 | 36.6407  | 25.17099 | 26.37495 | 34.77727 | 21.18206 |
| Crem        | ENSRNOG00000014900 | 3.244491 | 4.129823 | 3.53737  | 2.923902 | 3.433086 | 3.124812 |
| Anapc4      | ENSRNOG00000004130 | 34.61716 | 32.9111  | 38.75766 | 30.20022 | 25.9006  | 35.66648 |
| Faf1        | ENSRNOG00000008523 | 48.78127 | 45.68485 | 47.25902 | 41.26312 | 40.55911 | 44.07918 |
| Pex11b      | ENSRNOG00000021216 | 15.97041 | 12.70858 | 12.37785 | 13.40772 | 11.57323 | 10.77643 |
| LOC10091142 | ENSRNOG00000051591 | 82.29243 | 58.3988  | 75.85965 | 71.04199 | 45.13934 | 70.49874 |
| Coa3        | ENSRNOG00000020487 | 52.71422 | 37.52875 | 44.19417 | 46.59973 | 32.42328 | 41.72534 |
| Rad17       | ENSRNOG00000018353 | 11.45636 | 12.45492 | 13.27762 | 10.66962 | 10.9314  | 12.49217 |
| AABR0700687 | ENSRNOG00000051256 | 7.250215 | 7.13652  | 6.705978 | 6.57775  | 6.311844 | 6.37339  |
| 3.1         |                    |          |          |          |          |          |          |
| Laptm4b     | ENSRNOG00000006766 | 59.79371 | 60.77004 | 64.95331 | 56.52225 | 58.49459 | 59.76919 |
| RGD1563300  | ENSRNOG00000025630 | 0.231785 | 0.215006 | 0.214855 | 0.082529 | 0.152883 | 0.069902 |
| Cd3eap      | ENSRNOG00000016825 | 13.9889  | 11.33712 | 13.99086 | 12.46527 | 7.648655 | 10.4748  |
| Tex2        | ENSRNOG00000013659 | 11.80173 | 9.264583 | 13.45298 | 10.44301 | 8.687185 | 12.07414 |
| Rpl21       | ENSRNOG00000000957 | 813.5648 | 764.4052 | 827.5737 | 752.5223 | 668.1725 | 785.5132 |
| Mocs2       | ENSRNOG00000056325 | 35.72958 | 28.93443 | 33.57986 | 33.64718 | 23.96436 | 28.67016 |
| Dmac1       | ENSRNOG00000023946 | 13.21971 | 18.21433 | 15.80663 | 11.68314 | 15.33741 | 14.3759  |
| AC114111.1  | ENSRNOG00000052955 | 0.486073 | 0.676328 | 0.45057  | 0.129803 | 0        | 0.109943 |
| Ndufs1      | ENSRNOG00000011849 | 43.46837 | 34.14106 | 47.32787 | 41.16285 | 28.4561  | 42.22509 |
| Cmtr1       | ENSRNOG00000000532 | 64.45437 | 37.38843 | 53.69628 | 60.82472 | 32.55781 | 51.73058 |
| Ppil1       | ENSRNOG00000000523 | 45.55049 | 30.2186  | 40.36921 | 42.30681 | 22.36387 | 32.86059 |
| Ino80c      | ENSRNOG00000016532 | 12.24555 | 9.259532 | 12.92468 | 11.45309 | 7.722963 | 10.96093 |
| Lmo1        | ENSRNOG00000014629 | 10.30824 | 5.635294 | 8.866377 | 9.354177 | 4.763718 | 8.478462 |
| Pycr2       | ENSRNOG00000003267 | 37.31636 | 35.34917 | 41.28015 | 33.84279 | 27.08563 | 35.65724 |
| Pus11       | ENSRNOG00000022354 | 10.91266 | 10.36207 | 8.799882 | 9.628536 | 9.702564 | 8.13868  |
| Cox6c       | ENSRNOG00000010807 | 273.0695 | 241.2507 | 321.9603 | 246.8318 | 181.5238 | 284.7457 |
| Bscl2       | ENSRNOG00000052393 | 37.84716 | 34.76949 | 39.93235 | 34.02549 | 25.29124 | 32.68413 |
| Eva1a       | ENSRNOG00000007118 | 4.831137 | 2.84089  | 7.417128 | 3.824298 | 1.792447 | 6.985692 |
| Hsd3b7      | ENSRNOG00000019080 | 90.13887 | 116.5817 | 63.40798 | 78.85507 | 103.3801 | 58.122   |
| Eme2        | ENSRNOG00000024867 | 21.89532 | 25.88324 | 25.92699 | 20.25062 | 23.41314 | 24.88284 |
| Rab18       | ENSRNOG00000018972 | 70.39386 | 69.24146 | 71.4934  | 65.21179 | 59.67583 | 66.83175 |
| Commd1      | ENSRNOG00000009281 | 31.03261 | 26.32126 | 31.63963 | 29.26238 | 25.57038 | 29.82237 |
| Tomm20      | ENSRNOG00000019980 | 203.4551 | 197.1501 | 201.0965 | 188.3489 | 168.6562 | 186.9518 |
| Rab3gap1    | ENSRNOG00000003953 | 43.62777 | 39.66399 | 39.14429 | 40.64155 | 34.84361 | 37.02765 |
| Qpctl       | ENSRNOG00000015413 | 10.80015 | 12.76812 | 12.30923 | 8.629187 | 9.742172 | 11.07316 |
| Coro1b      | ENSRNOG00000021828 | 200.6378 | 256.6556 | 209.5906 | 181.7897 | 222.1602 | 192.9749 |
| Tspan12     | ENSRNOG00000059016 | 6.849982 | 10.37517 | 9.531337 | 5.546997 | 7.626267 | 8.00451  |
| Knop1       | ENSRNOG00000048270 | 0.492771 | 0.396152 | 0.213163 | 0.421092 | 0.35753  | 0.178332 |
| Mrpl22      | ENSRNOG00000027039 | 52.72188 | 36.9191  | 45.78268 | 44.245   | 28.55341 | 42.28209 |
| Hpf1        | ENSRNOG00000011293 | 24.46299 | 12.32079 | 24.54639 | 21.13208 | 10.5907  | 20.20592 |
| Serinc1     | ENSRNOG00000029360 | 225.4961 | 249.0422 | 208.6526 | 205.9451 | 241.2674 | 191.3873 |
| Idh2        | ENSRNOG00000013949 | 125.2228 | 91.16915 | 133.8348 | 110.9453 | 68.50798 | 124.0674 |

|            |                    |          |          |          |          |          |          |
|------------|--------------------|----------|----------|----------|----------|----------|----------|
| Trmt2a     | ENSRNOG00000001885 | 28.02082 | 19.27621 | 21.77587 | 24.33997 | 14.24934 | 19.75102 |
| Bloc1s2    | ENSRNOG00000012684 | 21.99625 | 21.74356 | 26.43099 | 19.93586 | 16.59687 | 22.58121 |
| Dhx32      | ENSRNOG00000018119 | 3.679675 | 4.56924  | 4.032064 | 3.440789 | 4.210557 | 3.882247 |
| Snapin     | ENSRNOG00000013356 | 52.74116 | 63.99753 | 55.91867 | 50.26125 | 59.173   | 49.67755 |
| Mrpl41     | ENSRNOG00000029875 | 48.734   | 36.01665 | 42.01468 | 42.44164 | 32.40798 | 39.1284  |
| Usp5       | ENSRNOG00000015409 | 31.64438 | 25.73467 | 34.84996 | 30.37275 | 22.96267 | 33.26213 |
| Mfsd4b     | ENSRNOG00000024543 | 4.055485 | 5.196961 | 3.820728 | 3.682762 | 4.395098 | 3.369238 |
| Rab38      | ENSRNOG00000016769 | 5.427228 | 2.746006 | 4.429046 | 3.938787 | 1.669979 | 3.829521 |
| Mrps7      | ENSRNOG00000003797 | 37.77512 | 28.263   | 34.98108 | 32.70678 | 23.95972 | 32.98416 |
| Stoml2     | ENSRNOG00000009535 | 60.06703 | 46.00157 | 58.6116  | 53.71638 | 37.63868 | 55.29034 |
| Capg       | ENSRNOG00000013668 | 169.9124 | 140.9755 | 154.3183 | 159.7569 | 115.5042 | 135.3139 |
| Scarb2     | ENSRNOG00000002225 | 87.39888 | 89.56057 | 77.88486 | 79.93776 | 82.64539 | 74.91007 |
| Acat1      | ENSRNOG00000007862 | 24.49455 | 23.77298 | 25.95363 | 22.80675 | 19.561   | 21.97478 |
| Cops8      | ENSRNOG00000019635 | 45.61055 | 40.97498 | 46.2339  | 42.57653 | 36.40433 | 44.33676 |
| Mier3      | ENSRNOG00000013121 | 10.01981 | 9.746628 | 9.001068 | 8.967304 | 8.772841 | 8.582333 |
| RGD1311517 | ENSRNOG00000020199 | 6.74728  | 3.596347 | 7.068524 | 6.063263 | 2.055681 | 5.329371 |
| Camk1      | ENSRNOG00000021781 | 49.57094 | 75.80846 | 50.98288 | 45.13394 | 64.80921 | 43.23195 |
| Mrpl58     | ENSRNOG00000032780 | 24.94207 | 24.56673 | 31.69579 | 22.71878 | 19.74187 | 26.01262 |
| Hnrnpdl    | ENSRNOG00000002270 | 43.21623 | 34.51759 | 55.41908 | 39.82843 | 31.22805 | 48.82778 |
| Cox4i1     | ENSRNOG00000017817 | 390.0283 | 391.3356 | 421.9636 | 368.3339 | 342.8427 | 366.5385 |
| Ripk2      | ENSRNOG00000009389 | 43.54551 | 22.15387 | 29.34332 | 39.41809 | 19.14927 | 27.70179 |
| Klhl17     | ENSRNOG00000020302 | 2.889803 | 3.15565  | 2.865223 | 2.696079 | 3.040089 | 2.780005 |
| Atp5pb     | ENSRNOG00000016000 | 27.19264 | 24.04228 | 28.26026 | 24.32207 | 19.32264 | 26.21616 |
| Cct8       | ENSRNOG00000001592 | 120.6309 | 93.19101 | 137.2241 | 112.6426 | 73.80018 | 124.3675 |
| Ranbp3     | ENSRNOG00000049785 | 49.37017 | 33.93621 | 41.81357 | 47.20122 | 30.04894 | 40.01996 |
| Smyd2      | ENSRNOG00000003583 | 58.00449 | 40.35963 | 54.65176 | 48.61472 | 34.98054 | 50.40845 |
| Mcm3       | ENSRNOG00000012543 | 62.61179 | 18.71033 | 43.2826  | 59.52063 | 10.75746 | 36.70679 |
| Gpr132     | ENSRNOG00000013914 | 0.109427 | 0.058003 | 0.115925 | 0        | 0.015467 | 0.028287 |
| Slco1a2    | ENSRNOG00000031249 | 0.083708 | 0.110926 | 0.354716 | 0.038321 | 0.070988 | 0.27048  |
| LOC308990  | ENSRNOG00000016978 | 0.034929 | 0.032401 | 0.145702 | 0        | 0        | 0.079005 |
| Atad3a     | ENSRNOG00000018118 | 20.57553 | 13.14291 | 18.18626 | 18.06269 | 12.15752 | 15.89028 |
| Exoc3l4    | ENSRNOG00000010111 | 0.683554 | 0.322409 | 0.515493 | 0.507396 | 0.252179 | 0.345908 |
| Hint2      | ENSRNOG00000015866 | 72.72744 | 74.47634 | 48.64598 | 63.99653 | 68.91248 | 44.98723 |
| Mlf2       | ENSRNOG00000016589 | 82.70931 | 77.33402 | 91.75709 | 78.00941 | 66.11807 | 84.62232 |
| Atp6v1c2   | ENSRNOG00000050553 | 1.944462 | 1.559957 | 1.924223 | 1.768279 | 1.221888 | 1.473956 |
| Umps       | ENSRNOG00000001797 | 63.00506 | 31.87669 | 52.64332 | 54.85853 | 23.29074 | 49.24576 |
| M6pr       | ENSRNOG00000059373 | 120.9836 | 105.7367 | 129.5165 | 111.8872 | 83.26613 | 107.0325 |
| Fastkd1    | ENSRNOG00000024335 | 3.886944 | 3.801518 | 3.818437 | 3.678074 | 3.270926 | 3.430679 |
| Smpd4      | ENSRNOG00000001875 | 14.30133 | 8.107022 | 10.73453 | 13.29993 | 6.353292 | 9.945519 |
| RGD1564801 | ENSRNOG00000048095 | 2.367964 | 2.534474 | 2.82215  | 2.056875 | 1.879414 | 2.471998 |
| Bud13      | ENSRNOG00000018665 | 9.343867 | 8.409685 | 8.629184 | 8.663704 | 6.942112 | 6.866745 |
| Gmpr       | ENSRNOG00000017250 | 3.644784 | 4.402511 | 2.96536  | 3.052994 | 3.450441 | 2.562158 |
| Orai3      | ENSRNOG00000039730 | 7.402546 | 9.989009 | 7.371524 | 6.417449 | 9.486673 | 6.078618 |
| Nlrc5      | ENSRNOG00000048222 | 5.325842 | 1.134933 | 1.249372 | 4.927145 | 0.783276 | 1.095117 |
| Tmx1       | ENSRNOG00000057934 | 87.38302 | 86.66963 | 97.50374 | 76.65917 | 68.41617 | 89.48941 |
| RGD1309106 | ENSRNOG00000026523 | 0.119267 | 0.129072 | 0.092129 | 0.042466 | 0        | 0.035969 |
| Usp19      | ENSRNOG00000049531 | 40.33706 | 41.43652 | 43.92533 | 39.23268 | 39.43607 | 41.12856 |
| Timm13     | ENSRNOG00000019682 | 112.974  | 100.5986 | 119.034  | 101.8421 | 72.36292 | 98.79404 |
| Hopx       | ENSRNOG00000024689 | 4.557989 | 4.026695 | 3.286165 | 4.134556 | 3.292732 | 2.225547 |
| Ormdl2     | ENSRNOG00000030120 | 52.66818 | 55.17638 | 60.00671 | 47.91857 | 48.84357 | 49.19243 |
| Idh3a      | ENSRNOG00000010277 | 21.44575 | 18.93046 | 21.87434 | 20.75562 | 17.38226 | 20.07957 |
| Rps17      | ENSRNOG00000019106 | 1272.962 | 1338.023 | 1416.582 | 1177.721 | 1102.869 | 1259.576 |
| Hspbp1     | ENSRNOG00000017795 | 51.55185 | 34.61322 | 37.39284 | 48.63223 | 31.965   | 31.84905 |
| Sv2a       | ENSRNOG00000021182 | 6.067661 | 7.431139 | 5.314719 | 5.27899  | 6.212069 | 4.813408 |
| Adgrg5     | ENSRNOG00000039891 | 0.298009 | 0.125653 | 0.276242 | 0.245979 | 0        | 0.196088 |
| Eif2b2     | ENSRNOG00000006467 | 49.87385 | 32.4954  | 61.14192 | 45.40491 | 23.89571 | 56.99081 |

|                    |                    |          |          |          |          |          |          |
|--------------------|--------------------|----------|----------|----------|----------|----------|----------|
| Cdc5l              | ENSRNOG00000019975 | 41.3891  | 39.29263 | 42.23339 | 38.12205 | 32.54951 | 38.74479 |
| Map2k4             | ENSRNOG00000003834 | 35.26121 | 33.70734 | 40.20216 | 33.10075 | 29.06136 | 37.68614 |
| Tm9sf1             | ENSRNOG00000019710 | 42.3111  | 40.56607 | 44.25711 | 39.7088  | 33.82945 | 39.1847  |
| Ppp1r12c           | ENSRNOG00000053828 | 45.02027 | 38.79278 | 44.2916  | 39.64043 | 34.23984 | 42.23775 |
| Dimt1              | ENSRNOG00000013596 | 16.37545 | 12.05885 | 17.92045 | 15.73372 | 10.37788 | 16.55709 |
| Meis3              | ENSRNOG00000021390 | 7.998522 | 10.12877 | 6.069465 | 7.177625 | 9.273487 | 5.734016 |
| Nop16              | ENSRNOG00000017284 | 35.14375 | 24.16721 | 29.99963 | 32.43428 | 17.15357 | 24.75853 |
| Ddx59              | ENSRNOG00000042451 | 11.78218 | 7.864522 | 11.6994  | 8.888226 | 6.036109 | 10.50169 |
| LOC499240          | ENSRNOG00000013713 | 0.09136  | 0.169494 | 0.056458 | 0        | 0.03013  | 0        |
| Pcdh12             | ENSRNOG00000019265 | 0.028174 | 0.039202 | 0.019587 | 0.007524 | 0.006969 | 0.006373 |
| AABR0702087<br>9.1 | ENSRNOG00000003952 | 0.111067 | 0.110952 | 0.110874 | 0.063882 | 0.092982 | 0.069568 |
| Cct4               | ENSRNOG00000009642 | 202.5696 | 179.8992 | 226.0774 | 183.7983 | 171.8084 | 204.8644 |
| Metap1d            | ENSRNOG00000061587 | 1.740766 | 2.24331  | 1.646108 | 1.222989 | 1.965029 | 1.405824 |
| Lman1              | ENSRNOG00000024470 | 89.71651 | 87.45343 | 91.26375 | 78.37725 | 70.71053 | 84.60061 |
| Exoc1              | ENSRNOG00000002144 | 16.05163 | 20.50258 | 16.90865 | 14.88959 | 19.91961 | 16.33419 |
| Apbb1              | ENSRNOG00000018020 | 33.54485 | 43.10574 | 35.57266 | 31.88936 | 38.81428 | 31.57427 |
| Cep76              | ENSRNOG00000021918 | 6.230278 | 3.894268 | 6.054658 | 5.855946 | 3.17045  | 5.707511 |
| Tmem11             | ENSRNOG00000005377 | 24.7207  | 19.36355 | 24.76798 | 20.91941 | 17.92442 | 21.65621 |
| Sec61b             | ENSRNOG00000006345 | 135.2304 | 149.3019 | 196.7621 | 117.4724 | 106.0974 | 169.4385 |
| Aatf               | ENSRNOG00000002778 | 16.37134 | 15.92604 | 16.84877 | 15.17822 | 13.33186 | 13.69147 |
| Snx24              | ENSRNOG00000017488 | 11.14982 | 13.09541 | 12.92723 | 9.363055 | 12.08371 | 12.1363  |
| Fbln2              | ENSRNOG00000007338 | 233.3119 | 222.5331 | 262.1111 | 218.1843 | 190.6846 | 245.5326 |
| Nudt14             | ENSRNOG00000014362 | 42.20325 | 36.84281 | 42.05264 | 37.0683  | 26.42119 | 36.83401 |
| Fam92a             | ENSRNOG00000016338 | 29.53304 | 28.47134 | 33.73104 | 28.54202 | 25.84541 | 31.523   |
| Irf9               | ENSRNOG00000019478 | 84.61482 | 34.52576 | 54.67107 | 78.26035 | 27.17713 | 51.89389 |
| Rpl11              | ENSRNOG00000026260 | 164.0541 | 167.7863 | 174.6572 | 150.6932 | 137.1722 | 157.0414 |
| Hist1h1d           | ENSRNOG00000048264 | 518.6653 | 120.1483 | 260.9177 | 493.1054 | 59.34011 | 224.0226 |
| Wdr89              | ENSRNOG00000021628 | 2.669286 | 2.392964 | 2.740017 | 2.315456 | 2.038321 | 2.026021 |
| Atp5mc1            | ENSRNOG00000007235 | 278.4393 | 210.9723 | 291.9777 | 254.5245 | 156.2842 | 260.6361 |
| Ube2f              | ENSRNOG00000019953 | 38.15478 | 41.94691 | 50.08896 | 33.99925 | 31.29173 | 42.67849 |
| Pfkp               | ENSRNOG00000017163 | 44.07435 | 41.2398  | 57.53131 | 40.62602 | 36.98549 | 49.84117 |
| Tuba4a             | ENSRNOG00000003597 | 28.18779 | 25.06479 | 30.86435 | 22.1874  | 15.41955 | 26.88693 |
| Mreg               | ENSRNOG00000015774 | 0.166147 | 0.106698 | 0.11847  | 0.109215 | 0.075869 | 0.092505 |
| Aasdhppt           | ENSRNOG00000005795 | 40.3837  | 38.1095  | 46.45195 | 36.89435 | 31.54166 | 43.40732 |
| Meal               | ENSRNOG00000017144 | 98.33349 | 88.25067 | 89.17628 | 92.76997 | 74.20241 | 79.78074 |
| Rdh5               | ENSRNOG00000053850 | 11.23223 | 2.729176 | 4.580599 | 10.26167 | 2.36413  | 3.735484 |
| Calm2              | ENSRNOG00000030871 | 336.9822 | 202.2102 | 393.4885 | 301.3857 | 125.0228 | 352.2883 |
| LOC10369212<br>8   | ENSRNOG00000048146 | 0.046016 | 0.08537  | 0.127965 | 0        | 0.045528 | 0.041633 |
| Cdc123             | ENSRNOG00000017770 | 55.18717 | 45.98749 | 59.34445 | 50.83554 | 37.15061 | 54.95446 |
| Txn1               | ENSRNOG00000012081 | 860.4119 | 537.3913 | 1095.577 | 807.147  | 422.6914 | 953.3819 |
| AABR0705436<br>8.1 | ENSRNOG00000029996 | 978.0441 | 1147.81  | 1078.409 | 916.2626 | 982.7586 | 943.5929 |
| Ube2i              | ENSRNOG00000017907 | 123.0384 | 105.0039 | 126.2375 | 116.7956 | 102.5731 | 121.93   |
| Ndc80              | ENSRNOG00000013727 | 17.48714 | 6.850317 | 21.38971 | 16.163   | 3.956805 | 19.83619 |
| Gosr1              | ENSRNOG00000003971 | 17.27419 | 11.62391 | 12.15414 | 16.0643  | 11.17043 | 11.10649 |
| Rrp8               | ENSRNOG00000018766 | 6.597783 | 5.464429 | 5.910299 | 5.448554 | 4.484403 | 5.480215 |
| Trappc2b           | ENSRNOG00000049062 | 22.01034 | 23.22061 | 25.74232 | 20.47233 | 19.45482 | 23.38814 |
| Knstrn             | ENSRNOG00000009334 | 37.37946 | 15.51539 | 66.80425 | 31.43473 | 8.778    | 64.28203 |
| Actr1b             | ENSRNOG00000016789 | 26.03551 | 29.89532 | 33.83463 | 25.13096 | 27.46547 | 31.81802 |
| LOC10369282<br>9   | ENSRNOG00000061320 | 311.6513 | 357.3394 | 397.9116 | 285.5736 | 298.7119 | 327.8598 |
| Zfp473             | ENSRNOG00000026572 | 0.981983 | 0.498824 | 0.715203 | 0.811671 | 0.381684 | 0.433644 |
| Klhl13             | ENSRNOG00000014029 | 17.61071 | 20.89419 | 17.55583 | 14.79288 | 16.22577 | 15.61408 |
| Dnase112           | ENSRNOG00000042352 | 1.615017 | 1.414876 | 1.497055 | 0.91048  | 1.109636 | 1.095881 |
| Ppp1r14c           | ENSRNOG00000016368 | 21.89237 | 17.45318 | 22.60539 | 19.4319  | 14.05554 | 21.31548 |



|                |                    |          |          |          |          |          |          |
|----------------|--------------------|----------|----------|----------|----------|----------|----------|
| LOC103693430   | ENSRNOG00000020296 | 246.2969 | 175.5321 | 249.1518 | 214.5948 | 119.2178 | 224.5628 |
| Zfyve21        | ENSRNOG00000012185 | 36.61494 | 51.60343 | 37.37651 | 33.28472 | 45.97611 | 35.00839 |
| Cdc16          | ENSRNOG00000017536 | 16.74902 | 17.02549 | 19.70598 | 16.09465 | 15.53141 | 18.87063 |
| MGC94199       | ENSRNOG00000049287 | 7.258211 | 7.863887 | 9.347525 | 6.471203 | 6.357733 | 7.267274 |
| Peg12          | ENSRNOG00000024429 | 4.571075 | 4.601319 | 5.132759 | 3.881521 | 4.280024 | 4.774911 |
| Timp1          | ENSRNOG00000010208 | 558.5182 | 153.3972 | 332.7786 | 513.0165 | 105.578  | 314.703  |
| Pde1a          | ENSRNOG00000054212 | 9.590726 | 6.560002 | 11.76381 | 7.781736 | 5.865886 | 10.51775 |
| Dnajc11        | ENSRNOG00000008802 | 22.98063 | 17.3172  | 19.51152 | 21.75181 | 15.31399 | 18.69436 |
| Ubash3b        | ENSRNOG00000008187 | 0.674242 | 0.37526  | 1.085218 | 0.536883 | 0.278963 | 0.854022 |
| Aldh1a1        | ENSRNOG00000017619 | 0.034058 | 0.015796 | 0.063141 | 0.01819  | 0        | 0.030814 |
| Dctn3          | ENSRNOG00000014208 | 45.79739 | 38.54719 | 44.564   | 40.02515 | 32.8371  | 32.83517 |
| Sirt3          | ENSRNOG00000013828 | 11.64757 | 11.93771 | 11.22466 | 11.10757 | 10.53004 | 9.825689 |
| Pole4          | ENSRNOG00000006102 | 25.48957 | 20.52656 | 22.62491 | 21.04839 | 16.18471 | 20.93415 |
| AABR07065438.1 | ENSRNOG00000031889 | 385.7651 | 412.7015 | 404.6445 | 354.9996 | 338.3815 | 360.2086 |
| Emc9           | ENSRNOG00000019162 | 1.675136 | 1.291529 | 1.421703 | 1.475623 | 1.119254 | 1.348264 |
| Aspa           | ENSRNOG00000019659 | 3.656409 | 2.493454 | 2.367896 | 2.710794 | 1.998765 | 1.933507 |
| Srsf3          | ENSRNOG00000000520 | 57.9066  | 37.35928 | 65.83631 | 50.05671 | 23.70195 | 60.02633 |
| Polr2f         | ENSRNOG00000011214 | 55.03615 | 41.66377 | 55.1242  | 50.98392 | 31.87724 | 44.1586  |
| AABR07036855.1 | ENSRNOG00000056398 | 141.4486 | 135.4224 | 120.5753 | 119.1771 | 118.9752 | 112.2669 |
| Arpp19         | ENSRNOG00000023086 | 158.1716 | 105.5202 | 126.4945 | 145.7651 | 98.9587  | 120.8573 |
| Mtmr4          | ENSRNOG00000007496 | 21.83275 | 20.46193 | 19.49239 | 21.22627 | 19.10809 | 18.76658 |
| Mlf1           | ENSRNOG00000012827 | 1.148085 | 0.532487 | 1.252033 | 0.649247 | 0.133635 | 1.069273 |
| Cpsf3          | ENSRNOG00000052418 | 38.474   | 29.97986 | 37.16021 | 30.10424 | 25.15527 | 33.6224  |
| Ttc30b         | ENSRNOG00000059460 | 8.714677 | 7.880359 | 7.983272 | 7.62197  | 7.479309 | 7.02465  |
| LOC108348079   | ENSRNOG00000059412 | 8.060462 | 5.200022 | 9.68556  | 7.121838 | 4.660235 | 8.283004 |
| Utp15          | ENSRNOG00000016591 | 12.27348 | 11.9549  | 11.72137 | 11.72137 | 10.47511 | 10.6519  |
| Rtcb           | ENSRNOG00000004813 | 65.93118 | 64.42605 | 73.69483 | 61.29673 | 52.35939 | 65.59048 |
| Cenpw          | ENSRNOG00000042944 | 14.1425  | 5.177863 | 23.17536 | 11.79973 | 3.457489 | 19.09749 |
| Rpl36          | ENSRNOG00000033473 | 343.9644 | 311.0686 | 396.0063 | 317.8453 | 280.4988 | 338.1207 |
| Illr1          | ENSRNOG00000014504 | 20.03381 | 13.87595 | 17.83933 | 19.42005 | 12.22369 | 16.63792 |
| Kri1           | ENSRNOG00000057447 | 17.85742 | 13.11164 | 16.30305 | 16.78894 | 11.01352 | 13.42297 |
| Avpi1          | ENSRNOG00000014828 | 77.34986 | 81.96833 | 74.9753  | 70.41285 | 63.84832 | 62.83625 |
| Trim15         | ENSRNOG00000031689 | 2.522346 | 1.929691 | 3.663844 | 2.138779 | 1.337834 | 2.705552 |
| Steap1         | ENSRNOG00000000017 | 6.864453 | 3.61915  | 12.99806 | 6.361046 | 2.583128 | 11.6249  |
| Tspan7         | ENSRNOG00000003229 | 12.56783 | 8.937822 | 9.851288 | 11.37562 | 6.173589 | 8.31853  |
| Trim11         | ENSRNOG00000002915 | 13.69097 | 15.41377 | 13.76978 | 11.46466 | 11.33869 | 11.99195 |
| Mrpl23         | ENSRNOG00000020354 | 86.50211 | 73.85444 | 86.88739 | 73.23616 | 54.28117 | 79.45748 |
| Cct2           | ENSRNOG00000021317 | 126.9357 | 113.3928 | 142.2489 | 114.8907 | 108.5238 | 134.9683 |
| Ctdspl2        | ENSRNOG00000022141 | 20.56263 | 13.7037  | 17.59636 | 19.14591 | 12.75281 | 17.05684 |
| Phyhip         | ENSRNOG00000049071 | 0.071636 | 0.0443   | 0.132807 | 0.025507 | 0.023625 | 0.075614 |
| Pcid2          | ENSRNOG00000025222 | 11.52349 | 10.87661 | 9.219341 | 8.709395 | 7.80475  | 8.09626  |
| Uba3           | ENSRNOG00000006221 | 52.36068 | 36.80976 | 43.37552 | 46.6673  | 32.29443 | 41.31599 |
| Ube2n          | ENSRNOG00000058053 | 49.39215 | 31.2471  | 50.04462 | 42.45572 | 23.70943 | 47.29166 |
| Dtymk          | ENSRNOG00000018904 | 84.00003 | 59.20255 | 83.46564 | 73.99429 | 39.87285 | 74.68053 |
| Polr2c         | ENSRNOG00000015720 | 53.46637 | 37.1969  | 50.87798 | 46.97208 | 26.51333 | 46.59144 |
| Ptp4a2         | ENSRNOG00000050044 | 109.8135 | 99.14137 | 119.837  | 102.9934 | 80.67657 | 106.6175 |
| Adprm          | ENSRNOG00000049104 | 1.459857 | 1.828947 | 1.886971 | 1.292237 | 1.473134 | 1.710193 |
| LOC100909441   | ENSRNOG00000003397 | 20.53513 | 23.43836 | 22.53415 | 18.98636 | 19.25812 | 19.57295 |
| Rexo4          | ENSRNOG00000015544 | 436.6517 | 234.1455 | 642.0731 | 386.4405 | 122.7046 | 583.9607 |
| REXO4          | ENSRNOG00000027867 | 33.80862 | 28.57351 | 35.50295 | 29.82994 | 27.1394  | 32.35252 |
| Faap20         | ENSRNOG00000036876 | 9.594577 | 9.943842 | 7.411483 | 8.761994 | 7.969216 | 6.296132 |
| Ahsa1          | ENSRNOG00000048981 | 63.65269 | 47.97702 | 57.92746 | 61.47556 | 44.9493  | 52.6803  |

|                    |                    |          |          |          |          |          |          |
|--------------------|--------------------|----------|----------|----------|----------|----------|----------|
| Ints10             | ENSRNOG00000055331 | 22.58309 | 17.69023 | 27.19668 | 21.18457 | 13.84425 | 24.31152 |
| Dap3               | ENSRNOG00000020373 | 39.63139 | 30.18573 | 40.96386 | 34.72319 | 27.97362 | 38.40958 |
| Sgo1               | ENSRNOG00000022499 | 5.739026 | 2.465489 | 5.67293  | 5.171862 | 1.767083 | 5.422092 |
| Zdhhc2             | ENSRNOG00000022686 | 9.695687 | 11.06158 | 16.35004 | 8.276105 | 7.344472 | 13.90222 |
| Fcf1               | ENSRNOG00000004723 | 78.06554 | 45.64051 | 55.66043 | 70.07559 | 40.78027 | 52.47161 |
| LOC10369486<br>4   | ENSRNOG00000047940 | 2.879244 | 3.355069 | 2.205736 | 2.516348 | 2.660341 | 1.894527 |
| 2-Mar              | ENSRNOG00000007769 | 136.3947 | 141.6065 | 121.3525 | 125.5034 | 128.0441 | 116.4929 |
| Mrpl16             | ENSRNOG00000021005 | 22.51642 | 20.43171 | 22.41673 | 19.79272 | 19.3998  | 19.63239 |
| AABR0702482<br>5.1 | ENSRNOG00000046048 | 4.680039 | 3.937408 | 4.338204 | 4.127164 | 3.553536 | 3.397232 |
| Tab2               | ENSRNOG00000016054 | 26.0726  | 25.67771 | 26.5881  | 24.34253 | 22.31148 | 25.0596  |
| Cdh16              | ENSRNOG00000012222 | 0.424793 | 0.107466 | 0.536954 | 0.330003 | 0.063679 | 0.489145 |
| AC129049.1         | ENSRNOG00000031381 | 64.765   | 73.08192 | 65.5208  | 59.80084 | 62.44566 | 60.21967 |
| Lypla1             | ENSRNOG00000008320 | 79.99323 | 74.61655 | 55.23226 | 67.3764  | 66.36629 | 50.41752 |
| Polr3h             | ENSRNOG00000004471 | 51.82403 | 38.42915 | 55.05759 | 42.32997 | 30.82579 | 51.66039 |
| Rad23b             | ENSRNOG00000016137 | 136.8591 | 106.0329 | 143.4019 | 130.8814 | 89.40922 | 128.3412 |
| Gucd1              | ENSRNOG00000049952 | 18.31556 | 20.8944  | 24.59495 | 16.62242 | 16.14955 | 20.41986 |
| Cog4               | ENSRNOG00000017745 | 59.10639 | 45.68339 | 46.27899 | 52.72178 | 37.04343 | 43.16065 |
| Trappc4            | ENSRNOG00000011904 | 18.29034 | 15.32355 | 17.85213 | 17.26138 | 14.12654 | 15.54665 |
| Rhoa               | ENSRNOG00000050519 | 272.3735 | 261.4957 | 340.4183 | 260.7342 | 230.9248 | 320.6138 |
| L3mbtl2            | ENSRNOG00000024743 | 12.1527  | 9.579504 | 10.98468 | 11.66578 | 8.988395 | 9.871128 |
| Adh4               | ENSRNOG00000046357 | 12.80454 | 12.19288 | 14.72531 | 11.86224 | 9.576406 | 12.29341 |
| Psm5               | ENSRNOG00000018809 | 56.75639 | 34.67352 | 60.67942 | 52.66919 | 27.46425 | 57.69    |
| Fam107b            | ENSRNOG00000014886 | 23.36232 | 19.98876 | 26.95376 | 20.29031 | 16.53893 | 25.72483 |
| Jam3               | ENSRNOG00000009149 | 51.24331 | 45.14501 | 46.03861 | 45.95163 | 42.22648 | 38.19854 |
| Mrps23             | ENSRNOG00000010363 | 26.4353  | 21.29154 | 24.36994 | 23.37112 | 19.20692 | 23.23455 |
| Mus81              | ENSRNOG00000020617 | 36.83549 | 26.68333 | 29.12417 | 29.65177 | 21.88844 | 26.43947 |
| Mfap5              | ENSRNOG00000015505 | 12.83849 | 19.43232 | 22.16996 | 11.02262 | 17.41435 | 21.45127 |
| Mrpl57             | ENSRNOG00000010855 | 12.44811 | 9.963753 | 11.22247 | 11.32777 | 7.745339 | 10.21228 |
| Upk3b              | ENSRNOG00000023686 | 4.389682 | 6.766982 | 4.742352 | 3.643211 | 4.93675  | 3.685811 |
| Bin3               | ENSRNOG00000018023 | 13.87776 | 10.88225 | 12.51644 | 11.37388 | 9.627821 | 11.3681  |
| Irf3               | ENSRNOG00000043388 | 37.54915 | 41.05417 | 37.19284 | 33.85938 | 35.11813 | 34.88985 |
| Rfxank             | ENSRNOG00000033318 | 5.521933 | 6.940572 | 6.679781 | 4.954648 | 5.599908 | 5.070868 |
| Fam109a            | ENSRNOG00000028206 | 7.350046 | 9.288244 | 7.405643 | 6.599504 | 7.166642 | 5.541584 |
| Ube2m              | ENSRNOG00000027514 | 73.18545 | 59.63663 | 72.36139 | 67.24345 | 50.77691 | 69.06955 |
| Fsip1              | ENSRNOG00000005888 | 4.699292 | 2.032851 | 6.387478 | 3.837148 | 1.184707 | 4.599141 |
| Hars2              | ENSRNOG00000016087 | 11.25258 | 7.679822 | 11.90615 | 10.54383 | 6.321181 | 9.96068  |
| Avpr1a             | ENSRNOG00000004400 | 10.01969 | 15.54559 | 18.8688  | 8.718442 | 13.08092 | 15.30542 |
| B3gnt9             | ENSRNOG00000053895 | 25.18252 | 31.73825 | 21.30475 | 22.93389 | 26.66983 | 18.69761 |
| Katnb1             | ENSRNOG00000014626 | 15.57212 | 11.44605 | 16.64354 | 14.36404 | 9.580472 | 15.94255 |
| Rce1               | ENSRNOG00000019468 | 17.60614 | 16.01138 | 15.16324 | 15.45929 | 11.61285 | 13.11802 |
| Btla               | ENSRNOG00000030246 | 0.034962 | 0.097293 | 0.032408 | 0.018673 | 0.051886 | 0        |
| LOC10036433<br>5   | ENSRNOG00000061058 | 109.656  | 91.56196 | 109.9561 | 100.7998 | 80.32025 | 106.0268 |
| Laptm4a            | ENSRNOG00000006865 | 373.0644 | 501.8666 | 411.0591 | 355.8393 | 453.3089 | 375.4377 |
| Gemin2             | ENSRNOG00000004360 | 12.26801 | 10.73809 | 12.06264 | 11.08613 | 8.662332 | 11.21977 |
| Gucyl1a3           | ENSRNOG00000012302 | 15.63525 | 37.83031 | 10.87372 | 14.29656 | 35.81426 | 10.13171 |
| Pde12              | ENSRNOG00000059442 | 13.30107 | 10.44092 | 11.72142 | 11.84447 | 9.62174  | 11.12625 |
| Tcta               | ENSRNOG00000048237 | 22.91097 | 31.64203 | 23.72518 | 19.90054 | 26.22267 | 21.49105 |
| Rps4x              | ENSRNOG00000003201 | 900.1246 | 1024.404 | 1023.053 | 819.8449 | 837.144  | 923.9594 |
| Vps28              | ENSRNOG00000014633 | 55.99704 | 56.43535 | 50.19692 | 52.58925 | 48.90039 | 46.45549 |
| Tmem9b             | ENSRNOG00000013591 | 15.17502 | 14.12794 | 14.06662 | 14.10559 | 11.61042 | 12.7255  |
| Osbp19             | ENSRNOG00000033593 | 31.76236 | 30.88198 | 33.44208 | 31.10687 | 29.31214 | 32.58836 |
| Dbf4               | ENSRNOG00000050482 | 2.699612 | 1.103242 | 3.079913 | 2.359356 | 0.691087 | 2.937777 |
| Pex2               | ENSRNOG00000008748 | 23.78344 | 19.12159 | 22.83977 | 22.56289 | 15.61104 | 19.6759  |
| Atg4b              | ENSRNOG00000018403 | 30.12694 | 26.72681 | 34.40041 | 28.62966 | 22.82072 | 30.10176 |

|             |                     |          |          |          |          |          |          |
|-------------|---------------------|----------|----------|----------|----------|----------|----------|
| Rad18       | ENSRNOG00000005907  | 11.23278 | 4.969794 | 9.4106   | 10.16139 | 3.343103 | 8.813248 |
| Dhrs7       | ENSRNOG00000005589  | 28.18367 | 30.89187 | 31.35553 | 26.71866 | 29.63991 | 28.49885 |
| Selenof     | ENSRNOG000000055257 | 365.7565 | 355.7729 | 393.7142 | 321.2438 | 282.8065 | 365.7192 |
| Pacrgl      | ENSRNOG00000004140  | 4.959321 | 2.925543 | 3.664959 | 3.759461 | 2.238533 | 3.184259 |
| Eif2b5      | ENSRNOG000000038160 | 33.32879 | 31.56482 | 37.37733 | 31.87858 | 28.51315 | 33.24138 |
| Yeats4      | ENSRNOG00000005689  | 30.89922 | 29.5664  | 27.20754 | 28.59684 | 24.47403 | 24.68828 |
| Lgals3      | ENSRNOG00000010645  | 89.89667 | 163.731  | 118.5217 | 78.33454 | 133.8585 | 85.14977 |
| Vill        | ENSRNOG00000011446  | 0.121387 | 0.2252   | 0.187535 | 0.014407 | 0.106755 | 0.146432 |
| Wfdc21      | ENSRNOG00000029668  | 10.37542 | 1.374905 | 28.3032  | 9.393963 | 0.879883 | 26.90965 |
| LOC10255265 | ENSRNOG00000059949  | 933.7024 | 258.9007 | 630.263  | 861.5551 | 107.1615 | 559.1612 |
|             | ENSRNOG00000049238  | 0.30096  | 0.459814 | 0.37744  | 0.283657 | 0.43789  | 0.33636  |
| Tymp        | ENSRNOG00000032394  | 22.00881 | 14.7561  | 16.3299  | 20.25072 | 12.42041 | 15.51947 |
| B4galt7     | ENSRNOG00000021886  | 28.06441 | 28.98559 | 31.27368 | 25.02768 | 24.6171  | 29.72088 |
| Arpc1b      | ENSRNOG00000000991  | 844.2614 | 944.9609 | 853.5174 | 778.3432 | 776.9035 | 755.6376 |
| Mdh1        | ENSRNOG00000008103  | 183.599  | 151.9774 | 203.5903 | 160.3751 | 111.8762 | 187.818  |
| LOC10036583 | ENSRNOG00000048109  | 847.6437 | 1030.462 | 1044.276 | 771.9365 | 834.8974 | 928.4453 |
| Stat5b      | ENSRNOG00000019075  | 30.48586 | 27.05453 | 30.49801 | 28.76932 | 25.16071 | 26.66713 |
| Trip6       | ENSRNOG00000048580  | 55.49245 | 64.20775 | 54.87853 | 51.50072 | 55.16424 | 50.3348  |
| Ebna1bp2    | ENSRNOG00000045760  | 51.43481 | 39.25857 | 48.80421 | 47.30891 | 29.27972 | 43.39453 |
| Sdha        | ENSRNOG00000013331  | 89.61004 | 93.37194 | 98.41212 | 83.01887 | 80.3543  | 92.71146 |
| Eif4a2      | ENSRNOG00000001815  | 182.2405 | 153.0818 | 142.6032 | 160.0557 | 128.1768 | 134.0727 |
| B9d2        | ENSRNOG00000028753  | 12.1781  | 8.386805 | 14.82342 | 9.493462 | 7.302331 | 13.32739 |
| Sbds        | ENSRNOG00000000888  | 49.93983 | 48.19859 | 43.92014 | 46.95694 | 39.54914 | 37.43291 |
| Prkx        | ENSRNOG00000060168  | 6.100828 | 7.284512 | 7.750679 | 5.17849  | 6.961248 | 6.858531 |
| LOC10036084 | ENSRNOG00000011827  | 12.20834 | 9.519849 | 14.74318 | 11.22222 | 7.795853 | 12.05753 |
| 6           |                     |          |          |          |          |          |          |
| Homer2      | ENSRNOG00000061450  | 7.055835 | 4.983365 | 6.224844 | 6.465943 | 3.930291 | 5.801822 |
| Sgca        | ENSRNOG00000003998  | 5.41169  | 6.66581  | 2.857712 | 5.022516 | 5.551745 | 1.785905 |
| Tcn2        | ENSRNOG00000004280  | 42.43311 | 74.33897 | 29.49115 | 41.62978 | 73.53825 | 27.78252 |
| Ttll6       | ENSRNOG00000004939  | 0.008959 | 0.016622 | 0.024915 | 0        | 0        | 0        |
| Dctpp1      | ENSRNOG00000017850  | 44.36039 | 15.49841 | 41.39008 | 31.21666 | 7.545317 | 36.39515 |
| Kctd14      | ENSRNOG00000012494  | 8.668239 | 6.403148 | 9.763478 | 6.589496 | 5.043691 | 9.009035 |
| Nmral1      | ENSRNOG00000003794  | 23.32552 | 13.99533 | 20.02019 | 20.73015 | 9.005283 | 17.89339 |
| Nifk        | ENSRNOG00000025701  | 23.02018 | 19.57572 | 23.04444 | 21.1499  | 15.58846 | 21.17417 |
| Rplp0       | ENSRNOG00000001148  | 2452.684 | 2484.212 | 2372.48  | 2251.134 | 1988.39  | 2099.601 |
| Casp9       | ENSRNOG00000012944  | 10.12942 | 9.126397 | 9.456951 | 9.577509 | 8.667276 | 8.386197 |
| Katna1      | ENSRNOG00000014996  | 11.52516 | 9.727847 | 11.75984 | 8.890151 | 8.234413 | 10.71386 |
| Aunip       | ENSRNOG00000022030  | 11.43919 | 3.183328 | 6.547762 | 10.78332 | 2.178672 | 6.183842 |
| Mad2l2      | ENSRNOG00000009134  | 14.67036 | 10.62285 | 12.28057 | 13.13871 | 7.899133 | 11.19619 |
| Sirt6       | ENSRNOG00000006393  | 20.08181 | 17.68725 | 16.44222 | 15.69694 | 14.98512 | 14.80426 |
| Commd3      | ENSRNOG00000016383  | 102.9639 | 102.4461 | 103.5863 | 97.32665 | 91.15846 | 98.62693 |
| Jpt1        | ENSRNOG00000003661  | 87.71416 | 68.15182 | 137.7423 | 80.76874 | 53.65901 | 117.6512 |
| Caskin1     | ENSRNOG00000003195  | 0.373403 | 0.41095  | 0.363729 | 0.310975 | 0.388225 | 0.297752 |
| Pgls        | ENSRNOG00000018326  | 36.72736 | 35.40264 | 30.00158 | 35.92259 | 34.75833 | 28.46754 |
| Def6        | ENSRNOG00000000502  | 8.985732 | 11.75087 | 12.34662 | 7.914983 | 8.695461 | 10.22734 |
| Tmem69      | ENSRNOG00000029152  | 14.86119 | 13.62403 | 14.06234 | 13.93392 | 10.87941 | 11.88944 |
| Ptges3      | ENSRNOG00000002642  | 153.7727 | 119.0424 | 158.9267 | 145.5676 | 109.3021 | 155.6501 |
| Nab2        | ENSRNOG00000008415  | 25.16019 | 27.44314 | 32.22753 | 22.1114  | 25.52353 | 31.10927 |
| Fam104a     | ENSRNOG00000002851  | 16.0199  | 16.27427 | 14.99854 | 14.06959 | 15.59849 | 13.10257 |
| Bfsp2       | ENSRNOG00000010899  | 0.145445 | 0.044972 | 0.089881 | 0.129468 | 0        | 0.043864 |
| Cox6a1      | ENSRNOG00000001170  | 349.0224 | 290.5114 | 368.0362 | 326.4979 | 223.445  | 309.7112 |
| Endov       | ENSRNOG00000003699  | 5.657331 | 4.064464 | 4.98705  | 4.295283 | 3.100457 | 4.516261 |
| Qprt        | ENSRNOG00000016980  | 0.249703 | 0.26058  | 0.347197 | 0.100023 | 0.18529  | 0.282397 |
| Pold1       | ENSRNOG00000019681  | 22.05843 | 5.470429 | 11.46222 | 20.80446 | 3.773319 | 10.88426 |
| Mrpl18      | ENSRNOG00000014582  | 39.53587 | 27.75416 | 39.18957 | 38.36887 | 25.94646 | 38.53791 |
| Snx4        | ENSRNOG00000001786  | 35.00764 | 35.46342 | 38.77128 | 30.73979 | 33.71613 | 36.48204 |

|                    |                    |          |          |          |          |          |          |
|--------------------|--------------------|----------|----------|----------|----------|----------|----------|
| Col9a3             | ENSRNOG00000009531 | 0.092032 | 0.204888 | 0.153558 | 0.019661 | 0        | 0.016653 |
| Gli1               | ENSRNOG00000025120 | 0.067344 | 0.044621 | 0.080261 | 0.041106 | 0        | 0.008704 |
| Ibtk               | ENSRNOG00000027728 | 13.7393  | 15.51192 | 15.41518 | 12.51862 | 14.4001  | 15.00381 |
| Dohh               | ENSRNOG00000004259 | 73.58241 | 76.69256 | 80.55487 | 63.91966 | 55.17271 | 70.19297 |
| Rpl13              | ENSRNOG00000015335 | 724.9465 | 835.2848 | 860.8594 | 683.3675 | 735.0096 | 736.1737 |
| Anxa5              | ENSRNOG00000014453 | 403.9149 | 574.2248 | 373.8035 | 373.0688 | 491.457  | 323.9149 |
| Fam136a            | ENSRNOG00000016273 | 30.14213 | 21.91292 | 32.2074  | 26.35667 | 18.60998 | 30.94927 |
| Anapc5             | ENSRNOG00000001316 | 240.9596 | 203.302  | 314.4461 | 221.9928 | 150.8623 | 281.3573 |
| Odf2               | ENSRNOG00000014584 | 23.29323 | 17.86275 | 26.69605 | 21.93204 | 14.96643 | 25.37369 |
| Tctn3              | ENSRNOG00000047112 | 4.059936 | 3.200151 | 3.431904 | 3.437919 | 2.226955 | 3.083202 |
| Sphk2              | ENSRNOG00000021032 | 14.58143 | 14.92962 | 12.12822 | 14.4305  | 14.7074  | 11.73771 |
| Atf3               | ENSRNOG00000003745 | 1.122989 | 0.251444 | 0.239302 | 0.937578 | 0.153251 | 0.163497 |
| Suclg2             | ENSRNOG00000005686 | 60.78258 | 56.82195 | 61.23689 | 58.52777 | 53.13927 | 55.14569 |
| Bzw2               | ENSRNOG00000005096 | 41.55548 | 27.72063 | 39.99813 | 36.04793 | 25.09739 | 37.52305 |
| Anxa4              | ENSRNOG00000018159 | 124.3827 | 153.6942 | 117.7457 | 113.1953 | 135.9061 | 111.3229 |
| Psmc9              | ENSRNOG00000001339 | 49.71138 | 35.45336 | 49.99388 | 42.76706 | 25.25577 | 46.46847 |
| Dnase113           | ENSRNOG00000009291 | 0.10713  | 0.173906 | 0.049653 | 0        | 0.026498 | 0        |
| Kctd2              | ENSRNOG00000023764 | 15.79084 | 16.77675 | 12.91416 | 13.87636 | 14.51054 | 12.16857 |
| Snrpb              | ENSRNOG00000006961 | 107.2484 | 78.6478  | 118.1362 | 100.4388 | 61.33148 | 108.5707 |
| Ftsj3              | ENSRNOG00000009857 | 41.62914 | 27.40813 | 34.44052 | 39.33583 | 21.75908 | 31.44791 |
| Fh                 | ENSRNOG00000003653 | 46.87137 | 37.04763 | 59.23908 | 44.27918 | 29.51917 | 54.11596 |
| Cd151              | ENSRNOG00000046094 | 621.0473 | 586.674  | 687.079  | 531.4083 | 443.0018 | 635.2948 |
| Ssr2               | ENSRNOG00000019940 | 154.1791 | 123.1316 | 204.0688 | 142.122  | 88.19432 | 180.4604 |
| Tapbp1             | ENSRNOG00000027552 | 41.27221 | 31.56205 | 34.95416 | 38.21632 | 25.43024 | 32.33315 |
| Slc39a14           | ENSRNOG00000009832 | 109.3647 | 75.90692 | 155.8778 | 103.5075 | 70.64435 | 143.8358 |
| Pmm2               | ENSRNOG00000002615 | 76.77077 | 62.11293 | 69.55632 | 70.74096 | 48.04758 | 62.57476 |
| Mocos              | ENSRNOG00000015113 | 4.839393 | 5.0825   | 5.318062 | 4.651284 | 4.910537 | 5.255954 |
| Ilf2               | ENSRNOG00000014154 | 44.83831 | 26.82786 | 42.13333 | 39.02712 | 19.54165 | 39.74892 |
| LOC690468          | ENSRNOG00000048701 | 657.9034 | 677.9764 | 749.7292 | 596.175  | 488.8881 | 598.2637 |
| Srp9               | ENSRNOG00000003211 | 30.25421 | 28.27389 | 34.7541  | 29.23612 | 25.23332 | 31.82347 |
| Arl6ip6            | ENSRNOG00000005074 | 28.49085 | 14.99438 | 22.34367 | 24.92759 | 11.06706 | 21.05411 |
| Wrap53             | ENSRNOG00000010520 | 11.90886 | 9.740361 | 9.656746 | 9.203181 | 7.29488  | 8.769468 |
| AABR0703700<br>9.1 | ENSRNOG00000003054 | 2.594432 | 2.894446 | 3.379905 | 2.396806 | 2.393457 | 3.108578 |
| Nbn                | ENSRNOG00000008580 | 21.6689  | 25.70389 | 23.64609 | 19.55298 | 22.46509 | 22.5214  |
| Emc3               | ENSRNOG00000009934 | 66.48171 | 60.70988 | 60.06388 | 60.84877 | 49.82463 | 55.60997 |
| Camk2g             | ENSRNOG00000009783 | 7.00121  | 5.986028 | 6.826599 | 6.320892 | 5.696264 | 6.490284 |
| Ribc1              | ENSRNOG00000003081 | 2.139628 | 1.261901 | 1.065131 | 1.777609 | 1.00619  | 0.944007 |
| Taf6               | ENSRNOG00000001355 | 33.96108 | 25.99421 | 27.48934 | 32.40536 | 23.14591 | 26.37602 |
| Hist1h3a           | ENSRNOG00000046434 | 888.0236 | 280.9355 | 573.4184 | 825.6025 | 121.4852 | 486.5233 |
| Rps25              | ENSRNOG00000027503 | 881.3536 | 955.4817 | 1043.917 | 824.6422 | 780.1628 | 899.8588 |
| Peyox1             | ENSRNOG00000016704 | 42.32691 | 57.677   | 47.90575 | 40.6841  | 52.59674 | 43.6526  |
| Glpr1              | ENSRNOG00000026644 | 22.05503 | 16.33236 | 16.25221 | 19.67838 | 11.2222  | 13.95112 |
| Dnajc24            | ENSRNOG00000004842 | 10.18041 | 9.267747 | 13.25545 | 9.05362  | 8.620065 | 11.43835 |
| Cops5              | ENSRNOG00000006499 | 67.59843 | 46.73398 | 62.12976 | 58.39367 | 36.28779 | 58.74709 |
| Aco2               | ENSRNOG00000024128 | 44.98762 | 44.0971  | 54.14164 | 41.86839 | 35.18571 | 48.44888 |
| Ltbr               | ENSRNOG00000019264 | 94.26193 | 126.5327 | 109.5189 | 89.94093 | 113.5287 | 100.2634 |
| Ppan               | ENSRNOG00000020608 | 27.67869 | 25.18412 | 27.36322 | 26.05122 | 20.14601 | 22.91883 |
| Cdipt              | ENSRNOG00000024144 | 65.34317 | 53.26531 | 50.50028 | 62.34881 | 45.84501 | 46.6276  |
| Cmpk1              | ENSRNOG00000007775 | 48.06674 | 57.25776 | 60.89365 | 42.9126  | 46.96898 | 56.59164 |
| Grwd1              | ENSRNOG00000021058 | 18.14004 | 10.40426 | 14.51425 | 14.6721  | 8.475213 | 13.18707 |
| Tra2b              | ENSRNOG00000001783 | 88.40326 | 64.57062 | 93.13902 | 81.02676 | 51.68129 | 88.32118 |
| Swi5               | ENSRNOG00000022860 | 239.1634 | 198.4091 | 296.2365 | 226.0745 | 157.5511 | 263.1491 |
| Ankrd50            | ENSRNOG00000010534 | 15.66863 | 27.75082 | 16.72608 | 15.3054  | 26.6147  | 15.76968 |
| Smad2              | ENSRNOG00000018140 | 33.79682 | 33.2226  | 34.51867 | 30.3513  | 29.52078 | 33.31675 |
| Ddx56              | ENSRNOG00000004670 | 19.76271 | 15.57468 | 20.04517 | 17.4812  | 11.32778 | 18.38259 |

|             |                    |          |          |          |          |          |          |  |
|-------------|--------------------|----------|----------|----------|----------|----------|----------|--|
| AABR0700983 |                    |          |          |          |          |          |          |  |
| 4.1         | ENSRNOG00000061630 | 1.452794 | 0.829308 | 0.621545 | 0.119372 | 0.110567 | 0.101108 |  |
| Elov17      | ENSRNOG00000010450 | 0.50233  | 0.310644 | 0.271623 | 0.134144 | 0.041417 | 0.151493 |  |
| Sphk1       | ENSRNOG00000010626 | 4.590555 | 6.461093 | 6.106569 | 4.149945 | 5.082526 | 5.007299 |  |
| Ptges2      | ENSRNOG00000014050 | 18.21038 | 14.00966 | 12.35849 | 15.46507 | 12.62399 | 11.22987 |  |
| Ostf1       | ENSRNOG00000012156 | 116.0697 | 100.2798 | 118.3244 | 104.0307 | 78.82638 | 110.2509 |  |
| Prkcsh      | ENSRNOG00000013360 | 152.1929 | 171.5445 | 154.5586 | 141.0823 | 148.6024 | 144.7823 |  |
| Ssr3        | ENSRNOG00000011148 | 146.3902 | 134.7841 | 159.1155 | 128.1292 | 112.9059 | 152.1641 |  |
| Pecr        | ENSRNOG00000055295 | 20.31497 | 25.74828 | 19.02907 | 19.61466 | 24.62624 | 17.11035 |  |
| Uck11       | ENSRNOG00000050277 | 21.77442 | 22.65903 | 19.37059 | 18.46324 | 19.10026 | 18.22319 |  |
| RGD1359634  | ENSRNOG00000011170 | 0.980546 | 1.230585 | 1.176257 | 0.739337 | 0.57067  | 0.417479 |  |
| Brms11      | ENSRNOG00000008249 | 7.750035 | 5.139504 | 6.490776 | 6.571882 | 4.730705 | 5.217837 |  |
| Nme7        | ENSRNOG00000002898 | 13.71056 | 14.11727 | 12.95881 | 11.73924 | 9.48753  | 10.72297 |  |
| Rer1        | ENSRNOG00000014270 | 98.37577 | 92.47539 | 105.7231 | 82.80682 | 62.87481 | 94.03971 |  |
| Primpol     | ENSRNOG00000022320 | 7.716101 | 2.692929 | 4.231312 | 7.038466 | 1.492827 | 3.784302 |  |
| Snx6        | ENSRNOG00000005249 | 42.92718 | 37.13617 | 43.40917 | 40.27497 | 29.14037 | 37.95976 |  |
| Dync2li1    | ENSRNOG00000005151 | 8.857181 | 6.986672 | 7.923602 | 7.998218 | 6.512283 | 6.554659 |  |
| Arntl2      | ENSRNOG00000001830 | 13.8695  | 14.3124  | 18.2743  | 11.52282 | 13.55495 | 16.56108 |  |
| Slc25a5     | ENSRNOG00000039980 | 146.0245 | 143.1709 | 188.3809 | 130.5324 | 105.028  | 169.0799 |  |
| Frmd4b      | ENSRNOG00000007764 | 3.722618 | 5.069325 | 4.301576 | 3.059473 | 4.860356 | 3.760177 |  |
| Tmem132a    | ENSRNOG00000021338 | 71.97012 | 82.0759  | 75.82084 | 70.35851 | 77.06926 | 71.05387 |  |
| Slc7a7      | ENSRNOG00000010296 | 7.155234 | 11.86483 | 7.923913 | 6.064832 | 8.561973 | 5.671601 |  |
| Tmed4       | ENSRNOG00000005016 | 23.43177 | 26.81137 | 24.4075  | 20.83326 | 21.50289 | 22.19297 |  |
| Rars        | ENSRNOG00000007739 | 92.41781 | 56.42641 | 80.84465 | 82.93098 | 40.44862 | 75.14122 |  |
| Utp6        | ENSRNOG00000014209 | 51.13656 | 37.79193 | 40.41294 | 49.26146 | 33.18206 | 38.09536 |  |
| Kif23       | ENSRNOG00000014080 | 34.07072 | 14.49909 | 55.59949 | 30.85587 | 7.8206   | 52.7741  |  |
| Rgs3        | ENSRNOG00000024501 | 11.10277 | 17.15674 | 11.61879 | 10.27314 | 14.88817 | 10.31878 |  |
| Zfp78       | ENSRNOG00000015322 | 1.390709 | 2.127424 | 1.78669  | 0.964285 | 1.979435 | 1.523125 |  |
| 3-Mar       | ENSRNOG00000023013 | 43.76204 | 41.27842 | 52.06581 | 40.56531 | 39.91673 | 47.77906 |  |
| Srgn        | ENSRNOG00000000394 | 50.1133  | 48.12516 | 39.72195 | 47.32971 | 45.80018 | 34.08037 |  |
| Smim15      | ENSRNOG00000031995 | 25.55803 | 19.00248 | 21.5767  | 23.98207 | 16.24411 | 20.57077 |  |
| Bik         | ENSRNOG00000010359 | 0.353496 | 0.255038 | 0.436902 | 0.293686 | 0.116581 | 0.248751 |  |
| Mogs        | ENSRNOG00000008648 | 40.69612 | 35.82608 | 32.63194 | 36.21275 | 29.14023 | 30.42626 |  |
| Hmgxb3      | ENSRNOG00000018132 | 12.83967 | 16.43913 | 15.10973 | 11.86672 | 15.88742 | 13.52112 |  |
| Psmal       | ENSRNOG00000011745 | 181.1251 | 140.3621 | 178.4205 | 165.8342 | 104.4584 | 161.383  |  |
| Mrps12      | ENSRNOG00000019949 | 50.03071 | 41.17702 | 63.90071 | 46.18957 | 30.02017 | 51.69084 |  |
| Tyw1        | ENSRNOG00000024352 | 19.32962 | 16.73326 | 16.42569 | 18.3055  | 13.90745 | 14.80169 |  |
| LOC10834924 | ENSRNOG00000005753 | 1.500884 | 1.511388 | 1.648202 | 1.372114 | 1.25084  | 1.541416 |  |
| 4           |                    |          |          |          |          |          |          |  |
| Rasl12      | ENSRNOG00000032339 | 83.10057 | 46.62204 | 78.21482 | 80.02085 | 41.70308 | 69.68502 |  |
| Cwf1911     | ENSRNOG00000012763 | 15.08468 | 10.28341 | 13.93768 | 12.6057  | 6.738574 | 12.79477 |  |
| Prdx1       | ENSRNOG00000017194 | 668.2819 | 530.4564 | 809.8683 | 621.758  | 382.5802 | 699.5852 |  |
| Vps11       | ENSRNOG00000010733 | 27.95899 | 38.46749 | 24.78365 | 27.09585 | 35.80555 | 22.95968 |  |
| Psmb6       | ENSRNOG00000019551 | 174.9151 | 129.7051 | 172.0423 | 160.5481 | 90.25992 | 149.7246 |  |
| Adora2a     | ENSRNOG00000001302 | 0.498641 | 0.43451  | 0.29414  | 0.274388 | 0.194349 | 0.218735 |  |
| Slc30a6     | ENSRNOG00000005856 | 12.50991 | 12.84762 | 12.94666 | 11.72355 | 10.62819 | 10.40435 |  |
| Ndufs3      | ENSRNOG00000009155 | 55.51204 | 54.66882 | 57.90183 | 52.96356 | 47.38099 | 53.54472 |  |
| Dhrs4       | ENSRNOG00000018239 | 26.21045 | 25.45629 | 21.19872 | 22.61437 | 21.62377 | 19.99684 |  |
| Serpinb6a   | ENSRNOG00000017962 | 150.1132 | 182.4047 | 211.1321 | 136.3886 | 154.2396 | 169.1072 |  |
| LOC10091137 | ENSRNOG00000007663 | 1477.078 | 1652.727 | 1683.966 | 1371.421 | 1338.232 | 1483.981 |  |
| 2           |                    |          |          |          |          |          |          |  |
| Gadd45gip1  | ENSRNOG00000003011 | 47.89685 | 40.63607 | 40.92351 | 45.76801 | 34.75973 | 37.58818 |  |
| Vcp         | ENSRNOG00000034242 | 257.0247 | 257.9058 | 286.8105 | 239.273  | 214.3313 | 265.3649 |  |
| Tmem127     | ENSRNOG00000022727 | 25.18793 | 32.05628 | 21.87793 | 23.73764 | 31.23176 | 21.35358 |  |
| Sync        | ENSRNOG00000008118 | 21.56115 | 25.2508  | 22.45634 | 19.84989 | 21.9354  | 21.16179 |  |
| Ldhd        | ENSRNOG00000019036 | 7.731268 | 6.640363 | 5.892512 | 6.790196 | 4.306222 | 4.73229  |  |
| Cd81        | ENSRNOG00000020451 | 500.4135 | 553.4724 | 473.869  | 484.7802 | 503.83   | 437.7808 |  |

|                    |                    |          |          |          |          |          |          |
|--------------------|--------------------|----------|----------|----------|----------|----------|----------|
| Uap1               | ENSRNOG00000002926 | 52.87601 | 20.86138 | 35.58034 | 46.58286 | 18.93046 | 30.52826 |
| Tmigd1             | ENSRNOG00000003865 | 0.082927 | 0.046154 | 0.023061 | 0.017716 | 0.008205 | 0        |
| Elov15             | ENSRNOG00000006331 | 90.5397  | 121.0248 | 167.8532 | 83.5242  | 101.2556 | 156.4142 |
| H3f3b              | ENSRNOG00000006532 | 487.7078 | 226.3273 | 313.3008 | 473.82   | 180.8819 | 275.4118 |
| AABR0707124<br>4.1 | ENSRNOG00000060723 | 130.4159 | 123.1736 | 178.9801 | 119.7807 | 94.27684 | 163.0733 |
| Relt               | ENSRNOG00000025075 | 3.890471 | 1.219711 | 2.9529   | 3.70683  | 0.684    | 2.35476  |
| AABR0700577<br>9.2 | ENSRNOG00000020000 | 12.74558 | 11.66735 | 13.307   | 12.00226 | 9.258615 | 11.47078 |
| AABR0707198<br>6.1 | ENSRNOG00000031947 | 122.1225 | 107.6395 | 143.8886 | 102.3343 | 91.42985 | 103.7161 |
| Mpi                | ENSRNOG00000018898 | 22.68801 | 21.36725 | 23.37272 | 21.16573 | 18.35475 | 22.18509 |
| Atp6v0d1           | ENSRNOG00000017235 | 48.26424 | 69.447   | 44.91072 | 46.29363 | 66.08287 | 39.23859 |
| Pwp1               | ENSRNOG00000005350 | 17.89794 | 15.09453 | 19.0454  | 15.78221 | 13.11836 | 18.39066 |
| Zfp111             | ENSRNOG00000024376 | 12.04597 | 9.288244 | 10.3563  | 11.7725  | 8.809764 | 9.56089  |
| Obscn              | ENSRNOG00000058068 | 0.11188  | 0.33976  | 0.108647 | 0.062599 | 0.250377 | 0.075917 |
| Rps8               | ENSRNOG00000054626 | 701.6727 | 759.8244 | 744.3395 | 673.9589 | 676.1838 | 654.5529 |
| Ms4a6e             | ENSRNOG00000030689 | 0.049756 | 0.046154 | 0.122991 | 0        | 0        | 0.015005 |
| Eef1g              | ENSRNOG00000020075 | 1092.021 | 1093.766 | 1105.275 | 988.1779 | 840.4293 | 983.2977 |
| Psmid6             | ENSRNOG00000006751 | 86.7686  | 74.3452  | 93.44822 | 78.89195 | 71.13482 | 89.636   |
| Atp5f1b            | ENSRNOG00000002840 | 653.9227 | 608.2936 | 830.9787 | 599.9165 | 461.8158 | 751.3573 |
| Arhgef40           | ENSRNOG00000052354 | 24.83841 | 26.92877 | 23.3371  | 24.67644 | 26.60294 | 22.83886 |
| Rabggtb            | ENSRNOG00000009992 | 96.61967 | 87.70771 | 100.8759 | 89.3833  | 70.91115 | 93.23173 |
| Armc5              | ENSRNOG00000019935 | 14.98283 | 15.94771 | 11.18972 | 13.82859 | 13.59419 | 10.24479 |
| Ppp1r2             | ENSRNOG00000001733 | 99.27767 | 81.50082 | 85.5924  | 86.41678 | 62.63067 | 79.59474 |
| Ndufa12            | ENSRNOG00000007407 | 94.46661 | 59.97603 | 103.2429 | 88.48486 | 42.53886 | 92.84038 |
| Immt               | ENSRNOG00000009097 | 48.11645 | 44.39798 | 51.17146 | 46.20443 | 38.75373 | 44.87151 |
| LOC288913          | ENSRNOG00000049931 | 91.99541 | 96.6294  | 111.6973 | 83.80362 | 92.31363 | 98.67414 |
| Tmem38b            | ENSRNOG00000028063 | 5.562318 | 6.485309 | 5.753466 | 5.118394 | 5.544867 | 4.360626 |
| Rpl18              | ENSRNOG00000021035 | 1019.891 | 1046.859 | 1141.802 | 913.9368 | 808.8287 | 1037.347 |
| Gpn1               | ENSRNOG00000004941 | 20.86269 | 14.86142 | 19.33886 | 20.07427 | 12.24946 | 17.0196  |
| Slc25a4            | ENSRNOG00000010830 | 440.6058 | 546.7914 | 566.0512 | 408.2107 | 454.9654 | 513.6667 |
| Tchp               | ENSRNOG00000001191 | 9.441237 | 9.245706 | 9.076701 | 8.096727 | 7.085838 | 8.35885  |
| Prss16             | ENSRNOG00000057865 | 0.236616 | 0.270138 | 0.18559  | 0.038884 | 0.036016 | 0.115272 |
| Cth                | ENSRNOG00000010658 | 0.763781 | 0.363819 | 0.650589 | 0.396901 | 0.183813 | 0.504262 |
| Mcph1              | ENSRNOG00000028586 | 6.62632  | 3.970363 | 5.781638 | 6.100097 | 3.159104 | 5.518819 |
| Rhpn1              | ENSRNOG00000007597 | 1.514992 | 1.379052 | 1.679953 | 1.194802 | 1.064648 | 0.960756 |
| Gorab              | ENSRNOG00000003861 | 13.1274  | 11.52311 | 13.51481 | 12.47101 | 9.863117 | 12.69337 |
| Lamp2              | ENSRNOG00000000164 | 162.9422 | 215.4054 | 142.1748 | 148.0155 | 190.3464 | 133.6335 |
| Appl1              | ENSRNOG00000013574 | 22.70301 | 23.47398 | 22.93626 | 21.64207 | 22.57333 | 22.61914 |
| AABR0704830<br>8.1 | ENSRNOG00000027547 | 0.19109  | 0.53177  | 0.619963 | 0        | 0.472654 | 0.432218 |
| Larp7              | ENSRNOG00000048989 | 22.11971 | 15.49549 | 26.08551 | 21.59547 | 13.75565 | 24.74153 |
| Nabp2              | ENSRNOG00000023480 | 45.99964 | 50.62828 | 53.27578 | 42.89709 | 40.34663 | 43.8624  |
| Ddx47              | ENSRNOG00000007838 | 40.60014 | 39.14085 | 40.64766 | 36.95656 | 37.6833  | 35.8306  |
| Gtpbp8             | ENSRNOG00000002044 | 12.68341 | 8.889291 | 10.01522 | 10.87193 | 4.98853  | 8.386828 |
| Brix1              | ENSRNOG00000018021 | 16.86722 | 11.40785 | 13.12831 | 15.12832 | 10.22416 | 12.58186 |
| Rnf19b             | ENSRNOG00000000123 | 30.60373 | 20.70949 | 26.9587  | 28.25218 | 19.824   | 24.00049 |
| Dram2              | ENSRNOG00000017744 | 9.977345 | 10.15072 | 12.6298  | 8.967239 | 9.818375 | 11.52632 |
| Nde1               | ENSRNOG00000058007 | 25.96873 | 17.95742 | 28.00042 | 21.3679  | 13.09675 | 26.5246  |
| Aimp1              | ENSRNOG00000011384 | 40.99617 | 27.03897 | 41.35213 | 38.10718 | 25.62796 | 36.9396  |
| Pskh1              | ENSRNOG00000019290 | 7.559038 | 7.278102 | 6.525431 | 6.804084 | 7.032514 | 6.047493 |
| Traf5              | ENSRNOG00000047957 | 14.73306 | 18.25663 | 17.43439 | 13.9437  | 17.89964 | 16.28727 |
| Entpd7             | ENSRNOG00000045548 | 2.049466 | 1.968999 | 1.865847 | 1.759169 | 1.882877 | 1.62246  |
| Dnajc5             | ENSRNOG00000015202 | 49.78739 | 47.66675 | 51.08179 | 47.49952 | 40.38409 | 46.17719 |
| Rpa2               | ENSRNOG00000013005 | 39.63325 | 15.12179 | 27.91398 | 34.10968 | 9.506082 | 26.19032 |

|             |                     |          |          |          |          |          |          |
|-------------|---------------------|----------|----------|----------|----------|----------|----------|
| Capza1      | ENSRNOG00000013538  | 72.08323 | 48.87946 | 66.36673 | 65.6634  | 41.46458 | 64.1676  |
| Bid         | ENSRNOG00000012439  | 33.55295 | 38.71267 | 31.10221 | 31.53152 | 31.96594 | 24.83117 |
| Armc6       | ENSRNOG00000020280  | 10.23887 | 12.26935 | 12.77778 | 9.341048 | 9.420685 | 10.88556 |
| Eef2        | ENSRNOG00000020266  | 1506.69  | 2219.316 | 1621.707 | 1423.796 | 1954.272 | 1443.34  |
| Hbp1        | ENSRNOG00000008927  | 32.56713 | 47.92041 | 36.60392 | 31.56717 | 44.76837 | 33.28084 |
| Grm1        | ENSRNOG00000014290  | 0.397317 | 0.126217 | 0.267393 | 0.267432 | 0.053849 | 0.221591 |
| Ngdn        | ENSRNOG00000018069  | 42.79728 | 36.91729 | 38.04973 | 38.00683 | 27.63115 | 34.56585 |
| Stmn1       | ENSRNOG00000016810  | 104.0618 | 54.4437  | 179.1529 | 97.34457 | 32.29954 | 163.2917 |
| Cpeb1       | ENSRNOG00000019161  | 13.65635 | 17.27518 | 11.78548 | 13.14603 | 17.12519 | 11.35568 |
| Rpp14       | ENSRNOG00000039829  | 40.76139 | 36.34334 | 50.34877 | 32.7527  | 33.87615 | 44.82673 |
| Gipc1       | ENSRNOG00000003864  | 67.30246 | 65.1689  | 71.51586 | 61.56789 | 52.32576 | 66.02483 |
| Zfp212      | ENSRNOG00000006711  | 24.11879 | 16.50877 | 16.92082 | 21.80371 | 15.8248  | 15.11412 |
| Hmbs        | ENSRNOG00000010390  | 26.1056  | 22.01811 | 24.34385 | 24.54292 | 18.02247 | 22.38533 |
| Dnase2      | ENSRNOG00000023830  | 42.31186 | 57.5064  | 44.14843 | 37.07347 | 48.34526 | 40.99533 |
| Psm5        | ENSRNOG00000019868  | 181.531  | 125.6882 | 203.6647 | 167.7505 | 91.42216 | 187.4033 |
| Bcl7c       | ENSRNOG00000018916  | 31.68447 | 26.17618 | 34.38291 | 26.52242 | 22.60686 | 32.80086 |
| Gle1        | ENSRNOG00000015237  | 18.40513 | 11.76089 | 13.54279 | 16.1082  | 10.96574 | 12.24584 |
| Fip111      | ENSRNOG00000002275  | 42.95053 | 34.75036 | 38.21956 | 38.68056 | 33.3187  | 35.70079 |
| Nipsnap3b   | ENSRNOG00000010332  | 46.82255 | 28.28125 | 68.10496 | 42.54201 | 21.98775 | 56.28689 |
| Polr2g      | ENSRNOG00000019439  | 70.3074  | 59.59619 | 79.59572 | 65.12801 | 45.05068 | 71.68641 |
| Tomm70      | ENSRNOG00000001640  | 28.2009  | 27.93924 | 28.06444 | 26.00058 | 26.57714 | 27.35145 |
| Ccer2       | ENSRNOG00000046971  | 0.364113 | 0.422193 | 0.379708 | 0.145851 | 0.315217 | 0.041179 |
| Atic        | ENSRNOG00000015511  | 84.86349 | 66.22642 | 69.4449  | 83.02768 | 60.8259  | 66.33082 |
| RGD1597339  | ENSRNOG00000019701  | 39.0068  | 31.09903 | 43.67029 | 37.18184 | 25.03628 | 39.35303 |
| Fbxo46      | ENSRNOG00000008815  | 7.466138 | 8.320321 | 6.491976 | 7.01428  | 7.030899 | 5.778317 |
| mrpl24      | ENSRNOG00000022234  | 25.25263 | 20.69315 | 20.83151 | 19.17384 | 16.87393 | 18.88298 |
| Atp6v0e1    | ENSRNOG00000003269  | 32.0372  | 30.76756 | 31.98964 | 29.3005  | 23.65293 | 28.47357 |
| Ccdc90b     | ENSRNOG00000009462  | 17.0074  | 17.03338 | 13.76988 | 15.35669 | 16.48509 | 12.79071 |
| Kank3       | ENSRNOG00000007230  | 3.035118 | 3.629028 | 2.774713 | 2.156401 | 2.93403  | 2.519267 |
| Ube2c       | ENSRNOG00000015131  | 10.19117 | 4.113319 | 13.25677 | 9.223975 | 2.026863 | 12.41116 |
| Tubgcp4     | ENSRNOG00000012798  | 17.21329 | 14.03134 | 14.32696 | 16.2414  | 12.49738 | 13.84163 |
| Tor3a       | ENSRNOG00000004307  | 50.68823 | 26.89817 | 33.74828 | 45.27512 | 21.89196 | 32.16948 |
| Cdk5rap1    | ENSRNOG00000015696  | 8.924431 | 9.673764 | 8.178728 | 7.895118 | 8.615049 | 7.864932 |
| Wdr1        | ENSRNOG00000028498  | 192.5188 | 208.047  | 213.8768 | 173.6674 | 171.8937 | 200.7124 |
| Hif1a       | ENSRNOG00000008292  | 29.26666 | 36.63146 | 32.07266 | 28.12163 | 33.44953 | 30.3918  |
| Hist1h2bd   | ENSRNOG000000060769 | 176.0485 | 34.28383 | 85.74067 | 169.676  | 14.00442 | 63.85373 |
| Ufsp2       | ENSRNOG00000012087  | 27.62405 | 31.83763 | 30.45571 | 22.79636 | 23.8238  | 27.8458  |
| Mcrip2      | ENSRNOG00000020029  | 8.288287 | 5.182161 | 3.565546 | 7.239195 | 3.760366 | 3.148654 |
| Clta        | ENSRNOG00000014635  | 280.0955 | 340.0402 | 273.7261 | 259.0819 | 326.4241 | 267.1948 |
| Dph7        | ENSRNOG00000008102  | 16.40168 | 13.23091 | 16.00133 | 14.81807 | 11.89335 | 15.54705 |
| Stub1       | ENSRNOG00000019798  | 42.83898 | 43.14314 | 49.89203 | 39.2445  | 33.0323  | 44.48569 |
| Yipf5       | ENSRNOG00000014564  | 58.49334 | 54.84211 | 66.85915 | 53.06615 | 41.76089 | 60.98511 |
| Wdr5b       | ENSRNOG00000002253  | 3.402512 | 3.306495 | 4.148997 | 2.639323 | 2.985675 | 3.81135  |
| Plgrkt      | ENSRNOG00000015932  | 18.1512  | 16.73517 | 18.52496 | 15.74594 | 12.84308 | 17.28474 |
| Ppp1ca      | ENSRNOG00000018708  | 192.7321 | 193.0768 | 245.4665 | 181.1498 | 152.614  | 210.0314 |
| Kdelr2      | ENSRNOG00000001083  | 108.5801 | 122.3263 | 158.1744 | 102.6353 | 101.9101 | 138.8294 |
| Anxa7       | ENSRNOG00000007136  | 135.0477 | 143.5019 | 119.9224 | 131.9133 | 132.5551 | 110.2684 |
| Necap1      | ENSRNOG00000009236  | 33.50516 | 23.42438 | 30.23877 | 32.38162 | 19.63484 | 26.46507 |
| Pfdn1       | ENSRNOG00000018653  | 101.3486 | 86.66565 | 109.9253 | 95.64187 | 68.52599 | 98.55061 |
| AABR0704932 | ENSRNOG00000030107  | 176.1292 | 191.2286 | 185.8623 | 166.3783 | 160.3385 | 166.605  |
| 9.1         |                     |          |          |          |          |          |          |
| Abcf3       | ENSRNOG00000001710  | 32.23179 | 31.30776 | 30.88544 | 30.51534 | 26.12774 | 27.88129 |
| Trmt12      | ENSRNOG00000008978  | 6.93215  | 6.794708 | 6.575755 | 6.442131 | 5.441135 | 5.874598 |
| Amdhd2      | ENSRNOG00000006460  | 21.68259 | 35.75375 | 20.2171  | 20.54499 | 31.77487 | 16.6169  |
| Akt1s1      | ENSRNOG00000020289  | 21.73148 | 29.23506 | 20.95877 | 20.37165 | 28.73826 | 20.26306 |
| Ap1s3       | ENSRNOG00000049873  | 7.243208 | 4.534202 | 7.469329 | 6.771864 | 3.531872 | 7.075891 |

|                  |                    |          |          |          |          |          |          |
|------------------|--------------------|----------|----------|----------|----------|----------|----------|
| Ckap2            | ENSRNOG00000024650 | 82.13968 | 35.58247 | 133.1906 | 74.20726 | 18.61174 | 126.4932 |
| Rfc5             | ENSRNOG00000001134 | 32.11062 | 12.27074 | 24.29136 | 28.96978 | 8.275422 | 23.15704 |
| Ikbip            | ENSRNOG00000008247 | 64.63378 | 78.36205 | 82.19625 | 62.94941 | 72.50619 | 77.85201 |
| Ugt1a7c          | ENSRNOG00000018740 | 8.703205 | 5.490202 | 10.42147 | 7.68274  | 4.814274 | 10.11354 |
| Ufc1             | ENSRNOG00000003706 | 77.08981 | 80.20851 | 91.93352 | 70.97408 | 62.87302 | 82.785   |
| Vps72            | ENSRNOG00000021081 | 34.75234 | 26.32868 | 33.47176 | 31.73821 | 25.452   | 30.48991 |
| Scarb1           | ENSRNOG00000000981 | 18.05992 | 15.74435 | 22.37168 | 16.71476 | 12.53575 | 20.97339 |
| Slc43a2          | ENSRNOG00000003835 | 6.971502 | 9.250508 | 7.516101 | 6.741393 | 8.427531 | 6.82169  |
| Phyhd1           | ENSRNOG00000016794 | 62.45298 | 46.50562 | 43.24614 | 59.81398 | 38.82857 | 39.08701 |
| Elp2             | ENSRNOG00000015301 | 30.94755 | 29.56227 | 33.52484 | 30.01663 | 26.23343 | 30.80811 |
| Anxa1            | ENSRNOG00000017469 | 1519.719 | 1298.172 | 1833.234 | 1444.521 | 1058.254 | 1686.227 |
| Polr2b           | ENSRNOG00000024779 | 42.61569 | 36.34609 | 43.60108 | 40.6001  | 29.80565 | 39.49426 |
| Sharpin          | ENSRNOG00000012812 | 22.36922 | 22.72505 | 19.88641 | 20.71486 | 18.93775 | 18.31191 |
| Serpina9         | ENSRNOG00000042391 | 0.089403 | 0.103663 | 0.082873 | 0.071623 | 0.044227 | 0.020222 |
| Ergic3           | ENSRNOG00000031085 | 90.54233 | 96.99339 | 81.71317 | 80.2468  | 90.19254 | 78.63693 |
| St6galnac6       | ENSRNOG00000046984 | 11.78104 | 15.13694 | 14.9668  | 11.23054 | 13.20395 | 13.10765 |
| Col4a5           | ENSRNOG00000018951 | 40.87577 | 80.63419 | 46.74356 | 40.04096 | 78.17167 | 45.3978  |
| Stard3nl         | ENSRNOG00000052429 | 25.52991 | 24.54983 | 28.08377 | 22.70972 | 23.60973 | 26.51111 |
| Adipor2          | ENSRNOG00000007990 | 61.81967 | 72.69899 | 83.87288 | 54.34846 | 62.01195 | 80.78124 |
| Vopp1            | ENSRNOG00000006646 | 40.14099 | 30.91652 | 41.10864 | 38.24481 | 24.98614 | 37.61347 |
| Eef1a1           | ENSRNOG00000009439 | 3641.024 | 4371.192 | 3957.118 | 3387.699 | 3559.611 | 3461.948 |
| Oas1a            | ENSRNOG00000001369 | 92.56086 | 11.50174 | 55.37868 | 87.97542 | 7.002305 | 54.06815 |
| Nmt1             | ENSRNOG00000002989 | 72.84943 | 68.25532 | 76.21428 | 70.42742 | 59.72078 | 67.97547 |
| Med9             | ENSRNOG00000053961 | 13.33484 | 10.09189 | 10.62145 | 12.41014 | 7.426172 | 9.210996 |
| Ndufa6           | ENSRNOG00000008569 | 132.9109 | 111.2299 | 133.7055 | 118.9307 | 105.9906 | 115.0591 |
| Rab10            | ENSRNOG00000047088 | 73.68657 | 62.92161 | 69.43343 | 70.65285 | 56.23942 | 66.78009 |
| Nhej1            | ENSRNOG00000018162 | 3.805477 | 5.208592 | 4.292229 | 3.496395 | 4.344331 | 3.852283 |
| Fam126a          | ENSRNOG00000010517 | 5.308071 | 4.815893 | 6.821108 | 4.396151 | 4.517928 | 6.302378 |
| Ncbp2            | ENSRNOG00000001746 | 28.38136 | 33.39147 | 34.10623 | 26.34679 | 32.05982 | 30.25919 |
| Esrra            | ENSRNOG00000021139 | 27.56971 | 27.72257 | 29.52743 | 25.3007  | 22.7625  | 27.57493 |
| Tubb5            | ENSRNOG00000061216 | 962.9022 | 542.1086 | 1158.221 | 907.272  | 381.1728 | 1073.043 |
| Tmem97           | ENSRNOG00000022657 | 69.31917 | 61.24179 | 124.922  | 60.89078 | 36.04298 | 111.0328 |
| Fut10            | ENSRNOG00000050857 | 4.950365 | 4.870577 | 7.92037  | 4.760105 | 4.198134 | 7.266009 |
| Polb             | ENSRNOG00000019150 | 16.59148 | 16.32043 | 17.92791 | 15.37341 | 13.15151 | 16.44483 |
| Apool            | ENSRNOG00000004512 | 20.42567 | 13.75945 | 20.71111 | 19.74162 | 11.40866 | 18.28723 |
| Kif2c            | ENSRNOG00000019100 | 27.23316 | 12.07856 | 40.99755 | 24.45809 | 4.94317  | 37.70799 |
| Coq8b            | ENSRNOG00000020848 | 12.48652 | 12.9785  | 17.38665 | 12.01741 | 11.57412 | 15.6733  |
| Mars             | ENSRNOG00000025459 | 61.70041 | 60.23758 | 69.36291 | 54.65093 | 43.57154 | 62.32938 |
| Fen1             | ENSRNOG00000020531 | 24.35854 | 8.96431  | 15.56037 | 21.60571 | 5.028673 | 14.43667 |
| Slc20a2          | ENSRNOG00000019490 | 23.894   | 39.0282  | 19.32762 | 22.47657 | 36.79167 | 18.65469 |
| Rps911           | ENSRNOG00000058909 | 267.2381 | 333.947  | 340.8077 | 245.0407 | 262.4256 | 297.612  |
| LOC500124        | ENSRNOG00000010594 | 0.32158  | 0.456224 | 0.245487 | 0.202061 | 0.411745 | 0.085573 |
| RT1-M3-1         | ENSRNOG00000000763 | 25.01925 | 17.24619 | 17.19653 | 24.14773 | 14.72384 | 14.0145  |
| Pigu             | ENSRNOG00000025181 | 10.32191 | 7.89997  | 9.331326 | 8.649063 | 7.379601 | 7.424742 |
| Sqor             | ENSRNOG00000000172 | 213.2724 | 127.9555 | 178.251  | 193.4233 | 100.0386 | 170.3595 |
| Snrpb2           | ENSRNOG00000004967 | 25.08137 | 24.82125 | 31.69759 | 22.3131  | 21.82147 | 30.87193 |
| Dhrs7b           | ENSRNOG00000005360 | 23.55203 | 16.48249 | 20.25201 | 21.06919 | 12.32825 | 18.95777 |
| LOC10369217<br>3 | ENSRNOG00000008720 | 35.99895 | 32.40766 | 47.10057 | 33.91484 | 28.74344 | 40.64731 |
| Ift20            | ENSRNOG00000008891 | 34.21441 | 42.37865 | 45.99654 | 31.45319 | 32.99344 | 39.8858  |
| Gbe1             | ENSRNOG00000051232 | 7.647935 | 8.230345 | 11.40089 | 7.278638 | 6.960905 | 10.06675 |
| Prr30            | ENSRNOG00000025726 | 0.056692 | 0.105176 | 0.052551 | 0        | 0.037394 | 0.034195 |
| Abt1             | ENSRNOG00000017585 | 20.9996  | 16.61955 | 18.92655 | 18.36131 | 14.2732  | 18.20979 |
| AC096024.2       | ENSRNOG00000034206 | 0.26917  | 0.749052 | 0.249509 | 0        | 0.133156 | 0        |
| Lman2            | ENSRNOG00000016161 | 152.2651 | 141.0662 | 159.163  | 142.0388 | 117.132  | 149.2567 |
| Tcirg1           | ENSRNOG00000017220 | 48.60246 | 36.65563 | 38.62705 | 43.75403 | 31.53697 | 37.217   |



|                |                    |          |          |          |          |          |          |
|----------------|--------------------|----------|----------|----------|----------|----------|----------|
| Psm1d          | ENSRNOG00000017730 | 95.71495 | 84.36143 | 108.0156 | 89.24851 | 67.57838 | 100.2945 |
| Pygb           | ENSRNOG00000007583 | 38.98882 | 39.00525 | 37.24894 | 36.75293 | 33.84495 | 35.14378 |
| Rpl26          | ENSRNOG00000004214 | 583.8246 | 616.516  | 600.6828 | 547.2815 | 495.6846 | 525.9577 |
| Shmt2          | ENSRNOG00000008106 | 61.87014 | 43.97928 | 81.85823 | 58.1243  | 30.72311 | 72.62709 |
| Spr            | ENSRNOG00000015455 | 30.38243 | 15.40055 | 34.98607 | 27.36992 | 11.47097 | 26.81235 |
| Brox           | ENSRNOG00000052963 | 28.12813 | 32.89123 | 29.55428 | 27.52394 | 30.95513 | 27.31008 |
| Kazald1        | ENSRNOG00000016058 | 51.78634 | 70.49932 | 70.36411 | 45.96963 | 58.77217 | 66.16434 |
| Egln1          | ENSRNOG00000019773 | 66.17406 | 60.75886 | 97.18772 | 58.4549  | 54.42092 | 80.53826 |
| Krt80          | ENSRNOG00000025994 | 0.330991 | 0.318402 | 0.204544 | 0.170231 | 0.254705 | 0.133094 |
| Ppp4c          | ENSRNOG00000019813 | 89.13841 | 65.39631 | 84.99854 | 86.32166 | 54.97213 | 76.80698 |
| Ccs            | ENSRNOG00000047816 | 32.093   | 27.75785 | 28.42951 | 31.27638 | 24.97943 | 25.41792 |
| Pqbp1          | ENSRNOG00000007766 | 36.60332 | 28.95265 | 37.78743 | 34.08091 | 20.71201 | 32.83135 |
| Tcf3           | ENSRNOG00000051499 | 34.47762 | 28.02264 | 31.82213 | 32.17684 | 27.21612 | 30.65767 |
| Ebag9          | ENSRNOG00000004220 | 14.75005 | 12.12377 | 14.30653 | 13.20969 | 11.61681 | 13.46873 |
| Rack1          | ENSRNOG00000052620 | 613.4509 | 692.3256 | 671.0484 | 584.2728 | 594.2468 | 609.8329 |
| Peyox11        | ENSRNOG00000019643 | 10.28503 | 10.60858 | 10.23934 | 8.651381 | 8.51529  | 9.676107 |
| Fopn1          | ENSRNOG00000053230 | 44.62026 | 27.60141 | 50.78642 | 41.59764 | 21.06478 | 48.3084  |
| Hgh1           | ENSRNOG00000029238 | 11.54079 | 10.1963  | 12.91757 | 11.20851 | 9.098444 | 11.67516 |
| Slc16a1        | ENSRNOG00000019996 | 20.609   | 15.25166 | 24.10005 | 19.93357 | 12.77192 | 21.733   |
| Gfpt2          | ENSRNOG00000002810 | 2.632828 | 1.279266 | 2.951872 | 2.303425 | 1.153592 | 2.495462 |
| Uqcc3          | ENSRNOG00000045561 | 31.50863 | 36.8501  | 37.93406 | 28.65763 | 32.52024 | 29.59038 |
| Ndufaf6        | ENSRNOG00000040040 | 10.24693 | 5.773256 | 8.574134 | 9.806884 | 5.579395 | 8.399749 |
| Psm13          | ENSRNOG00000014109 | 92.17262 | 75.23744 | 105.1521 | 84.82247 | 56.86318 | 97.15043 |
| Atp6v1d        | ENSRNOG00000009080 | 113.0827 | 106.0001 | 76.76802 | 107.1848 | 96.46526 | 73.93049 |
| Arcn1          | ENSRNOG00000061108 | 90.99478 | 91.73566 | 114.2564 | 88.2216  | 81.25834 | 105.5149 |
| Mrto4          | ENSRNOG00000017979 | 36.85636 | 23.10922 | 35.62852 | 35.87614 | 19.65829 | 31.99164 |
| LOC100362684   | ENSRNOG00000030596 | 1354.794 | 1400.3   | 1548.407 | 1266.443 | 1074.788 | 1309.633 |
| Zfp788         | ENSRNOG00000014380 | 1.821718 | 1.551123 | 1.184581 | 1.379566 | 1.398864 | 0.959392 |
| Ppp2r3c        | ENSRNOG00000023591 | 16.20405 | 16.19809 | 15.86502 | 15.33922 | 14.91604 | 15.50441 |
| Hmgcl          | ENSRNOG00000009422 | 15.2575  | 21.45246 | 16.5589  | 14.78413 | 19.90211 | 14.7656  |
| LOC10091141    | ENSRNOG00000046299 | 45.15726 | 36.35044 | 51.13842 | 41.95606 | 31.60413 | 41.82729 |
| Malsu1         | ENSRNOG00000009035 | 36.29248 | 30.68105 | 41.42302 | 32.59196 | 29.44198 | 36.7465  |
| Rrp36          | ENSRNOG00000017836 | 43.70474 | 31.92834 | 30.95498 | 37.64333 | 23.09225 | 28.49591 |
| Spsb2          | ENSRNOG00000047113 | 3.794376 | 3.773115 | 3.995575 | 3.145172 | 3.123414 | 3.817423 |
| Rpp30          | ENSRNOG00000018718 | 11.9071  | 8.259626 | 11.01319 | 10.68273 | 7.931319 | 9.8515   |
| Rom1           | ENSRNOG00000019858 | 16.61295 | 16.42415 | 19.85728 | 14.60634 | 13.52897 | 14.08555 |
| Cenpn          | ENSRNOG00000011296 | 14.18159 | 6.773733 | 14.38568 | 12.52406 | 2.984473 | 12.89244 |
| Atp5c1         | ENSRNOG00000019223 | 22.66521 | 19.65658 | 25.64019 | 21.70871 | 16.15463 | 22.13117 |
| Degs1          | ENSRNOG00000003223 | 89.86188 | 94.48219 | 100.5441 | 84.62815 | 78.67036 | 92.17681 |
| Rrad           | ENSRNOG00000011901 | 6.766282 | 6.828239 | 5.720676 | 4.765432 | 3.604712 | 4.776306 |
| Dnajb11        | ENSRNOG00000001803 | 92.08992 | 76.90999 | 97.33905 | 77.99099 | 50.85797 | 88.88865 |
| Gtf2h3         | ENSRNOG00000001035 | 12.49262 | 9.687193 | 11.7949  | 11.2313  | 7.634653 | 11.18974 |
| Pmpcb          | ENSRNOG00000012693 | 68.40589 | 60.23908 | 71.23041 | 65.69102 | 49.94404 | 61.78161 |
| Zfp180         | ENSRNOG00000029336 | 10.7215  | 11.40034 | 10.16889 | 9.776965 | 11.0903  | 9.665583 |
| AABR07033324.1 | ENSRNOG00000061099 | 176.1565 | 171.1035 | 134.0696 | 141.6904 | 148.7553 | 124.2656 |
| LOC100911252   | ENSRNOG00000031045 | 1011.475 | 1012.77  | 1518.689 | 926.9648 | 722.2979 | 1337.411 |
| Rbm42          | ENSRNOG00000024278 | 60.47483 | 56.98478 | 54.79912 | 56.65672 | 46.53185 | 49.88111 |
| Ttc39c         | ENSRNOG00000050949 | 29.84122 | 15.83679 | 25.17421 | 28.77849 | 14.73552 | 24.88045 |
| Rps11          | ENSRNOG00000020595 | 516.1833 | 587.5891 | 608.8452 | 487.5656 | 485.4729 | 541.1823 |
| Man2c1         | ENSRNOG00000030654 | 35.13635 | 30.84962 | 25.91403 | 31.17528 | 26.75257 | 24.82068 |
| Ltv1           | ENSRNOG00000015217 | 16.41906 | 15.47016 | 17.02553 | 14.99047 | 14.69111 | 14.51332 |
| Usp16          | ENSRNOG00000001598 | 14.09557 | 16.95064 | 17.49375 | 12.85992 | 14.42242 | 16.60346 |
| Slc25a32       | ENSRNOG00000004403 | 6.133461 | 7.802246 | 7.721377 | 5.248239 | 6.808799 | 7.462723 |
| Tmem52b        | ENSRNOG00000058653 | 0.059249 | 0.09618  | 0.054922 | 0        | 0        | 0.026803 |

|             |                    |          |          |          |          |          |          |
|-------------|--------------------|----------|----------|----------|----------|----------|----------|
| Tmem39a     | ENSRNOG00000003075 | 23.65144 | 23.78574 | 25.64779 | 22.26777 | 21.59211 | 25.01672 |
| Phka1       | ENSRNOG00000003063 | 4.287878 | 4.655512 | 4.342813 | 4.162144 | 4.361951 | 3.895048 |
| AABR0707304 |                    |          |          |          |          |          |          |
| 5.1         | ENSRNOG00000060344 | 82.18912 | 93.35582 | 108.9011 | 76.34492 | 76.53344 | 86.68044 |
| Tnip2       | ENSRNOG00000013805 | 18.78633 | 15.74698 | 16.97826 | 17.37975 | 14.72532 | 14.08245 |
| Comt        | ENSRNOG00000001889 | 126.1431 | 170.4926 | 150.5659 | 117.3607 | 148.9203 | 141.5583 |
| Dus2        | ENSRNOG00000019819 | 6.730141 | 5.955079 | 4.746344 | 5.365829 | 4.931666 | 4.386921 |
| Map3k8      | ENSRNOG00000016378 | 6.15858  | 6.411781 | 6.961304 | 5.940026 | 6.067504 | 6.300748 |
| Bcl10       | ENSRNOG00000042389 | 23.27953 | 25.66373 | 29.7998  | 22.12045 | 22.23903 | 28.06131 |
| Copg1       | ENSRNOG00000010474 | 94.82661 | 94.92489 | 105.2709 | 86.28352 | 75.90886 | 98.08189 |
| Melk        | ENSRNOG00000013598 | 23.02891 | 8.088812 | 18.48101 | 19.74404 | 3.93467  | 17.40454 |
| Sgpp1       | ENSRNOG00000005175 | 17.02138 | 16.99799 | 17.69591 | 14.49379 | 15.93688 | 16.67622 |
| Egln2       | ENSRNOG00000020947 | 47.54587 | 52.18502 | 49.15304 | 45.63995 | 46.12509 | 45.80364 |
| Acy3        | ENSRNOG00000017901 | 11.32973 | 11.24339 | 9.376023 | 9.68774  | 10.45472 | 8.793437 |
| LOC10254854 |                    |          |          |          |          |          |          |
| 1           | ENSRNOG00000049135 | 0.12035  | 0.502369 | 0.167339 | 0.064277 | 0.416754 | 0        |
| Abcb6       | ENSRNOG00000018697 | 9.481452 | 9.662537 | 14.57997 | 8.171648 | 8.956753 | 12.27986 |
| Aup1        | ENSRNOG00000007842 | 58.8701  | 54.09439 | 50.2163  | 56.09067 | 45.13942 | 45.19297 |
| Utp11       | ENSRNOG00000007174 | 26.40976 | 22.09305 | 24.92971 | 23.58461 | 19.78735 | 24.20334 |
| Ikbke       | ENSRNOG00000025100 | 18.57145 | 18.61597 | 18.23711 | 17.8538  | 18.40879 | 17.43247 |
| Abraxas2    | ENSRNOG00000017222 | 18.96971 | 14.83194 | 15.89589 | 18.19119 | 12.23922 | 14.38072 |
| Copa        | ENSRNOG00000006247 | 100.5321 | 120.7058 | 122.3726 | 98.39931 | 112.4577 | 114.7792 |
| Lrrc56      | ENSRNOG00000016697 | 0.75839  | 0.523527 | 0.555858 | 0.32027  | 0.401345 | 0.271268 |
| Mrpl2       | ENSRNOG00000018057 | 25.08013 | 24.68151 | 20.97612 | 22.27438 | 19.26067 | 19.18777 |
| Tyms        | ENSRNOG00000037225 | 69.08945 | 40.67778 | 50.40239 | 65.39007 | 31.47246 | 46.55384 |
| Atp5h       | ENSRNOG00000003626 | 188.8807 | 186.1743 | 210.1542 | 179.7835 | 157.6327 | 194.806  |
| Ppdpf       | ENSRNOG00000012722 | 33.05463 | 35.99195 | 37.49612 | 30.99336 | 28.93244 | 29.3912  |
| Pgam1       | ENSRNOG00000050585 | 399.4177 | 203.087  | 511.4681 | 375.3719 | 167.9455 | 440.8016 |
| Illrn       | ENSRNOG00000005871 | 318.5419 | 146.563  | 350.5392 | 301.3291 | 137.3844 | 320.3057 |
| Rsrp1       | ENSRNOG00000017309 | 27.77519 | 64.11589 | 43.39671 | 25.08725 | 62.89499 | 42.40366 |
| Alkbh3      | ENSRNOG00000021678 | 35.22468 | 28.74933 | 37.67944 | 34.18819 | 24.82604 | 34.88903 |
| Iars2       | ENSRNOG00000002368 | 30.89608 | 33.56555 | 31.71187 | 30.24156 | 31.60998 | 29.16553 |
| Cd2bp2      | ENSRNOG00000017201 | 62.15741 | 60.53348 | 56.75884 | 55.9658  | 49.45778 | 53.35016 |
| Taok2       | ENSRNOG00000019964 | 37.26985 | 39.01834 | 38.22034 | 35.745   | 36.50798 | 33.47869 |
| Bloc1s1     | ENSRNOG00000007784 | 133.0665 | 133.0312 | 143.037  | 121.0591 | 100.5371 | 128.3261 |
| Etf1        | ENSRNOG00000019450 | 81.05768 | 62.88659 | 84.10807 | 78.1435  | 59.76616 | 83.30878 |
| Kpna6       | ENSRNOG00000000127 | 36.61765 | 29.44538 | 33.80907 | 31.60861 | 25.51125 | 32.5338  |
| Cenpt       | ENSRNOG00000024178 | 18.25098 | 6.07498  | 18.59738 | 15.53582 | 3.683814 | 17.91104 |
| Gadd45g     | ENSRNOG00000013090 | 36.27454 | 12.78199 | 45.44007 | 32.45522 | 5.794132 | 43.26016 |
| Naa10       | ENSRNOG00000060063 | 26.06023 | 19.49492 | 28.4983  | 24.62987 | 14.81272 | 22.81723 |
| Afm         | ENSRNOG00000002878 | 0.037233 | 0.086343 | 0.05177  | 0.019886 | 0.018419 | 0        |
| AC096601.1  | ENSRNOG00000024177 | 0.403754 | 1.217209 | 0.46783  | 0.32346  | 0.898805 | 0.182647 |
| Eif2s3      | ENSRNOG00000060793 | 52.2158  | 51.40282 | 49.22411 | 47.71743 | 48.04493 | 48.06868 |
| Abhd5       | ENSRNOG00000000221 | 13.27157 | 18.9256  | 17.11062 | 12.35142 | 16.8176  | 16.30851 |
| LOC10091067 |                    |          |          |          |          |          |          |
| 8           | ENSRNOG00000043400 | 13.8643  | 8.752384 | 12.67314 | 13.36969 | 6.858574 | 11.32411 |
| Haus4       | ENSRNOG00000039284 | 33.35547 | 18.95575 | 42.60372 | 30.08826 | 11.10441 | 39.47719 |
| Nptn        | ENSRNOG00000009029 | 106.5355 | 112.3678 | 106.8751 | 100.3153 | 96.61053 | 100.271  |
| Prdx2       | ENSRNOG00000003520 | 226.7951 | 256.8581 | 302.4909 | 213.4571 | 207.5515 | 269.9558 |
| Tbc1d10b    | ENSRNOG00000017349 | 32.04973 | 30.89749 | 29.6621  | 31.15768 | 29.54709 | 26.97373 |
| LOC691807   | ENSRNOG00000014654 | 50.48274 | 42.28086 | 50.59837 | 47.8709  | 34.50191 | 46.74339 |
| Nars        | ENSRNOG00000017852 | 108.6161 | 109.3007 | 114.3891 | 98.19644 | 85.05609 | 105.1084 |
| Akr1a1      | ENSRNOG00000016727 | 520.9832 | 438.9585 | 592.8498 | 482.1729 | 314.7869 | 526.2049 |
| Arsk        | ENSRNOG00000026937 | 7.13664  | 9.205073 | 5.817934 | 5.487654 | 8.127819 | 5.371551 |
| Glod4       | ENSRNOG00000007788 | 42.34265 | 35.83496 | 43.88441 | 41.43042 | 33.27491 | 40.33776 |
| Cav2        | ENSRNOG00000057713 | 27.40318 | 27.21209 | 25.59756 | 22.86877 | 19.74793 | 23.48147 |
| Ing4        | ENSRNOG00000023363 | 26.06464 | 26.39171 | 25.16847 | 25.16597 | 25.3204  | 22.74798 |

|                    |                    |          |          |          |          |          |          |
|--------------------|--------------------|----------|----------|----------|----------|----------|----------|
| Dennd2c            | ENSRNOG00000018716 | 0.345134 | 0.568428 | 0.600675 | 0.308473 | 0.466909 | 0.554416 |
| Gmpr2              | ENSRNOG00000020216 | 11.77426 | 10.68629 | 12.23007 | 11.23628 | 8.618705 | 10.12545 |
| Rps6kb1            | ENSRNOG00000003919 | 27.37581 | 22.70652 | 28.73331 | 24.4769  | 19.69096 | 27.97019 |
| Dph1               | ENSRNOG00000003116 | 7.432805 | 6.630377 | 7.11838  | 6.178851 | 4.961035 | 6.696902 |
| Tmbim6             | ENSRNOG00000055579 | 307.2785 | 370.7937 | 333.0702 | 278.1387 | 297.2808 | 302.7172 |
| LOC10255634<br>7   | ENSRNOG00000049911 | 15.27627 | 17.61072 | 16.50197 | 14.13346 | 13.58685 | 14.07502 |
| Gnl3               | ENSRNOG00000028461 | 44.39384 | 47.06299 | 43.53504 | 35.66856 | 43.6357  | 39.90261 |
| Polr3k             | ENSRNOG00000017843 | 27.8603  | 24.90501 | 28.06163 | 25.56173 | 23.21432 | 23.19975 |
| C17h6orf52         | ENSRNOG00000039379 | 1.591267 | 2.401372 | 2.575815 | 1.29384  | 1.268901 | 1.396711 |
| AABR0706895<br>5.1 | ENSRNOG00000033199 | 0.427911 | 0.2977   | 0.793311 | 0.228542 | 0        | 0.193574 |
| Stk38l             | ENSRNOG00000001828 | 11.05392 | 15.38812 | 14.69827 | 10.48591 | 14.02107 | 12.59325 |
| Pdha1              | ENSRNOG00000025383 | 70.04283 | 93.57947 | 100.0177 | 63.78978 | 74.94789 | 90.87444 |
| Scnm1              | ENSRNOG00000021092 | 19.13632 | 11.57675 | 11.90396 | 15.76541 | 9.878196 | 10.80045 |
| LOC10091260<br>4   | ENSRNOG00000046379 | 45.712   | 30.95758 | 40.94714 | 44.0663  | 25.22265 | 34.25637 |
| Ppp2ca             | ENSRNOG00000056485 | 85.31328 | 68.61316 | 84.1719  | 72.92948 | 53.3291  | 80.40115 |
| Zw10               | ENSRNOG00000054479 | 26.50779 | 16.97331 | 25.02007 | 23.77058 | 12.48677 | 23.76389 |
| RGD1561849         | ENSRNOG00000021663 | 5.230386 | 3.252157 | 8.41581  | 4.76966  | 2.530942 | 6.994909 |
| RGD1305014         | ENSRNOG00000020597 | 3.998457 | 4.113622 | 4.599313 | 3.649808 | 3.506471 | 3.469583 |
| Birc3              | ENSRNOG00000005731 | 8.711137 | 5.510149 | 5.521671 | 6.114726 | 4.465296 | 4.473597 |
| D2hgdh             | ENSRNOG00000019012 | 6.351752 | 7.637344 | 7.747631 | 5.407838 | 7.405437 | 6.903566 |
| Spata13            | ENSRNOG00000013707 | 0.745587 | 1.119321 | 0.554722 | 0.717824 | 1.028861 | 0.505923 |
| Emp3               | ENSRNOG00000021104 | 413.4012 | 324.9452 | 401.0628 | 389.8666 | 228.7642 | 323.5992 |
| Cwc27              | ENSRNOG00000013252 | 8.83031  | 6.184788 | 8.381302 | 8.233734 | 6.033555 | 7.783177 |
| Fkbp4              | ENSRNOG00000006444 | 80.98473 | 57.55365 | 76.17062 | 75.25558 | 51.46241 | 74.66746 |
| Api5               | ENSRNOG00000009689 | 67.79301 | 54.2309  | 71.63488 | 61.52359 | 50.69747 | 69.78583 |
| Abcd4              | ENSRNOG00000011964 | 8.200388 | 12.78172 | 15.52884 | 7.359303 | 9.34696  | 12.81374 |
| LOC10036052<br>2   | ENSRNOG00000013874 | 2837.307 | 3388.781 | 3138.271 | 2752.484 | 3074.213 | 2791.073 |
| Plau               | ENSRNOG00000010516 | 1.521992 | 0.613024 | 0.408397 | 1.048183 | 0.376459 | 0.25366  |
| Ryk                | ENSRNOG00000008593 | 120.1809 | 127.9268 | 150.03   | 103.0744 | 101.013  | 142.7765 |
| Ano2               | ENSRNOG00000023561 | 0.024908 | 0.034658 | 0.069267 | 0.013303 | 0        | 0.022536 |
| RGD1564937         | ENSRNOG00000030962 | 0.097026 | 0.112503 | 0.04497  | 0.05182  | 0        | 0        |
| Wdr83os            | ENSRNOG00000033611 | 143.2954 | 94.31063 | 126.8348 | 130.7172 | 61.18291 | 112.8314 |
| Arap2              | ENSRNOG00000056826 | 3.353154 | 4.892573 | 2.272689 | 2.73996  | 3.801695 | 1.952593 |
| Gprasp2            | ENSRNOG00000037658 | 5.526491 | 3.82086  | 3.818184 | 5.379137 | 3.525986 | 3.306109 |
| Pid1               | ENSRNOG00000029735 | 37.09659 | 30.3691  | 30.13209 | 34.62583 | 29.33414 | 29.18765 |
| Puf60              | ENSRNOG00000009960 | 90.60772 | 77.68448 | 98.65451 | 87.02752 | 64.95588 | 91.12037 |
| Slc36a4            | ENSRNOG00000011455 | 7.611142 | 11.17174 | 10.82348 | 7.399546 | 10.81315 | 10.14014 |
| Vamp3              | ENSRNOG00000030055 | 77.52011 | 74.43818 | 78.35007 | 71.78146 | 58.86677 | 71.59651 |
| Golga5             | ENSRNOG00000007699 | 21.19804 | 23.60431 | 23.03293 | 19.41515 | 21.85415 | 18.61081 |
|                    | ENSRNOG00000000916 | 1.657518 | 1.123578 | 1.75313  | 1.112249 | 0.98816  | 1.211237 |
| Gtpbp3             | ENSRNOG00000023403 | 3.57117  | 3.821229 | 3.310328 | 3.339783 | 2.858867 | 2.533847 |
| Tmem2              | ENSRNOG00000012782 | 17.85273 | 7.81533  | 16.81702 | 15.96691 | 7.179835 | 15.91937 |
| Thg11              | ENSRNOG00000005539 | 6.454516 | 5.852552 | 7.404052 | 6.153388 | 4.645822 | 6.190057 |
| Ufd1               | ENSRNOG00000047394 | 42.44508 | 36.10406 | 41.6425  | 40.24035 | 27.96936 | 36.60411 |
| Naprt              | ENSRNOG00000007939 | 27.67962 | 24.61616 | 20.53672 | 25.66579 | 20.30776 | 19.06177 |
| Inpp5k             | ENSRNOG00000056954 | 28.52107 | 41.96148 | 27.68095 | 27.34476 | 39.23559 | 23.31264 |
| Rab32              | ENSRNOG00000014258 | 97.71378 | 77.11097 | 94.00239 | 86.12709 | 66.30998 | 91.20269 |
| Ccdc17             | ENSRNOG00000023216 | 6.380789 | 6.236241 | 5.391443 | 5.335692 | 5.432959 | 5.13841  |
| Pygo2              | ENSRNOG00000020663 | 21.59424 | 21.26531 | 20.73355 | 18.81593 | 16.71339 | 19.49137 |
| Cct7               | ENSRNOG00000015630 | 115.91   | 94.13875 | 127.0592 | 108.6623 | 73.4793  | 117.6869 |
| AABR0705252<br>3.1 | ENSRNOG00000028543 | 180.5109 | 114.9671 | 279.8937 | 172.0163 | 79.45235 | 247.6757 |
| Spryd4             | ENSRNOG00000003127 | 13.18539 | 11.2411  | 11.89262 | 11.99472 | 7.716669 | 10.22847 |

|                |                     |          |          |          |          |          |          |
|----------------|---------------------|----------|----------|----------|----------|----------|----------|
| LOC100365810   | ENSRNOG00000045885  | 291.8342 | 322.2713 | 382.8717 | 268.4751 | 250.8577 | 287.0161 |
| Mrpl54         | ENSRNOG00000020464  | 69.56732 | 55.46724 | 77.36049 | 66.62961 | 47.66952 | 65.83179 |
| Ptpn11         | ENSRNOG00000030124  | 65.13807 | 62.64911 | 71.68082 | 62.177   | 56.08145 | 69.36782 |
| Bop1           | ENSRNOG00000021773  | 27.09779 | 19.23498 | 22.74569 | 24.83558 | 14.98613 | 21.46053 |
| Pomgnt1        | ENSRNOG00000023455  | 41.07976 | 28.73037 | 34.44716 | 37.12158 | 25.42461 | 33.50883 |
| Tars2          | ENSRNOG00000057194  | 16.51142 | 11.69408 | 14.03489 | 15.91764 | 9.240347 | 12.18447 |
| Selenot        | ENSRNOG00000013507  | 107.1955 | 84.76235 | 116.6979 | 99.82151 | 77.07422 | 114.8389 |
| Smim8          | ENSRNOG00000023035  | 4.40249  | 3.917588 | 4.484276 | 4.10113  | 2.785663 | 3.774702 |
| Usf1           | ENSRNOG00000004255  | 41.67911 | 45.1021  | 44.40832 | 39.27444 | 37.6807  | 40.7587  |
| Dph2           | ENSRNOG00000019735  | 7.091649 | 6.448972 | 6.525213 | 6.793413 | 5.395889 | 5.265315 |
| Ndufs7         | ENSRNOG00000024568  | 72.68688 | 58.86815 | 63.04912 | 64.76325 | 41.99799 | 57.34777 |
| Rsl1d111       | ENSRNOG00000048608  | 11.47409 | 9.094876 | 9.628904 | 9.623909 | 8.442128 | 7.000647 |
| Tpm3           | ENSRNOG00000017441  | 146.5551 | 83.53233 | 146.9045 | 142.3266 | 66.21123 | 129.7948 |
| Myg1           | ENSRNOG00000013343  | 49.0207  | 39.92666 | 40.34801 | 40.07454 | 34.81671 | 37.80224 |
| Vps4a          | ENSRNOG00000020351  | 35.54127 | 30.74033 | 35.72843 | 31.24938 | 29.27862 | 33.73463 |
| Pole           | ENSRNOG00000037449  | 13.41683 | 5.163586 | 8.39904  | 12.41162 | 3.028326 | 7.681197 |
| Gpx8           | ENSRNOG00000010461  | 222.0774 | 187.7327 | 200.1539 | 213.7261 | 161.3008 | 186.8478 |
| Rps15a         | ENSRNOG00000018320  | 420.5087 | 447.0856 | 448.6846 | 383.6021 | 339.5225 | 399.2338 |
| Med23          | ENSRNOG00000013422  | 16.6179  | 16.78545 | 16.22881 | 15.18832 | 16.41008 | 15.3224  |
| Fuk            | ENSRNOG00000059453  | 9.060899 | 10.20345 | 8.290708 | 8.304885 | 8.646626 | 7.783487 |
| Maea           | ENSRNOG00000005397  | 85.89149 | 95.35571 | 91.9216  | 83.91188 | 86.9497  | 85.08881 |
| Il17rc         | ENSRNOG00000027376  | 14.75661 | 15.6821  | 14.85336 | 14.22064 | 14.98085 | 14.68603 |
| Prim2          | ENSRNOG00000012486  | 21.50807 | 8.171196 | 14.02746 | 18.21475 | 6.138074 | 13.14857 |
| C2cd4a         | ENSRNOG00000034236  | 0.513869 | 0.680956 | 0.34024  | 0.235244 | 0.363154 | 0.265668 |
| Atp6ap1        | ENSRNOG00000054352  | 114.8803 | 146.6124 | 101.623  | 109.4761 | 131.9243 | 95.36306 |
| Caprin1        | ENSRNOG00000009152  | 178.1855 | 151.4288 | 188.9333 | 164.1416 | 133.3316 | 184.6387 |
| Zfp523         | ENSRNOG00000000501  | 5.023447 | 4.300284 | 4.269637 | 4.920087 | 4.232721 | 4.059416 |
| Smug1          | ENSRNOG00000036842  | 8.415426 | 8.482352 | 7.872416 | 7.160646 | 8.096647 | 7.224114 |
| Slc35b1        | ENSRNOG00000004510  | 69.6701  | 69.40776 | 73.53686 | 59.73802 | 49.19746 | 67.04352 |
| AABR07027870.1 | ENSRNOG00000059510  | 21.37132 | 28.38493 | 20.25107 | 19.33829 | 27.70615 | 17.44942 |
| H2afz          | ENSRNOG00000010306  | 526.0792 | 329.0796 | 813.8744 | 493.216  | 199.2975 | 727.4854 |
| Orc1           | ENSRNOG00000008841  | 13.09957 | 3.532188 | 8.544906 | 10.30209 | 2.574651 | 7.262681 |
| Napa           | ENSRNOG00000001494  | 48.1274  | 46.16173 | 41.93993 | 41.30946 | 37.12644 | 39.78541 |
| AC109542.1     | ENSRNOG00000048562  | 54.40557 | 50.79059 | 70.00816 | 51.65748 | 38.99089 | 59.88103 |
| Trmt10c        | ENSRNOG00000039567  | 16.05975 | 12.81076 | 13.99698 | 12.60964 | 10.60231 | 13.10416 |
| Dcst2          | ENSRNOG00000058618  | 3.560695 | 4.403909 | 3.564304 | 2.881398 | 4.056676 | 3.354633 |
| Atcay          | ENSRNOG00000020407  | 0.100078 | 0.102116 | 0.166982 | 0.03207  | 0.069311 | 0.144871 |
| Coq5           | ENSRNOG00000001171  | 13.89728 | 12.06459 | 14.1548  | 13.35253 | 10.05616 | 11.81077 |
| Ptgir          | ENSRNOG00000016756  | 0.316272 | 0.252911 | 0.62678  | 0.279587 | 0.140272 | 0.473619 |
| Utp23          | ENSRNOG00000004387  | 8.362765 | 8.220962 | 9.079962 | 7.509326 | 5.472051 | 7.686727 |
| Wdyhv1         | ENSRNOG00000006700  | 5.868459 | 5.714773 | 4.77287  | 5.307845 | 5.561468 | 4.109227 |
| Ap2a2          | ENSRNOG00000019534  | 81.74966 | 78.4683  | 86.97897 | 78.62014 | 68.51743 | 82.03123 |
| Leng1          | ENSRNOG000000061893 | 3.844414 | 4.547265 | 4.487515 | 3.302587 | 3.159613 | 3.938286 |
| Gpx7           | ENSRNOG00000009751  | 116.5796 | 110.9507 | 149.683  | 108.1395 | 87.0249  | 139.1844 |
| Prrt3          | ENSRNOG00000009863  | 0.185032 | 0.22885  | 0.125779 | 0.144941 | 0.170864 | 0.111604 |
| Mydgf          | ENSRNOG00000046883  | 132.3268 | 130.7208 | 167.4627 | 123.2266 | 91.16073 | 134.2521 |
| Shq1           | ENSRNOG00000005433  | 4.844641 | 3.562119 | 4.125392 | 3.952501 | 3.346448 | 3.49732  |
| Eef1b2         | ENSRNOG00000024186  | 216.1014 | 252.7553 | 272.4629 | 206.9738 | 234.4105 | 239.9441 |
| Evc2           | ENSRNOG00000007025  | 14.33527 | 13.82084 | 12.7481  | 13.57385 | 13.58834 | 12.3589  |
| Fuca1          | ENSRNOG00000009325  | 144.2464 | 172.7956 | 118.501  | 139.852  | 164.2119 | 115.8852 |
| Rab8a          | ENSRNOG00000014621  | 69.28173 | 46.18144 | 51.96017 | 65.58279 | 37.98186 | 49.15559 |
| Apoc3          | ENSRNOG00000047503  | 0.865188 | 0.321022 | 0.588129 | 0.800949 | 0.057067 | 0.313109 |
| Adipor1        | ENSRNOG00000004143  | 125.0897 | 139.0829 | 122.8455 | 115.5141 | 115.4512 | 113.8786 |
| Poc5           | ENSRNOG00000018193  | 3.698145 | 2.527686 | 2.931867 | 3.023339 | 2.286808 | 2.641476 |

|                |                    |          |          |          |          |          |          |
|----------------|--------------------|----------|----------|----------|----------|----------|----------|
| Nucks1         | ENSRNOG00000047287 | 87.98408 | 57.10416 | 125.8916 | 84.76752 | 44.26684 | 117.5073 |
| Tmem161a       | ENSRNOG00000020390 | 22.26648 | 22.86345 | 20.98604 | 18.08989 | 16.21054 | 19.27724 |
| S100a4         | ENSRNOG00000011821 | 3070.405 | 3490.933 | 3918.052 | 2742.587 | 2628.647 | 3570.943 |
| Pi4kb          | ENSRNOG00000021024 | 34.54433 | 36.4705  | 32.98376 | 33.59532 | 32.93168 | 30.89392 |
| LOC100911807   | ENSRNOG00000050492 | 3.517377 | 3.093257 | 3.916792 | 3.025257 | 2.847309 | 3.037671 |
| Wdr61          | ENSRNOG00000012803 | 41.16204 | 39.3379  | 41.41214 | 35.47802 | 30.17408 | 39.0445  |
| Prpf31         | ENSRNOG00000061039 | 25.2254  | 16.61858 | 25.1493  | 23.82518 | 11.88387 | 22.66705 |
| Pgm2           | ENSRNOG00000002185 | 22.14117 | 17.79549 | 19.74791 | 21.34837 | 14.55712 | 17.56633 |
| Ido2           | ENSRNOG00000025365 | 0.776451 | 0.605004 | 0.374264 | 0.099526 | 0.338012 | 0.112398 |
| Rbpjl          | ENSRNOG00000026295 | 1.21687  | 0.913774 | 1.181703 | 0.943925 | 0.802637 | 0.747076 |
| Pola2          | ENSRNOG00000020906 | 19.88566 | 7.029608 | 11.35569 | 18.09168 | 3.988476 | 10.54224 |
| Tmem30a        | ENSRNOG00000010895 | 70.07425 | 75.10826 | 71.85742 | 64.29087 | 64.2999  | 68.7296  |
| Rps5           | ENSRNOG00000019453 | 896.9092 | 884.1134 | 1001.563 | 861.2174 | 725.8695 | 868.4923 |
| Tmem101        | ENSRNOG00000054581 | 24.36818 | 26.67288 | 24.39537 | 23.35554 | 22.29036 | 21.10493 |
| Cul1           | ENSRNOG00000005310 | 64.27753 | 60.32806 | 71.12277 | 59.2818  | 52.43688 | 69.12549 |
|                | ENSRNOG00000031367 | 26.89538 | 22.32824 | 34.37962 | 25.94134 | 18.28673 | 31.50009 |
| Gcsh           | ENSRNOG00000011535 | 37.85026 | 31.59083 | 41.28215 | 35.73469 | 25.79986 | 38.8761  |
| Eif4a1         | ENSRNOG00000030628 | 380.8162 | 292.1861 | 426.6847 | 357.6277 | 213.8784 | 386.0561 |
| AABR07050701.1 | ENSRNOG00000055406 | 4.405767 | 3.250885 | 2.1348   | 2.246107 | 1.684161 | 1.630671 |
| Zfp105         | ENSRNOG00000032919 | 11.96703 | 12.21254 | 11.90886 | 9.742199 | 9.505368 | 11.30151 |
| AC118165.1     | ENSRNOG00000032625 | 4.586155 | 4.667756 | 4.384028 | 3.606073 | 4.442948 | 3.428928 |
| Vcam1          | ENSRNOG00000014333 | 813.9459 | 1023.561 | 909.0956 | 721.0821 | 778.6793 | 811.5798 |
| Pin1           | ENSRNOG00000020474 | 102.2149 | 59.26904 | 84.02483 | 83.25339 | 49.88222 | 78.19142 |
| Tuba1b         | ENSRNOG00000053468 | 575.38   | 306.1135 | 849.9242 | 544.8895 | 178.5447 | 762.6025 |
| Atp5f1a        | ENSRNOG00000017032 | 336.0375 | 346.8242 | 424.4217 | 310.2012 | 256.686  | 376.2806 |
| Kin            | ENSRNOG00000026690 | 9.36809  | 8.499978 | 8.327941 | 8.80376  | 7.419992 | 8.012558 |
| Il1rl2         | ENSRNOG00000014683 | 9.456758 | 6.387816 | 4.837817 | 8.190633 | 4.682489 | 4.446885 |
| Ssx2ip         | ENSRNOG00000015425 | 9.506606 | 6.234327 | 11.1417  | 8.073833 | 4.51975  | 10.7601  |
| Oxnad1         | ENSRNOG00000019760 | 9.516252 | 6.119966 | 7.575389 | 8.671444 | 3.989057 | 6.767443 |
|                | ENSRNOG00000006796 | 45.45198 | 33.95915 | 43.12207 | 36.73241 | 27.51427 | 41.12235 |
| Pla2g15        | ENSRNOG00000019859 | 15.46303 | 13.56452 | 9.100495 | 14.54634 | 13.32354 | 8.558483 |
| Tmem184c       | ENSRNOG00000012860 | 11.44892 | 22.51773 | 14.99618 | 10.31528 | 21.70265 | 12.52007 |
| Pdk3           | ENSRNOG00000012513 | 16.47684 | 9.08363  | 16.12532 | 16.01149 | 7.919511 | 14.2723  |
| Zfp708         | ENSRNOG00000049662 | 2.6031   | 3.82499  | 3.053578 | 2.313038 | 3.715061 | 2.93871  |
| Chac2          | ENSRNOG00000001531 | 5.666621 | 5.660746 | 8.94695  | 4.656109 | 5.113599 | 7.042355 |
| LOC680121      | ENSRNOG00000009920 | 708.8921 | 773.2795 | 613.1417 | 631.6412 | 631.525  | 573.3719 |
| Emilin1        | ENSRNOG00000008246 | 260.5633 | 231.622  | 368.862  | 252.0827 | 194.2078 | 340.6265 |
| Pqlc3          | ENSRNOG00000005126 | 135.3309 | 168.0564 | 105.6457 | 119.0197 | 141.6489 | 98.95197 |
| Rps18          | ENSRNOG00000033152 | 330.1138 | 387.51   | 367.1382 | 304.888  | 313.3811 | 334.4581 |
| Crot           | ENSRNOG00000006779 | 23.45967 | 19.21093 | 16.92776 | 20.83625 | 18.58207 | 15.17306 |
| LOC100360117   | ENSRNOG00000048456 | 102.3141 | 124.8783 | 110.9402 | 99.85807 | 115.3877 | 99.76625 |
| Asl            | ENSRNOG00000000903 | 45.46196 | 51.01006 | 40.81838 | 39.27952 | 49.63105 | 36.02319 |
| Tldc1          | ENSRNOG00000016224 | 7.542985 | 6.663751 | 5.583386 | 5.961758 | 6.232773 | 4.699629 |
| Ndufs8         | ENSRNOG00000017446 | 61.09266 | 54.38838 | 71.19516 | 56.57093 | 38.83927 | 63.13038 |
| Fam103a1       | ENSRNOG00000019426 | 21.59907 | 16.6889  | 23.14568 | 18.7108  | 11.50683 | 21.73198 |
| Rpn1           | ENSRNOG00000046345 | 253.2239 | 280.4698 | 309.3023 | 227.1218 | 207.0514 | 278.5975 |
| Abcg311        | ENSRNOG00000030216 | 5.774791 | 7.262976 | 5.30477  | 5.084833 | 5.932259 | 4.918749 |
| Sin3b          | ENSRNOG00000048622 | 97.12395 | 86.08257 | 100.7906 | 86.65447 | 65.37564 | 94.64817 |
| Ctsl           | ENSRNOG00000018566 | 440.0083 | 572.2828 | 318.343  | 409.0977 | 497.384  | 291.401  |
| Psmb4          | ENSRNOG00000020979 | 416.2629 | 348.4752 | 408.5929 | 386.5576 | 266.0763 | 374.6673 |
| Smcr8          | ENSRNOG00000005165 | 16.16897 | 20.47089 | 15.3728  | 14.62224 | 20.10478 | 14.33223 |
| Cnpy2          | ENSRNOG00000003549 | 101.2472 | 117.1617 | 102.4316 | 98.30336 | 105.1236 | 88.91352 |
| Nuak2          | ENSRNOG00000000034 | 15.80329 | 15.66483 | 22.99046 | 14.73223 | 13.82649 | 22.51035 |
| Sdf4           | ENSRNOG00000019981 | 200.908  | 201.2696 | 187.1754 | 173.6124 | 165.5295 | 179.2473 |

|                |                    |          |          |          |          |          |          |
|----------------|--------------------|----------|----------|----------|----------|----------|----------|
| 9-Sep          | ENSRNOG00000002807 | 91.72058 | 92.9234  | 105.0744 | 89.31987 | 85.94218 | 94.80694 |
| Kdelr3         | ENSRNOG00000013577 | 144.8414 | 152.4437 | 214.65   | 123.8266 | 112.4803 | 203.2924 |
| Cfl1           | ENSRNOG00000020660 | 692.3315 | 695.2944 | 813.2441 | 637.5343 | 504.9793 | 714.6177 |
| Hnrnpf         | ENSRNOG00000014562 | 260.8593 | 204.9917 | 253.7938 | 239.4576 | 161.9361 | 240.9196 |
| Dctd           | ENSRNOG00000013215 | 13.34142 | 5.683823 | 9.457077 | 11.62324 | 5.241103 | 7.414377 |
| Cct3           | ENSRNOG00000019090 | 124.6006 | 96.05909 | 124.1388 | 114.1037 | 71.04977 | 115.3577 |
| N4bp212        | ENSRNOG00000001108 | 29.6909  | 25.67968 | 27.78554 | 29.18677 | 23.86781 | 26.81123 |
| Mtmr6          | ENSRNOG00000012918 | 18.57362 | 25.78588 | 24.49939 | 18.10223 | 24.45464 | 22.50103 |
| Tapt1          | ENSRNOG00000003174 | 11.87871 | 10.44277 | 12.55226 | 9.767823 | 9.919381 | 11.24557 |
| Hdhd2          | ENSRNOG00000043171 | 18.83573 | 16.96163 | 23.72399 | 16.51069 | 12.52472 | 22.46378 |
| Ppp1r15a       | ENSRNOG00000020938 | 24.1742  | 23.99303 | 14.25341 | 22.97155 | 21.16971 | 13.28009 |
| Nppa           | ENSRNOG00000008176 | 0.126998 | 0.157073 | 0.078481 | 0        | 0.12565  | 0        |
| Zbtb49         | ENSRNOG00000005633 | 3.028157 | 4.044881 | 3.518079 | 2.889577 | 3.488695 | 3.178056 |
| Adgrg6         | ENSRNOG00000011411 | 15.64411 | 8.261863 | 18.28929 | 14.03671 | 7.755291 | 17.53874 |
| Rps15          | ENSRNOG00000024603 | 720.4402 | 766.1539 | 738.5036 | 685.487  | 613.9273 | 633.473  |
| Lhx3           | ENSRNOG00000018427 | 0.173705 | 0.05371  | 0.107345 | 0.154622 | 0        | 0.026193 |
| Tipin1         | ENSRNOG00000037221 | 11.15637 | 5.174372 | 8.095914 | 10.28263 | 3.153702 | 7.411618 |
| Supv311        | ENSRNOG00000000392 | 9.801111 | 10.29034 | 9.623613 | 9.399106 | 8.533434 | 8.407689 |
| Rab13          | ENSRNOG00000016733 | 49.73677 | 50.71068 | 58.77274 | 47.25795 | 45.75868 | 49.68372 |
| RGD1559786     | ENSRNOG00000012724 | 25.56251 | 19.38938 | 22.32212 | 23.47847 | 14.2846  | 20.4955  |
| Haus7          | ENSRNOG00000055648 | 32.77739 | 21.28849 | 33.05128 | 27.71024 | 14.8565  | 31.65953 |
| Sec11c         | ENSRNOG00000017036 | 32.87862 | 31.22772 | 34.16354 | 29.24207 | 24.79757 | 32.46616 |
| LOC100360316   | ENSRNOG00000051615 | 120.8249 | 57.67272 | 163.1023 | 116.5322 | 41.90807 | 154.5103 |
| Mob1a          | ENSRNOG00000059474 | 61.70676 | 56.64669 | 65.9309  | 58.9207  | 51.04941 | 64.28133 |
| Ppia           | ENSRNOG00000027864 | 554.4163 | 524.6546 | 713.1986 | 510.9657 | 354.1469 | 613.0281 |
| Eci2           | ENSRNOG00000029549 | 49.3674  | 49.23762 | 44.76565 | 45.33878 | 39.39768 | 41.2688  |
| Chchd3         | ENSRNOG00000013211 | 61.84125 | 64.45109 | 65.70194 | 54.08322 | 56.04703 | 63.90139 |
| Eif3m          | ENSRNOG00000012738 | 150.3411 | 175.0931 | 175.6135 | 139.687  | 139.279  | 157.9883 |
| Adcy10         | ENSRNOG00000053410 | 0.045708 | 0.035333 | 0.070616 | 0.024412 | 0.022611 | 0.027569 |
| Thoc3          | ENSRNOG00000000104 | 46.31949 | 31.09256 | 34.60904 | 41.11415 | 20.93784 | 31.7075  |
| Lbr            | ENSRNOG00000052574 | 41.72127 | 32.68086 | 47.84729 | 37.28872 | 21.99523 | 44.11113 |
| Fam32a         | ENSRNOG00000039528 | 47.40674 | 31.51535 | 31.85948 | 46.31832 | 27.06262 | 29.12156 |
| Fbxo3          | ENSRNOG00000009549 | 19.54131 | 17.7134  | 18.97839 | 16.51289 | 16.99661 | 17.03303 |
| AABR07028349.1 | ENSRNOG00000021584 | 33.03743 | 22.35059 | 34.14697 | 28.82946 | 19.43927 | 33.1969  |
| Gorasp2        | ENSRNOG00000055853 | 34.21028 | 33.74448 | 40.04046 | 33.23749 | 30.56105 | 35.63298 |
| Nkapd1         | ENSRNOG00000009958 | 7.030247 | 7.380717 | 7.567514 | 6.764401 | 6.837006 | 7.405867 |
| Smu1           | ENSRNOG00000007671 | 57.10858 | 54.18142 | 61.24646 | 53.96411 | 44.67064 | 57.0877  |

**Supplementary Table 5. The 1551 down-regulated genes under siPde4d.**

| Symbol             | Gene id            | NC1A     | NC2A     | NC3A     | Si1A     | Si2A     | Si3A     |
|--------------------|--------------------|----------|----------|----------|----------|----------|----------|
| Plscr3             | ENSRNOG00000027914 | 18.899   | 17.44156 | 20.12305 | 15.32208 | 13.88181 | 16.51773 |
| Vom1r90            | ENSRNOG00000058136 | 0.029176 | 0.029414 | 0.054675 | 0        | 0        | 0.02616  |
| RGD1302996         | ENSRNOG00000000812 | 0.299389 | 0.408365 | 0.363034 | 0.113568 | 0.225523 | 0.1737   |
| B4galt4            | ENSRNOG00000003114 | 9.657043 | 9.550296 | 10.85066 | 7.746674 | 7.635503 | 8.842369 |
| Akr1d1             | ENSRNOG00000013004 | 0.026459 | 0.026675 | 0.024792 | 0        | 0        | 0        |
| AABR07072272<br>.1 | ENSRNOG00000029560 | 0.138932 | 0.140067 | 0.130179 | 0        | 0        | 0        |
| LOC100911857       | ENSRNOG00000057016 | 0.072576 | 0.073169 | 0.068004 | 0        | 0        | 0        |
| Olr1734            | ENSRNOG00000058776 | 0.044385 | 0.044748 | 0.041589 | 0        | 0        | 0        |
| Fyco1              | ENSRNOG00000006336 | 7.741594 | 10.84845 | 10.11378 | 5.184005 | 8.274068 | 7.354447 |
| Snx13              | ENSRNOG00000004186 | 12.29417 | 15.92272 | 15.20389 | 10.33574 | 13.82296 | 13.06835 |
| Tyk2               | ENSRNOG00000032948 | 7.122293 | 8.733488 | 7.703378 | 5.700295 | 7.19547  | 6.161123 |
| Utp15              | ENSRNOG00000016591 | 11.70693 | 11.48358 | 10.73529 | 10.64678 | 10.51022 | 9.750349 |
| Ddx5               | ENSRNOG00000030680 | 294.2642 | 324.4571 | 288.164  | 273.1875 | 305.1718 | 266.9    |
| Mif4gd             | ENSRNOG00000003837 | 13.64854 | 15.40303 | 13.83843 | 9.508344 | 11.05568 | 9.954678 |
| RGD1308106         | ENSRNOG00000025061 | 7.883753 | 7.806861 | 7.879513 | 7.117548 | 7.002889 | 7.021784 |
| Irak1bp1           | ENSRNOG00000008984 | 5.474893 | 5.053679 | 6.928765 | 4.290397 | 3.967254 | 5.865326 |
| Parl               | ENSRNOG00000023271 | 21.77136 | 21.09034 | 19.18752 | 20.49259 | 19.91411 | 18.04997 |
| Gltp               | ENSRNOG00000001192 | 17.70183 | 12.70924 | 11.56333 | 16.79656 | 11.8707  | 10.61321 |
| Glrx               | ENSRNOG00000012183 | 18.4681  | 35.31067 | 23.38191 | 9.654607 | 25.63559 | 14.81459 |
| AABR07040855<br>.1 | ENSRNOG00000051669 | 8.590066 | 12.34982 | 9.572899 | 7.398406 | 11.01878 | 8.385849 |
| Uros               | ENSRNOG00000017810 | 5.140485 | 4.258039 | 4.113648 | 4.7868   | 3.863236 | 3.762086 |
| Ciita              | ENSRNOG00000002659 | 1.103017 | 1.504038 | 0.914556 | 0.752967 | 1.103281 | 0.53364  |
| Rtn4               | ENSRNOG00000004621 | 53.72901 | 52.61662 | 45.12581 | 39.01718 | 39.2846  | 32.17738 |
| Med4               | ENSRNOG00000017170 | 14.86373 | 13.14956 | 11.29069 | 13.20507 | 11.65783 | 9.824917 |
| Gdpd2              | ENSRNOG00000002800 | 0.132662 | 0.074303 | 0.082869 | 0.067896 | 0.013483 | 0.026433 |
| Ankdd1a            | ENSRNOG00000015554 | 0.910625 | 1.350096 | 1.079113 | 0.271409 | 0.710451 | 0.360223 |
| Heatr3             | ENSRNOG00000015459 | 9.380681 | 8.558483 | 7.675817 | 8.094275 | 7.363107 | 6.302547 |
| Tuba4a             | ENSRNOG00000003597 | 24.69258 | 19.13541 | 17.6429  | 21.66184 | 16.0895  | 14.95901 |
| Prdm15             | ENSRNOG00000001620 | 2.371884 | 2.411357 | 2.533712 | 2.129981 | 2.187777 | 2.323321 |
| Cxcl12             | ENSRNOG00000013589 | 96.73504 | 93.96181 | 106.391  | 67.25882 | 67.18704 | 80.68032 |
| Snape5             | ENSRNOG00000010156 | 23.91433 | 25.40196 | 22.71646 | 19.23053 | 20.96982 | 17.60067 |
| Ube2i              | ENSRNOG00000017907 | 117.8956 | 110.9965 | 99.89375 | 102.6088 | 96.92858 | 83.58102 |
| Dbn1d2             | ENSRNOG00000014571 | 32.81328 | 27.4287  | 23.69409 | 28.53017 | 23.74967 | 19.73824 |
| Cyp2s1             | ENSRNOG00000020743 | 0.515453 | 0.637007 | 0.545297 | 0.229768 | 0.380226 | 0.298179 |
| Shkbp1             | ENSRNOG00000020882 | 5.888255 | 6.04112  | 6.766769 | 3.254686 | 3.786003 | 4.301371 |
| Bst2               | ENSRNOG00000059900 | 78.48166 | 201.2071 | 171.472  | 59.15033 | 178.9644 | 151.7573 |
| Zbtb17             | ENSRNOG00000010436 | 11.72719 | 14.06968 | 13.28373 | 9.784318 | 12.12906 | 11.06778 |
| Faap20             | ENSRNOG00000036876 | 9.422287 | 10.99549 | 10.60731 | 5.023681 | 6.345488 | 5.47755  |
| Tmem222            | ENSRNOG00000008564 | 21.19079 | 20.8066  | 18.58952 | 18.5598  | 18.17514 | 16.30194 |
| Ypel4              | ENSRNOG00000060130 | 4.784611 | 5.793684 | 7.35823  | 3.737014 | 4.602408 | 6.132026 |
| Arhgdia            | ENSRNOG00000036688 | 142.6972 | 128.9135 | 113.1163 | 129.0561 | 115.0657 | 97.32848 |
| RGD1311946         | ENSRNOG00000025245 | 16.79731 | 12.92919 | 11.99714 | 15.66394 | 11.5986  | 10.79754 |
| Anp32a             | ENSRNOG00000058484 | 35.33628 | 30.83011 | 28.6145  | 28.28698 | 23.04887 | 20.27478 |
| Cnot2              | ENSRNOG00000004909 | 39.20535 | 40.74809 | 37.3454  | 36.65524 | 37.77097 | 34.73039 |
| Pip5k1a            | ENSRNOG00000021068 | 21.33365 | 20.21213 | 20.82785 | 16.27524 | 15.94064 | 16.32659 |
| Agpat1             | ENSRNOG00000000437 | 13.30501 | 12.83171 | 12.33795 | 10.39571 | 9.466952 | 9.452674 |
| Arrb2              | ENSRNOG00000019308 | 3.922571 | 4.187242 | 2.95476  | 2.999538 | 3.353442 | 2.183848 |
| Kxd1               | ENSRNOG00000019971 | 25.53795 | 29.00659 | 24.30768 | 18.61809 | 20.63692 | 16.60547 |
| Adamts16           | ENSRNOG00000016812 | 0.011947 | 0.012045 | 0.022389 | 0.011006 | 0.010928 | 0.021425 |
| Csnk1a1            | ENSRNOG00000017106 | 139.177  | 161.1197 | 159.4848 | 117.8513 | 142.7218 | 137.2474 |
| Tulp3              | ENSRNOG00000005767 | 25.18702 | 27.8611  | 33.83736 | 12.0386  | 15.03234 | 18.52252 |
| Rmdn3              | ENSRNOG00000011690 | 20.98582 | 33.22132 | 25.27913 | 15.55437 | 27.045   | 20.19144 |
| Atxn713b           | ENSRNOG00000059744 | 30.98935 | 35.07096 | 36.2232  | 20.92106 | 24.30286 | 23.9684  |

|              |                    |          |          |          |          |          |          |
|--------------|--------------------|----------|----------|----------|----------|----------|----------|
| Atp5md       | ENSRNOG00000042869 | 53.99404 | 50.99715 | 46.86434 | 38.74585 | 33.40186 | 32.36051 |
| Cluap1       | ENSRNOG00000007117 | 19.24184 | 21.69307 | 19.16801 | 17.2582  | 20.04543 | 17.19363 |
| Rundc3b      | ENSRNOG00000008463 | 0.023334 | 0.0941   | 0.05466  | 0        | 0.074703 | 0.031384 |
| Ddx52        | ENSRNOG00000002612 | 19.2205  | 19.34913 | 18.43172 | 17.27856 | 17.41341 | 16.12287 |
| Slc25a22     | ENSRNOG00000049944 | 6.422027 | 6.529054 | 6.642817 | 4.952331 | 5.049157 | 5.418591 |
| Ttc1         | ENSRNOG00000003980 | 31.77816 | 36.74199 | 29.8903  | 26.52188 | 30.43415 | 24.5833  |
| Zc3h4        | ENSRNOG00000015229 | 5.008859 | 4.973958 | 4.911736 | 3.595864 | 3.226359 | 3.344766 |
| Mk1          | ENSRNOG00000019657 | 22.91876 | 25.19689 | 31.33935 | 20.67644 | 22.90888 | 29.46963 |
| Smurf1       | ENSRNOG00000000999 | 13.74728 | 11.31725 | 10.62892 | 12.3848  | 10.19849 | 9.475448 |
| Eloc         | ENSRNOG00000031730 | 17.69977 | 14.79028 | 12.35366 | 14.6207  | 11.51937 | 9.720389 |
| Zmynd15      | ENSRNOG00000019477 | 4.970717 | 8.367536 | 5.298486 | 2.688709 | 6.534983 | 3.271161 |
| Zhx3         | ENSRNOG00000027988 | 5.878872 | 4.616615 | 5.645052 | 5.124901 | 3.710825 | 4.715807 |
| RT1-A1       | ENSRNOG00000038999 | 85.56713 | 123.7141 | 123.2296 | 71.66414 | 106.2918 | 107.3202 |
| Tm4sf19      | ENSRNOG00000001757 | 1.885549 | 2.205106 | 2.137769 | 1.094333 | 1.224536 | 1.183465 |
| Camk2b       | ENSRNOG00000052080 | 0.17655  | 0.198932 | 0.107041 | 0.10524  | 0.123492 | 0.018624 |
| Cuta         | ENSRNOG00000000481 | 24.08779 | 21.74285 | 22.44177 | 20.90305 | 19.15035 | 19.26387 |
| Naa50        | ENSRNOG00000039017 | 24.20009 | 21.25685 | 17.03444 | 20.8674  | 18.43939 | 13.49912 |
| Chchd6       | ENSRNOG00000060248 | 16.52299 | 20.13692 | 17.42197 | 12.97762 | 15.819   | 13.03157 |
| Bap1         | ENSRNOG00000019097 | 20.61591 | 20.2315  | 20.90217 | 15.02603 | 15.58095 | 16.33008 |
| Rab24        | ENSRNOG00000016539 | 13.54396 | 9.730107 | 9.002051 | 12.16712 | 8.493292 | 7.446538 |
| AABR07048308 | ENSRNOG00000027547 | 0.890862 | 0.561338 | 0.417367 | 0.615521 | 0.305574 | 0.199696 |
| .1           |                    |          |          |          |          |          |          |
| Tomm20       | ENSRNOG00000019980 | 173.0895 | 181.752  | 164.611  | 131.1936 | 128.6278 | 117.0402 |
| Prpf31       | ENSRNOG00000061039 | 23.35636 | 20.64737 | 17.65454 | 20.2254  | 18.00029 | 14.29888 |
| Tgm1         | ENSRNOG00000020136 | 0.764599 | 1.097476 | 1.347853 | 0.238772 | 0.663812 | 0.801771 |
| Iqcd         | ENSRNOG00000001378 | 0.700727 | 0.578006 | 0.626734 | 0.264083 | 0.233073 | 0.257033 |
| RGD1359508   | ENSRNOG00000038330 | 5.076269 | 3.954618 | 4.215937 | 4.570163 | 3.552772 | 3.792999 |
| Klhl7        | ENSRNOG00000010453 | 8.990139 | 10.63986 | 10.66191 | 6.988394 | 8.170249 | 8.658049 |
| Klf16        | ENSRNOG00000033694 | 6.973134 | 7.336499 | 6.343953 | 6.050605 | 6.285613 | 5.525737 |
| AABR07068214 | ENSRNOG00000061442 | 62.77202 | 145.9563 | 135.8592 | 35.83701 | 123.7299 | 107.4154 |
| .1           |                    |          |          |          |          |          |          |
| Gckr         | ENSRNOG00000048874 | 0.415642 | 0.122219 | 0.129818 | 0.350996 | 0.047523 | 0.046585 |
| Rfx1         | ENSRNOG00000006049 | 2.843159 | 2.951317 | 2.890964 | 2.3476   | 2.330924 | 2.266043 |
| Cacnb2       | ENSRNOG00000018378 | 0.364697 | 0.464433 | 0.44963  | 0.229876 | 0.333585 | 0.344213 |
| Med27        | ENSRNOG00000013933 | 19.4699  | 22.80062 | 20.89618 | 14.61961 | 18.70423 | 17.11278 |
| Hikeshi      | ENSRNOG00000017383 | 17.69706 | 17.64277 | 12.83262 | 13.55137 | 13.12002 | 9.348946 |
| Wdr4         | ENSRNOG00000001181 | 6.390527 | 7.432986 | 6.374212 | 5.876018 | 6.765988 | 5.751765 |
| Jsrp1        | ENSRNOG00000032951 | 0.076199 | 0.076821 | 0.095197 | 0        | 0        | 0        |
| Msantd4      | ENSRNOG00000022245 | 19.58828 | 24.61384 | 22.03616 | 17.42603 | 21.79865 | 19.51967 |
| Polrmt       | ENSRNOG00000024879 | 5.246956 | 4.465129 | 5.35436  | 4.801393 | 4.008369 | 4.998031 |
| Ccdc58       | ENSRNOG00000031653 | 14.82779 | 16.32772 | 12.61213 | 9.813917 | 10.30384 | 7.906147 |
| Tle4         | ENSRNOG00000013239 | 0.866426 | 1.013998 | 1.021893 | 0.580497 | 0.775887 | 0.798605 |
| Mt-nd2       | ENSRNOG00000031033 | 8.6769   | 4.671149 | 7.143542 | 8.187497 | 4.12246  | 6.722593 |
| Rrp12        | ENSRNOG00000048495 | 11.0439  | 11.79265 | 10.31984 | 8.609522 | 9.145831 | 8.28957  |
| Med10        | ENSRNOG00000017150 | 33.76048 | 37.81811 | 31.50325 | 26.40846 | 31.30408 | 25.86953 |
| Bcl2l12      | ENSRNOG00000020486 | 17.22609 | 13.8726  | 13.59606 | 10.57954 | 7.901952 | 8.511342 |
| Chchd3       | ENSRNOG00000013211 | 60.20403 | 67.79516 | 62.19107 | 55.03327 | 61.13662 | 56.64275 |
| Nop9         | ENSRNOG00000020321 | 19.83191 | 16.98792 | 16.52383 | 10.96916 | 10.02999 | 9.339579 |
| Pcsk6        | ENSRNOG00000011526 | 0.474774 | 0.159551 | 0.563491 | 0.40822  | 0.096505 | 0.482463 |
| Zfp746       | ENSRNOG00000007064 | 14.15706 | 13.26861 | 13.06513 | 12.16817 | 11.13819 | 11.43933 |
| Dohh         | ENSRNOG00000004259 | 67.3687  | 80.38747 | 62.74425 | 60.72843 | 74.20564 | 54.74425 |
| Phrf1        | ENSRNOG00000017299 | 12.09321 | 11.46131 | 11.19394 | 10.61556 | 9.743126 | 9.886746 |
| Elmod2       | ENSRNOG00000028176 | 2.036796 | 2.488173 | 2.69077  | 1.614356 | 2.156766 | 2.352773 |
| Xylb         | ENSRNOG00000014168 | 4.293591 | 3.846257 | 5.852849 | 3.919672 | 3.536951 | 5.566001 |
| Ets2         | ENSRNOG00000001647 | 11.04383 | 15.83428 | 12.45847 | 9.002634 | 13.14773 | 9.913226 |
| Bhlhe40      | ENSRNOG00000007152 | 31.73597 | 44.69678 | 43.0428  | 28.06553 | 41.93404 | 39.80182 |
| Lin37        | ENSRNOG00000020929 | 23.98666 | 35.6329  | 28.96737 | 18.58282 | 29.20042 | 21.78269 |



|              |                    |          |          |          |          |          |          |
|--------------|--------------------|----------|----------|----------|----------|----------|----------|
| Crocc        | ENSRNOG00000008334 | 2.75235  | 2.216186 | 2.698759 | 2.266303 | 1.576257 | 2.16758  |
| Peg12        | ENSRNOG00000024429 | 4.285605 | 4.032576 | 4.047088 | 2.957172 | 2.951539 | 2.606979 |
| Fam222b      | ENSRNOG00000029570 | 1.551442 | 1.716184 | 1.726262 | 1.081859 | 1.320545 | 1.371768 |
| Syf2         | ENSRNOG00000060597 | 44.64706 | 59.74007 | 50.79223 | 37.99123 | 54.51848 | 43.9084  |
| Camk2a       | ENSRNOG00000018712 | 0.433589 | 0.466273 | 0.56878  | 0.026629 | 0.1322   | 0.259183 |
| Mtfmt        | ENSRNOG00000014602 | 9.763124 | 11.46774 | 9.844996 | 8.794279 | 10.74466 | 8.976358 |
| Aatf         | ENSRNOG00000002778 | 15.70499 | 18.34887 | 15.63236 | 13.43136 | 15.3274  | 12.74378 |
| Prpf19       | ENSRNOG00000020897 | 50.47097 | 55.18272 | 44.71122 | 29.15995 | 29.65344 | 25.5229  |
| RGD1561157   | ENSRNOG00000042258 | 21.04421 | 48.34325 | 36.10124 | 15.81801 | 42.04133 | 31.35469 |
| Sap130       | ENSRNOG00000016773 | 3.748442 | 3.779066 | 3.442822 | 2.916688 | 2.721631 | 2.335619 |
| Plrg1        | ENSRNOG0000006655  | 56.85337 | 56.50079 | 51.59154 | 52.23967 | 50.45339 | 45.58217 |
| Rmt1         | ENSRNOG00000013373 | 0.059461 | 0.07993  | 0.055715 | 0.00913  | 0.01813  | 0.008886 |
| Pgz          | ENSRNOG00000047384 | 0.208027 | 0.209726 | 0.19492  | 0.071866 | 0.09514  | 0.093263 |
| Zfp770       | ENSRNOG00000043037 | 4.731689 | 4.660683 | 3.788071 | 3.99158  | 4.112469 | 3.153529 |
| Sdhaf3       | ENSRNOG00000011283 | 6.607444 | 7.007473 | 5.306697 | 5.138394 | 5.023403 | 3.616263 |
| Rars         | ENSRNOG00000007739 | 84.93713 | 87.16462 | 73.94231 | 73.43724 | 78.68792 | 63.66182 |
| Zbtb2        | ENSRNOG00000019544 | 4.407041 | 4.218081 | 4.024837 | 3.340447 | 3.431528 | 3.05119  |
| Nrbf2        | ENSRNOG00000000641 | 6.746264 | 7.504105 | 7.230917 | 5.320511 | 5.578732 | 5.602569 |
| Cwc15        | ENSRNOG00000008490 | 35.22514 | 38.98239 | 30.51136 | 27.24663 | 31.06205 | 24.48152 |
| Gabpb2       | ENSRNOG00000021105 | 10.35332 | 11.39771 | 9.896149 | 7.893399 | 8.762569 | 7.949429 |
| Ccl7         | ENSRNOG00000000239 | 889.0187 | 1280.343 | 919.12   | 560.3537 | 1016.015 | 671.3324 |
| Zcchc6       | ENSRNOG00000016629 | 16.50322 | 24.33398 | 25.16722 | 15.50344 | 23.13962 | 23.79879 |
| RGD1562747   | ENSRNOG00000037352 | 4.538552 | 5.565344 | 4.359252 | 3.276709 | 4.606862 | 3.367828 |
| Ppm1b        | ENSRNOG00000030667 | 9.189285 | 10.23389 | 9.475644 | 9.042063 | 10.032   | 9.300239 |
| Sfxn1        | ENSRNOG00000018279 | 43.3554  | 56.17287 | 49.7758  | 33.11819 | 42.71049 | 39.29259 |
| Ift74        | ENSRNOG00000008075 | 10.25579 | 12.05587 | 9.415108 | 8.9125   | 10.21645 | 7.706587 |
| Sf3b2        | ENSRNOG00000020412 | 54.40585 | 53.29022 | 52.17364 | 47.64465 | 48.33677 | 45.78847 |
| Dnaaf4       | ENSRNOG00000056654 | 0.4609   | 0.50892  | 0.452427 | 0.323504 | 0.321206 | 0.275509 |
| Nek7         | ENSRNOG00000000657 | 33.26987 | 45.72408 | 46.77921 | 21.86106 | 31.0498  | 31.18553 |
| Agrn         | ENSRNOG00000020205 | 8.636298 | 16.33029 | 18.83279 | 4.944833 | 11.4065  | 13.86133 |
| Slc41a1      | ENSRNOG00000042320 | 3.416383 | 4.563927 | 5.238224 | 1.760059 | 2.350163 | 2.995765 |
| Slc9a1       | ENSRNOG00000007982 | 3.358564 | 3.457371 | 3.640746 | 2.673766 | 2.510884 | 2.856277 |
| Nlgn3        | ENSRNOG00000003812 | 0.033054 | 0.044432 | 0.123886 | 0        | 0        | 0.079034 |
| Gja1         | ENSRNOG00000000805 | 162.4165 | 143.8064 | 173.5326 | 120.9241 | 87.60057 | 117.5452 |
| Spsb2        | ENSRNOG00000047113 | 4.634624 | 5.63552  | 5.237668 | 3.585149 | 4.30398  | 3.774936 |
| Wdr62        | ENSRNOG00000049708 | 6.426941 | 5.522751 | 3.976956 | 4.665063 | 4.229492 | 2.575798 |
| Nsmce4a      | ENSRNOG00000020452 | 50.57971 | 33.2678  | 29.63089 | 46.83844 | 28.87208 | 24.42027 |
| Psmc9        | ENSRNOG00000001339 | 46.33792 | 42.37994 | 38.19723 | 39.0558  | 37.16881 | 31.58508 |
| Ik           | ENSRNOG00000017251 | 46.09747 | 49.87428 | 39.88128 | 41.65886 | 46.52097 | 36.51864 |
| Crtc2        | ENSRNOG00000056337 | 3.441701 | 4.065131 | 3.288092 | 2.238086 | 2.82403  | 2.390119 |
| Ei24         | ENSRNOG00000030391 | 28.06531 | 26.97755 | 27.39873 | 15.34439 | 17.14728 | 17.99978 |
| Notch1       | ENSRNOG00000019322 | 1.658477 | 1.773923 | 1.915579 | 0.960726 | 1.15981  | 1.421153 |
| Gosr1        | ENSRNOG00000003971 | 16.57416 | 17.4127  | 16.61586 | 14.5412  | 15.82635 | 15.12779 |
| Timm9        | ENSRNOG00000008222 | 16.68578 | 15.69079 | 15.26879 | 14.69737 | 13.96819 | 13.86753 |
| AABR07066944 | ENSRNOG00000056226 | 9.331942 | 5.731421 | 2.713652 | 7.954629 | 4.022647 | 1.490747 |
| .1           |                    |          |          |          |          |          |          |
| Gmfb         | ENSRNOG00000047250 | 75.60899 | 95.64384 | 75.66957 | 65.34983 | 81.10703 | 63.34873 |
| Evi5         | ENSRNOG00000002039 | 10.81121 | 10.3917  | 10.88382 | 9.329411 | 9.070588 | 9.842096 |
| Inip         | ENSRNOG00000017047 | 24.79732 | 25.24743 | 18.40395 | 20.35622 | 22.06436 | 14.85958 |
| Daxx         | ENSRNOG00000000477 | 21.57226 | 38.03587 | 28.15557 | 15.37647 | 32.05904 | 20.03647 |
| Larp4b       | ENSRNOG00000015888 | 31.89071 | 30.95782 | 31.85148 | 25.91202 | 26.76225 | 26.59849 |
| Tmem167a     | ENSRNOG00000016686 | 187.0083 | 203.0389 | 180.3518 | 169.1059 | 185.8812 | 156.9612 |
| Ndufb3       | ENSRNOG00000011825 | 62.537   | 62.48942 | 53.00251 | 55.28652 | 57.14585 | 47.51885 |
| Rab1a        | ENSRNOG00000004992 | 110.3707 | 114.0733 | 116.1437 | 93.86797 | 97.58866 | 94.02343 |
| Spryd4       | ENSRNOG00000003127 | 10.77804 | 15.22448 | 13.01215 | 8.510683 | 12.07949 | 10.56674 |
| Arhgef17     | ENSRNOG00000053502 | 30.40261 | 28.67766 | 32.28806 | 24.93738 | 24.54618 | 28.27133 |
| Hmgn1        | ENSRNOG00000050978 | 86.32406 | 80.20645 | 71.72579 | 59.43586 | 56.4     | 52.99464 |

|              |                    |          |          |          |          |          |          |
|--------------|--------------------|----------|----------|----------|----------|----------|----------|
| Cnksr1       | ENSRNOG00000022838 | 2.219575 | 5.594271 | 3.707943 | 1.372138 | 4.59473  | 3.011435 |
| Chmp6        | ENSRNOG00000004014 | 28.6233  | 30.83948 | 24.10897 | 23.41884 | 25.07671 | 20.09869 |
| Usp10        | ENSRNOG00000016509 | 16.83112 | 16.22379 | 13.16531 | 14.23085 | 13.36799 | 11.1771  |
| Dnttip2      | ENSRNOG00000025025 | 14.19033 | 13.88805 | 12.03305 | 10.68423 | 10.70319 | 9.593107 |
| Cited2       | ENSRNOG00000056940 | 18.92904 | 18.47247 | 14.70672 | 17.12785 | 15.87654 | 12.362   |
| Inpp5b       | ENSRNOG00000048506 | 4.940494 | 6.359281 | 6.416317 | 3.82103  | 4.813298 | 4.831636 |
| Rap2a        | ENSRNOG00000051564 | 12.79304 | 12.60413 | 13.32581 | 8.750708 | 9.813945 | 9.857525 |
| Sf3a1        | ENSRNOG00000005218 | 11.23954 | 10.03912 | 9.477447 | 8.554934 | 7.385536 | 7.575982 |
| Pwp1         | ENSRNOG00000005350 | 16.13463 | 15.83725 | 14.06101 | 12.45188 | 12.88912 | 11.48962 |
| AABR07021591 | ENSRNOG00000029459 | 7.344234 | 10.04136 | 8.012725 | 4.634095 | 7.177837 | 4.239757 |
| .1           |                    |          |          |          |          |          |          |
| Tbc1d8       | ENSRNOG00000013583 | 1.142652 | 0.92159  | 0.996538 | 0.793539 | 0.514548 | 0.717186 |
| Kcnt1        | ENSRNOG00000017283 | 2.31043  | 5.668732 | 3.573076 | 1.708273 | 5.170488 | 3.157728 |
| Lsm1         | ENSRNOG00000015375 | 30.51934 | 37.33605 | 38.91552 | 26.05993 | 33.61092 | 35.85196 |
| Ppp1r37      | ENSRNOG00000017692 | 23.53058 | 23.7529  | 25.37553 | 18.48819 | 19.39413 | 19.09169 |
| Lmo2         | ENSRNOG00000009401 | 3.199302 | 7.197064 | 7.091651 | 1.649617 | 6.092983 | 5.523185 |
| Clca2        | ENSRNOG00000013771 | 0.042141 | 0.031864 | 0.039486 | 0        | 0        | 0.009446 |
| Tox4         | ENSRNOG00000012844 | 19.52219 | 20.33232 | 18.87172 | 12.53469 | 15.01595 | 13.91192 |
| Akna         | ENSRNOG00000008005 | 1.896722 | 2.744692 | 3.102475 | 1.498788 | 2.378034 | 2.829583 |
| Prm2         | ENSRNOG00000002539 | 0.277864 | 1.540738 | 0.390536 | 0        | 1.143721 | 0        |
| Pcbp3        | ENSRNOG00000001245 | 2.260692 | 1.69862  | 1.67862  | 1.198496 | 0.975396 | 0.745795 |
| Ube2z        | ENSRNOG00000006868 | 37.11324 | 36.02608 | 33.5976  | 32.48199 | 29.49007 | 26.99832 |
| Hmgb3        | ENSRNOG00000050910 | 6.039159 | 4.99639  | 3.4764   | 4.440817 | 3.170713 | 2.233978 |
| Hnrnpull1    | ENSRNOG00000020683 | 41.84762 | 38.85627 | 37.21874 | 38.41165 | 36.31147 | 33.49986 |
| Erlin2       | ENSRNOG00000013763 | 16.90737 | 26.20444 | 20.8707  | 11.5744  | 21.73635 | 14.33408 |
| Kat2a        | ENSRNOG00000018364 | 9.499517 | 10.08194 | 10.24152 | 7.433338 | 7.99558  | 7.388825 |
| Asrg11       | ENSRNOG00000020202 | 4.445995 | 4.563324 | 5.094418 | 2.96083  | 3.552256 | 3.722305 |
| Fbxo28       | ENSRNOG00000000066 | 24.70289 | 28.52989 | 24.37916 | 16.93999 | 22.94319 | 18.66339 |
| Mt-nd4       | ENSRNOG00000029707 | 7.971452 | 5.667228 | 7.409701 | 7.314338 | 4.706023 | 6.634972 |
| Snx5         | ENSRNOG00000006077 | 64.94558 | 53.47186 | 48.79651 | 63.65986 | 52.23995 | 47.9125  |
| Mettl16      | ENSRNOG00000002764 | 9.845646 | 11.0654  | 8.906214 | 9.084434 | 10.0111  | 8.134    |
| Dusp16       | ENSRNOG00000006628 | 4.043675 | 5.058827 | 4.477798 | 3.149472 | 4.303966 | 3.872941 |
| Gnai3        | ENSRNOG00000019465 | 59.26092 | 53.36346 | 47.07799 | 56.71726 | 50.29985 | 45.00158 |
| LOC108348180 | ENSRNOG00000002100 | 20.31614 | 20.35282 | 22.04026 | 18.52891 | 19.02292 | 20.07532 |
| Tsr2         | ENSRNOG00000002556 | 23.20935 | 24.52969 | 20.13855 | 15.6248  | 14.2367  | 12.76541 |
| Cers2        | ENSRNOG00000021138 | 45.33642 | 53.81503 | 46.00484 | 39.80875 | 49.96736 | 40.50518 |
| Wwtr1        | ENSRNOG00000016617 | 61.43377 | 73.74952 | 68.69239 | 57.20702 | 68.46703 | 62.42234 |
| Dnaj1        | ENSRNOG00000007029 | 119.1946 | 117.7842 | 108.654  | 98.93851 | 103.6808 | 93.20181 |
| Hmgxb4       | ENSRNOG00000013878 | 7.091869 | 5.36506  | 6.192665 | 6.098397 | 4.651713 | 5.146742 |
| Arap3        | ENSRNOG00000055527 | 0.066194 | 0.143003 | 0.088605 | 0.026134 | 0.103795 | 0.033916 |
| Ensa         | ENSRNOG00000048617 | 39.41941 | 41.46678 | 36.73024 | 35.72172 | 36.07003 | 32.49916 |
| Pno1         | ENSRNOG00000005524 | 19.72688 | 18.83823 | 15.69243 | 16.81414 | 16.16555 | 11.85249 |
| Yae1d1       | ENSRNOG00000013438 | 12.46746 | 19.36806 | 14.64425 | 8.948812 | 14.79708 | 11.49891 |
| Hsd17b12     | ENSRNOG00000009630 | 58.83229 | 54.54732 | 46.51678 | 56.16115 | 50.60619 | 43.37924 |
| Rrp1b        | ENSRNOG00000001194 | 5.585995 | 4.819955 | 4.246848 | 4.58747  | 3.436619 | 3.252944 |
| Camlg        | ENSRNOG00000021911 | 18.25836 | 17.30054 | 18.22502 | 13.90129 | 12.51125 | 15.02102 |
| Scamp4       | ENSRNOG00000018271 | 30.06368 | 30.48834 | 30.59426 | 26.27008 | 27.17416 | 25.72799 |
| Millt1       | ENSRNOG00000048736 | 12.59629 | 10.76646 | 12.12226 | 8.657078 | 8.100719 | 9.005971 |
| Pdcd21       | ENSRNOG00000021119 | 8.314765 | 9.982445 | 8.712723 | 7.513687 | 9.405221 | 7.853752 |
| Ccer2        | ENSRNOG00000046971 | 0.530468 | 0.213921 | 0.347932 | 0.390949 | 0.048522 | 0.23782  |
| NEWGENE_130  | ENSRNOG00000057755 | 0.834095 | 0.957998 | 1.177262 | 0.641954 | 0.811228 | 0.956157 |
| 4700         |                    |          |          |          |          |          |          |
| Zfp7         | ENSRNOG00000050695 | 3.862253 | 3.411964 | 3.449467 | 3.53425  | 3.001087 | 3.173507 |
| Atp6v1b2     | ENSRNOG00000011891 | 25.19429 | 37.34451 | 35.44817 | 17.58191 | 32.17164 | 29.57115 |
| Exoc3l2      | ENSRNOG00000017448 | 0.273238 | 0.382597 | 0.28447  | 0.167811 | 0.291583 | 0.14972  |
| Hars2        | ENSRNOG00000016087 | 11.77507 | 13.3909  | 11.64883 | 9.58959  | 10.27565 | 8.409462 |
| Rrp9         | ENSRNOG00000012927 | 27.47243 | 29.55257 | 21.82884 | 21.51233 | 20.53026 | 14.11469 |

|              |                    |          |          |          |          |          |          |
|--------------|--------------------|----------|----------|----------|----------|----------|----------|
| Lgals12      | ENSRNOG00000021207 | 0.031338 | 0.031594 | 0.044045 | 0        | 0        | 0        |
| Fst          | ENSRNOG00000011631 | 25.35573 | 17.99466 | 25.47928 | 22.65971 | 13.91562 | 22.09057 |
| Slc29a1      | ENSRNOG00000019752 | 40.45287 | 45.16418 | 38.48582 | 32.76798 | 38.72429 | 28.83188 |
| Atf3         | ENSRNOG00000003745 | 1.624774 | 3.564271 | 1.381443 | 0.443497 | 2.32558  | 0.55306  |
| Eral1        | ENSRNOG00000010673 | 12.20559 | 12.43552 | 11.1542  | 11.00626 | 11.36127 | 9.57363  |
| Hspe1        | ENSRNOG00000051624 | 317.4909 | 260.5956 | 246.8057 | 290.3703 | 219.4917 | 213.1028 |
| Sirpa        | ENSRNOG00000004763 | 6.053221 | 7.340739 | 11.07893 | 4.24491  | 5.218743 | 8.370355 |
| Tra2b        | ENSRNOG00000001783 | 80.15972 | 72.38623 | 56.44566 | 73.64288 | 64.78685 | 51.46334 |
| Txn14b       | ENSRNOG00000021379 | 6.035471 | 7.172273 | 7.050965 | 4.755659 | 5.779014 | 5.181378 |
| Prodh2       | ENSRNOG00000057578 | 0.061294 | 0.092691 | 0.086148 | 0        | 0        | 0        |
| LOC690000    | ENSRNOG00000014966 | 35.22833 | 62.64652 | 46.03233 | 26.59395 | 55.23014 | 40.3777  |
| Pdcd10       | ENSRNOG00000010147 | 30.93755 | 35.41769 | 31.56362 | 29.83171 | 34.06761 | 29.88835 |
| Fam220a      | ENSRNOG00000024605 | 5.649719 | 5.016752 | 5.456647 | 5.384893 | 4.80999  | 5.2801   |
| Abraxas2     | ENSRNOG00000017222 | 19.98652 | 22.66506 | 18.55939 | 18.20915 | 21.37048 | 16.58598 |
| Rab21        | ENSRNOG00000003923 | 30.66107 | 35.61227 | 32.90458 | 24.46727 | 31.20362 | 28.52397 |
| Ndufb11      | ENSRNOG00000008329 | 45.72238 | 43.54948 | 42.02059 | 39.60432 | 36.35256 | 32.8158  |
| Prkrip1      | ENSRNOG00000001426 | 8.791361 | 11.1358  | 8.267642 | 7.73304  | 9.514179 | 6.881731 |
| AABR07043288 | ENSRNOG00000057732 | 5.096964 | 3.898252 | 4.281782 | 2.428713 | 1.768404 | 2.521465 |
| .1           |                    |          |          |          |          |          |          |
| Ssr3         | ENSRNOG00000011148 | 153.5237 | 198.3292 | 158.0227 | 120.8079 | 176.7754 | 127.4888 |
| Znhit6       | ENSRNOG00000030049 | 4.485698 | 4.211434 | 3.625156 | 3.538359 | 3.282429 | 2.991413 |
| Smap2        | ENSRNOG00000011421 | 12.57376 | 10.80547 | 9.287751 | 11.05328 | 8.816655 | 7.958997 |
| Bccip        | ENSRNOG00000018066 | 10.59441 | 10.06521 | 6.999465 | 7.336199 | 6.875834 | 4.823419 |
| Tgfb31       | ENSRNOG00000050573 | 1.125909 | 0.78964  | 1.10084  | 0.58626  | 0.358212 | 0.43893  |
| Kcnn4        | ENSRNOG00000019440 | 40.78062 | 35.42204 | 16.86398 | 38.14034 | 31.35031 | 13.26559 |
| RGD1564541   | ENSRNOG00000012564 | 12.43428 | 11.71062 | 12.07088 | 11.05094 | 9.573031 | 10.25788 |
| Ogfod2       | ENSRNOG00000001081 | 8.007806 | 8.71694  | 9.198373 | 6.421251 | 7.665366 | 7.657226 |
| Stard8       | ENSRNOG00000033883 | 1.717603 | 1.763264 | 1.28604  | 1.314987 | 1.198038 | 0.893104 |
| Parp2        | ENSRNOG00000008892 | 13.29247 | 9.928367 | 9.434345 | 11.04537 | 7.392064 | 7.800545 |
| Gmcl1        | ENSRNOG00000017838 | 9.548214 | 9.956588 | 9.444259 | 7.286765 | 8.299584 | 6.869333 |
| Prpf38a      | ENSRNOG00000009451 | 46.11562 | 50.11585 | 36.17766 | 33.23201 | 39.23254 | 27.89    |
| Pnrc2        | ENSRNOG00000009248 | 80.05634 | 95.65066 | 83.52355 | 71.64476 | 89.80666 | 74.52729 |
| Zfp422       | ENSRNOG00000013379 | 8.778483 | 7.922507 | 8.570282 | 8.239648 | 7.103769 | 7.772154 |
| Nup85        | ENSRNOG00000003673 | 36.01004 | 16.41951 | 12.43296 | 30.43077 | 12.21014 | 8.761876 |
| Btg2         | ENSRNOG00000003300 | 15.88608 | 14.1904  | 12.66041 | 7.663622 | 8.218544 | 7.137385 |
| Mdp1         | ENSRNOG00000019840 | 10.92358 | 9.313167 | 8.482569 | 10.29723 | 8.36516  | 7.537451 |
| AABR07001512 | ENSRNOG00000017412 | 20.65248 | 9.832237 | 7.295128 | 15.93035 | 5.4723   | 4.262055 |
| .1           |                    |          |          |          |          |          |          |
| Lin54        | ENSRNOG00000002203 | 10.98404 | 7.870366 | 5.440873 | 9.763526 | 6.713493 | 4.651309 |
| Sft2d2       | ENSRNOG00000003038 | 19.57291 | 24.08303 | 21.83903 | 14.31965 | 20.4652  | 18.15326 |
| Prkx         | ENSRNOG00000060168 | 6.094736 | 5.984515 | 5.393478 | 3.041293 | 3.300366 | 3.45345  |
| LOC103693323 | ENSRNOG00000003349 | 0.080065 | 0.129151 | 0.43512  | 0.029504 | 0.073235 | 0.358949 |
| Yif1b        | ENSRNOG00000055286 | 2.538288 | 2.007511 | 2.439875 | 1.935198 | 1.541164 | 1.706953 |
| Med12        | ENSRNOG00000003848 | 4.94907  | 5.65595  | 6.539301 | 4.117351 | 4.451967 | 5.701672 |
| Abcf1        | ENSRNOG00000000799 | 26.61219 | 26.09405 | 22.53721 | 23.01761 | 20.65513 | 18.53163 |
| LOC100360117 | ENSRNOG00000048456 | 91.37204 | 92.80258 | 99.17802 | 85.68586 | 85.54267 | 90.24256 |
| Actn4        | ENSRNOG00000020433 | 136.8243 | 88.72929 | 79.53329 | 121.9715 | 73.59299 | 69.66975 |
| Carns1       | ENSRNOG00000018603 | 7.976539 | 6.433365 | 5.835456 | 7.206969 | 5.261599 | 4.965212 |
| Oasl         | ENSRNOG00000001187 | 35.57782 | 122.6497 | 57.76396 | 16.98932 | 101.0516 | 44.10964 |
| Eif1b        | ENSRNOG00000018848 | 18.41678 | 18.13656 | 16.94512 | 14.77985 | 15.32611 | 12.51263 |
| Lsm10        | ENSRNOG00000025716 | 12.60739 | 15.53492 | 16.15811 | 8.187925 | 12.50393 | 13.0801  |
| Chd3         | ENSRNOG00000009722 | 19.20641 | 15.30643 | 21.9486  | 15.38754 | 12.82823 | 18.20328 |
| Ipo13        | ENSRNOG00000019758 | 16.41747 | 16.25515 | 14.93538 | 14.15371 | 13.24629 | 12.98489 |
| Msmg         | ENSRNOG00000043023 | 19.97719 | 19.28699 | 21.73254 | 16.53216 | 15.7953  | 16.698   |
| RGD1563941   | ENSRNOG00000005918 | 5.452513 | 6.885789 | 5.700548 | 3.806947 | 5.853603 | 4.322866 |
| Tmem254      | ENSRNOG00000011276 | 19.45753 | 19.77623 | 15.05445 | 13.54592 | 12.55112 | 10.51333 |
| Tomm6        | ENSRNOG00000046316 | 431.9952 | 404.9339 | 351.7429 | 392.236  | 367.0329 | 295.2615 |

|              |                    |          |          |          |          |          |          |
|--------------|--------------------|----------|----------|----------|----------|----------|----------|
| Gfer         | ENSRNOG00000013370 | 26.32235 | 29.95346 | 22.65874 | 19.09043 | 24.85986 | 17.81324 |
| Mtx3         | ENSRNOG00000023837 | 7.953557 | 9.514817 | 9.484935 | 6.590893 | 8.388947 | 8.632867 |
| Slc30a3      | ENSRNOG00000006204 | 0.111699 | 0.112611 | 0.083729 | 0        | 0.040868 | 0        |
| Prr13        | ENSRNOG00000042094 | 57.93825 | 84.33004 | 69.89251 | 42.30267 | 73.8982  | 53.448   |
| Ccdc94       | ENSRNOG00000047456 | 14.79959 | 17.20447 | 12.10152 | 11.76146 | 15.10575 | 10.04263 |
| Zfp827       | ENSRNOG00000011697 | 1.436891 | 1.048532 | 1.307893 | 0.995939 | 0.638381 | 1.030702 |
| Mthfr        | ENSRNOG00000008553 | 4.494483 | 5.068556 | 5.62858  | 2.72051  | 3.96613  | 4.068695 |
| Serpib5      | ENSRNOG00000002640 | 0.849119 | 1.592264 | 1.066132 | 0.344185 | 1.165025 | 0.395905 |
| LOC108348142 | ENSRNOG00000032635 | 585.4432 | 570.711  | 566.2023 | 552.4638 | 530.9781 | 541.5351 |
| Rnf213       | ENSRNOG00000029658 | 58.89385 | 139.3003 | 128.8701 | 34.28392 | 120.4206 | 113.3414 |
| Nfx1         | ENSRNOG00000009015 | 26.05065 | 23.83219 | 24.60203 | 20.3047  | 19.26274 | 21.0198  |
| Atad1        | ENSRNOG00000010861 | 26.04846 | 39.61762 | 37.26078 | 17.69827 | 30.67953 | 31.68016 |
| Ltv1         | ENSRNOG00000015217 | 17.14402 | 19.7132  | 17.06244 | 14.72656 | 16.63512 | 15.14356 |
| Hipk4        | ENSRNOG00000020835 | 0.365001 | 0.367983 | 0.410405 | 0.201751 | 0.267091 | 0.278184 |
| Ube2n        | ENSRNOG00000058053 | 48.56081 | 41.5694  | 33.8364  | 43.92262 | 38.01124 | 30.9278  |
| Anapc2       | ENSRNOG00000011295 | 33.37625 | 32.71332 | 33.2566  | 28.27264 | 28.35476 | 26.39378 |
| Pcgf3        | ENSRNOG00000000062 | 19.15036 | 18.87846 | 17.17601 | 16.21612 | 15.01828 | 14.74913 |
| Hdgf         | ENSRNOG00000042261 | 138.5927 | 164.0469 | 104.2374 | 110.7278 | 137.312  | 86.73947 |
| Tfpt         | ENSRNOG00000056098 | 14.32055 | 16.28555 | 14.16972 | 10.80035 | 14.11188 | 11.36805 |
| Kbtbd6       | ENSRNOG00000011657 | 0.457687 | 0.483399 | 0.510537 | 0.30117  | 0.318966 | 0.273588 |
| AABR07002848 | ENSRNOG00000050453 | 7.883654 | 8.824226 | 6.456311 | 6.404912 | 6.870439 | 5.232041 |
| .1           |                    |          |          |          |          |          |          |
| Celf1        | ENSRNOG00000010379 | 42.16462 | 45.02652 | 33.39201 | 35.39308 | 37.28543 | 28.65446 |
| Lrtomt       | ENSRNOG00000023434 | 0.698621 | 0.402473 | 0.56109  | 0.505682 | 0.091289 | 0.268463 |
| Snx15        | ENSRNOG00000021007 | 8.779241 | 9.278807 | 8.052146 | 7.892286 | 7.836224 | 6.730307 |
| Rnf26        | ENSRNOG00000007720 | 11.16479 | 9.249586 | 8.447409 | 8.873692 | 6.735421 | 6.905865 |
| Rabgga       | ENSRNOG00000030483 | 8.468829 | 8.650571 | 7.980088 | 7.111242 | 6.798139 | 5.748762 |
| Pebp1        | ENSRNOG00000001136 | 181.2835 | 182.1607 | 165.4469 | 156.0062 | 152.524  | 125.2038 |
| Fgfr1op      | ENSRNOG00000055093 | 13.13454 | 15.17094 | 11.44898 | 11.69711 | 13.98933 | 10.57601 |
| Sacm11       | ENSRNOG00000005149 | 36.47827 | 51.67433 | 41.56305 | 35.4258  | 49.94328 | 40.15529 |
| Ric8b        | ENSRNOG00000007323 | 8.479712 | 8.486436 | 9.263237 | 7.564132 | 7.926594 | 8.419233 |
| Ikkkb        | ENSRNOG00000019073 | 13.93431 | 14.42111 | 15.08995 | 11.82576 | 12.48619 | 12.085   |
| Ciao1        | ENSRNOG00000012638 | 31.62634 | 37.92207 | 28.03057 | 24.30819 | 33.35446 | 20.83068 |
| AABR07048397 | ENSRNOG00000038905 | 6.617716 | 6.711495 | 7.086597 | 4.898961 | 4.071483 | 5.262651 |
| .1           |                    |          |          |          |          |          |          |
| AABR07030494 | ENSRNOG00000049929 | 4.318007 | 2.353127 | 3.936605 | 3.332841 | 1.280968 | 2.406739 |
| .1           |                    |          |          |          |          |          |          |
| Gpam         | ENSRNOG00000015124 | 10.17324 | 10.73373 | 13.32369 | 6.728251 | 8.229169 | 9.173225 |
| Zfp672       | ENSRNOG00000002713 | 9.903366 | 8.352956 | 9.110951 | 9.247567 | 7.674405 | 8.114051 |
| RGD1559575   | ENSRNOG00000032396 | 0.111398 | 0.16044  | 0.149114 | 0.014661 | 0.101895 | 0.071346 |
| Hnrnpa3      | ENSRNOG00000052968 | 17.73577 | 19.46748 | 17.69745 | 14.07546 | 13.5541  | 13.28663 |
| Fbxo39       | ENSRNOG00000014953 | 0.90206  | 2.204679 | 1.152582 | 0.528825 | 1.800236 | 0.906865 |
| Cep250       | ENSRNOG00000019340 | 7.067628 | 5.814956 | 5.263073 | 6.142112 | 4.840571 | 4.667005 |
| Igf2bp2      | ENSRNOG00000025946 | 3.595343 | 3.318575 | 4.028928 | 2.416984 | 2.599799 | 3.125719 |
| Parp16       | ENSRNOG00000029127 | 10.27076 | 11.91925 | 12.37327 | 9.097886 | 9.962395 | 10.7019  |
| Rasgrp2      | ENSRNOG00000021098 | 4.620145 | 3.607388 | 4.881702 | 3.296328 | 2.805354 | 3.649031 |
| Smn1         | ENSRNOG00000018067 | 12.19041 | 11.95203 | 10.16591 | 9.433418 | 8.697379 | 8.225161 |
| Tuft1        | ENSRNOG00000020923 | 13.86684 | 13.88926 | 12.1728  | 7.567523 | 9.139003 | 8.335245 |
| Arl16        | ENSRNOG00000049235 | 11.82284 | 9.804695 | 7.906443 | 10.62813 | 8.110703 | 6.839269 |
| Eif2b2       | ENSRNOG00000006467 | 53.9437  | 56.02799 | 45.75868 | 50.27898 | 53.84863 | 42.58612 |
| Adgra2       | ENSRNOG00000012991 | 33.90014 | 32.52709 | 40.73026 | 24.81719 | 25.35948 | 35.29769 |
| Tmx1         | ENSRNOG00000057934 | 80.71368 | 81.75739 | 77.50346 | 73.50049 | 70.77748 | 70.21387 |
| Pfdn1        | ENSRNOG00000018653 | 104.6348 | 118.1644 | 101.2856 | 100.2785 | 110.8474 | 94.67615 |
| Nxph3        | ENSRNOG00000005185 | 1.578977 | 0.926615 | 0.574132 | 1.324348 | 0.53891  | 0.316965 |
| Sfxn2        | ENSRNOG00000059312 | 0.646585 | 0.594686 | 0.68025  | 0.438906 | 0.45654  | 0.447531 |
| Tmed10       | ENSRNOG00000007901 | 220.0431 | 227.0557 | 236.5674 | 127.9097 | 172.1985 | 152.4757 |
| Mrps18c      | ENSRNOG00000002178 | 46.79296 | 50.9929  | 41.66524 | 39.76844 | 46.75968 | 34.97189 |

|              |                    |          |          |          |          |          |          |
|--------------|--------------------|----------|----------|----------|----------|----------|----------|
| Smyd5        | ENSRNOG00000015589 | 16.05197 | 16.16299 | 14.29234 | 14.34625 | 13.75127 | 11.40332 |
| Clec2e       | ENSRNOG00000052128 | 0.044794 | 0.09032  | 0.167887 | 0        | 0.020486 | 0.120492 |
| Zfp687       | ENSRNOG00000021026 | 7.146899 | 6.462242 | 6.68615  | 5.812426 | 5.495349 | 5.867522 |
| LOC100911730 | ENSRNOG00000019215 | 31.9105  | 33.25954 | 33.84486 | 23.84787 | 26.73949 | 23.05634 |
| Fhl3         | ENSRNOG00000007541 | 9.103245 | 10.6281  | 7.622808 | 7.374112 | 8.111329 | 6.027949 |
| Bak1         | ENSRNOG00000000485 | 17.04317 | 21.47257 | 17.62906 | 12.63626 | 18.61229 | 14.70059 |
| Phb2         | ENSRNOG00000012999 | 121.5728 | 128.5168 | 107.7408 | 111.8471 | 112.3353 | 95.64459 |
| Mta2         | ENSRNOG00000019913 | 49.82722 | 51.44512 | 46.24874 | 44.67482 | 43.51347 | 41.00008 |
| Hdac3        | ENSRNOG00000019618 | 34.03835 | 31.00735 | 35.35654 | 30.19268 | 28.28804 | 32.98366 |
| Fam110c      | ENSRNOG00000005660 | 3.812257 | 6.594768 | 3.321629 | 1.801354 | 4.503563 | 2.068598 |
| Triobp       | ENSRNOG00000059015 | 9.198142 | 13.07605 | 10.40989 | 7.400376 | 12.02262 | 8.95734  |
| LOC100361898 | ENSRNOG00000022466 | 7.891795 | 9.567249 | 6.600119 | 6.218735 | 7.367713 | 5.29247  |
| Tbc1d5       | ENSRNOG00000010637 | 11.06604 | 11.15645 | 12.94358 | 9.272138 | 10.05384 | 11.11602 |
| Vta1         | ENSRNOG00000011540 | 33.29838 | 35.23296 | 32.3296  | 29.65317 | 32.28526 | 30.19797 |
| Katnb1       | ENSRNOG00000014626 | 14.61145 | 13.99963 | 12.6135  | 11.92877 | 12.42653 | 10.48417 |
| LOC103690128 | ENSRNOG00000054319 | 1.553337 | 0.612793 | 0.632813 | 0.995472 | 0.185325 | 0.30278  |
| Dennd2a      | ENSRNOG00000026748 | 3.790947 | 4.682619 | 5.371006 | 2.640337 | 4.006743 | 4.319532 |
| Gch1         | ENSRNOG00000011039 | 2.657708 | 6.847409 | 4.676157 | 1.387414 | 4.861973 | 2.515404 |
| Tulp2        | ENSRNOG00000020927 | 0.832271 | 1.118761 | 1.104766 | 0.404657 | 0.401783 | 0.414583 |
| Aldh1a2      | ENSRNOG00000055049 | 1.570603 | 1.192463 | 0.926593 | 1.375446 | 0.904538 | 0.591126 |
| Tnfrsf9      | ENSRNOG00000036942 | 6.726957 | 13.92484 | 8.939421 | 5.278156 | 11.44056 | 6.926109 |
| Prkab1       | ENSRNOG00000001142 | 14.33231 | 14.70704 | 14.7463  | 10.31949 | 11.1812  | 12.41177 |
| Nme4         | ENSRNOG00000050424 | 4.213946 | 5.111324 | 5.583355 | 3.376568 | 4.025107 | 4.162149 |
| Trim62       | ENSRNOG00000049496 | 1.562985 | 1.792035 | 2.325987 | 0.903454 | 1.121295 | 1.923544 |
| LOC100909712 | ENSRNOG00000011586 | 27.49712 | 31.38846 | 32.20586 | 23.01178 | 28.78888 | 28.50745 |
| Mdm2         | ENSRNOG00000006304 | 90.94761 | 80.74317 | 95.47609 | 79.55999 | 73.65292 | 87.69471 |
| Hdgfl3       | ENSRNOG00000019740 | 19.48803 | 29.70936 | 23.85437 | 16.02288 | 24.60546 | 20.66555 |
| Pcbd1        | ENSRNOG00000000566 | 0.942166 | 0.712397 | 0.529683 | 0.867958 | 0.646344 | 0.422393 |
| Slc30a4      | ENSRNOG00000000170 | 19.31651 | 18.2995  | 17.16684 | 17.40742 | 17.06911 | 15.91961 |
| Psmb10       | ENSRNOG00000019494 | 93.63475 | 281.8259 | 143.9749 | 74.48052 | 253.0426 | 110.8263 |
| Tada2a       | ENSRNOG00000002757 | 13.16449 | 11.92803 | 11.37871 | 12.1468  | 10.47912 | 10.49645 |
| LOC103689941 | ENSRNOG00000049397 | 9.853038 | 14.84232 | 12.91438 | 8.105709 | 12.64205 | 9.951877 |
| Parp10       | ENSRNOG00000004361 | 20.73735 | 37.41373 | 32.81362 | 14.60564 | 33.70748 | 26.58435 |
| Mrpl22       | ENSRNOG00000027039 | 46.91205 | 53.16755 | 43.80889 | 39.01142 | 48.42988 | 38.15814 |
| Ppwd1        | ENSRNOG00000012505 | 6.458385 | 5.953564 | 6.335665 | 5.653861 | 5.483148 | 5.726877 |
| Eif6         | ENSRNOG00000049497 | 171.9689 | 217.6738 | 145.8482 | 146.9237 | 175.8865 | 116.0673 |
| Eaf1         | ENSRNOG00000019559 | 10.15409 | 12.44629 | 11.28877 | 8.266031 | 10.51691 | 10.14766 |
| Trim25       | ENSRNOG00000002341 | 29.30164 | 56.99659 | 45.79289 | 23.74588 | 47.28604 | 37.74037 |
| Epc2         | ENSRNOG00000029447 | 8.928437 | 10.22231 | 8.822028 | 7.536125 | 9.372247 | 7.867223 |
| Otud4        | ENSRNOG00000018477 | 15.29213 | 15.93519 | 13.44048 | 10.40531 | 9.621048 | 9.799836 |
| Spr          | ENSRNOG00000015455 | 27.25146 | 20.67873 | 16.95249 | 23.7978  | 17.28646 | 11.62461 |
| Arnt         | ENSRNOG00000031174 | 15.35219 | 17.50036 | 19.58835 | 12.32768 | 14.96014 | 15.32348 |
| Tp53i11      | ENSRNOG00000008738 | 3.941538 | 4.967175 | 4.543228 | 2.478363 | 3.619604 | 3.702445 |
| Polr3c       | ENSRNOG00000033560 | 10.73272 | 13.824   | 11.09684 | 8.983875 | 11.0189  | 9.241797 |
| LOC100361920 | ENSRNOG00000052174 | 15.56039 | 14.87045 | 12.75751 | 13.43888 | 12.75037 | 9.44674  |
| Wdpcp        | ENSRNOG00000054331 | 3.169087 | 2.65403  | 2.576641 | 2.687775 | 2.208565 | 2.300294 |
| Ppp4c        | ENSRNOG00000019813 | 82.26286 | 76.31676 | 80.25943 | 66.49323 | 65.38273 | 60.99308 |
| Plekhg6      | ENSRNOG00000019528 | 2.74222  | 2.463712 | 4.404768 | 2.423122 | 2.03052  | 3.847089 |
| Ak2          | ENSRNOG00000000122 | 62.98321 | 63.49777 | 45.28945 | 54.72055 | 49.91308 | 36.04985 |
| Tmc1         | ENSRNOG00000051262 | 0.05324  | 0.035784 | 0.033257 | 0.032698 | 0        | 0        |
| Dnajc9       | ENSRNOG00000006619 | 53.63708 | 26.661   | 20.92821 | 47.07704 | 20.84502 | 17.20352 |
| Pcgf2        | ENSRNOG00000012705 | 2.188179 | 3.211759 | 2.954866 | 1.274717 | 2.119248 | 2.337106 |
| Lamtor2      | ENSRNOG00000019908 | 23.62459 | 24.07025 | 22.58442 | 13.70472 | 16.42053 | 16.91357 |
| AABR07062570 | ENSRNOG00000056041 | 18.74072 | 19.03085 | 18.08352 | 11.37992 | 14.73853 | 12.74159 |
| .1           |                    |          |          |          |          |          |          |
| LOC103694876 | ENSRNOG00000061740 | 12.56297 | 14.79839 | 12.22548 | 10.04922 | 11.29668 | 10.17302 |
| Kank3        | ENSRNOG00000007230 | 3.294034 | 2.977399 | 3.086495 | 2.780457 | 2.211534 | 2.61893  |

|               |                    |          |          |          |          |          |          |
|---------------|--------------------|----------|----------|----------|----------|----------|----------|
| Simc1         | ENSRNOG00000016932 | 6.548483 | 5.78107  | 4.749681 | 6.117225 | 5.035251 | 4.030975 |
| Ppp1r12a      | ENSRNOG00000004925 | 25.11001 | 23.61877 | 21.99416 | 23.40581 | 21.68653 | 20.90359 |
| Clic1         | ENSRNOG00000029682 | 197.1229 | 205.5096 | 140.1282 | 179.808  | 176.3107 | 110.355  |
| Rab34         | ENSRNOG00000023375 | 90.45245 | 84.43938 | 97.70102 | 56.20216 | 65.16797 | 67.88538 |
| Cct7          | ENSRNOG00000015630 | 111.8559 | 107.0017 | 84.73425 | 95.13168 | 91.07445 | 75.13429 |
| 6-Sep         | ENSRNOG00000043182 | 0.842575 | 1.115707 | 0.954457 | 0.718285 | 0.931738 | 0.732937 |
| Dstyk         | ENSRNOG00000021298 | 6.263189 | 7.627745 | 8.296498 | 5.169813 | 5.931862 | 7.233206 |
| 1700092M07Rik | ENSRNOG00000048966 | 0.686488 | 0.692096 | 0.482427 | 0.474313 | 0.313963 | 0.153884 |
| Mrps34        | ENSRNOG00000015479 | 32.5434  | 34.47422 | 32.268   | 30.24866 | 30.70022 | 29.74598 |
| Pisd          | ENSRNOG00000018319 | 45.13406 | 52.44181 | 52.70608 | 37.37074 | 48.08087 | 46.50399 |
| Pawr          | ENSRNOG00000005917 | 31.15901 | 29.11451 | 30.08941 | 21.60024 | 23.76025 | 21.78571 |
| Oxnad1        | ENSRNOG00000019760 | 9.176747 | 6.04552  | 5.010892 | 6.282165 | 4.211425 | 3.177812 |
| Sp2           | ENSRNOG00000010492 | 1.174861 | 0.847966 | 1.038292 | 0.72565  | 0.573954 | 0.74219  |
| Ckap4         | ENSRNOG00000008016 | 51.32088 | 38.25101 | 28.79131 | 39.98435 | 24.09984 | 20.88299 |
| Pdss1         | ENSRNOG00000048849 | 6.117817 | 4.610582 | 4.199953 | 5.440653 | 4.210794 | 3.503114 |
| Psmb5         | ENSRNOG00000013386 | 55.19325 | 53.06665 | 48.61571 | 46.68971 | 45.07415 | 35.59945 |
| Banf1         | ENSRNOG00000020460 | 71.46715 | 71.70406 | 51.86249 | 63.93594 | 61.85539 | 38.62316 |
| Nudt21        | ENSRNOG00000042983 | 30.53274 | 29.10056 | 26.99316 | 21.66889 | 23.60957 | 21.26784 |
| Slco3a1       | ENSRNOG00000032798 | 5.068664 | 4.52844  | 3.359273 | 3.834256 | 2.764173 | 2.327815 |
| Psm6          | ENSRNOG00000007114 | 141.605  | 196.0387 | 138.1893 | 121.707  | 163.6542 | 117.0945 |
| Rad9a         | ENSRNOG00000018729 | 17.26045 | 11.90036 | 10.81676 | 14.70411 | 8.250509 | 8.686785 |
| Rprd2         | ENSRNOG00000054294 | 5.323096 | 5.505856 | 5.522734 | 4.343879 | 4.254056 | 4.822462 |
| Npr1          | ENSRNOG00000014684 | 1.290961 | 1.995646 | 2.278128 | 0.693747 | 1.348118 | 1.292576 |
| Fam216a       | ENSRNOG00000031731 | 28.52764 | 31.39799 | 26.79652 | 20.77707 | 24.5743  | 22.50454 |
| Tnfaip3       | ENSRNOG00000049517 | 28.65665 | 48.86708 | 36.24319 | 19.77081 | 33.46496 | 25.35774 |
| LOC100910581  | ENSRNOG00000050881 | 1.103284 | 0.593225 | 0.895936 | 0.914747 | 0.437305 | 0.626526 |
| Egr2          | ENSRNOG00000000640 | 1.651456 | 2.169892 | 1.52204  | 0.473873 | 0.730524 | 0.728246 |
| Rrp1          | ENSRNOG00000001203 | 36.13068 | 38.18685 | 35.15466 | 33.24083 | 35.21524 | 30.48686 |
| Maea          | ENSRNOG00000005397 | 79.20192 | 73.28212 | 74.80311 | 57.00584 | 59.5799  | 60.63083 |
| Pja1          | ENSRNOG00000047339 | 20.85748 | 22.56942 | 20.44751 | 16.9308  | 20.40891 | 17.18427 |
| Acin1         | ENSRNOG00000013533 | 19.66615 | 24.70968 | 23.3856  | 18.30274 | 22.29299 | 21.06498 |
| Rbm19         | ENSRNOG00000001397 | 6.195172 | 7.971594 | 5.833492 | 4.496313 | 5.359113 | 4.248368 |
| Frm8          | ENSRNOG00000020881 | 32.58333 | 29.07747 | 29.57809 | 26.52946 | 25.61343 | 23.56267 |
| Dnttip1       | ENSRNOG00000014933 | 13.16079 | 16.35892 | 14.73354 | 11.80771 | 14.0686  | 12.32183 |
| Cdkn2aip      | ENSRNOG00000022736 | 21.55172 | 26.77804 | 21.59471 | 19.01357 | 23.69137 | 19.8987  |
| Cnst          | ENSRNOG00000002710 | 8.76939  | 9.025922 | 7.873209 | 5.928465 | 6.511587 | 6.308346 |
| RGD1304622    | ENSRNOG00000000040 | 9.218798 | 8.266233 | 8.373056 | 7.758662 | 5.963786 | 6.952325 |
| Lsg1          | ENSRNOG00000001727 | 13.14565 | 16.94652 | 13.5445  | 12.04917 | 16.34568 | 12.66392 |
| LOC361646     | ENSRNOG00000016635 | 2.218344 | 2.47722  | 3.073706 | 1.858363 | 2.213045 | 2.597613 |
| Znf48         | ENSRNOG00000017837 | 10.06825 | 11.04554 | 11.0787  | 7.93693  | 9.763024 | 8.75625  |
| Rbm43         | ENSRNOG00000004673 | 9.953618 | 13.29455 | 10.86288 | 8.595208 | 11.80839 | 10.04303 |
| Cd151         | ENSRNOG00000046094 | 612.477  | 577.0141 | 499.4177 | 420.3291 | 450.7425 | 384.8035 |
| Dnajc5        | ENSRNOG00000015202 | 48.30204 | 46.93998 | 44.46146 | 40.31663 | 39.73373 | 40.07598 |
| Cish          | ENSRNOG00000029543 | 2.87246  | 3.383223 | 2.575025 | 2.277273 | 2.374783 | 1.906913 |
| Cnbp          | ENSRNOG00000010239 | 326.3612 | 369.9511 | 287.9431 | 280.8169 | 304.7857 | 250.7604 |
| Zbtb21        | ENSRNOG00000001623 | 8.302036 | 9.078738 | 8.604496 | 6.313619 | 7.865021 | 7.35281  |
| Tbc1d2b       | ENSRNOG00000014543 | 20.8924  | 26.35978 | 37.11839 | 15.06398 | 20.05722 | 27.3568  |
| Cib1          | ENSRNOG00000033498 | 78.31641 | 75.29203 | 78.65372 | 62.42427 | 59.33949 | 52.94539 |
| AABR07036855  | ENSRNOG00000056398 | 110.0756 | 113.4656 | 104.3897 | 96.88997 | 101.4028 | 84.0713  |
| .1            |                    |          |          |          |          |          |          |
| Nup54         | ENSRNOG00000002247 | 19.18708 | 17.57003 | 14.64635 | 15.93556 | 15.09393 | 12.86976 |
| Rangrf        | ENSRNOG00000004980 | 19.08448 | 31.52262 | 28.70931 | 15.31743 | 24.58249 | 23.3004  |
| Wdhd1         | ENSRNOG00000011167 | 18.99018 | 8.300843 | 6.576573 | 16.031   | 6.125625 | 4.94344  |
| Stam2         | ENSRNOG00000027447 | 11.87636 | 11.64535 | 10.80145 | 6.979937 | 8.418469 | 7.939753 |
| Rfesd         | ENSRNOG00000012810 | 8.003458 | 8.927232 | 8.137436 | 6.274962 | 7.476466 | 5.598487 |
| Rab8b         | ENSRNOG00000018009 | 14.41298 | 20.64841 | 16.2133  | 11.42654 | 16.47026 | 13.89077 |
| Akap2         | ENSRNOG00000011504 | 80.86527 | 64.07495 | 63.46746 | 74.82129 | 53.6549  | 56.55791 |

|              |                     |          |          |          |          |          |          |
|--------------|---------------------|----------|----------|----------|----------|----------|----------|
| Sgca         | ENSRNOG00000003998  | 3.82576  | 2.788518 | 5.183312 | 2.381372 | 2.009788 | 4.056145 |
| Pip4p1       | ENSRNOG00000009948  | 11.39677 | 16.16693 | 14.89996 | 7.855814 | 11.11134 | 8.343373 |
| 9-Sep        | ENSRNOG00000002807  | 86.65242 | 78.98227 | 82.63938 | 83.07454 | 73.44762 | 75.94302 |
| Tfe3         | ENSRNOG00000009605  | 21.83097 | 25.03272 | 24.76571 | 20.34562 | 23.52532 | 22.33188 |
| Cxcl1        | ENSRNOG00000002802  | 554.0395 | 608.9287 | 595.9198 | 383.0951 | 517.5833 | 457.9165 |
| Tymp         | ENSRNOG000000032394 | 18.11228 | 15.22001 | 15.10483 | 17.26876 | 14.26854 | 13.65316 |
| Cdk5         | ENSRNOG00000008017  | 20.72359 | 24.41675 | 21.41397 | 16.97643 | 22.30419 | 18.84128 |
| Xpo6         | ENSRNOG00000016722  | 19.12472 | 18.16008 | 19.50761 | 14.46311 | 15.18869 | 16.74607 |
| LOC100911295 | ENSRNOG00000048226  | 102.9426 | 95.90088 | 72.60302 | 75.13709 | 66.90915 | 56.78381 |
| Tars2        | ENSRNOG00000057194  | 16.19773 | 16.40497 | 17.35283 | 11.89306 | 14.10234 | 13.49094 |
| Inhbb        | ENSRNOG00000060237  | 16.73933 | 11.13284 | 19.39221 | 12.73225 | 8.059953 | 13.80141 |
| Ddx49        | ENSRNOG00000022368  | 65.5027  | 53.66719 | 49.51383 | 62.27928 | 49.18951 | 43.54348 |
| Ccl2         | ENSRNOG00000007159  | 1984.351 | 2130.707 | 1329.783 | 1322.434 | 1715.835 | 933.4023 |
| Hist1h1c     | ENSRNOG00000054978  | 1722.395 | 1556.254 | 1068.795 | 1434.805 | 1403.627 | 823.985  |
| Rad18        | ENSRNOG00000005907  | 10.05835 | 5.830356 | 3.557093 | 7.419437 | 3.780724 | 2.147321 |
| Usp37        | ENSRNOG00000022720  | 8.968042 | 12.69594 | 11.76744 | 7.380655 | 9.83732  | 9.7767   |
| Nono         | ENSRNOG00000003689  | 99.02367 | 85.85811 | 78.99585 | 93.48156 | 82.77087 | 73.38397 |
| Zmat2        | ENSRNOG00000016016  | 30.43742 | 25.42497 | 23.50412 | 24.63565 | 22.04327 | 19.76073 |
| Rab6b        | ENSRNOG00000009198  | 1.473615 | 1.971529 | 2.561808 | 1.075793 | 1.220744 | 1.903013 |
| LOC103694903 | ENSRNOG00000005389  | 20.6583  | 20.58986 | 18.91581 | 17.60059 | 17.64774 | 17.25729 |
| Fam110a      | ENSRNOG00000050946  | 5.6414   | 5.323643 | 5.001202 | 4.199649 | 4.482554 | 3.423308 |
| Plekhh1      | ENSRNOG00000010650  | 0.361683 | 0.405153 | 0.517756 | 0.249896 | 0.220552 | 0.306283 |
| Ssr1         | ENSRNOG00000014165  | 71.23445 | 52.79618 | 45.7233  | 55.31128 | 41.66323 | 36.94732 |
| Helz2        | ENSRNOG00000013267  | 19.86836 | 35.82278 | 34.14911 | 12.78696 | 29.68154 | 30.41474 |
| Polg         | ENSRNOG00000032293  | 22.0764  | 18.38744 | 19.53067 | 17.51901 | 15.64423 | 16.73141 |
| Mipol1       | ENSRNOG00000009151  | 4.810335 | 5.534909 | 4.678735 | 3.781189 | 4.184763 | 3.961536 |
| Mnat1        | ENSRNOG00000007267  | 26.80982 | 26.85929 | 21.71663 | 24.91512 | 25.23044 | 20.72105 |
| Gprasp2      | ENSRNOG00000037658  | 5.357578 | 6.964098 | 8.813252 | 4.020572 | 4.68029  | 7.367677 |
| Mical2       | ENSRNOG00000016244  | 37.08967 | 31.57898 | 29.8408  | 30.86205 | 25.77391 | 26.52178 |
| Znrd1        | ENSRNOG00000000779  | 21.11038 | 26.10089 | 21.47277 | 18.71967 | 22.95802 | 19.80573 |
| Mad111       | ENSRNOG00000001265  | 13.11902 | 9.020169 | 8.304874 | 10.77374 | 7.785362 | 6.459928 |
| Wac          | ENSRNOG00000018698  | 44.55518 | 44.91919 | 39.33214 | 40.19162 | 41.64387 | 37.00959 |
| Ccdc106      | ENSRNOG00000015997  | 8.194947 | 12.9768  | 11.53805 | 6.758965 | 10.83171 | 8.809833 |
| Nln          | ENSRNOG00000011561  | 21.53571 | 27.2416  | 25.61211 | 15.2195  | 23.8079  | 21.14831 |
| MGC94199     | ENSRNOG00000049287  | 7.557115 | 7.459655 | 8.285808 | 7.232055 | 6.912439 | 7.666018 |
| Samd4b       | ENSRNOG00000019831  | 11.3897  | 10.62808 | 11.75614 | 7.120645 | 7.653914 | 9.425542 |
| Anp32e       | ENSRNOG00000021168  | 20.56461 | 18.47998 | 17.57597 | 15.36174 | 10.10533 | 12.63901 |
| Rassf1       | ENSRNOG00000021548  | 22.28453 | 26.18846 | 18.99371 | 17.82918 | 18.72581 | 14.42422 |
| Fblim1       | ENSRNOG00000011774  | 19.9256  | 12.21432 | 14.59546 | 14.06861 | 8.820224 | 10.88922 |
| Pank1        | ENSRNOG00000018944  | 3.710426 | 2.401261 | 2.626468 | 3.134577 | 2.074874 | 2.25185  |
| Wbp1111      | ENSRNOG00000005505  | 18.51793 | 13.39751 | 14.15248 | 17.3202  | 12.76459 | 13.03531 |
| Msl3         | ENSRNOG00000004016  | 26.55472 | 26.22089 | 24.35149 | 22.75562 | 24.02172 | 20.15374 |
| Mapk9        | ENSRNOG00000002823  | 18.29318 | 21.98335 | 19.08843 | 17.05393 | 20.3754  | 18.24674 |
| Tpm3         | ENSRNOG00000017441  | 146.8218 | 135.5921 | 90.97134 | 117.2118 | 117.9435 | 72.91866 |
| Uba1         | ENSRNOG00000019164  | 47.43283 | 53.23443 | 47.98488 | 39.4324  | 42.36405 | 42.23616 |
| Rap1b        | ENSRNOG00000007048  | 154.9468 | 199.3003 | 223.7244 | 109.1818 | 125.5002 | 135.2553 |
| Ash2l        | ENSRNOG00000014875  | 63.43282 | 59.21664 | 50.60208 | 42.08038 | 47.13425 | 36.81107 |
| Med20        | ENSRNOG00000013852  | 29.5706  | 28.18975 | 32.14743 | 23.26751 | 24.30846 | 24.63041 |
| Comp         | ENSRNOG00000048472  | 1.075004 | 1.225151 | 1.021873 | 0.674575 | 0.983299 | 0.782292 |
| Mnt          | ENSRNOG00000002894  | 2.051119 | 2.782936 | 3.484547 | 1.916055 | 2.559972 | 3.351669 |
| Gps1         | ENSRNOG00000046698  | 73.65814 | 65.77672 | 61.46983 | 62.09151 | 58.98176 | 54.38668 |
| B3gnt7       | ENSRNOG00000018267  | 0.311362 | 0.924277 | 0.664529 | 0.207161 | 0.806934 | 0.48081  |
| Vwa5b2       | ENSRNOG00000001707  | 0.727937 | 1.056793 | 0.67298  | 0.59013  | 0.816763 | 0.52216  |
| Rapgef3      | ENSRNOG00000059961  | 4.313083 | 3.671336 | 7.901184 | 2.962184 | 2.964766 | 6.900921 |
| Bicd2        | ENSRNOG00000016031  | 34.12909 | 26.47407 | 24.52077 | 32.90113 | 24.78545 | 23.63231 |
| Hist1h2ba    | ENSRNOG00000016865  | 4.283245 | 0.750998 | 1.134217 | 3.774323 | 0.425854 | 0.50094  |
| Nemp2        | ENSRNOG00000012924  | 4.076281 | 2.690639 | 2.824159 | 3.547276 | 2.392584 | 2.250127 |

|              |                    |          |          |          |          |          |          |
|--------------|--------------------|----------|----------|----------|----------|----------|----------|
| Atp10a       | ENSRNOG00000056228 | 28.71503 | 23.41934 | 21.45229 | 26.54824 | 20.17217 | 19.67403 |
| Oscp1        | ENSRNOG00000026978 | 6.471098 | 6.720809 | 6.167932 | 4.548148 | 5.663935 | 4.151619 |
| AABR07061825 | ENSRNOG00000011606 | 3.120787 | 3.073113 | 2.85616  | 2.808124 | 2.887754 | 2.66808  |
| .1           |                    |          |          |          |          |          |          |
| Abcb8        | ENSRNOG00000008557 | 11.79031 | 12.03676 | 11.4914  | 11.42284 | 11.41599 | 11.11788 |
| Osbp12       | ENSRNOG00000057756 | 12.30599 | 11.26981 | 10.91187 | 11.03996 | 9.65028  | 10.08087 |
| Stau1        | ENSRNOG00000007781 | 16.07845 | 15.76472 | 15.93281 | 11.87327 | 12.93525 | 13.65047 |
| Arid5a       | ENSRNOG00000015382 | 1.934572 | 2.097884 | 1.78222  | 0.943517 | 1.442397 | 1.239014 |
| Dhps         | ENSRNOG00000004219 | 25.84441 | 26.2318  | 21.62249 | 23.91619 | 24.91896 | 20.58679 |
| Ap4b1        | ENSRNOG00000019455 | 10.32287 | 11.50986 | 10.02345 | 8.529845 | 10.37415 | 9.01412  |
| Rhbd13       | ENSRNOG00000005515 | 0.688547 | 0.388266 | 0.677971 | 0.559057 | 0.245519 | 0.449955 |
| AABR07027567 | ENSRNOG00000018381 | 7.73821  | 8.584182 | 7.687165 | 6.69957  | 7.338484 | 7.054437 |
| .1           |                    |          |          |          |          |          |          |
| Nme1         | ENSRNOG00000002693 | 144.9669 | 105.567  | 80.174   | 120.0734 | 88.54516 | 66.8578  |
| Tas1r2       | ENSRNOG00000061876 | 7.470554 | 7.913156 | 7.163553 | 6.147267 | 7.152823 | 6.348618 |
| Gipc1        | ENSRNOG00000003864 | 67.36582 | 61.22213 | 49.2932  | 55.72016 | 47.57895 | 42.37374 |
| Dusp3        | ENSRNOG00000036798 | 9.742493 | 9.23511  | 8.055783 | 7.929235 | 6.470521 | 6.542951 |
| Gemin5       | ENSRNOG00000002645 | 8.236823 | 8.524502 | 9.233586 | 6.822814 | 6.830336 | 6.648507 |
| Dnajb12      | ENSRNOG00000030408 | 15.35771 | 20.68873 | 17.33981 | 14.21585 | 18.62247 | 15.11576 |
| LOC688583    | ENSRNOG00000011096 | 2.276052 | 1.888001 | 1.187806 | 1.300536 | 1.264945 | 0.645825 |
| Arih1        | ENSRNOG00000009887 | 18.44885 | 19.39362 | 21.81067 | 17.09829 | 16.83588 | 20.03466 |
| Mef2a        | ENSRNOG00000047756 | 28.68202 | 33.65567 | 31.07452 | 21.57023 | 27.29549 | 27.46128 |
| Rassf8       | ENSRNOG00000015986 | 46.17681 | 36.96544 | 40.66203 | 41.65513 | 32.12502 | 38.17712 |
| Depdc5       | ENSRNOG00000018144 | 3.645647 | 3.483947 | 3.247877 | 2.575987 | 2.538386 | 2.705902 |
| Plaur        | ENSRNOG00000037931 | 50.25341 | 54.10757 | 31.20479 | 40.2773  | 44.32617 | 25.99431 |
| Stk11ip      | ENSRNOG00000020107 | 3.971647 | 5.116872 | 4.950103 | 2.49426  | 4.331792 | 3.941794 |
| Psmc4        | ENSRNOG00000018994 | 109.1465 | 104.3401 | 91.15726 | 94.23337 | 96.81274 | 78.25907 |
| Zfp804a      | ENSRNOG00000038004 | 0.036188 | 0.060806 | 0.022605 | 0.022225 | 0.033101 | 0        |
| Gnl3l        | ENSRNOG00000002509 | 26.24471 | 27.4753  | 28.28796 | 21.54229 | 25.03317 | 23.7301  |
| Ap1b1        | ENSRNOG00000008786 | 25.49743 | 22.03827 | 23.19684 | 17.98867 | 18.2351  | 17.33989 |
| Map4k1       | ENSRNOG00000020505 | 0.234448 | 0.12606  | 0.205031 | 0.100792 | 0.014297 | 0        |
| RGD1305455   | ENSRNOG00000039214 | 1.660207 | 2.331081 | 2.015361 | 1.492291 | 2.047316 | 1.681469 |
| Anapc5       | ENSRNOG00000001316 | 230.9775 | 191.6086 | 173.2613 | 200.7712 | 172.362  | 156.558  |
| Hipk1        | ENSRNOG00000019333 | 17.859   | 19.09193 | 21.74421 | 13.28593 | 15.01885 | 19.43367 |
| AABR07066792 | ENSRNOG00000054698 | 2.902297 | 2.117506 | 2.647876 | 2.392261 | 1.67666  | 1.84902  |
| .1           |                    |          |          |          |          |          |          |
| Actn3        | ENSRNOG00000019745 | 0.091269 | 0.061343 | 0.171038 | 0        | 0.013914 | 0.081836 |
| LOC497963    | ENSRNOG00000057443 | 1.179082 | 4.002006 | 1.865876 | 0.609487 | 2.870003 | 0.875139 |
| Polr1b       | ENSRNOG00000018349 | 8.890024 | 9.384978 | 7.261418 | 7.857509 | 8.589314 | 6.740026 |
| Atic         | ENSRNOG00000015511 | 82.36505 | 79.27238 | 68.67399 | 70.42426 | 66.73319 | 62.24106 |
| Lrrc45       | ENSRNOG00000045926 | 15.61443 | 15.07749 | 13.56583 | 12.38498 | 13.19096 | 11.64676 |
| Mamdc4       | ENSRNOG00000016584 | 1.07643  | 1.186963 | 1.281775 | 0.929669 | 0.923065 | 1.115981 |
| Rbm28        | ENSRNOG00000005468 | 5.743628 | 4.639085 | 4.548252 | 4.562811 | 3.998002 | 3.781249 |
| Clcf1        | ENSRNOG00000018752 | 11.94434 | 12.3547  | 10.50139 | 10.59272 | 11.54616 | 8.884269 |
| Rnh1         | ENSRNOG00000016416 | 249.824  | 281.1927 | 213.6575 | 184.1047 | 247.448  | 166.1375 |
| Nucks1       | ENSRNOG00000047287 | 80.89173 | 64.77737 | 51.49518 | 77.0169  | 57.24232 | 44.23618 |
| Tmem170a     | ENSRNOG00000049019 | 1.769098 | 1.685673 | 1.526239 | 1.530382 | 1.381374 | 1.373459 |
| Cyb5d1       | ENSRNOG00000045742 | 8.02651  | 8.477422 | 5.551071 | 7.100891 | 7.633133 | 5.083533 |
| Alkbh2       | ENSRNOG00000028584 | 4.050845 | 4.521504 | 4.168409 | 3.498551 | 4.036107 | 3.8916   |
| Fastk        | ENSRNOG00000011667 | 48.27866 | 34.35909 | 37.92254 | 44.42597 | 32.41728 | 34.9724  |
| Mum1         | ENSRNOG00000024549 | 16.48591 | 11.77292 | 11.97499 | 15.70367 | 10.31759 | 11.02165 |
| Lamb2        | ENSRNOG00000047768 | 25.64864 | 24.0416  | 32.78003 | 23.45769 | 19.92695 | 28.50274 |
| Cnnm4        | ENSRNOG00000015886 | 1.750918 | 1.906818 | 1.965214 | 1.440496 | 1.370312 | 1.645507 |
| RGD1562136   | ENSRNOG00000032398 | 18.29094 | 17.72926 | 15.57638 | 16.51062 | 14.44315 | 12.05957 |
| Pak4         | ENSRNOG00000019883 | 7.717827 | 7.604042 | 6.872047 | 6.453489 | 6.969194 | 5.720906 |
| Ccdc189      | ENSRNOG00000053015 | 2.674605 | 2.281616 | 2.753949 | 2.518097 | 2.070066 | 2.450872 |
| Noc4l        | ENSRNOG00000037478 | 8.847423 | 8.26643  | 7.752899 | 5.579124 | 6.542529 | 5.564257 |



|              |                    |          |          |          |          |          |          |
|--------------|--------------------|----------|----------|----------|----------|----------|----------|
| Ddx27        | ENSRNOG0000000801  | 18.01071 | 17.35267 | 14.40184 | 14.70018 | 12.83651 | 12.11554 |
| Bud13        | ENSRNOG00000018665 | 9.149464 | 9.550735 | 8.345407 | 7.776149 | 6.832174 | 6.352501 |
| Higd1b       | ENSRNOG00000002814 | 0.063795 | 0.321583 | 0.239104 | 0        | 0.233413 | 0.114403 |
| Pdgfrb       | ENSRNOG00000018461 | 205.0545 | 184.3981 | 241.4463 | 184.057  | 164.6593 | 230.8828 |
| Celsr2       | ENSRNOG00000020058 | 0.178035 | 0.087658 | 0.096987 | 0.068657 | 0.011361 | 0.040837 |
| Agk          | ENSRNOG00000011509 | 12.53793 | 12.71246 | 9.603871 | 11.04535 | 10.16018 | 8.121632 |
| Dmap1        | ENSRNOG00000019407 | 14.91432 | 18.61889 | 16.67519 | 14.35829 | 18.04432 | 16.38358 |
| Ccdc86       | ENSRNOG00000020925 | 33.3344  | 36.39092 | 23.34954 | 18.76654 | 25.43867 | 16.08066 |
| Plekhn1      | ENSRNOG00000020295 | 2.578005 | 3.465422 | 2.44486  | 2.029506 | 2.944031 | 1.527024 |
| AABR07005579 |                    |          |          |          |          |          |          |
| .1           | ENSRNOG00000046147 | 8.734615 | 6.182433 | 6.572881 | 6.04541  | 4.84337  | 4.544896 |
| Tmx2         | ENSRNOG00000005308 | 54.36471 | 53.05497 | 35.14825 | 48.8307  | 43.73491 | 29.83238 |
| Bbox1        | ENSRNOG00000059519 | 0.037357 | 0.018831 | 0.052505 | 0        | 0        | 0.016748 |
| Atg2a        | ENSRNOG00000060707 | 3.734401 | 4.26597  | 5.5559   | 3.440268 | 3.750468 | 4.957647 |
| Nol6         | ENSRNOG00000010409 | 4.193116 | 5.375754 | 4.756483 | 2.50173  | 2.144208 | 2.612566 |
| Prom1        | ENSRNOG00000003098 | 0.14757  | 0.092984 | 0.155556 | 0.110457 | 0.042182 | 0.082698 |
| Lama5        | ENSRNOG00000053691 | 24.61726 | 28.17843 | 29.25036 | 18.98468 | 18.66239 | 23.834   |
| Uqcrb        | ENSRNOG00000024967 | 22.54101 | 22.93956 | 20.24412 | 20.29545 | 18.36178 | 16.24526 |
| Ciapin1      | ENSRNOG00000016234 | 37.42721 | 38.75794 | 32.45501 | 30.68943 | 29.41174 | 27.77137 |
| Hmgcl        | ENSRNOG00000009422 | 15.27597 | 24.05256 | 21.77423 | 12.93175 | 19.31378 | 18.21871 |
| Hadha        | ENSRNOG00000024629 | 54.31851 | 65.598   | 62.84479 | 52.88481 | 63.26354 | 59.91201 |
| Zbtb39       | ENSRNOG00000004306 | 3.394218 | 3.141212 | 3.279093 | 2.398892 | 2.32678  | 2.793721 |
| Slc38a7      | ENSRNOG00000012007 | 5.69724  | 7.293326 | 7.114111 | 4.21584  | 6.553671 | 6.040955 |
| Map1s        | ENSRNOG00000018781 | 12.2352  | 11.79342 | 11.28036 | 9.681703 | 8.403043 | 9.608547 |
| Naa20        | ENSRNOG00000010523 | 43.62955 | 59.25609 | 39.75036 | 41.4897  | 55.17185 | 35.45449 |
| Ftsj3        | ENSRNOG00000009857 | 39.63726 | 38.58472 | 32.00877 | 34.39561 | 34.68446 | 29.41991 |
| Sdad1        | ENSRNOG00000022229 | 10.63999 | 12.8626  | 9.473402 | 8.175686 | 9.805722 | 7.9862   |
| Agbl5        | ENSRNOG00000008612 | 2.293521 | 2.366032 | 2.223986 | 1.805772 | 1.866127 | 1.972776 |
| Myo10        | ENSRNOG00000010161 | 8.605485 | 7.223427 | 6.558867 | 5.887304 | 5.073439 | 5.235075 |
| Psmc3ip      | ENSRNOG00000020022 | 23.89722 | 13.49758 | 13.35402 | 19.89307 | 10.3587  | 11.40206 |
| Kif13a       | ENSRNOG00000001455 | 11.25777 | 8.839953 | 10.09779 | 10.17946 | 6.944204 | 8.986863 |
| Slc35a1      | ENSRNOG00000008908 | 22.27108 | 20.6353  | 22.25014 | 19.95069 | 17.95364 | 17.9484  |
| Anks3        | ENSRNOG00000003186 | 5.345924 | 5.399543 | 5.341816 | 3.898092 | 4.37563  | 4.616506 |
| Rpl71l       | ENSRNOG00000016269 | 97.92177 | 112.7143 | 86.21837 | 71.54706 | 91.35107 | 73.4498  |
| Sympk        | ENSRNOG00000014353 | 21.25176 | 21.2439  | 18.96033 | 17.5489  | 18.71242 | 17.0804  |
| Wdr33        | ENSRNOG00000011382 | 14.93281 | 16.56614 | 16.00378 | 12.8835  | 13.88895 | 14.69885 |
| Coq5         | ENSRNOG00000001171 | 16.47802 | 16.44283 | 12.88844 | 10.44767 | 12.6587  | 9.665347 |
| Pear1        | ENSRNOG00000014243 | 12.14028 | 11.44565 | 12.17321 | 10.10446 | 10.45141 | 10.631   |
| Eftud2       | ENSRNOG00000002818 | 8.184168 | 7.854585 | 6.210051 | 7.19239  | 5.957328 | 4.980331 |
| Wrap53       | ENSRNOG00000010520 | 10.18656 | 9.247672 | 9.001934 | 7.44957  | 7.838244 | 6.168498 |
| Mgp          | ENSRNOG00000005695 | 479.1336 | 545.0526 | 580.2148 | 387.3617 | 398.1707 | 391.184  |
| Cycs         | ENSRNOG00000010452 | 78.8474  | 70.55704 | 49.13921 | 69.74777 | 65.31602 | 43.91644 |
| Nin          | ENSRNOG00000005540 | 2.846783 | 3.165583 | 3.03366  | 2.478531 | 2.508594 | 2.646004 |
| Mtmr2        | ENSRNOG00000005923 | 45.88523 | 45.8712  | 38.85568 | 42.09348 | 39.92439 | 35.7296  |
| Irf9         | ENSRNOG00000019478 | 78.70873 | 110.7998 | 110.214  | 55.73181 | 99.02351 | 86.3876  |
| Pkp1         | ENSRNOG00000010076 | 44.50486 | 40.56653 | 23.81126 | 23.97986 | 22.68815 | 13.94927 |
| Aaas         | ENSRNOG00000013445 | 11.42754 | 9.396808 | 7.166982 | 10.3376  | 7.122074 | 5.256681 |
| Pde4d        | ENSRNOG00000042536 | 0.494833 | 0.572239 | 0.586389 | 0.294967 | 0.239622 | 0.404539 |
| Elp1         | ENSRNOG00000016725 | 44.88694 | 44.95863 | 44.88049 | 40.62101 | 42.88832 | 40.94162 |
| Jrk          | ENSRNOG00000027238 | 8.620657 | 8.802036 | 8.833712 | 7.722003 | 7.314831 | 8.025678 |
| Prelp        | ENSRNOG00000003120 | 124.4949 | 126.5688 | 142.5172 | 110.2269 | 119.5727 | 128.7735 |
| Tsn          | ENSRNOG00000002319 | 58.70118 | 45.66808 | 49.53443 | 45.20972 | 38.56675 | 41.07473 |
| Nufip1       | ENSRNOG00000001033 | 12.7358  | 10.9035  | 11.37636 | 12.1329  | 9.662473 | 10.47638 |
| Pak3         | ENSRNOG00000004676 | 1.938157 | 1.680433 | 1.61628  | 1.428401 | 1.223245 | 1.372889 |
| Filip1l      | ENSRNOG00000001645 | 5.48427  | 3.522556 | 3.988738 | 5.093056 | 3.104923 | 3.787215 |
| Colca2       | ENSRNOG00000042165 | 1.701917 | 2.757571 | 2.448987 | 1.063911 | 1.83472  | 1.144509 |
| LOC100912393 | ENSRNOG00000045895 | 1.901431 | 2.550801 | 2.356353 | 1.342004 | 1.977668 | 2.076134 |

|              |                     |          |          |          |          |          |          |
|--------------|---------------------|----------|----------|----------|----------|----------|----------|
| Abr          | ENSRNOG00000056837  | 20.1193  | 21.12694 | 17.34021 | 13.19578 | 14.79616 | 14.03544 |
| Xrcc1        | ENSRNOG00000019915  | 17.05895 | 12.90936 | 15.7079  | 15.38551 | 11.48124 | 14.91811 |
| Naca         | ENSRNOG00000002632  | 44.2644  | 48.81418 | 47.68426 | 41.65934 | 43.95927 | 42.18218 |
| Babam1       | ENSRNOG00000017071  | 46.39721 | 45.13729 | 40.36653 | 37.9204  | 40.62505 | 30.84416 |
| Zc3h12a      | ENSRNOG00000009131  | 29.60116 | 37.68744 | 38.71536 | 24.96061 | 31.81603 | 29.61636 |
| Zwint        | ENSRNOG00000048682  | 65.32271 | 59.68762 | 45.12708 | 50.22514 | 51.55179 | 36.11137 |
| Pigh         | ENSRNOG00000010914  | 7.127741 | 8.358813 | 8.218562 | 6.158068 | 7.786474 | 7.003649 |
| RGD1311847   | ENSRNOG00000023700  | 7.9501   | 11.27476 | 10.87086 | 7.376489 | 10.15978 | 10.16394 |
| LOC103693015 | ENSRNOG00000018291  | 15.98896 | 14.87322 | 12.89652 | 12.83147 | 13.11726 | 11.08483 |
| Cox5a        | ENSRNOG00000018816  | 144.1281 | 166.8514 | 127.1195 | 136.0014 | 155.4508 | 110.5269 |
| Cndp2        | ENSRNOG00000015591  | 54.64161 | 74.50723 | 66.71379 | 42.88469 | 66.73625 | 50.49746 |
| Mylk         | ENSRNOG00000002215  | 21.75623 | 19.19842 | 21.8025  | 16.9696  | 16.64931 | 18.92503 |
| Mybbp1a      | ENSRNOG00000015236  | 45.86997 | 41.98723 | 37.17393 | 37.94285 | 35.82146 | 33.44594 |
| Coil         | ENSRNOG00000000244  | 4.433456 | 5.739471 | 4.15413  | 3.527318 | 5.314837 | 3.43315  |
| Prkd1        | ENSRNOG00000004165  | 1.474741 | 1.669378 | 1.878799 | 0.965311 | 0.662635 | 1.229522 |
| Cd274        | ENSRNOG00000016112  | 6.200405 | 13.27498 | 8.661814 | 4.237297 | 11.23982 | 7.682285 |
| Upp1         | ENSRNOG00000004972  | 16.74956 | 38.08099 | 25.45288 | 13.68945 | 33.05736 | 18.94625 |
| Stip1        | ENSRNOG00000021164  | 100.5875 | 85.00825 | 70.26305 | 88.75032 | 79.43174 | 59.56084 |
| Phf23        | ENSRNOG00000017657  | 22.20645 | 27.17966 | 25.52855 | 19.23713 | 21.21484 | 19.32905 |
| LOC500956    | ENSRNOG00000020580  | 8.725366 | 30.11267 | 19.2217  | 6.400265 | 26.59509 | 14.34724 |
| AABR07037173 | ENSRNOG00000027850  | 0.237846 | 0.799296 | 1.040015 | 0        | 0.290074 | 0.639788 |
| .1           |                     |          |          |          |          |          |          |
| Lzts2        | ENSRNOG00000014969  | 20.39437 | 23.80071 | 22.44838 | 18.62684 | 20.0806  | 18.94261 |
| Sox6         | ENSRNOG00000020514  | 0.028271 | 0.028502 | 0.02649  | 0        | 0        | 0.012675 |
| Cttn         | ENSRNOG00000047280  | 75.35178 | 79.02027 | 74.05386 | 70.40073 | 74.00366 | 71.63074 |
| Mesp2        | ENSRNOG00000014925  | 0.14209  | 0.0955   | 0.088758 | 0.043633 | 0.021661 | 0.042468 |
| RGD1562218   | ENSRNOG00000019169  | 10.81013 | 10.78858 | 10.22094 | 7.669797 | 8.821406 | 8.618015 |
| Pih1d1       | ENSRNOG00000020634  | 16.4753  | 17.43524 | 13.58354 | 12.69518 | 15.06984 | 11.65281 |
| LOC100911361 | ENSRNOG00000027006  | 8.82627  | 8.280436 | 8.117026 | 6.098314 | 4.522558 | 6.338536 |
| AABR07014804 | ENSRNOG00000024829  | 14.95485 | 16.92697 | 14.27054 | 14.53765 | 16.02888 | 13.57369 |
| .1           |                     |          |          |          |          |          |          |
| Vgl14        | ENSRNOG00000007822  | 30.59699 | 34.83609 | 45.83245 | 21.80806 | 28.26766 | 32.48106 |
| Gtf2h4       | ENSRNOG00000000831  | 6.356086 | 5.006979 | 5.720816 | 5.708549 | 3.917588 | 5.147609 |
| Srpk1        | ENSRNOG00000000511  | 24.29199 | 20.88481 | 16.48023 | 22.93575 | 17.98437 | 14.36074 |
| Dcaf5        | ENSRNOG00000004556  | 14.94347 | 15.45885 | 15.00904 | 13.69313 | 13.93813 | 14.31268 |
| Adgb         | ENSRNOG00000042741  | 0.25549  | 0.835556 | 0.554691 | 0.17222  | 0.723885 | 0.502866 |
| Asb5         | ENSRNOG00000042630  | 0.300394 | 0.359632 | 0.387018 | 0.190254 | 0.188903 | 0.151507 |
| AABR07035428 | ENSRNOG00000001107  | 5.341402 | 6.606856 | 7.570393 | 3.762886 | 5.173139 | 6.841899 |
| .1           |                     |          |          |          |          |          |          |
| Popdc2       | ENSRNOG00000058752  | 0.491947 | 0.813384 | 0.811276 | 0.326304 | 0.44998  | 0.511677 |
| Pla2g16      | ENSRNOG00000021206  | 28.36828 | 56.76593 | 43.93172 | 17.45566 | 33.97401 | 20.94747 |
| Nfya         | ENSRNOG00000012702  | 7.945659 | 7.141502 | 8.229354 | 6.307026 | 4.502403 | 6.900379 |
| Hspa11       | ENSRNOG00000047966  | 0.655362 | 0.403771 | 0.494668 | 0.586973 | 0.266424 | 0.408073 |
| Pqbp1        | ENSRNOG00000007766  | 32.70327 | 30.52545 | 26.2702  | 29.48429 | 27.82959 | 24.80936 |
| Dctn5        | ENSRNOG00000018048  | 33.2805  | 37.48557 | 31.68103 | 21.58859 | 32.14072 | 22.70179 |
| Max          | ENSRNOG00000008049  | 12.18956 | 17.3024  | 14.82329 | 9.972741 | 12.45788 | 10.43646 |
| LOC690468    | ENSRNOG00000048701  | 618.6487 | 551.8248 | 494.0007 | 608.5351 | 547.08   | 486.9114 |
| Cdipt        | ENSRNOG00000024144  | 58.42192 | 61.97799 | 55.62153 | 43.62766 | 54.70585 | 39.83007 |
| Clca4l       | ENSRNOG00000036877  | 0.121355 | 0.061173 | 0.099495 | 0.027949 | 0        | 0.054406 |
| Pml          | ENSRNOG00000008400  | 38.62688 | 50.86511 | 45.15315 | 18.48737 | 39.49934 | 34.30924 |
| Acp2         | ENSRNOG00000013594  | 26.30106 | 28.15966 | 35.33778 | 18.02391 | 23.46871 | 24.94837 |
| Hnrnpa2b1    | ENSRNOG00000011175  | 98.49889 | 103.2807 | 82.24362 | 78.21048 | 63.22148 | 57.95774 |
| Greb1        | ENSRNOG00000024651  | 0.417064 | 0.289785 | 0.29045  | 0.228452 | 0.159812 | 0.202139 |
| Dcp1a        | ENSRNOG00000016015  | 5.500798 | 6.708431 | 6.462331 | 4.606217 | 5.253623 | 5.735017 |
| Rpp25        | ENSRNOG00000018812  | 6.940062 | 7.156505 | 7.690537 | 4.262294 | 5.565393 | 4.176919 |
| RGD1304624   | ENSRNOG00000006986  | 4.805723 | 4.408142 | 3.949301 | 4.173189 | 3.567052 | 3.5673   |
| AC128303.1   | ENSRNOG000000054663 | 0.612078 | 0.514232 | 0.286757 | 0        | 0.093311 | 0        |

|              |                    |          |          |          |          |          |          |
|--------------|--------------------|----------|----------|----------|----------|----------|----------|
| Neurl4       | ENSRNOG00000016109 | 7.479442 | 8.339658 | 7.016106 | 6.020306 | 6.124088 | 5.957873 |
| Trnaulap     | ENSRNOG00000055344 | 21.4288  | 16.63974 | 16.90449 | 13.77152 | 11.99826 | 13.05067 |
| Plk3         | ENSRNOG00000018484 | 3.883583 | 3.34279  | 3.123962 | 2.261377 | 2.396118 | 2.283132 |
| Scarb1       | ENSRNOG00000000981 | 15.32246 | 14.76536 | 12.35717 | 11.19018 | 12.6027  | 9.973448 |
| Cep44        | ENSRNOG00000010566 | 13.1683  | 12.76745 | 11.26229 | 11.51166 | 11.58366 | 10.50093 |
| Tyro3        | ENSRNOG00000058586 | 8.15135  | 6.394366 | 6.988459 | 6.816822 | 5.339515 | 4.844482 |
| Nyx          | ENSRNOG00000009646 | 0.022204 | 0.04477  | 0.062414 | 0        | 0.02031  | 0.019909 |
| Hnrnpm       | ENSRNOG00000007921 | 56.43305 | 64.08644 | 51.99748 | 49.96317 | 54.17792 | 47.26754 |
| Jun          | ENSRNOG00000026293 | 16.13685 | 29.99494 | 20.60271 | 9.345001 | 15.93953 | 11.64887 |
| Epb4112      | ENSRNOG00000012346 | 23.80996 | 18.46725 | 17.2867  | 17.50732 | 11.67772 | 14.22396 |
| Ccdc112      | ENSRNOG00000003559 | 4.060946 | 4.829475 | 3.287892 | 2.433526 | 3.263727 | 2.545317 |
| Rgs3         | ENSRNOG00000024501 | 15.85422 | 11.86145 | 9.424035 | 11.14174 | 9.608119 | 6.384363 |
| Myadm        | ENSRNOG00000053450 | 22.25033 | 13.14345 | 9.899064 | 17.56956 | 8.23078  | 7.66907  |
| Dab2ip       | ENSRNOG00000055226 | 10.03951 | 7.269999 | 7.629231 | 7.268732 | 4.751631 | 6.390438 |
| Ppm1n        | ENSRNOG00000058133 | 2.464435 | 5.3298   | 4.767308 | 1.977382 | 4.981057 | 4.027388 |
| Ccl4         | ENSRNOG00000011406 | 1.317763 | 1.608219 | 0.974793 | 0.19168  | 0.888151 | 0.435312 |
| Gosr2        | ENSRNOG00000003506 | 41.50578 | 38.46239 | 36.30066 | 37.07031 | 35.2243  | 34.30216 |
| Sdhc         | ENSRNOG00000003163 | 86.99348 | 92.12399 | 87.12052 | 54.82078 | 77.48014 | 64.32949 |
| Hgs          | ENSRNOG00000036696 | 33.98009 | 37.32632 | 33.36106 | 27.91061 | 34.57902 | 29.00021 |
| Klhl23       | ENSRNOG00000007981 | 2.937375 | 2.428991 | 2.69819  | 2.219543 | 2.045286 | 2.300855 |
| Hnrnpf       | ENSRNOG00000014562 | 234.581  | 202.8331 | 162.924  | 213.5269 | 190.1522 | 152.4451 |
| Hsh2d        | ENSRNOG00000023614 | 3.760645 | 10.18466 | 7.686522 | 1.409554 | 8.127455 | 3.652952 |
| Zfp46        | ENSRNOG00000049975 | 8.284065 | 8.292929 | 11.05102 | 6.93292  | 7.58627  | 10.28739 |
| Dtx3l        | ENSRNOG00000023400 | 25.33822 | 54.83972 | 48.92579 | 20.91645 | 52.87996 | 45.53439 |
| Prkag3       | ENSRNOG00000017248 | 0.271328 | 0.209181 | 0.478556 | 0.13233  | 0.145989 | 0.34346  |
| Pdk4         | ENSRNOG00000009565 | 1.140691 | 1.346354 | 0.860272 | 0.768912 | 0.534415 | 0.299354 |
| Zfp511       | ENSRNOG00000018272 | 12.23228 | 14.6106  | 12.43634 | 11.5332  | 13.45279 | 10.87149 |
| Rbm38        | ENSRNOG00000006420 | 2.642917 | 2.011443 | 1.820884 | 1.623168 | 1.113926 | 1.370739 |
| Tmem59       | ENSRNOG00000009778 | 90.60912 | 108.8676 | 125.4116 | 75.98238 | 84.94681 | 92.74502 |
| Ror2         | ENSRNOG00000053232 | 1.443244 | 1.186413 | 1.830824 | 0.961381 | 0.974861 | 1.433436 |
| Epas1        | ENSRNOG00000021318 | 4.181576 | 7.278455 | 12.41575 | 2.732773 | 4.895491 | 9.173162 |
| Ythdf3       | ENSRNOG00000010084 | 27.87161 | 32.00111 | 29.55418 | 26.86156 | 29.8153  | 27.34529 |
| Gdpd3        | ENSRNOG00000019685 | 0.530468 | 0.356534 | 0.289944 | 0.244343 | 0.161738 | 0.158547 |
| Akr1a1       | ENSRNOG00000016727 | 488.5944 | 437.4083 | 415.6592 | 236.9447 | 300.8498 | 279.8808 |
| Ripk3        | ENSRNOG00000020465 | 79.5483  | 124.2973 | 61.18172 | 47.04278 | 86.63889 | 44.68926 |
| Xrn2         | ENSRNOG00000011785 | 35.16786 | 40.00869 | 37.73881 | 33.84416 | 38.91208 | 35.52511 |
| Clpp         | ENSRNOG00000047052 | 27.67953 | 31.24573 | 27.83822 | 23.48111 | 28.73966 | 22.18347 |
| Hdac1        | ENSRNOG00000009568 | 50.05597 | 44.49429 | 45.96377 | 47.41717 | 39.37303 | 39.92359 |
| Nrp1         | ENSRNOG00000010744 | 36.0936  | 30.54357 | 40.58052 | 29.11516 | 24.15001 | 37.49816 |
| Idh3a        | ENSRNOG00000010277 | 20.74323 | 18.58109 | 16.06913 | 11.73443 | 12.80642 | 11.81995 |
| Sf3b4        | ENSRNOG00000021181 | 16.32927 | 13.98752 | 11.95683 | 12.07132 | 9.426561 | 9.931662 |
| LOC100911456 | ENSRNOG00000024139 | 16.63016 | 18.9966  | 14.87617 | 15.40991 | 18.41391 | 13.5597  |
| Nsrp1        | ENSRNOG00000022502 | 4.742467 | 5.700676 | 5.041858 | 3.600771 | 5.148278 | 3.785013 |
| RGD1304587   | ENSRNOG00000002944 | 15.11833 | 14.5094  | 15.23554 | 11.1548  | 12.75272 | 11.50842 |
| Trappc3l     | ENSRNOG00000031290 | 0.10026  | 0.151619 | 0.046972 | 0        | 0.045854 | 0        |
| LOC100910554 | ENSRNOG00000051758 | 11.5812  | 5.83791  | 3.860644 | 10.87421 | 4.278042 | 2.795747 |
| Als2cl       | ENSRNOG00000033921 | 8.480248 | 10.46314 | 9.624073 | 5.654764 | 8.778931 | 8.235111 |
| Cer1         | ENSRNOG00000006715 | 1.137948 | 2.987617 | 0.821903 | 0.45864  | 2.168486 | 0.467653 |
| AABR07005779 | ENSRNOG00000018518 | 4.247099 | 3.803087 | 5.363693 | 3.548058 | 2.364656 | 4.494067 |
| .l           |                    |          |          |          |          |          |          |
| Mrpl20       | ENSRNOG00000018647 | 54.89188 | 50.68989 | 42.30294 | 35.27041 | 39.23913 | 32.5193  |
| Dchs1        | ENSRNOG00000031643 | 0.049246 | 0.037237 | 0.030762 | 0.018903 | 0        | 0.014719 |
| Dnajc28      | ENSRNOG00000002026 | 5.148658 | 5.628493 | 4.446466 | 3.857367 | 4.936402 | 3.754388 |
| Fgfr1        | ENSRNOG00000016050 | 31.67663 | 30.33409 | 40.6554  | 27.55188 | 26.30492 | 33.04569 |
| Lsm7         | ENSRNOG00000019552 | 60.26461 | 59.49119 | 54.28293 | 54.27874 | 54.71347 | 44.38657 |
| Qrs1l        | ENSRNOG00000026049 | 4.153687 | 4.921535 | 4.313285 | 3.392593 | 3.662258 | 3.705175 |
| LOC103694328 | ENSRNOG00000038766 | 11.95216 | 11.36705 | 11.54213 | 9.341453 | 8.705867 | 10.35576 |

|              |                    |          |          |          |          |          |          |
|--------------|--------------------|----------|----------|----------|----------|----------|----------|
| Dcps         | ENSRNOG00000009993 | 22.84105 | 24.59689 | 22.14815 | 20.47511 | 21.48853 | 20.80483 |
| Hoxb4        | ENSRNOG00000008191 | 2.705747 | 3.528689 | 3.41913  | 2.14961  | 3.133394 | 2.559634 |
| Nr1d1        | ENSRNOG00000009329 | 4.63561  | 7.771827 | 7.287506 | 3.463845 | 5.873406 | 6.388672 |
| Ppp1r36      | ENSRNOG00000038480 | 19.21831 | 14.71693 | 16.90441 | 15.40003 | 13.05627 | 14.09168 |
| Lbh          | ENSRNOG00000039902 | 49.42267 | 34.80244 | 39.76904 | 35.01638 | 26.91689 | 21.39611 |
| Mrps28       | ENSRNOG00000032630 | 10.97574 | 13.38388 | 13.90819 | 9.533471 | 11.25054 | 10.7161  |
| Capza1       | ENSRNOG00000013538 | 63.64507 | 55.21273 | 53.97432 | 38.36181 | 41.90937 | 40.31887 |
| RT1-N3       | ENSRNOG00000000795 | 57.90817 | 94.38509 | 66.65222 | 47.02122 | 87.4694  | 51.01239 |
| Med6         | ENSRNOG00000006976 | 22.76835 | 20.59799 | 14.76378 | 19.08172 | 18.35641 | 13.00784 |
| Rhbdd2       | ENSRNOG00000001443 | 14.83063 | 13.31644 | 11.10458 | 13.51004 | 10.59802 | 8.014283 |
| Aen          | ENSRNOG00000018421 | 53.16916 | 59.21862 | 49.56008 | 46.61982 | 48.49851 | 44.48227 |
| Tmem11       | ENSRNOG00000005377 | 22.85497 | 22.86331 | 18.84521 | 19.96814 | 21.39083 | 17.24035 |
| Clcn3        | ENSRNOG00000010682 | 12.65358 | 16.10807 | 12.03583 | 10.06878 | 12.26467 | 10.31523 |
| Ccdc97       | ENSRNOG00000020675 | 19.70103 | 19.39834 | 18.988   | 16.86465 | 17.58617 | 14.88471 |
| Lig1         | ENSRNOG00000014193 | 9.675867 | 4.118743 | 3.505615 | 8.279898 | 3.527067 | 2.352105 |
| Cxcl10       | ENSRNOG00000022256 | 147.5767 | 561.6301 | 310.3678 | 59.58613 | 353.9535 | 132.3582 |
| Ctsw         | ENSRNOG00000027096 | 2.170095 | 4.436422 | 1.750958 | 1.41608  | 3.556406 | 1.378275 |
| Traf2        | ENSRNOG00000006238 | 30.42309 | 39.90085 | 33.59743 | 27.83211 | 33.88067 | 29.17431 |
| Lin7b        | ENSRNOG00000020746 | 0.140268 | 0.141414 | 0.328576 | 0        | 0        | 0.062885 |
| Dtx2         | ENSRNOG00000001432 | 6.667173 | 9.734793 | 10.12463 | 5.597431 | 8.591858 | 8.039477 |
| Snx6         | ENSRNOG00000005249 | 40.36931 | 43.41391 | 41.98163 | 26.34965 | 37.44298 | 31.3679  |
| Cnih4        | ENSRNOG00000003717 | 33.03954 | 24.35274 | 23.98807 | 24.65005 | 20.77245 | 17.69938 |
| Rpap1        | ENSRNOG00000005483 | 4.870698 | 4.846362 | 5.27905  | 3.398786 | 3.914918 | 4.603566 |
| Cfap52       | ENSRNOG00000037718 | 0.078254 | 0.138063 | 0.146647 | 0        | 0.089473 | 0.035083 |
| Ift52        | ENSRNOG00000007692 | 11.25678 | 10.94343 | 12.1261  | 9.329614 | 9.753651 | 9.389522 |
| Gtf2a1       | ENSRNOG00000004300 | 12.69922 | 13.619   | 11.76658 | 11.84378 | 11.58714 | 10.05493 |
| Tmprss9      | ENSRNOG00000032429 | 0.528754 | 0.446294 | 0.414787 | 0.328514 | 0.326181 | 0.319744 |
| Arl10        | ENSRNOG00000045948 | 14.19662 | 13.29832 | 12.20238 | 9.88607  | 11.45182 | 8.168799 |
| Toe1         | ENSRNOG00000017561 | 9.909154 | 9.077872 | 7.857989 | 8.071459 | 8.296738 | 6.173966 |
| Vps39        | ENSRNOG00000008316 | 14.53538 | 16.64836 | 17.97195 | 13.35426 | 16.13992 | 17.12737 |
| Hexim2       | ENSRNOG00000021287 | 9.879186 | 12.20695 | 11.2605  | 8.601621 | 9.477223 | 8.236953 |
| Cenpa        | ENSRNOG00000032178 | 7.606529 | 6.338035 | 2.766298 | 5.74352  | 4.288955 | 1.899729 |
| Rnd1         | ENSRNOG00000059857 | 35.63101 | 40.91282 | 29.89458 | 19.74488 | 33.43732 | 20.3396  |
| Actr2        | ENSRNOG00000004959 | 102.1238 | 94.34524 | 83.53498 | 90.31408 | 82.31369 | 78.31613 |
| Ywhah        | ENSRNOG00000055471 | 57.82428 | 48.58058 | 31.30464 | 38.76862 | 34.7637  | 23.17637 |
| LOC100909830 | ENSRNOG00000049822 | 3.540151 | 4.215198 | 4.375149 | 2.86771  | 2.875255 | 2.763787 |
| Prrg2        | ENSRNOG00000020517 | 2.884837 | 2.103953 | 2.588055 | 1.498444 | 1.515872 | 1.568511 |
| Dnal4        | ENSRNOG00000015583 | 21.24647 | 25.85897 | 19.5479  | 17.80356 | 23.43432 | 18.07015 |
| Rabep2       | ENSRNOG00000018462 | 11.828   | 11.38557 | 12.44915 | 9.49329  | 10.34473 | 10.00984 |
| Dyrk2        | ENSRNOG00000007821 | 17.58982 | 12.29669 | 13.31177 | 13.56137 | 10.31454 | 11.04644 |
| Csgalnact2   | ENSRNOG00000014713 | 10.68814 | 11.97677 | 9.665126 | 6.974467 | 9.699298 | 7.953824 |
| Rrp7a        | ENSRNOG00000022896 | 2.609446 | 2.980239 | 2.002948 | 1.978132 | 2.307574 | 1.718112 |
| Nrip3        | ENSRNOG00000013290 | 3.957889 | 3.144159 | 1.700183 | 2.726779 | 2.448079 | 1.0982   |
| Fgf13        | ENSRNOG00000042753 | 3.276984 | 2.359826 | 2.263978 | 3.088438 | 1.906202 | 1.909207 |
| Cyp26c1      | ENSRNOG00000030698 | 0.196753 | 0.283373 | 0.131684 | 0.025894 | 0        | 0        |
| Tmem253      | ENSRNOG00000039489 | 5.577712 | 3.460481 | 3.685206 | 3.952611 | 2.550947 | 2.885316 |
| LOC103690054 | ENSRNOG00000020799 | 16.34366 | 17.07274 | 12.13122 | 11.83649 | 11.75241 | 9.93146  |
| LOC680875    | ENSRNOG00000023828 | 0.227343 | 0.592102 | 0.550301 | 0.087265 | 0.259937 | 0.23782  |
| Tmem9        | ENSRNOG00000010204 | 64.11031 | 54.27912 | 60.64643 | 38.56821 | 43.47673 | 42.39354 |
| Hypk         | ENSRNOG00000015703 | 106.9403 | 82.35944 | 70.02614 | 92.935   | 75.6469  | 61.97956 |
| AABR07062138 | ENSRNOG00000030902 | 0.475691 | 0.319718 | 0.148574 | 0.292149 | 0.145037 | 0.071088 |
| .1           |                    |          |          |          |          |          |          |
| Unc45a       | ENSRNOG00000012357 | 15.33449 | 16.18131 | 16.91417 | 13.14991 | 10.98347 | 12.0264  |
| Timp1        | ENSRNOG00000010208 | 398.5444 | 502.0865 | 382.0789 | 261.2409 | 443.0375 | 288.5753 |
| Dbf4         | ENSRNOG00000050482 | 3.168405 | 2.395717 | 0.948361 | 2.371567 | 1.630191 | 0.611588 |
| Rap1gds1     | ENSRNOG00000015987 | 17.05348 | 16.34623 | 13.12109 | 12.84353 | 13.09116 | 11.38235 |
| LOC100911485 | ENSRNOG00000046424 | 38.03572 | 35.72575 | 33.18252 | 36.12843 | 31.21927 | 29.99779 |

|              |                    |          |          |          |          |          |          |
|--------------|--------------------|----------|----------|----------|----------|----------|----------|
| Phf5a        | ENSRNOG00000024170 | 57.14833 | 46.59757 | 33.11505 | 39.06972 | 30.49268 | 25.66577 |
| Sde2         | ENSRNOG00000003247 | 17.38051 | 19.22    | 20.86575 | 14.58554 | 13.07845 | 14.11093 |
| Gltpd2       | ENSRNOG00000026488 | 1.916    | 1.787231 | 1.308712 | 0.742327 | 1.212045 | 0.658287 |
| Tmem248      | ENSRNOG00000000893 | 40.09144 | 35.49841 | 35.54024 | 29.58979 | 30.91024 | 24.65283 |
| Alkbh1       | ENSRNOG00000012264 | 10.33677 | 10.96857 | 9.027171 | 8.659593 | 9.941834 | 8.26614  |
| Nsun2        | ENSRNOG00000017254 | 24.66593 | 21.9472  | 17.84385 | 24.01595 | 20.41419 | 16.78501 |
| Fam136a      | ENSRNOG00000016273 | 27.36926 | 24.68257 | 20.59246 | 23.30688 | 20.30159 | 18.77772 |
| Senp1        | ENSRNOG00000022260 | 12.85837 | 9.711197 | 9.51177  | 10.43245 | 6.871171 | 8.353735 |
| Nme6         | ENSRNOG00000020721 | 17.31749 | 20.19286 | 16.95598 | 15.80511 | 18.51706 | 13.89059 |
| Batf2        | ENSRNOG00000021018 | 10.08614 | 20.96903 | 15.53754 | 4.987083 | 18.86842 | 10.88305 |
| Klrd1        | ENSRNOG00000060246 | 0.276032 | 0.126494 | 0.517281 | 0.023117 | 0.022953 | 0.292502 |
| Pskh1        | ENSRNOG00000019290 | 8.841934 | 9.235402 | 9.822404 | 7.382332 | 7.577622 | 6.828127 |
| Casp6        | ENSRNOG00000052613 | 0.142475 | 0.215459 | 0.400496 | 0.109378 | 0.152041 | 0.319373 |
| Cnot9        | ENSRNOG00000016034 | 20.84292 | 24.31998 | 19.49299 | 17.88908 | 23.1169  | 16.9311  |
| Wdr45        | ENSRNOG00000009749 | 12.50388 | 15.84889 | 15.45165 | 9.828744 | 14.75235 | 13.42538 |
| Mitd1        | ENSRNOG00000018467 | 50.5182  | 87.89385 | 66.26359 | 30.4473  | 78.76734 | 54.14204 |
| Cdkn1a       | ENSRNOG00000000521 | 119.7551 | 101.3202 | 131.83   | 94.52699 | 82.87287 | 90.7759  |
| AABR07028615 | ENSRNOG00000018500 | 5.383545 | 5.014173 | 3.557776 | 3.596473 | 2.44584  | 2.477494 |
| .1           |                    |          |          |          |          |          |          |
| Dsccl        | ENSRNOG00000026502 | 9.857162 | 4.342521 | 3.440907 | 9.386017 | 3.182215 | 2.450972 |
| Zfp473       | ENSRNOG00000026572 | 1.158127 | 0.892862 | 0.459597 | 0.765665 | 0.324031 | 0.219902 |
| Mns1         | ENSRNOG00000057867 | 1.895369 | 1.273903 | 0.341529 | 1.678927 | 1.022427 | 0.239669 |
| LOC100910795 | ENSRNOG00000048193 | 9.060888 | 12.6977  | 9.808242 | 7.544903 | 8.992635 | 7.028114 |
| Fxr1         | ENSRNOG00000051480 | 45.20359 | 49.52844 | 44.40882 | 43.5658  | 47.79959 | 43.6939  |
| Hirip3       | ENSRNOG00000029061 | 26.36986 | 18.25979 | 11.4384  | 20.15832 | 12.86296 | 8.924755 |
| Ptpn         | ENSRNOG00000019587 | 22.62047 | 27.0538  | 9.837427 | 18.84195 | 25.25428 | 7.70908  |
| Tbc1d21      | ENSRNOG00000008737 | 2.057656 | 2.755635 | 2.244555 | 1.471203 | 2.500135 | 1.624686 |
| Pym1         | ENSRNOG00000058130 | 24.9648  | 25.88894 | 22.26459 | 21.23204 | 22.66317 | 15.54105 |
| Apmap        | ENSRNOG00000006795 | 12.34498 | 9.90887  | 10.57621 | 9.020846 | 7.972691 | 9.04162  |
| Ier3         | ENSRNOG00000000827 | 82.64559 | 71.79148 | 53.89673 | 58.43081 | 57.04778 | 43.06639 |
| Tgif1        | ENSRNOG00000015906 | 37.53873 | 56.6407  | 48.64502 | 27.6249  | 50.83986 | 44.08514 |
| Mrpl19       | ENSRNOG00000006968 | 16.88399 | 16.53127 | 17.81967 | 13.00203 | 14.62183 | 13.05772 |
| Enkd1        | ENSRNOG00000024364 | 0.769783 | 0.632355 | 0.801426 | 0.630358 | 0.31294  | 0.460147 |
| Tsr1         | ENSRNOG00000002980 | 17.07824 | 15.81087 | 14.9971  | 15.81182 | 13.06844 | 13.40639 |
| Gnb2         | ENSRNOG00000001409 | 102.9684 | 112.2318 | 93.40043 | 90.63794 | 95.02254 | 86.3335  |
| LOC103690064 | ENSRNOG00000045593 | 11.2266  | 14.67316 | 11.6531  | 7.524532 | 12.1751  | 10.09639 |
| Cdt1         | ENSRNOG00000013970 | 6.645654 | 3.92144  | 1.593367 | 4.663692 | 2.091799 | 0.788662 |
| Anp32b       | ENSRNOG00000009266 | 15.91698 | 18.33478 | 15.12677 | 11.52757 | 7.353704 | 5.929646 |
| Ezr          | ENSRNOG00000018524 | 33.57085 | 33.7555  | 20.55867 | 24.17087 | 26.12671 | 16.80399 |
| Dennd4b      | ENSRNOG00000022373 | 4.199676 | 4.812197 | 4.775834 | 3.621765 | 3.875259 | 4.362799 |
| Pcif1        | ENSRNOG00000016870 | 7.526853 | 7.377559 | 8.37242  | 7.3091   | 7.23705  | 8.04145  |
| Gtf2h3       | ENSRNOG00000001035 | 11.02917 | 11.05646 | 10.95707 | 8.935865 | 10.2213  | 9.256019 |
| Pa2g4        | ENSRNOG00000004904 | 33.59376 | 27.11699 | 22.59903 | 26.13542 | 15.50378 | 17.61454 |
| Hist3h2ba    | ENSRNOG00000043419 | 15.00466 | 24.16157 | 8.13617  | 5.183567 | 19.8245  | 2.117731 |
| Pfdn6        | ENSRNOG00000000473 | 25.56924 | 31.29884 | 28.01338 | 21.07368 | 23.26682 | 16.94738 |
| Mbd1         | ENSRNOG00000024104 | 20.56853 | 21.989   | 20.93549 | 15.17187 | 18.99245 | 18.37897 |
| Alg8         | ENSRNOG00000012292 | 11.81792 | 9.2619   | 7.827354 | 9.897369 | 7.921817 | 7.038091 |
| LOC103689996 | ENSRNOG00000046031 | 15.29339 | 32.13623 | 25.25988 | 12.60811 | 27.5117  | 18.69265 |
| Med18        | ENSRNOG00000047303 | 17.11269 | 9.828264 | 7.42582  | 12.79278 | 5.645291 | 5.659659 |
| Ssrp1        | ENSRNOG00000008825 | 43.01861 | 36.31599 | 27.90782 | 33.58822 | 23.4356  | 22.71118 |
| Atp8b2       | ENSRNOG00000020822 | 71.25714 | 60.9474  | 60.83609 | 46.07402 | 47.571   | 48.47843 |
| Rasl11a      | ENSRNOG00000000956 | 0.583515 | 0.588282 | 0.771883 | 0.284588 | 0.439548 | 0.615534 |
| Svop         | ENSRNOG00000000693 | 0.18057  | 0.231694 | 0.246099 | 0.105858 | 0.090091 | 0.058875 |
| Ccp110       | ENSRNOG00000027405 | 7.099706 | 5.747857 | 4.502125 | 5.045773 | 4.206374 | 3.68129  |
| Pex5         | ENSRNOG00000049203 | 8.189833 | 10.09905 | 10.23595 | 7.864262 | 9.614091 | 10.03432 |
| Ube2a        | ENSRNOG00000039985 | 8.961827 | 9.035043 | 8.187264 | 7.269836 | 7.741913 | 5.312396 |
| Mlst8        | ENSRNOG00000009667 | 5.055721 | 5.807669 | 4.851064 | 3.269219 | 5.024624 | 3.759485 |

|              |                    |          |          |          |          |          |          |
|--------------|--------------------|----------|----------|----------|----------|----------|----------|
| Ccdc89       | ENSRNOG00000048071 | 0.104034 | 0.244729 | 0.324931 | 0.031947 | 0.063439 | 0.186562 |
| Mrps10       | ENSRNOG00000022609 | 7.252455 | 5.878038 | 4.563658 | 5.141926 | 4.422513 | 3.697705 |
| Impdh2       | ENSRNOG00000031965 | 109.449  | 88.43069 | 99.25075 | 107.0272 | 83.45537 | 96.60441 |
| Ptx3         | ENSRNOG00000012280 | 5.413583 | 4.17362  | 6.543105 | 3.394644 | 2.642329 | 3.120461 |
| Psm13        | ENSRNOG00000014109 | 89.70419 | 80.84184 | 65.11842 | 76.98214 | 69.74658 | 60.11174 |
| Pycr2        | ENSRNOG00000003267 | 31.90699 | 36.87246 | 33.88803 | 28.59406 | 31.07121 | 31.23655 |
| AABR07011031 | ENSRNOG00000059120 | 9.205933 | 4.140818 | 1.990597 | 7.306574 | 3.368241 | 0.126991 |
| .1           |                    |          |          |          |          |          |          |
| Paics        | ENSRNOG00000002101 | 54.036   | 49.98448 | 46.83153 | 43.62161 | 45.8595  | 37.3622  |
| Kpna6        | ENSRNOG00000000127 | 36.76291 | 33.47771 | 35.04302 | 23.96925 | 28.0109  | 27.00498 |
| Kbtbd4       | ENSRNOG00000009397 | 6.698309 | 5.886755 | 6.880128 | 4.047854 | 4.805059 | 5.060441 |
| RGD1310127   | ENSRNOG00000020144 | 8.536728 | 6.152417 | 8.593172 | 8.195978 | 5.864204 | 7.977171 |
| Gpr151       | ENSRNOG00000027103 | 1.098011 | 0.853957 | 0.79367  | 0.895925 | 0.774779 | 0.618844 |
| Ddc          | ENSRNOG00000004327 | 0.016839 | 0.016976 | 0.007889 | 0        | 0.007701 | 0        |
| Shcbp11      | ENSRNOG00000002691 | 0.126851 | 0.063944 | 0.099049 | 0.11686  | 0.038677 | 0.075827 |
| AABR07045405 | ENSRNOG00000059487 | 28.5679  | 25.94159 | 35.69067 | 16.05199 | 20.75642 | 27.43188 |
| .1           |                    |          |          |          |          |          |          |
| Rexo4        | ENSRNOG00000027867 | 37.01926 | 34.8987  | 31.42245 | 32.40434 | 33.06031 | 28.08129 |
| Ttc8         | ENSRNOG00000004542 | 7.987412 | 7.621944 | 7.17088  | 7.478085 | 7.000196 | 6.928678 |
| Abhd17b      | ENSRNOG00000012514 | 10.83029 | 10.52627 | 9.169625 | 10.56416 | 9.92258  | 8.489107 |
| S100a11      | ENSRNOG00000010105 | 416.4172 | 378.2235 | 206.2741 | 363.3927 | 295.5769 | 171.6268 |
| Mxd1         | ENSRNOG00000017720 | 3.505336 | 5.928898 | 5.881309 | 3.060221 | 5.061194 | 4.744856 |
| Tgfb1        | ENSRNOG00000007036 | 12.57103 | 13.37323 | 12.05163 | 10.08947 | 10.89811 | 11.04428 |
| Prkd3        | ENSRNOG00000005289 | 23.00802 | 22.88583 | 22.58795 | 14.6974  | 18.97492 | 18.06847 |
| Fam241b      | ENSRNOG00000000551 | 7.624936 | 10.33307 | 11.2651  | 4.933396 | 9.245235 | 9.412585 |
| Sema4b       | ENSRNOG00000025167 | 17.70781 | 18.82161 | 13.73592 | 13.90108 | 13.9296  | 11.8288  |
| Cxcl16       | ENSRNOG00000026647 | 169.3048 | 285.8946 | 146.4201 | 148.8287 | 274.6004 | 117.9511 |
| Chd4         | ENSRNOG00000018309 | 58.11438 | 59.20568 | 60.14548 | 53.94737 | 49.60005 | 54.36069 |
| Dnajc16      | ENSRNOG00000012503 | 4.706839 | 4.896739 | 5.473762 | 3.628804 | 4.457983 | 4.384977 |
| Fopn1        | ENSRNOG00000053230 | 45.23741 | 37.08601 | 31.00132 | 22.4166  | 25.86146 | 19.25607 |
| Cdc123       | ENSRNOG00000017770 | 55.63509 | 48.78681 | 48.7048  | 52.92137 | 42.14679 | 41.91646 |
| Sike1        | ENSRNOG00000017502 | 8.697437 | 10.71911 | 7.562424 | 8.0124   | 9.303872 | 6.823682 |
| Snx11        | ENSRNOG00000008642 | 10.12623 | 11.71344 | 13.41194 | 6.747495 | 10.34881 | 10.02171 |
| Ccdc25       | ENSRNOG00000015939 | 18.3999  | 17.95316 | 16.62831 | 14.54258 | 15.18646 | 15.10651 |
| Pycr3        | ENSRNOG00000054724 | 34.30684 | 32.9931  | 24.73795 | 27.1251  | 29.60656 | 20.89071 |
| Pdlim3       | ENSRNOG00000012658 | 0.143174 | 0.096229 | 0.089436 | 0.021983 | 0        | 0.042792 |
| Lox13        | ENSRNOG00000061373 | 117.3324 | 209.6374 | 85.00023 | 82.28476 | 166.4923 | 68.43126 |
| Gtf3c4       | ENSRNOG00000054725 | 6.904018 | 6.697644 | 7.439986 | 6.243104 | 6.431356 | 6.994168 |
| Rab27a       | ENSRNOG00000052499 | 7.60466  | 6.298308 | 7.462656 | 5.46896  | 4.741998 | 3.871241 |
| Ifi35        | ENSRNOG00000020678 | 86.17872 | 163.3017 | 119.4198 | 67.15674 | 155.8601 | 101.4532 |
| LOC100912534 | ENSRNOG00000001748 | 12.85209 | 14.68843 | 13.44384 | 10.56398 | 11.19833 | 12.02045 |
| MGC116202    | ENSRNOG00000015625 | 3.075399 | 1.650639 | 1.762151 | 2.955466 | 1.396404 | 1.626747 |
| Ttc4         | ENSRNOG00000042467 | 12.54678 | 12.53036 | 12.00748 | 8.72325  | 10.99581 | 9.423058 |
| LOC103690120 | ENSRNOG00000015799 | 0.223907 | 0.102607 | 0.267018 | 0.056256 | 0.037237 | 0.109508 |
| Tmem82       | ENSRNOG00000011970 | 0.844615 | 0.883053 | 0.937957 | 0.634    | 0.801177 | 0.785367 |
| Sf3a3        | ENSRNOG00000007629 | 22.07459 | 19.22606 | 14.6322  | 16.59139 | 14.6807  | 12.5471  |
| Bcas2        | ENSRNOG00000018783 | 45.12122 | 41.4642  | 37.30226 | 36.74846 | 38.24057 | 31.04137 |
| Fbxw7        | ENSRNOG00000010889 | 3.498666 | 3.002434 | 3.539133 | 3.000048 | 2.712977 | 3.321586 |
| Nrxn2        | ENSRNOG00000021103 | 0.01723  | 0.01158  | 0.032288 | 0.010582 | 0        | 0.015449 |
| RGD1563917   | ENSRNOG00000017273 | 1.064931 | 2.096137 | 0.71274  | 0.280301 | 0.974085 | 0.272818 |
| Diexf        | ENSRNOG00000004789 | 9.642078 | 10.56421 | 9.295861 | 8.679838 | 8.309431 | 7.94807  |
| Speg         | ENSRNOG00000019850 | 0.624198 | 0.640402 | 0.946114 | 0.449879 | 0.557515 | 0.727587 |
| Rhot2        | ENSRNOG00000019930 | 11.46336 | 9.961336 | 10.10759 | 10.31981 | 9.47345  | 9.424286 |
| Tap2         | ENSRNOG00000000455 | 33.44505 | 69.43713 | 54.49477 | 26.78912 | 56.79477 | 37.23462 |
| Zbtb6        | ENSRNOG00000009340 | 3.942175 | 5.732633 | 5.174726 | 3.330432 | 4.453344 | 4.512065 |
| Suox         | ENSRNOG00000005987 | 1.557281 | 1.328465 | 2.431943 | 1.397839 | 1.077456 | 2.040782 |
| Las11        | ENSRNOG00000021748 | 16.48411 | 10.51011 | 9.929276 | 13.34544 | 7.829374 | 8.742474 |

|              |                    |          |          |          |          |          |          |
|--------------|--------------------|----------|----------|----------|----------|----------|----------|
| Rpf1         | ENSRNOG00000015969 | 21.92885 | 24.06895 | 21.75244 | 18.23641 | 22.66946 | 18.90286 |
| Plat         | ENSRNOG00000019018 | 109.7189 | 105.547  | 70.67214 | 51.86286 | 75.91889 | 42.85251 |
| Cbarp        | ENSRNOG00000024349 | 1.970438 | 1.852987 | 2.482409 | 1.754223 | 1.332827 | 1.915248 |
| Fbf1         | ENSRNOG00000008577 | 9.860557 | 8.247958 | 8.346659 | 7.925801 | 7.339477 | 5.93536  |
| Aldh9a1      | ENSRNOG00000004027 | 112.4065 | 103.4278 | 92.91367 | 103.1215 | 98.99603 | 81.1683  |
| Nrg4         | ENSRNOG00000015149 | 0.370878 | 0.467385 | 0.695022 | 0.213541 | 0.381644 | 0.623522 |
| Ncbp2        | ENSRNOG00000001746 | 28.96155 | 28.28647 | 28.8984  | 26.15429 | 27.23102 | 26.54428 |
| Lce1m        | ENSRNOG00000009581 | 0.791862 | 0.159666 | 0.049465 | 0.729493 | 0.048287 | 0        |
| Ddx24        | ENSRNOG00000009166 | 41.51333 | 45.5449  | 46.60467 | 34.22625 | 42.69893 | 41.56411 |
| Zfp518b      | ENSRNOG00000028534 | 3.231031 | 2.576771 | 3.38895  | 2.210195 | 2.150385 | 2.76736  |
| LOC103692716 | ENSRNOG00000059714 | 129.6405 | 103.4079 | 78.74161 | 107.7644 | 81.72963 | 70.20002 |
| Yipf1        | ENSRNOG00000010512 | 38.36501 | 45.1839  | 46.66337 | 32.54759 | 41.34511 | 37.32125 |
| RGD1310429   | ENSRNOG00000000237 | 9.725242 | 11.90036 | 14.92087 | 9.164425 | 11.03463 | 13.54606 |
| Adprh        | ENSRNOG00000027260 | 21.86741 | 20.27657 | 20.43575 | 19.74746 | 19.26505 | 19.34926 |
| Acsl4        | ENSRNOG00000019180 | 20.95808 | 31.5291  | 22.8098  | 15.65924 | 26.03462 | 20.69409 |
| Pde6g        | ENSRNOG00000046962 | 0.497314 | 0.501376 | 0.621308 | 0        | 0.303259 | 0.297275 |
| Tmed5        | ENSRNOG00000000073 | 31.69415 | 40.09705 | 31.30014 | 30.90504 | 38.07437 | 29.27045 |
| Rrn3         | ENSRNOG00000003326 | 32.89212 | 31.87505 | 31.2149  | 21.56537 | 24.99656 | 26.53216 |
| Cstf2t       | ENSRNOG00000050289 | 14.39156 | 17.89831 | 16.49679 | 12.04865 | 11.57028 | 11.22094 |
| Blmh         | ENSRNOG00000003563 | 30.16959 | 27.74978 | 25.36456 | 28.58477 | 25.82398 | 21.82534 |
| Hsp90ab1     | ENSRNOG00000019834 | 423.2289 | 524.1477 | 463.6131 | 394.2879 | 446.0492 | 396.8565 |
| Oser1        | ENSRNOG00000008297 | 34.82729 | 39.73896 | 31.31758 | 30.71625 | 37.93119 | 26.43455 |
| Bysl         | ENSRNOG00000049121 | 21.74079 | 18.71336 | 13.69279 | 17.78466 | 13.03856 | 11.51693 |
| Dnaaf5       | ENSRNOG00000021312 | 4.141344 | 4.034298 | 3.963744 | 2.855518 | 3.555662 | 2.972923 |
| Btg1         | ENSRNOG00000004284 | 57.32372 | 105.1725 | 68.38123 | 48.31377 | 86.08419 | 58.61889 |
| Vps37b       | ENSRNOG00000001086 | 10.2636  | 8.701667 | 7.257464 | 7.967334 | 7.640694 | 6.057333 |
| RGD1560854   | ENSRNOG00000037715 | 4.184413 | 3.831572 | 3.597044 | 2.510948 | 2.774026 | 2.925812 |
| Cdk9         | ENSRNOG00000022586 | 23.26738 | 28.54431 | 24.4715  | 19.02637 | 22.69337 | 22.26899 |
| Tspan31      | ENSRNOG00000025592 | 75.14846 | 79.97521 | 77.9288  | 72.20982 | 73.58743 | 69.95974 |
| Rprd1b       | ENSRNOG00000012923 | 8.353419 | 7.396741 | 7.723828 | 7.108726 | 5.993894 | 7.204489 |
| Cdh11        | ENSRNOG00000013481 | 47.24065 | 45.77578 | 43.57464 | 34.39345 | 40.9511  | 31.49541 |
| Trim26       | ENSRNOG00000032930 | 16.1993  | 20.4079  | 20.87788 | 14.55901 | 18.36294 | 17.15729 |
| Cyp1b1       | ENSRNOG00000040287 | 277.9414 | 242.0444 | 320.4293 | 214.3915 | 218.2191 | 274.1612 |
| LOC103690005 | ENSRNOG00000020781 | 33.33791 | 35.44357 | 30.78312 | 26.8033  | 32.97043 | 24.45725 |
| Srp68        | ENSRNOG00000009351 | 15.94138 | 17.09504 | 16.06432 | 14.47797 | 13.24024 | 12.30473 |
| Arhgef1      | ENSRNOG00000020130 | 10.51962 | 10.01844 | 10.89012 | 9.040422 | 6.528149 | 8.876841 |
| RGD1307554   | ENSRNOG00000018408 | 2.837952 | 2.28891  | 1.983282 | 1.786525 | 0.822021 | 1.431354 |
| Tspan1       | ENSRNOG00000023320 | 0.202475 | 0.379098 | 0.162616 | 0.053294 | 0.158745 | 0.077806 |
| Srpx2        | ENSRNOG00000003715 | 115.8052 | 63.88822 | 42.3445  | 110.8566 | 57.25538 | 39.88059 |
| Rnase10      | ENSRNOG00000010261 | 0.136975 | 0.138094 | 0.320863 | 0        | 0.062645 | 0.122818 |
| Prc          | ENSRNOG00000012933 | 25.04075 | 22.83295 | 22.77472 | 24.07396 | 20.96548 | 20.19417 |
| Timm13       | ENSRNOG00000019682 | 103.9997 | 102.5474 | 90.41761 | 80.78351 | 94.03378 | 69.90136 |
| Tceanc       | ENSRNOG00000004531 | 1.056503 | 1.843501 | 1.865653 | 0.748684 | 1.040712 | 1.05661  |
| Plekhd1      | ENSRNOG00000038297 | 0.104168 | 0.091892 | 0.073204 | 0        | 0        | 0.035026 |
| Figl1        | ENSRNOG00000004440 | 5.629341 | 2.074853 | 0.978366 | 4.614386 | 1.093496 | 0.597017 |
| Cdk2         | ENSRNOG00000006469 | 15.36615 | 9.33525  | 6.095783 | 12.81381 | 5.25705  | 4.473359 |
| Kbtbd6       | ENSRNOG00000047604 | 3.143376 | 2.726863 | 2.990994 | 2.806002 | 1.872239 | 2.075629 |
| Mon1b        | ENSRNOG00000011552 | 9.828907 | 12.33729 | 11.18169 | 6.955968 | 8.911046 | 9.941396 |
| Nhp2         | ENSRNOG00000004247 | 123.7997 | 82.27994 | 50.24195 | 114.6542 | 72.60741 | 46.66415 |
| Preli3b      | ENSRNOG00000046644 | 56.26747 | 44.87149 | 38.14701 | 43.74492 | 39.41754 | 31.29881 |
| RGD1359127   | ENSRNOG00000016399 | 24.33418 | 27.3469  | 22.01391 | 22.09301 | 22.65489 | 19.70519 |
| Pcsk7        | ENSRNOG00000017478 | 18.01137 | 17.18939 | 13.78333 | 15.10126 | 13.89489 | 12.58865 |
| RGD1306502   | ENSRNOG00000022745 | 2.072273 | 2.573142 | 2.084322 | 1.725698 | 1.734858 | 1.595646 |
| Parvb        | ENSRNOG00000055305 | 6.981963 | 6.460139 | 5.821151 | 5.215455 | 5.314958 | 5.137998 |
| Klhl15       | ENSRNOG00000006515 | 2.215638 | 2.672851 | 2.253483 | 1.709662 | 2.130558 | 2.054555 |
| Utp6         | ENSRNOG00000014209 | 53.4562  | 45.20688 | 43.13917 | 38.5804  | 38.75411 | 35.00463 |
| Ppie         | ENSRNOG00000014762 | 30.57841 | 42.07063 | 28.88184 | 26.07013 | 30.66419 | 21.78969 |

|              |                    |          |          |          |          |          |          |
|--------------|--------------------|----------|----------|----------|----------|----------|----------|
| Efcab14      | ENSRNOG00000010091 | 7.28236  | 7.5674   | 8.948668 | 4.797061 | 5.863764 | 8.016836 |
| Nol12        | ENSRNOG00000010209 | 4.467826 | 7.412633 | 4.680783 | 2.398256 | 2.63865  | 2.081881 |
| Tnfaip2      | ENSRNOG00000010165 | 54.89754 | 62.98038 | 47.64809 | 36.15437 | 51.66927 | 40.11874 |
| Ptdc2        | ENSRNOG00000028403 | 3.243654 | 4.308298 | 3.473475 | 3.035605 | 3.767553 | 2.908399 |
| Apol3        | ENSRNOG00000042771 | 7.556101 | 21.5225  | 18.21332 | 5.977626 | 18.52491 | 13.95323 |
| Anks6        | ENSRNOG00000023309 | 5.539342 | 6.731057 | 5.883256 | 4.550323 | 4.428661 | 4.616506 |
| Gkap1        | ENSRNOG00000019272 | 9.862559 | 13.85198 | 10.85327 | 8.572307 | 13.38775 | 9.842668 |
| Mapkapk5     | ENSRNOG00000001345 | 26.76922 | 22.58582 | 20.27069 | 25.68928 | 21.85325 | 19.86485 |
| Col11a2      | ENSRNOG00000000463 | 0.305457 | 0.405937 | 0.286211 | 0.262212 | 0.304799 | 0.230313 |
| LOC103692531 | ENSRNOG00000040303 | 7.564077 | 4.539211 | 5.062506 | 5.475098 | 3.788871 | 3.229655 |
| LOC498265    | ENSRNOG00000059276 | 7.033187 | 4.759666 | 3.295033 | 5.637441 | 3.6725   | 2.793125 |
| LOC100911248 | ENSRNOG00000001868 | 5.986163 | 5.42722  | 6.069029 | 5.054457 | 4.876741 | 4.633769 |
| MGC116121    | ENSRNOG00000015546 | 14.42441 | 17.01403 | 14.01336 | 10.69087 | 15.24962 | 9.123096 |
| Rcor2        | ENSRNOG00000021183 | 6.961594 | 4.937616 | 5.785461 | 5.78484  | 3.999825 | 5.363783 |
| Dxo          | ENSRNOG00000000422 | 4.430943 | 4.370031 | 4.603055 | 3.697417 | 3.113137 | 4.088131 |
| Ints3        | ENSRNOG00000015153 | 21.56397 | 20.84684 | 18.19293 | 16.0326  | 17.99775 | 15.69094 |
| Leo1         | ENSRNOG00000010116 | 9.86175  | 9.239326 | 8.540386 | 8.16733  | 7.760036 | 7.934401 |
| Ncl          | ENSRNOG00000018273 | 45.23819 | 47.02608 | 33.60547 | 35.42929 | 27.48785 | 24.58978 |
| Cpsf2        | ENSRNOG00000005733 | 16.99498 | 16.84107 | 12.21525 | 10.45402 | 9.534007 | 9.599383 |
| RT1-T24-4    | ENSRNOG00000042905 | 132.7335 | 294.0331 | 281.136  | 91.98001 | 279.4541 | 244.7608 |
| Tspan2       | ENSRNOG00000023338 | 3.038662 | 2.107587 | 1.445014 | 2.77828  | 1.379272 | 0.880884 |
| Map3k6       | ENSRNOG00000008936 | 5.40615  | 6.24346  | 3.893661 | 3.893217 | 4.502134 | 3.273793 |
| U2af1        | ENSRNOG00000045860 | 63.73562 | 44.26031 | 42.25675 | 47.05727 | 36.03143 | 34.45389 |
| Xab2         | ENSRNOG00000000988 | 19.4679  | 19.42151 | 18.75539 | 17.29918 | 17.31968 | 17.96171 |
| AABR07043951 | ENSRNOG00000011422 | 4.998585 | 6.168346 | 5.841045 | 4.402819 | 4.793915 | 5.102999 |
| .1           |                    |          |          |          |          |          |          |
| Ccdc82       | ENSRNOG00000005713 | 9.839625 | 8.809744 | 7.51483  | 8.899213 | 7.99291  | 7.18046  |
| Cln1         | ENSRNOG00000016917 | 0.164267 | 0.151809 | 0.089785 | 0.063054 | 0.037564 | 0.049096 |
| Nkx6-1       | ENSRNOG00000002149 | 0.013621 | 0.027464 | 0.012763 | 0        | 0        | 0        |
| Hist1h2aa    | ENSRNOG00000048122 | 0.111358 | 0.224535 | 0.104342 | 0        | 0        | 0        |
| Ubqln4       | ENSRNOG00000019933 | 18.62007 | 15.84632 | 14.22225 | 14.37345 | 12.66215 | 12.70013 |
| Ifit3        | ENSRNOG00000022839 | 149.4168 | 794.8491 | 676.9949 | 58.05989 | 672.8409 | 458.6798 |
| Txndc11      | ENSRNOG00000002452 | 9.271102 | 7.107048 | 7.792931 | 7.622506 | 5.588342 | 7.20193  |
| Cir1         | ENSRNOG00000018719 | 10.9409  | 17.11171 | 12.19663 | 9.291723 | 13.00089 | 9.766281 |
| Mok          | ENSRNOG00000007850 | 3.321105 | 5.562394 | 5.621426 | 2.6154   | 3.846235 | 3.626246 |
| RGD1564855   | ENSRNOG00000059655 | 3.719104 | 3.587872 | 2.944042 | 1.978912 | 2.404747 | 2.299798 |
| Chchd7       | ENSRNOG00000031769 | 26.80096 | 39.33279 | 31.31101 | 22.18977 | 35.06525 | 29.65837 |
| Spef2        | ENSRNOG00000058275 | 0.007529 | 0.02277  | 0.021163 | 0        | 0.006886 | 0.013501 |
| Kpna3        | ENSRNOG00000014945 | 20.03634 | 21.58214 | 17.3511  | 18.12791 | 19.9476  | 16.67949 |
| Tarbp2       | ENSRNOG00000042355 | 13.70405 | 13.78598 | 12.42192 | 12.59723 | 10.9     | 9.322577 |
| Slc16a2      | ENSRNOG00000002832 | 2.705777 | 5.048619 | 5.537301 | 1.512959 | 3.460012 | 4.972933 |
| Cdk14        | ENSRNOG00000040266 | 0.754545 | 0.811423 | 0.848406 | 0.695114 | 0.7822   | 0.766765 |
| LOC108348298 | ENSRNOG00000061236 | 2.254582 | 2.522097 | 2.401921 | 1.849387 | 2.373    | 1.993862 |
| Tbl3         | ENSRNOG00000013429 | 29.17005 | 25.13359 | 21.63601 | 23.31148 | 22.80322 | 18.16963 |
| Naa10        | ENSRNOG00000060063 | 22.39501 | 20.6024  | 14.03307 | 18.86887 | 15.66215 | 12.25737 |
| Oxld1        | ENSRNOG00000047517 | 8.127524 | 9.804695 | 9.372868 | 6.975417 | 8.89561  | 8.969212 |
| Foxj3        | ENSRNOG00000061851 | 12.82679 | 12.08961 | 11.98462 | 11.9085  | 11.34232 | 11.66384 |
| Cacybp       | ENSRNOG00000002572 | 49.73855 | 41.72758 | 33.5169  | 47.26086 | 40.8627  | 31.52352 |
| Tmem63a      | ENSRNOG00000003310 | 17.04301 | 21.21948 | 18.18035 | 16.04101 | 18.43441 | 15.47385 |
| Med21        | ENSRNOG00000001820 | 18.24402 | 19.17102 | 14.77053 | 15.94386 | 18.0489  | 11.61394 |
| Letm1        | ENSRNOG00000016427 | 25.68415 | 27.0056  | 27.72749 | 23.48194 | 21.86165 | 24.99225 |
| G3bp1        | ENSRNOG00000013186 | 52.67134 | 37.18867 | 34.61335 | 37.75567 | 27.64037 | 29.0123  |
| Ly6g6c       | ENSRNOG00000000843 | 0.114865 | 0.231607 | 0.322884 | 0        | 0        | 0        |
| Lrrc10b      | ENSRNOG00000030180 | 0.035609 | 0.0718   | 0.100097 | 0        | 0        | 0        |
| AABR07043407 | ENSRNOG00000060719 | 0.138932 | 0.280134 | 0.390536 | 0        | 0        | 0        |
| .1           |                    |          |          |          |          |          |          |
| Smarca4      | ENSRNOG00000009271 | 32.86199 | 26.41087 | 30.44541 | 21.99023 | 21.72619 | 24.74366 |



|              |                    |          |          |          |          |          |          |
|--------------|--------------------|----------|----------|----------|----------|----------|----------|
| Wdr74        | ENSRNOG00000042878 | 24.14082 | 22.55918 | 18.53675 | 16.82117 | 19.63609 | 14.31061 |
| Cyb5b        | ENSRNOG00000011142 | 32.14078 | 27.47241 | 22.71273 | 21.89749 | 21.97546 | 18.38523 |
| Cenpn        | ENSRNOG00000011296 | 12.40843 | 7.297388 | 3.115346 | 11.37248 | 6.184244 | 2.724427 |
| Sem1         | ENSRNOG00000010420 | 86.82975 | 91.93367 | 73.40835 | 82.50721 | 85.42975 | 71.0286  |
| Spout1       | ENSRNOG00000025711 | 5.942658 | 6.548012 | 5.588945 | 4.009276 | 5.112394 | 4.912466 |
| Efnb1        | ENSRNOG00000006877 | 5.096587 | 4.624403 | 5.84368  | 4.398627 | 4.342846 | 5.0268   |
| Snrnp200     | ENSRNOG00000012157 | 46.31748 | 51.06066 | 50.05987 | 39.724   | 47.62087 | 47.21757 |
| LOC102553386 | ENSRNOG00000053557 | 95.34856 | 82.95501 | 75.65831 | 84.75655 | 77.45522 | 60.31981 |
| Atp6v1e2     | ENSRNOG00000015566 | 1.14703  | 0.489246 | 0.496044 | 0.975402 | 0.322825 | 0.435124 |
| Styx11       | ENSRNOG00000023366 | 4.381702 | 3.690229 | 5.207149 | 3.667386 | 3.152565 | 4.958939 |
| Synj2        | ENSRNOG00000017114 | 8.319618 | 8.948486 | 9.223008 | 7.262198 | 8.471098 | 7.843456 |
| Ccdc65       | ENSRNOG00000058916 | 1.946078 | 2.102118 | 1.866883 | 0.853714 | 0.911223 | 1.454114 |
| Cldnd1       | ENSRNOG00000001657 | 11.93354 | 14.82435 | 13.30763 | 10.89313 | 12.85119 | 10.4067  |
| Ttc9c        | ENSRNOG00000019464 | 41.90827 | 38.48771 | 29.26684 | 32.09244 | 30.26726 | 25.9123  |
| Psm4         | ENSRNOG00000021042 | 116.0483 | 124.7585 | 100.0624 | 103.9503 | 120.1763 | 92.65072 |
| Fgfbp3       | ENSRNOG00000022796 | 1.143648 | 1.383589 | 1.452604 | 0.796031 | 1.208811 | 0.957081 |
| Lzic         | ENSRNOG00000016200 | 11.76641 | 12.05009 | 10.10995 | 8.811676 | 9.599885 | 9.10464  |
| Coa7         | ENSRNOG00000010636 | 6.249692 | 7.364102 | 5.900187 | 4.278204 | 5.975738 | 5.208515 |
| Ngdn         | ENSRNOG00000018069 | 40.37755 | 47.49812 | 39.84639 | 34.78232 | 45.0257  | 37.05303 |
| LOC100910308 | ENSRNOG00000046308 | 33.25709 | 33.44732 | 27.71617 | 24.79305 | 25.79973 | 24.81958 |
| Rnf216       | ENSRNOG00000001101 | 9.292756 | 11.37454 | 11.20775 | 8.866313 | 10.13214 | 10.0667  |
| Pnn          | ENSRNOG00000004061 | 12.50388 | 12.9814  | 10.78578 | 10.733   | 8.911377 | 8.721613 |
| LOC103689986 | ENSRNOG00000020616 | 10.07039 | 8.788868 | 8.356177 | 7.015601 | 6.965767 | 7.187692 |
| Nol10        | ENSRNOG00000005344 | 8.676342 | 8.285224 | 7.142109 | 7.021989 | 4.97409  | 5.684023 |
| Nepro        | ENSRNOG00000013721 | 4.746457 | 5.544127 | 5.211503 | 4.507449 | 4.991827 | 4.930817 |
| Rinl         | ENSRNOG00000025354 | 0.420804 | 0.729165 | 0.455899 | 0.302859 | 0.481133 | 0.341938 |
| Tex101       | ENSRNOG00000020057 | 0.780026 | 0.786399 | 1.192491 | 0.416025 | 0.638381 | 0.993891 |
| Clic3        | ENSRNOG00000015184 | 0.195498 | 0.337877 | 0.628048 | 0.102914 | 0.063864 | 0.388146 |
| Bend3        | ENSRNOG00000046505 | 1.082218 | 0.812728 | 1.510704 | 0.986806 | 0.565656 | 1.227807 |
| Pola2        | ENSRNOG00000020906 | 14.21154 | 6.193026 | 4.091296 | 12.54159 | 4.41912  | 3.483396 |
| Itgb4        | ENSRNOG00000005580 | 0.464541 | 0.546392 | 0.689181 | 0.392289 | 0.430813 | 0.497518 |
| Mtrex        | ENSRNOG00000010125 | 36.72733 | 32.59686 | 28.25385 | 27.5768  | 25.93336 | 25.11598 |
| Cep63        | ENSRNOG00000008410 | 12.42943 | 9.473862 | 9.722532 | 11.82873 | 8.82659  | 9.502073 |
| Tonsl        | ENSRNOG00000014703 | 2.112938 | 0.966384 | 0.53117  | 1.053968 | 0.37711  | 0.110901 |
| Eif3d        | ENSRNOG00000005804 | 126.9699 | 120.576  | 108.015  | 100.9193 | 111.7846 | 88.30104 |
| Slc25a19     | ENSRNOG00000003918 | 6.511023 | 5.904798 | 4.568636 | 5.696915 | 5.139753 | 4.291908 |
| Ppp1r13l     | ENSRNOG00000025350 | 1.200938 | 1.531242 | 1.489333 | 0.634523 | 0.920793 | 1.282673 |
| Tardbp       | ENSRNOG00000012455 | 68.09534 | 62.89968 | 46.50944 | 55.8373  | 46.84521 | 41.10602 |
| Nob1         | ENSRNOG00000021890 | 18.23244 | 24.70091 | 21.75023 | 15.50437 | 17.35778 | 17.27189 |
| Wnk4         | ENSRNOG00000020441 | 0.556317 | 0.540089 | 0.37647  | 0.265741 | 0.216736 | 0.267883 |
| Wdr46        | ENSRNOG00000031171 | 21.77486 | 21.54115 | 17.81615 | 19.71951 | 17.49878 | 16.09009 |
| Prss42       | ENSRNOG00000031971 | 0.019803 | 0.039929 | 0.092774 | 0        | 0        | 0.035512 |
| Zfp263       | ENSRNOG00000007678 | 8.985884 | 8.173258 | 8.100424 | 8.525976 | 7.53028  | 7.880225 |
| Lrrc8e       | ENSRNOG00000028460 | 7.009183 | 6.25675  | 7.456934 | 4.50653  | 5.382779 | 4.936134 |
| Wdr12        | ENSRNOG00000017340 | 29.0316  | 35.30936 | 23.44044 | 22.76168 | 28.4195  | 21.12939 |
| Csnk2b       | ENSRNOG00000000847 | 43.68954 | 42.30452 | 36.03373 | 34.9047  | 38.65301 | 25.05359 |
| Cd68         | ENSRNOG00000037563 | 2.609594 | 5.29738  | 4.26254  | 2.014207 | 3.548209 | 3.003891 |
| Nup93        | ENSRNOG00000018564 | 22.17464 | 14.28606 | 11.63115 | 16.66621 | 9.866191 | 9.802782 |
| Tcof1        | ENSRNOG00000026108 | 9.049491 | 7.279776 | 7.147707 | 6.315117 | 4.215219 | 6.127784 |
| Gnl2         | ENSRNOG00000009430 | 15.66242 | 14.67853 | 12.80764 | 14.4288  | 12.37669 | 11.87573 |
| Fosl1        | ENSRNOG00000020552 | 9.026405 | 10.05527 | 5.572714 | 4.945636 | 6.76398  | 4.223701 |
| Gart         | ENSRNOG00000028292 | 40.74719 | 32.65873 | 23.68582 | 33.63084 | 26.65932 | 21.33655 |
| Map3k11      | ENSRNOG00000020773 | 12.83349 | 11.40435 | 14.15179 | 8.640099 | 9.639657 | 8.823197 |
| Tkfc         | ENSRNOG00000020704 | 15.88716 | 14.28489 | 13.41489 | 13.3084  | 13.43354 | 11.32983 |
| Cyp2j4       | ENSRNOG00000031004 | 0.588646 | 1.506464 | 1.103118 | 0.437998 | 1.09757  | 0.649607 |
| Btbd7        | ENSRNOG00000008598 | 15.12133 | 13.72918 | 16.01354 | 10.95483 | 11.71098 | 14.17591 |
| Sf3b5        | ENSRNOG00000014908 | 82.17966 | 85.70157 | 83.45242 | 68.40237 | 75.33782 | 57.7582  |

|              |                    |          |          |          |          |          |          |
|--------------|--------------------|----------|----------|----------|----------|----------|----------|
| Ppp2ca       | ENSRNOG00000056485 | 75.99806 | 74.24685 | 74.07589 | 62.51245 | 69.73011 | 64.0925  |
| Fam151a      | ENSRNOG00000007799 | 1.750544 | 1.470704 | 1.718359 | 1.401483 | 1.162783 | 1.009036 |
| Ppm1h        | ENSRNOG00000004314 | 2.002848 | 2.896334 | 2.785269 | 1.703167 | 2.694104 | 2.68157  |
| Setmar       | ENSRNOG00000006806 | 2.096132 | 1.947872 | 2.20317  | 1.208995 | 1.517181 | 1.814108 |
| Txlna        | ENSRNOG00000048242 | 44.63681 | 32.59025 | 33.54623 | 43.84986 | 31.85505 | 33.28364 |
| Pln          | ENSRNOG00000000413 | 2.194004 | 2.290227 | 2.110351 | 1.52037  | 1.349733 | 1.793146 |
| Dctn2        | ENSRNOG00000025481 | 129.5283 | 161.2775 | 135.7154 | 124.5556 | 158.3623 | 127.6746 |
| Chrdl2       | ENSRNOG00000018394 | 0.243432 | 0.599916 | 0.278782 | 0        | 0.222665 | 0.145514 |
| LOC100911313 | ENSRNOG00000049007 | 0.975777 | 2.065872 | 1.188588 | 0.719137 | 1.96358  | 1.049908 |
| Aimp1        | ENSRNOG00000011384 | 40.05812 | 37.79002 | 27.30098 | 35.89689 | 34.71429 | 25.91539 |
| Eml2         | ENSRNOG00000030127 | 13.98712 | 21.1119  | 19.33752 | 11.66596 | 14.01934 | 13.27077 |
| Cachd1       | ENSRNOG00000010514 | 3.978508 | 4.530958 | 4.245601 | 3.438905 | 3.122449 | 3.446188 |
| Dkk4         | ENSRNOG00000019267 | 4.578887 | 4.586704 | 5.583017 | 4.191199 | 3.705013 | 5.15835  |
| Epha10       | ENSRNOG00000037340 | 0.243928 | 0.144659 | 0.389896 | 0.158623 | 0        | 0.154388 |
| Sfi1         | ENSRNOG00000018412 | 6.887264 | 5.374739 | 5.961572 | 6.378731 | 4.960617 | 5.795643 |
| Tigar        | ENSRNOG00000051816 | 5.038465 | 5.323841 | 3.661817 | 3.763877 | 4.18028  | 3.243479 |
| Arfgap2      | ENSRNOG00000014429 | 48.45708 | 45.83162 | 43.38347 | 37.17602 | 39.31956 | 39.12656 |
| Slc26a4      | ENSRNOG00000058692 | 0.054314 | 0.054758 | 0.050892 | 0.025018 | 0.01242  | 0.036525 |
| Chchd4       | ENSRNOG00000033038 | 6.251941 | 5.987867 | 5.56514  | 4.799599 | 3.717094 | 4.764894 |
| Chaf1b       | ENSRNOG00000001692 | 12.45778 | 4.750505 | 2.86278  | 11.27835 | 3.247291 | 2.372939 |
| Cdk5rap2     | ENSRNOG00000005788 | 12.37503 | 11.22488 | 9.086968 | 10.79542 | 8.111652 | 7.789831 |
| Spata5       | ENSRNOG00000017462 | 9.606966 | 8.357392 | 7.29361  | 7.367071 | 7.059149 | 6.454547 |
| AABR07054578 | ENSRNOG00000019099 | 5.033991 | 5.658216 | 5.479549 | 3.67053  | 3.879583 | 4.897835 |
| .1           |                    |          |          |          |          |          |          |
| LOC103689945 | ENSRNOG00000009596 | 15.53342 | 12.4116  | 14.28368 | 13.75474 | 11.43721 | 13.58928 |
| Prkar2a      | ENSRNOG00000020284 | 24.86279 | 18.08692 | 15.04413 | 16.2769  | 11.719   | 12.21893 |
| Tjap1        | ENSRNOG00000018980 | 5.989152 | 6.871912 | 6.867786 | 5.622521 | 5.752147 | 6.022217 |
| Lurap1       | ENSRNOG00000023459 | 1.833844 | 2.193522 | 1.68918  | 1.460333 | 1.648973 | 1.504955 |
| Foxp4        | ENSRNOG00000022804 | 1.651851 | 1.433462 | 2.243297 | 1.55064  | 1.185798 | 1.93108  |
| Slc11a2      | ENSRNOG00000019550 | 22.70948 | 29.839   | 27.21022 | 20.45335 | 27.26257 | 21.94354 |
| Pfdn2        | ENSRNOG00000003983 | 3.25536  | 5.081738 | 4.058812 | 2.684551 | 3.409895 | 2.942434 |
| Zyx          | ENSRNOG00000017354 | 33.58402 | 27.30404 | 27.89326 | 26.27358 | 24.91327 | 22.44275 |
| Gbp7         | ENSRNOG00000029191 | 115.7941 | 330.6265 | 167.7153 | 80.97675 | 319.4107 | 137.9679 |
| Lonp1        | ENSRNOG00000046502 | 51.00569 | 58.55941 | 53.80082 | 47.07018 | 47.54862 | 47.03525 |
| Rbm8a        | ENSRNOG00000021215 | 10.27826 | 12.91567 | 9.796255 | 7.678066 | 4.956639 | 3.855373 |
| Ifi44l       | ENSRNOG00000049994 | 19.74618 | 98.14632 | 56.70691 | 9.140858 | 92.08159 | 39.62328 |
| Fam117a      | ENSRNOG00000004417 | 3.688761 | 4.27347  | 3.183483 | 3.293891 | 3.359285 | 2.741744 |
| Hspd1        | ENSRNOG00000014525 | 176.8033 | 145.1024 | 108.5645 | 118.5421 | 95.28529 | 89.86329 |
| Nup88        | ENSRNOG00000006126 | 33.18557 | 31.13357 | 25.41642 | 27.94752 | 26.67023 | 23.73615 |
| RT1-CE7      | ENSRNOG00000031090 | 80.08451 | 105.7324 | 117.7844 | 68.00554 | 101.6592 | 105.5583 |
| Mus81        | ENSRNOG00000020617 | 39.88202 | 31.56424 | 26.35834 | 31.41632 | 27.64272 | 22.56509 |
| Rnf144a      | ENSRNOG00000007370 | 8.779758 | 6.619447 | 8.598733 | 8.407407 | 5.456913 | 7.622272 |
| Cep78        | ENSRNOG00000014041 | 4.976402 | 4.274461 | 3.181523 | 4.501693 | 3.368719 | 2.818987 |
| LOC108348065 | ENSRNOG00000047281 | 14.29762 | 8.778425 | 10.96103 | 11.17194 | 7.572042 | 9.255643 |
| Fcgr2b       | ENSRNOG00000046452 | 0.425923 | 0.620248 | 1.008806 | 0.119893 | 0.476164 | 0.572851 |
| Phka1        | ENSRNOG00000003063 | 4.11206  | 4.537903 | 4.588381 | 3.164027 | 4.215325 | 3.963728 |
| Rgp1         | ENSRNOG00000016309 | 14.0058  | 11.99302 | 11.75991 | 12.39996 | 11.01414 | 11.18822 |
| Ltb          | ENSRNOG00000058566 | 0.133527 | 0.201927 | 0.062557 | 0.092258 | 0.091602 | 0        |
| Arvcf        | ENSRNOG00000001888 | 5.330778 | 4.095286 | 5.660178 | 4.106721 | 3.694281 | 4.477152 |
| Etfb         | ENSRNOG00000017851 | 37.44968 | 29.00916 | 34.45793 | 26.55214 | 25.52589 | 25.8865  |
| Lyrn1        | ENSRNOG00000024530 | 3.629348 | 3.730047 | 4.42419  | 2.012585 | 3.126356 | 2.527556 |
| Drg2         | ENSRNOG00000055309 | 31.41386 | 31.58992 | 30.48322 | 28.46096 | 29.68453 | 25.33598 |
| Zmat3        | ENSRNOG00000010119 | 18.41959 | 18.87958 | 16.52397 | 12.91515 | 15.16344 | 14.68071 |
| Lmnb1        | ENSRNOG00000013774 | 45.7195  | 22.32759 | 13.66877 | 39.67847 | 15.05793 | 11.36288 |
| Spag7        | ENSRNOG00000004246 | 9.510715 | 10.23726 | 9.64854  | 8.728682 | 7.816363 | 7.373586 |
| Men1         | ENSRNOG00000021054 | 12.38842 | 13.82304 | 14.19661 | 10.20777 | 12.44728 | 13.44027 |
| Lrrd1        | ENSRNOG00000026196 | 0.031851 | 0.128446 | 0.074611 | 0        | 0.029134 | 0        |

|              |                    |          |          |          |          |          |          |
|--------------|--------------------|----------|----------|----------|----------|----------|----------|
| Tbrg4        | ENSRNOG00000052477 | 22.08081 | 17.52234 | 16.96016 | 17.51303 | 15.94969 | 14.05445 |
| Sec24c       | ENSRNOG00000009042 | 32.65057 | 28.01931 | 32.6742  | 23.40562 | 24.99562 | 26.14571 |
| Fdxr         | ENSRNOG00000058497 | 4.801871 | 3.954365 | 3.853389 | 4.598855 | 3.848644 | 3.772696 |
| Jpt2         | ENSRNOG00000024661 | 48.92804 | 28.88334 | 19.68184 | 38.71619 | 20.21015 | 16.45515 |
| Mob1a        | ENSRNOG00000059474 | 61.3485  | 61.16861 | 58.90757 | 53.60602 | 58.72314 | 52.48669 |
| AABR07072108 |                    |          |          |          |          |          |          |
| .1           | ENSRNOG00000006943 | 4.349177 | 4.430382 | 3.947811 | 3.881415 | 3.02506  | 2.518529 |
| Cct4         | ENSRNOG00000009642 | 182.6041 | 195.5549 | 154.5801 | 150.3562 | 180.1361 | 140.763  |
| Dlst         | ENSRNOG00000005061 | 50.25175 | 42.81925 | 44.71    | 46.52589 | 39.43966 | 36.86809 |
| Iqce         | ENSRNOG00000001241 | 3.869508 | 4.084272 | 4.08531  | 2.861828 | 2.907967 | 3.713902 |
| 11-Sep       | ENSRNOG00000002182 | 40.12005 | 35.18691 | 25.05512 | 25.90429 | 18.12282 | 19.67552 |
| RGD1563349   | ENSRNOG00000005818 | 0.121819 | 0.061407 | 0.028536 | 0.042084 | 0.013928 | 0        |
| Itfg2        | ENSRNOG00000006264 | 6.556709 | 6.886527 | 6.308661 | 6.382866 | 6.337526 | 5.879026 |
| Zfp64        | ENSRNOG00000012762 | 6.579532 | 8.055974 | 6.826119 | 4.858796 | 6.921796 | 6.247449 |
| Sap18        | ENSRNOG00000010732 | 34.4804  | 25.28681 | 25.93284 | 26.61216 | 22.30935 | 21.6106  |
| Dcaf7        | ENSRNOG00000042245 | 10.24271 | 11.30986 | 11.66133 | 8.196676 | 8.116865 | 10.57365 |
| Rdm1         | ENSRNOG00000020751 | 9.832449 | 8.337851 | 7.577017 | 6.454894 | 6.955387 | 5.891195 |
| Atg2b        | ENSRNOG00000004519 | 7.157279 | 9.385045 | 9.961886 | 6.0886   | 7.856055 | 9.463814 |
| Rassf4       | ENSRNOG00000013526 | 37.1047  | 22.33495 | 23.54632 | 20.19175 | 12.54679 | 17.4076  |
| Cxcl11       | ENSRNOG00000022298 | 11.58779 | 79.84903 | 20.50315 | 7.902681 | 71.13344 | 8.902203 |
| RGD1560917   | ENSRNOG00000034128 | 21.82777 | 21.67927 | 11.74501 | 17.12212 | 17.89006 | 10.2703  |
| Foxk1        | ENSRNOG00000001104 | 4.685592 | 6.314322 | 7.743836 | 4.012864 | 4.163835 | 5.897305 |
| Erh          | ENSRNOG00000004883 | 125.4819 | 115.022  | 87.34975 | 112.6891 | 94.09171 | 80.0482  |
| Acat211      | ENSRNOG00000013975 | 6.230383 | 5.064149 | 3.070422 | 5.34245  | 4.022744 | 2.744888 |
| Paip2b       | ENSRNOG00000014092 | 12.13782 | 14.00455 | 9.414389 | 9.753022 | 10.30054 | 8.162467 |
| RGD1563888   | ENSRNOG00000001554 | 2.020968 | 3.6141   | 2.479765 | 1.75097  | 2.750842 | 1.790514 |
| RGD1561590   | ENSRNOG00000020771 | 128.2551 | 89.51743 | 72.68939 | 97.80084 | 77.36096 | 57.15929 |
| Senp3        | ENSRNOG00000013746 | 25.29332 | 23.85292 | 21.59269 | 22.13254 | 21.69404 | 20.55937 |
| Dbr1         | ENSRNOG00000014588 | 18.4042  | 14.13681 | 10.43066 | 17.86506 | 13.40595 | 10.1988  |
| Zfp1         | ENSRNOG00000019059 | 3.511223 | 4.452256 | 4.205774 | 3.034585 | 4.072556 | 4.057103 |
| Sipa1        | ENSRNOG00000020726 | 14.55827 | 8.706603 | 10.88431 | 12.19663 | 7.67894  | 9.790177 |
| Fmo5         | ENSRNOG00000018076 | 2.305403 | 2.737874 | 3.130391 | 1.529872 | 2.430408 | 2.732807 |
| Stx4         | ENSRNOG00000019302 | 68.23193 | 82.79849 | 70.0539  | 60.8402  | 78.92072 | 58.53881 |
| Ybey         | ENSRNOG00000021365 | 0.574403 | 0.688925 | 0.686686 | 0.41968  | 0.606931 | 0.443995 |
| Gse1         | ENSRNOG00000017489 | 1.409821 | 1.56049  | 1.542701 | 1.153461 | 1.082142 | 0.786751 |
| Tsta3        | ENSRNOG00000009020 | 34.37442 | 37.19643 | 32.65152 | 19.76647 | 31.12503 | 25.56694 |
| Blm          | ENSRNOG00000011213 | 4.955108 | 2.418813 | 1.293777 | 3.888223 | 1.630232 | 0.957081 |
| Actr6        | ENSRNOG00000007875 | 14.9771  | 17.24921 | 18.10081 | 14.10147 | 16.09104 | 15.86455 |
| Dpf2         | ENSRNOG00000020892 | 23.32416 | 27.38064 | 24.03022 | 20.25554 | 18.8406  | 19.11545 |
| Imp4         | ENSRNOG00000013285 | 29.78634 | 30.68746 | 27.20429 | 23.92644 | 28.87503 | 22.07267 |
| Plin2        | ENSRNOG00000007060 | 59.90435 | 108.2865 | 91.73505 | 49.98395 | 97.29932 | 68.39627 |
| Ahdc1        | ENSRNOG00000042855 | 4.44907  | 3.832202 | 5.099648 | 3.839995 | 2.950082 | 4.815474 |
| Cdk19        | ENSRNOG00000000583 | 9.607381 | 12.06915 | 10.05279 | 6.295984 | 8.808595 | 8.994834 |
| Hpf1         | ENSRNOG00000011293 | 21.03265 | 15.14606 | 12.21008 | 16.81865 | 11.23237 | 10.89358 |
| AABR07043601 |                    |          |          |          |          |          |          |
| .3           | ENSRNOG00000049551 | 0.50303  | 0.338093 | 0.314224 | 0        | 0        | 0.150346 |
| LOC100910418 | ENSRNOG00000060898 | 148.5696 | 139.4075 | 94.44277 | 69.45594 | 105.6678 | 57.44239 |
| Arl6ip4      | ENSRNOG00000001080 | 25.25531 | 25.53599 | 27.22238 | 19.2922  | 23.60672 | 21.15737 |
| Gpn1         | ENSRNOG00000004941 | 22.24793 | 16.69742 | 16.70926 | 15.03937 | 14.20365 | 12.35915 |
| Chmp5        | ENSRNOG00000008672 | 81.89096 | 100.5761 | 89.1887  | 63.98738 | 94.9202  | 76.34023 |
| Uba3         | ENSRNOG00000006221 | 50.13104 | 54.08659 | 48.54464 | 47.18815 | 52.8806  | 44.65963 |
| Wdr5         | ENSRNOG00000008212 | 28.93542 | 27.39044 | 21.17864 | 20.18436 | 20.55817 | 18.47945 |
| Cyp2d2       | ENSRNOG00000008988 | 0.052286 | 0.105427 | 0.048992 | 0.024084 | 0.023913 | 0        |
| LOC100911825 | ENSRNOG00000046663 | 0.73981  | 1.003045 | 0.836619 | 0.293767 | 0.583361 | 0.697656 |
| H2afv        | ENSRNOG00000052275 | 35.43096 | 36.97704 | 33.15541 | 33.2995  | 36.08212 | 30.27878 |
| Smtn         | ENSRNOG00000019451 | 33.4546  | 13.19498 | 18.02938 | 22.83431 | 8.4975   | 13.27787 |
| LOC108348069 | ENSRNOG00000047594 | 4.994651 | 5.058494 | 4.245617 | 4.16519  | 3.3473   | 3.544682 |

|              |                    |          |          |          |          |          |          |
|--------------|--------------------|----------|----------|----------|----------|----------|----------|
| Abt1         | ENSRNOG00000017585 | 19.9665  | 20.84732 | 18.89911 | 16.27031 | 19.56552 | 14.71131 |
| Cbfa2t2      | ENSRNOG00000016352 | 5.910358 | 6.620716 | 8.472636 | 5.274203 | 5.467771 | 6.597927 |
| Tceal1       | ENSRNOG00000002387 | 3.656293 | 3.64855  | 5.733191 | 2.784013 | 3.378512 | 4.917583 |
| Rpp30        | ENSRNOG00000018718 | 10.43874 | 8.928545 | 7.414212 | 9.784773 | 7.599622 | 5.403046 |
| Sdhb         | ENSRNOG00000007967 | 85.96419 | 89.41282 | 75.86165 | 61.95597 | 81.49014 | 60.42206 |
| Dclre1b      | ENSRNOG00000019367 | 6.328854 | 3.445059 | 2.851806 | 5.668419 | 2.864328 | 2.650174 |
| Crip1        | ENSRNOG00000027990 | 66.3543  | 50.31524 | 38.0836  | 47.71817 | 43.6615  | 27.45974 |
| Tsks         | ENSRNOG00000020443 | 0.293715 | 0.546674 | 0.46574  | 0.187326 | 0.454654 | 0.243099 |
| Nacc2        | ENSRNOG00000018231 | 19.05099 | 10.62951 | 13.35243 | 10.00218 | 6.633107 | 9.317415 |
| Gtf3c6       | ENSRNOG00000000586 | 9.313789 | 13.57573 | 11.67102 | 8.425142 | 10.64907 | 9.231533 |
| Ahcy         | ENSRNOG00000017777 | 24.80079 | 20.98653 | 16.27076 | 22.25855 | 16.60456 | 14.72944 |
| Luzp1        | ENSRNOG00000022402 | 8.227747 | 6.453888 | 7.543895 | 7.539032 | 5.19101  | 7.078657 |
| Rab20        | ENSRNOG00000023991 | 12.22893 | 17.91115 | 15.09298 | 10.85658 | 17.36088 | 14.41643 |
| Hsd17b11     | ENSRNOG00000002210 | 29.70653 | 51.95443 | 52.29975 | 25.92506 | 49.22163 | 45.09927 |
| Obsl1        | ENSRNOG00000015346 | 13.59434 | 11.62068 | 13.90339 | 11.39998 | 10.84614 | 11.34912 |
| Ddit3        | ENSRNOG00000006789 | 220.947  | 490.6269 | 364.3576 | 159.218  | 460.2396 | 270.4824 |
| Gpkow        | ENSRNOG00000022939 | 12.82128 | 13.079   | 13.4352  | 10.92283 | 11.70771 | 9.814935 |
| Apobec4      | ENSRNOG00000028089 | 0.031148 | 0.094209 | 0.087558 | 0        | 0        | 0.027929 |
| Cbx1         | ENSRNOG00000008689 | 82.27241 | 66.57704 | 70.91591 | 77.95994 | 52.58453 | 57.66496 |
| Mrps14       | ENSRNOG00000002569 | 26.36558 | 25.56859 | 18.8839  | 22.91207 | 23.26197 | 17.77749 |
| Pcmt1        | ENSRNOG00000014330 | 76.57348 | 79.67605 | 50.69433 | 64.50661 | 72.42899 | 46.58352 |
| Extl1        | ENSRNOG00000016776 | 0.22285  | 0.588424 | 1.024163 | 0.146641 | 0.339733 | 0.789754 |
| Ubiad1       | ENSRNOG00000009575 | 8.498029 | 6.698886 | 5.942428 | 7.015628 | 5.777918 | 5.4491   |
| Hint1        | ENSRNOG00000000622 | 209.3235 | 206.5467 | 174.1725 | 201.1732 | 186.1746 | 164.2107 |
| Med9         | ENSRNOG00000053961 | 13.28496 | 12.50216 | 10.22432 | 12.23859 | 10.53428 | 9.49194  |
| Sh2b1        | ENSRNOG00000049181 | 8.627435 | 9.171568 | 10.49836 | 6.859336 | 6.7455   | 9.752632 |
| Ube2d1       | ENSRNOG00000000611 | 1.351523 | 1.362564 | 1.77895  | 0.444669 | 1.089058 | 1.067567 |
| Nppb         | ENSRNOG00000008141 | 7.684678 | 6.368675 | 2.623915 | 3.479709 | 3.216716 | 1.343046 |
| AC098008.1   | ENSRNOG00000018503 | 3.071129 | 5.07436  | 2.797701 | 1.728978 | 2.028823 | 1.453345 |
| Prpsap2      | ENSRNOG00000002724 | 21.6911  | 26.7226  | 23.69699 | 19.34583 | 25.88012 | 20.88114 |
| RGD1559962   | ENSRNOG00000026462 | 8.89165  | 5.112448 | 2.603574 | 5.055578 | 2.287443 | 1.432583 |
| Gtf2f1       | ENSRNOG00000047134 | 54.77442 | 55.32446 | 52.58623 | 45.04874 | 52.38124 | 43.54967 |
| Hscb         | ENSRNOG00000037508 | 16.46869 | 17.01947 | 15.56004 | 12.3401  | 13.8889  | 14.31407 |
| Mcoln2       | ENSRNOG00000015089 | 0.016989 | 0.051383 | 0.031837 | 0        | 0        | 0        |
| Sdhd         | ENSRNOG00000022980 | 83.18669 | 60.86546 | 59.79525 | 49.3383  | 48.13473 | 42.19941 |
| Gtf2f2       | ENSRNOG00000029316 | 18.95012 | 25.74748 | 17.01988 | 16.56657 | 19.32399 | 13.63113 |
| Dpysl3       | ENSRNOG00000018992 | 71.74197 | 64.47067 | 53.77445 | 57.30244 | 31.63535 | 39.38805 |
| LOC102546764 | ENSRNOG00000056435 | 37.54229 | 43.47229 | 30.55371 | 34.98061 | 35.12458 | 24.62137 |
| Fam96a       | ENSRNOG00000017119 | 40.0422  | 37.06775 | 32.11463 | 26.80919 | 31.55445 | 25.99336 |
| Mrpl41       | ENSRNOG00000029875 | 45.00511 | 43.8708  | 36.17861 | 42.31817 | 40.88195 | 29.72244 |
| Fundc1       | ENSRNOG00000003470 | 5.304677 | 6.9042   | 5.255651 | 4.846808 | 6.124846 | 4.990322 |
| Apba3        | ENSRNOG00000020466 | 12.94416 | 13.23634 | 13.57251 | 10.10755 | 12.34736 | 11.66156 |
| Cabin1       | ENSRNOG00000001237 | 7.928426 | 7.609393 | 7.878668 | 6.587286 | 7.146095 | 6.312485 |
| Swap70       | ENSRNOG00000009910 | 16.20246 | 18.69115 | 17.59377 | 13.65731 | 16.35911 | 16.83607 |
| Wdr7         | ENSRNOG00000018387 | 9.513015 | 10.15968 | 12.52793 | 7.009849 | 9.421884 | 10.37585 |
| Sirt6        | ENSRNOG00000006393 | 18.70329 | 22.6432  | 24.46594 | 15.02799 | 21.24054 | 19.73792 |
| LOC102555083 | ENSRNOG00000050661 | 0.109068 | 0.082469 | 0.025549 | 0.025119 | 0        | 0        |
| Rmi1         | ENSRNOG00000019108 | 25.15032 | 16.58905 | 12.67016 | 19.1171  | 12.79701 | 10.7185  |
| Cd80         | ENSRNOG00000001527 | 5.992443 | 4.249881 | 4.551116 | 4.838359 | 3.630083 | 4.13382  |
| Fstl3        | ENSRNOG00000009311 | 12.43467 | 6.791444 | 8.343928 | 11.73157 | 6.372764 | 8.108697 |
| Bcl2l11      | ENSRNOG00000016551 | 3.345476 | 5.252311 | 7.784895 | 2.925132 | 4.453861 | 6.495526 |
| Zfp777       | ENSRNOG00000033639 | 6.64782  | 7.90584  | 6.546644 | 4.820614 | 6.175093 | 6.00037  |
| Psme3        | ENSRNOG00000051344 | 7.224253 | 7.738478 | 6.596733 | 6.223889 | 4.634759 | 4.648259 |
| Atp13a2      | ENSRNOG00000008052 | 3.127948 | 4.827929 | 4.841562 | 2.694576 | 3.401263 | 3.416877 |
| Zfp541       | ENSRNOG00000021800 | 0.037915 | 0.009556 | 0.017763 | 0.008732 | 0        | 0        |
| LOC103694404 | ENSRNOG00000029267 | 1.122143 | 0.282828 | 0.525722 | 0.25844  | 0        | 0        |
| Spry4        | ENSRNOG00000013851 | 0.855764 | 0.584447 | 0.913933 | 0.59339  | 0.479757 | 0.561047 |

|              |                    |          |          |          |          |          |          |
|--------------|--------------------|----------|----------|----------|----------|----------|----------|
| Dnajc7       | ENSRNOG00000017781 | 23.7557  | 21.56858 | 26.50229 | 16.00437 | 19.26523 | 20.77531 |
| Coprs        | ENSRNOG00000000111 | 14.27074 | 16.14578 | 13.74305 | 12.92762 | 11.53045 | 9.881163 |
| Lysmd2       | ENSRNOG00000010642 | 9.419638 | 8.735885 | 7.936703 | 7.287489 | 8.10401  | 6.350906 |
| Trim72       | ENSRNOG00000022099 | 0.036607 | 0.055359 | 0.102902 | 0        | 0.016742 | 0.016412 |
| Ndufaf8      | ENSRNOG00000042653 | 39.3196  | 40.22522 | 34.94135 | 35.33268 | 37.29087 | 27.11306 |
| Enpp4        | ENSRNOG00000010174 | 3.870058 | 13.97785 | 12.86783 | 1.722045 | 8.798234 | 5.68517  |
| mrpl11       | ENSRNOG00000019970 | 21.13824 | 19.11559 | 15.77548 | 20.20724 | 16.12869 | 13.8103  |
| Slc25a32     | ENSRNOG00000004403 | 6.314244 | 5.907032 | 5.809818 | 4.821226 | 5.4634   | 4.369479 |
| Cdc42ep1     | ENSRNOG00000008517 | 5.098986 | 4.682242 | 5.295062 | 4.532816 | 3.11924  | 4.470046 |
| Clca1        | ENSRNOG00000060831 | 0.023967 | 0.036244 | 0.011228 | 0        | 0        | 0        |
| Fbxo34       | ENSRNOG00000011704 | 2.96412  | 3.293811 | 3.024245 | 2.609294 | 2.301558 | 2.492385 |
| Slc35f6      | ENSRNOG00000009459 | 23.03424 | 26.30099 | 25.48966 | 18.01468 | 24.84266 | 21.53544 |
| AABR07071891 | ENSRNOG00000037673 | 87.05559 | 89.28823 | 102.7809 | 77.0708  | 61.85708 | 68.33225 |
| .2           |                    |          |          |          |          |          |          |
| Olr1         | ENSRNOG00000056219 | 5.702247 | 6.204534 | 3.420811 | 4.057288 | 4.060271 | 2.795456 |
| Psmc5        | ENSRNOG00000010038 | 84.63905 | 82.00775 | 66.18951 | 68.39428 | 73.78246 | 60.10956 |
| Wdr60        | ENSRNOG00000004520 | 3.179836 | 3.68732  | 3.839188 | 2.477817 | 3.379923 | 3.538614 |
| Pkia         | ENSRNOG00000012095 | 5.795178 | 2.932455 | 2.787846 | 4.397806 | 2.274677 | 2.229789 |
| Dus4l        | ENSRNOG00000008155 | 1.665798 | 1.467443 | 1.257769 | 1.191918 | 1.287003 | 0.638054 |
| AABR07045462 | ENSRNOG00000000320 | 0.174821 | 0.17625  | 0.109205 | 0.161052 | 0.159908 | 0.104501 |
| .1           |                    |          |          |          |          |          |          |
| Rcc1l        | ENSRNOG00000001483 | 8.305372 | 8.338264 | 8.204509 | 6.22959  | 6.724574 | 7.60242  |
| Ambra1       | ENSRNOG00000017422 | 7.371145 | 7.898433 | 8.154749 | 6.638145 | 6.477484 | 7.632944 |
| Nol11        | ENSRNOG00000052934 | 21.31291 | 19.78691 | 15.85805 | 18.24917 | 15.22041 | 14.46462 |
| AABR07018323 | ENSRNOG00000038483 | 4.094557 | 4.249421 | 5.303511 | 3.57236  | 2.555591 | 3.520181 |
| .1           |                    |          |          |          |          |          |          |
| Stmn3        | ENSRNOG00000013657 | 0.231962 | 0.272834 | 0.434696 | 0.142462 | 0.070725 | 0.138658 |
| Cks1b        | ENSRNOG00000042561 | 45.37234 | 28.45194 | 17.22009 | 28.25932 | 19.75324 | 10.87971 |
| Cdc37        | ENSRNOG00000033426 | 42.33111 | 47.87894 | 40.14344 | 36.49234 | 29.56141 | 28.79457 |
| Nmrall       | ENSRNOG00000003794 | 20.60521 | 14.5016  | 10.81596 | 15.50385 | 11.24926 | 9.221633 |
| Mcm2         | ENSRNOG00000016316 | 62.1494  | 30.75355 | 21.49027 | 53.81732 | 20.02126 | 18.39878 |
| RGD1565616   | ENSRNOG00000021237 | 12.61973 | 12.38294 | 11.28676 | 7.462312 | 7.375967 | 9.771269 |
| Tcp11        | ENSRNOG00000000499 | 0.091604 | 0.11544  | 0.021458 | 0.021097 | 0.041895 | 0        |
| Tepsin       | ENSRNOG00000028161 | 6.459512 | 5.50917  | 5.475399 | 4.393945 | 3.871565 | 4.885567 |
| Snrpd1       | ENSRNOG00000013714 | 59.96453 | 43.43174 | 27.99468 | 47.43988 | 33.48684 | 24.43086 |
| Dusp4        | ENSRNOG00000011921 | 0.990624 | 0.898846 | 0.701315 | 0.8112   | 0.59401  | 0.602027 |
| Hgfac        | ENSRNOG00000009572 | 0.128653 | 0.021617 | 0.040183 | 0.079013 | 0        | 0.019226 |
| Ss18         | ENSRNOG00000016800 | 36.96349 | 31.51509 | 30.23416 | 26.27269 | 26.37064 | 26.12921 |
| Ets1         | ENSRNOG00000008941 | 16.19714 | 15.95236 | 13.38349 | 11.84416 | 13.21611 | 12.02714 |
| Ccdc34       | ENSRNOG00000005902 | 6.175336 | 3.278566 | 1.977379 | 4.175082 | 1.835379 | 1.3959   |
| Aaed1        | ENSRNOG00000018886 | 8.389911 | 10.0587  | 10.62339 | 7.520201 | 7.881603 | 7.624411 |
| Shc4         | ENSRNOG00000037134 | 0.515141 | 0.448529 | 0.351044 | 0.301997 | 0.364106 | 0.251944 |
| Elavl1       | ENSRNOG0000001069  | 46.2577  | 41.57046 | 36.76948 | 43.83752 | 39.48863 | 36.08692 |
| Cstf2        | ENSRNOG00000048025 | 65.46521 | 42.52267 | 20.2668  | 56.15116 | 32.11154 | 17.31808 |
| Nfe2l2       | ENSRNOG00000001548 | 143.9058 | 192.5685 | 154.338  | 128.9888 | 184.9165 | 148.9329 |
| Sdccag8      | ENSRNOG00000004181 | 7.095511 | 7.601573 | 7.079796 | 5.103556 | 5.894915 | 6.518701 |
| Vegfb        | ENSRNOG00000021156 | 5.929893 | 10.62267 | 10.14825 | 5.372541 | 8.76362  | 8.217174 |
| Cbx5         | ENSRNOG00000036841 | 43.73384 | 34.823   | 26.31539 | 35.87659 | 28.70966 | 24.08837 |
| Csrnp1       | ENSRNOG00000033433 | 7.662312 | 7.724911 | 4.652903 | 5.117633 | 5.836059 | 3.92403  |
| Pdlim1       | ENSRNOG00000016166 | 309.5582 | 158.8781 | 136.6505 | 268.0467 | 144.5552 | 114.173  |
| Bms1         | ENSRNOG00000006576 | 15.338   | 12.59857 | 12.21443 | 13.45162 | 11.37352 | 11.64191 |
| Hsf1         | ENSRNOG00000021732 | 11.83338 | 15.52918 | 12.4632  | 10.36713 | 13.45944 | 11.86146 |
| Alpk2        | ENSRNOG00000017421 | 0.050056 | 0.100931 | 0.060303 | 0.019763 | 0.013082 | 0.012824 |
| Fchsd1       | ENSRNOG00000039415 | 3.333758 | 4.799112 | 4.340165 | 2.561778 | 4.420113 | 3.111344 |
| Mrpl2        | ENSRNOG00000018057 | 21.81969 | 27.80007 | 23.27699 | 20.67324 | 27.3054  | 22.79427 |
| Zfp689       | ENSRNOG00000018877 | 4.80954  | 4.729776 | 5.10504  | 4.628525 | 4.08011  | 4.548275 |
| Dbi          | ENSRNOG00000046889 | 51.37021 | 45.16967 | 29.46492 | 37.74283 | 35.72131 | 25.48974 |

|              |                     |          |          |          |          |          |          |
|--------------|---------------------|----------|----------|----------|----------|----------|----------|
| Cyp19a1      | ENSRNOG00000000196  | 0.764296 | 0.801362 | 0.315103 | 0.563278 | 0.517331 | 0.233002 |
| Atp1b4       | ENSRNOG00000007059  | 0.114589 | 0.259932 | 0.393689 | 0.061579 | 0.148487 | 0.351048 |
| Isg15        | ENSRNOG000000021802 | 278.2352 | 903.0393 | 827.7405 | 118.1885 | 808.1906 | 542.5256 |
| Tmem129      | ENSRNOG000000017329 | 25.862   | 22.98368 | 17.40404 | 22.87822 | 21.77563 | 16.06808 |
| Dusp8        | ENSRNOG000000029394 | 1.607642 | 1.058007 | 0.899628 | 1.41931  | 0.79652  | 0.380391 |
| Deaf1        | ENSRNOG000000017960 | 7.514126 | 6.326803 | 7.098732 | 7.321652 | 6.004537 | 6.99662  |
| AC119762.3   | ENSRNOG000000058654 | 2.481281 | 1.407123 | 2.615568 | 1.885824 | 0.964584 | 2.447305 |
| Tcp1         | ENSRNOG000000014160 | 102.4978 | 82.26401 | 55.69892 | 88.84662 | 68.50596 | 51.74628 |
| Shmt1        | ENSRNOG000000005275 | 15.72152 | 12.09773 | 11.96518 | 11.66542 | 10.97604 | 8.53467  |
| Map3k1       | ENSRNOG000000013177 | 2.345234 | 2.227823 | 2.332337 | 2.121517 | 1.85863  | 2.216709 |
| Serpinb6b    | ENSRNOG000000016420 | 8.048476 | 5.266448 | 6.634971 | 3.77857  | 4.034879 | 3.642999 |
| Lamtor5      | ENSRNOG000000018186 | 29.12594 | 42.11334 | 33.16892 | 26.28149 | 31.87847 | 25.08879 |
| LOC103690024 | ENSRNOG000000010407 | 0.490152 | 0.776532 | 0.734833 | 0.38704  | 0.691723 | 0.514833 |
| Zkscan3      | ENSRNOG000000055000 | 8.740765 | 10.69512 | 10.37408 | 8.052314 | 8.910796 | 9.538783 |
| LOC100911727 | ENSRNOG000000047206 | 32.08279 | 15.71341 | 10.81359 | 28.4104  | 12.09397 | 9.766894 |
| Prmt5        | ENSRNOG000000012046 | 24.12652 | 22.50972 | 17.8379  | 17.44318 | 19.99945 | 14.62677 |
| Dph2         | ENSRNOG000000019735 | 7.189007 | 7.923377 | 5.175737 | 5.799608 | 5.01539  | 4.078807 |
| Cxxc1        | ENSRNOG000000014614 | 13.42083 | 17.22825 | 17.10548 | 11.62655 | 14.19739 | 11.67492 |
| Tmem167b     | ENSRNOG000000042160 | 23.105   | 26.85634 | 26.04282 | 20.65914 | 25.36078 | 25.28684 |
| LOC103689949 | ENSRNOG000000021731 | 7.188875 | 6.006889 | 4.120317 | 6.830046 | 5.216562 | 3.808301 |
| Sod1         | ENSRNOG000000002115 | 478.3974 | 542.8378 | 438.7549 | 307.3529 | 474.993  | 361.5372 |
| Dpf1         | ENSRNOG000000020687 | 2.310211 | 1.59655  | 1.745692 | 1.887965 | 1.039525 | 0.601384 |
| Tnip1        | ENSRNOG000000010370 | 67.43321 | 68.67737 | 60.09198 | 56.23776 | 65.62221 | 50.33829 |
| Isy1         | ENSRNOG000000010021 | 34.62028 | 35.85774 | 30.77552 | 26.03271 | 32.37064 | 27.00922 |
| H2afx        | ENSRNOG000000010386 | 58.86696 | 22.82356 | 15.16925 | 57.74675 | 22.45306 | 13.80787 |
| Ero1b        | ENSRNOG000000002609 | 4.393935 | 4.743328 | 4.015754 | 3.00164  | 3.747039 | 3.624606 |
| Pkd1         | ENSRNOG000000010771 | 23.51822 | 20.21593 | 22.27693 | 20.95659 | 16.72733 | 21.30902 |
| Med11        | ENSRNOG000000019384 | 16.1336  | 13.68437 | 16.38441 | 13.03838 | 12.5923  | 12.38712 |
| Ankrd34a     | ENSRNOG000000033741 | 1.054728 | 0.5702   | 0.816402 | 0.661852 | 0.461403 | 0.438592 |
| Abcb9        | ENSRNOG000000001082 | 0.056376 | 0.097433 | 0.030185 | 0.022258 | 0.0442   | 0.014443 |
| Synpo        | ENSRNOG000000019181 | 23.64774 | 16.37447 | 16.51245 | 20.29905 | 11.62565 | 15.17672 |
| Relt         | ENSRNOG000000025075 | 3.823389 | 1.385754 | 1.199101 | 3.405809 | 1.271719 | 0.878303 |
| Daw1         | ENSRNOG000000016247 | 0.182893 | 0.237069 | 0.53859  | 0.048139 | 0.167291 | 0.491968 |
| Zfand3       | ENSRNOG000000059659 | 30.51623 | 29.24941 | 37.38064 | 27.73909 | 25.641   | 29.86202 |
| Stoml2       | ENSRNOG000000009535 | 60.40322 | 57.58932 | 50.89344 | 45.80019 | 53.27054 | 41.57531 |
| Rgs2         | ENSRNOG000000003687 | 213.1206 | 188.1248 | 102.7047 | 65.86288 | 86.28639 | 61.03043 |
| Mdc1         | ENSRNOG000000032813 | 7.671878 | 4.27459  | 2.767945 | 6.203174 | 2.73385  | 2.344914 |
| Casp7        | ENSRNOG000000056216 | 10.2073  | 10.63553 | 9.142498 | 6.384987 | 9.484748 | 6.779485 |
| Grip2        | ENSRNOG000000009726 | 0.033801 | 0.017038 | 0.055425 | 0        | 0.007729 | 0.02273  |
| Isynal       | ENSRNOG000000019741 | 4.470592 | 3.623368 | 3.141694 | 4.098285 | 2.926598 | 2.908145 |
| Mob1b        | ENSRNOG000000010996 | 8.270412 | 8.109542 | 6.960758 | 6.664768 | 6.750663 | 6.530376 |
| Hexim1       | ENSRNOG000000003203 | 26.86765 | 28.8428  | 33.04202 | 23.83475 | 24.27225 | 24.2208  |
| Ttc22        | ENSRNOG000000007189 | 1.1828   | 0.949554 | 0.841471 | 1.140085 | 0.791389 | 0.697213 |
| Eps8l3       | ENSRNOG000000048209 | 0.048322 | 0.081195 | 0.015092 | 0.014839 | 0.029467 | 0        |
| AABR07044408 | ENSRNOG000000051805 | 1.013046 | 1.021322 | 3.037503 | 0        | 0.555976 | 1.453345 |
| .1           |                     |          |          |          |          |          |          |
| Cdc7         | ENSRNOG000000002105 | 8.461661 | 3.94776  | 2.516327 | 7.574053 | 2.566217 | 2.112008 |
| Armc7        | ENSRNOG000000042691 | 4.524084 | 5.715269 | 4.463977 | 4.099708 | 4.763093 | 4.089601 |
| Snx8         | ENSRNOG000000001258 | 21.10418 | 26.80649 | 26.23024 | 19.59601 | 21.56769 | 20.67726 |
| Epha2        | ENSRNOG000000009222 | 30.59984 | 28.35794 | 18.53824 | 19.49376 | 19.0893  | 15.57378 |
| Fbxw17       | ENSRNOG000000030027 | 32.07753 | 58.28759 | 52.08908 | 25.49754 | 56.43183 | 45.32785 |
| Cgnl1        | ENSRNOG000000054080 | 0.137786 | 0.343973 | 0.319689 | 0.102756 | 0.23406  | 0.188259 |
| Gng12        | ENSRNOG000000050231 | 63.01462 | 88.86632 | 68.9625  | 58.33651 | 72.19033 | 51.95039 |
| Actr8        | ENSRNOG000000015280 | 14.93587 | 14.86457 | 15.79162 | 13.22951 | 14.12947 | 13.2202  |
| Cln6         | ENSRNOG000000008345 | 3.531712 | 3.801256 | 4.296559 | 3.238375 | 2.876515 | 3.771971 |
| Bcr          | ENSRNOG000000001304 | 10.16913 | 9.485585 | 7.986444 | 7.078413 | 6.810125 | 7.164205 |
| Atp5mc3      | ENSRNOG000000001596 | 105.551  | 101.9162 | 85.8534  | 92.23956 | 85.96027 | 81.61551 |

|                    |                    |          |          |          |          |          |          |
|--------------------|--------------------|----------|----------|----------|----------|----------|----------|
| Rab30              | ENSRNOG00000010224 | 22.83793 | 23.24484 | 19.83763 | 18.57283 | 19.99014 | 18.68936 |
| Elp5               | ENSRNOG00000027628 | 21.14732 | 23.05252 | 19.86689 | 17.84758 | 22.15734 | 16.70012 |
| Pomt2              | ENSRNOG00000012146 | 6.498071 | 5.616539 | 6.441037 | 5.535077 | 5.231771 | 6.022493 |
| Prr30              | ENSRNOG00000025726 | 0.110125 | 0.08882  | 0.185736 | 0.04058  | 0.020146 | 0.019749 |
| Cfdp1              | ENSRNOG00000019326 | 26.85441 | 30.92838 | 28.23314 | 24.50865 | 29.58033 | 24.0176  |
| Ube2j1             | ENSRNOG00000007434 | 37.15399 | 34.36131 | 35.34486 | 35.45772 | 32.70205 | 31.30843 |
| AABR07044362<br>.3 | ENSRNOG00000058490 | 1.23626  | 0.997088 | 1.15837  | 0.797222 | 0.565399 | 0.110848 |
| Tbx15              | ENSRNOG00000019565 | 0.655257 | 0.53357  | 0.436865 | 0.325041 | 0.437993 | 0.225974 |
| Plekhg4            | ENSRNOG00000016479 | 0.236134 | 0.102027 | 0.252865 | 0.082871 | 0.061712 | 0.120988 |
| Timm10             | ENSRNOG00000007883 | 10.85801 | 16.92146 | 13.51344 | 9.544657 | 14.17738 | 9.066888 |
| Gclc               | ENSRNOG00000006302 | 41.40654 | 25.21207 | 30.34062 | 40.60792 | 23.17679 | 29.44634 |
| LOC100912489       | ENSRNOG00000054017 | 137.4366 | 92.80416 | 56.79499 | 105.3645 | 75.48914 | 46.35564 |
| LOC361635          | ENSRNOG00000016063 | 20.58028 | 27.50053 | 27.84566 | 19.15914 | 22.08608 | 23.47368 |
| LOC108348098       | ENSRNOG00000047683 | 2.490611 | 2.869667 | 2.166999 | 2.185183 | 2.278144 | 1.967332 |
| Ankfy1             | ENSRNOG00000016212 | 18.85595 | 22.5736  | 21.55672 | 16.04581 | 19.11485 | 20.6502  |
| Ska2               | ENSRNOG00000025981 | 28.04698 | 19.25893 | 14.20908 | 22.88791 | 16.96825 | 12.21103 |
| Pacsin3            | ENSRNOG00000014204 | 21.44561 | 25.87169 | 25.27132 | 18.6403  | 24.40382 | 20.46753 |
| LOC367195          | ENSRNOG00000031912 | 0.72422  | 1.147358 | 0.58165  | 0.190622 | 0.189268 | 0.2783   |
| Star               | ENSRNOG00000015052 | 4.095726 | 3.288056 | 4.619427 | 1.676948 | 2.566931 | 3.162347 |
| Hist1h2ah          | ENSRNOG00000049649 | 68.37365 | 30.87356 | 15.12955 | 65.75817 | 20.88092 | 7.189063 |
| Cep164             | ENSRNOG00000029826 | 16.01132 | 12.63075 | 14.0566  | 13.52258 | 11.73666 | 10.69943 |
| Ift27              | ENSRNOG00000006440 | 11.87318 | 12.05661 | 11.04479 | 9.516462 | 11.09555 | 7.571342 |
| Irak2              | ENSRNOG00000021817 | 4.429874 | 5.350286 | 4.039343 | 3.519488 | 5.112559 | 3.225596 |
| Tead2              | ENSRNOG00000020695 | 5.625037 | 4.021981 | 5.476228 | 4.759347 | 3.667311 | 5.11519  |
| Scap               | ENSRNOG00000020853 | 24.09709 | 25.31523 | 28.54238 | 21.57699 | 23.47343 | 23.34968 |
| Runx1              | ENSRNOG00000001704 | 9.482755 | 11.60467 | 12.10645 | 7.614968 | 9.398098 | 11.53312 |
| Zbtb48             | ENSRNOG00000009595 | 6.277321 | 4.915615 | 5.308438 | 6.001122 | 3.863993 | 4.336434 |
| Sart1              | ENSRNOG00000020475 | 20.98254 | 21.48067 | 19.17473 | 16.22517 | 18.94063 | 17.62254 |
| Sytl2              | ENSRNOG00000049878 | 1.4317   | 2.028558 | 1.559037 | 0.784232 | 1.415747 | 1.387809 |
| Hoxc9              | ENSRNOG00000016199 | 0.095658 | 0.192879 | 0.179263 | 0.044062 | 0.131247 | 0.042886 |
| Pusl1              | ENSRNOG00000022354 | 10.4199  | 10.93823 | 9.64262  | 9.262731 | 10.43498 | 9.188819 |
| Rcan3              | ENSRNOG00000018576 | 7.401195 | 5.555694 | 7.990198 | 5.336025 | 4.635856 | 4.760772 |
| Gmeb1              | ENSRNOG00000010910 | 3.113839 | 3.320025 | 2.493268 | 2.851198 | 2.753266 | 2.284364 |
| Mtdh               | ENSRNOG00000006870 | 45.31326 | 46.13832 | 40.62031 | 44.38263 | 42.64989 | 37.16484 |
| Fpgt               | ENSRNOG00000009548 | 6.758014 | 8.379168 | 8.000398 | 6.342882 | 7.627183 | 6.662218 |
| Eif4enif1          | ENSRNOG00000018475 | 8.088719 | 6.901153 | 7.375477 | 6.906656 | 6.559439 | 6.051125 |
| Sh3pxd2b           | ENSRNOG00000004063 | 5.357185 | 7.548511 | 11.57352 | 4.642344 | 5.728993 | 10.79001 |
| Pcca               | ENSRNOG00000057042 | 4.506504 | 5.777067 | 5.769639 | 3.221036 | 3.820019 | 5.225074 |
| Pole3              | ENSRNOG00000055277 | 19.69024 | 14.02155 | 9.856675 | 15.46817 | 9.868782 | 8.736863 |
| Pum1               | ENSRNOG00000011709 | 20.06239 | 23.84548 | 22.17734 | 18.04628 | 20.10468 | 20.98083 |
| Lysmd4             | ENSRNOG00000050624 | 7.504227 | 9.406705 | 9.333755 | 7.127295 | 8.321918 | 7.889742 |
| Ccdc71             | ENSRNOG00000048718 | 7.770106 | 10.52554 | 8.58155  | 6.813732 | 6.789755 | 5.458688 |
| Casp8ap2           | ENSRNOG00000006487 | 9.297759 | 7.619888 | 6.264156 | 9.238202 | 7.478178 | 6.207325 |
| Ppp2r2b            | ENSRNOG00000018851 | 0.379776 | 0.2027   | 0.230255 | 0.308703 | 0.183906 | 0.160246 |
| LOC100911166       | ENSRNOG00000046797 | 0.62655  | 0.478537 | 0.320223 | 0.349819 | 0.347334 | 0.221312 |
| Rpp25l             | ENSRNOG00000059653 | 19.52086 | 23.80219 | 19.53195 | 17.24066 | 21.96396 | 18.94894 |
| Cracr2b            | ENSRNOG00000019199 | 9.178466 | 8.16645  | 7.797154 | 8.761163 | 7.409262 | 7.560513 |
| Wipf2              | ENSRNOG00000027849 | 1.850131 | 1.404691 | 2.033193 | 0.883767 | 0.689456 | 1.781788 |
| Ddx55              | ENSRNOG00000001043 | 4.482826 | 5.178536 | 3.727845 | 4.319024 | 4.630046 | 3.081612 |
| Polr2g             | ENSRNOG00000019439 | 72.25526 | 66.92747 | 54.5111  | 62.03573 | 59.32509 | 51.86396 |
| Rhbd11             | ENSRNOG00000019921 | 2.08398  | 1.459032 | 2.41373  | 1.066578 | 1.191376 | 1.686918 |
| Dis3l2             | ENSRNOG00000018931 | 4.997027 | 5.444364 | 5.869608 | 4.192187 | 5.189838 | 4.867915 |
| Napepld            | ENSRNOG00000011363 | 2.358012 | 2.348976 | 2.814416 | 2.068846 | 1.694674 | 2.567358 |
| Majin              | ENSRNOG00000054336 | 0.168754 | 0.510399 | 0.606134 | 0.051821 | 0.077179 | 0.151312 |
| Pttg1ip            | ENSRNOG00000001223 | 45.04024 | 60.90466 | 72.50666 | 38.45056 | 48.67155 | 50.82466 |
| Rps19bp1           | ENSRNOG00000017847 | 27.05477 | 27.30105 | 22.51004 | 20.42371 | 23.83026 | 20.37261 |

|              |                    |          |          |          |          |          |          |
|--------------|--------------------|----------|----------|----------|----------|----------|----------|
| Smarca1      | ENSRNOG00000028302 | 0.777915 | 0.78427  | 0.86143  | 0.564628 | 0.646866 | 0.443871 |
| Chordc1      | ENSRNOG00000026643 | 27.0541  | 30.60036 | 27.75045 | 22.16096 | 29.20924 | 24.74669 |
| Tom5         | ENSRNOG00000062108 | 3.493324 | 3.060667 | 2.62378  | 3.026621 | 2.510608 | 2.485924 |
| Ctu2         | ENSRNOG00000051531 | 12.47477 | 11.29848 | 8.676449 | 9.969658 | 8.759852 | 8.018583 |
| Cntrob       | ENSRNOG00000008270 | 9.385508 | 5.45483  | 3.400583 | 7.250135 | 4.158671 | 2.789256 |
| LOC100909715 | ENSRNOG00000061540 | 13.10536 | 12.85372 | 9.390331 | 11.52684 | 11.33648 | 8.985923 |
| Mrpl35       | ENSRNOG00000008546 | 22.80751 | 23.72424 | 19.91232 | 16.24036 | 22.06449 | 14.77225 |
| Mycbpap      | ENSRNOG00000042912 | 0.77604  | 0.884988 | 1.478134 | 0.562558 | 0.605108 | 0.878344 |
| Psm4         | ENSRNOG00000020979 | 369.0955 | 383.2596 | 321.4033 | 321.5239 | 368.1924 | 296.1029 |
| Srgap2       | ENSRNOG00000006733 | 10.15218 | 12.78371 | 11.52118 | 6.427559 | 9.554354 | 10.5898  |
| Plin1        | ENSRNOG00000015086 | 0.204708 | 0.368536 | 0.438423 | 0.175114 | 0.294242 | 0.327767 |
| Ift122       | ENSRNOG00000010952 | 8.509587 | 13.04949 | 10.30759 | 7.077441 | 11.41117 | 9.899421 |
| Sp100        | ENSRNOG00000022769 | 36.31905 | 100.9103 | 108.8663 | 27.86882 | 90.56991 | 85.85022 |
| Zfp524       | ENSRNOG00000016565 | 6.716814 | 6.93993  | 6.371808 | 6.264643 | 5.266133 | 5.274435 |
| Paf1         | ENSRNOG00000019746 | 17.9938  | 20.07504 | 17.05078 | 16.29536 | 13.37444 | 12.0158  |
| Mphosph6     | ENSRNOG00000050087 | 16.89555 | 17.28285 | 15.13603 | 15.83054 | 13.4565  | 12.74756 |
| Pnp          | ENSRNOG00000046493 | 7.322396 | 8.824226 | 7.941219 | 3.795663 | 7.576456 | 6.29759  |
| Nudt9        | ENSRNOG00000002186 | 16.99648 | 23.81844 | 20.40012 | 15.19471 | 19.88581 | 18.98634 |
| Ppm1f        | ENSRNOG00000037909 | 15.37614 | 14.37094 | 15.25693 | 10.5829  | 12.58533 | 13.14994 |
| Ebi3         | ENSRNOG00000050509 | 0.617924 | 2.272018 | 1.05581  | 0.401827 | 1.396404 | 0.325916 |
| Dhx37        | ENSRNOG00000022171 | 6.430653 | 6.389381 | 5.889872 | 4.171671 | 4.142038 | 5.311763 |
| Cot11        | ENSRNOG00000016257 | 2.099562 | 1.42947  | 1.737338 | 1.783477 | 1.247048 | 1.149093 |
| MGC105567    | ENSRNOG00000038955 | 13.27544 | 33.18956 | 21.36268 | 10.19785 | 32.43148 | 18.61281 |
| Tnf          | ENSRNOG00000000837 | 1.660267 | 1.909213 | 1.507048 | 1.147124 | 1.708463 | 0.744333 |
| AABR07048271 | ENSRNOG00000033271 | 0.090049 | 0.363137 | 0.3375   | 0        | 0        | 0        |
| .1           |                    |          |          |          |          |          |          |
| AABR07026557 | ENSRNOG00000053136 | 0.986222 | 0.434997 | 0.462043 | 0.454272 | 0        | 0.331608 |
| .1           |                    |          |          |          |          |          |          |
| Ppm1g        | ENSRNOG00000026905 | 43.41915 | 28.90342 | 25.07839 | 33.78384 | 24.62972 | 21.54583 |
| Sart3        | ENSRNOG00000000702 | 10.48382 | 10.05616 | 8.684834 | 8.741311 | 5.715582 | 6.930863 |
| Ugdh         | ENSRNOG00000002643 | 154.069  | 154.0149 | 152.7613 | 89.03039 | 132.4848 | 120.5806 |
| Cry1         | ENSRNOG00000006622 | 3.474727 | 2.597137 | 2.11908  | 2.455975 | 1.959044 | 1.839809 |
| RGD1560795   | ENSRNOG00000028235 | 5.221792 | 5.932955 | 3.805509 | 4.581435 | 3.487484 | 2.155244 |
| AABR07066522 | ENSRNOG00000049511 | 6.075199 | 7.167356 | 6.747872 | 4.763146 | 4.526627 | 5.877767 |
| .1           |                    |          |          |          |          |          |          |
| Cnih1        | ENSRNOG00000009811 | 61.89465 | 77.25025 | 72.50801 | 57.29942 | 66.19853 | 55.38846 |
| Map3k5       | ENSRNOG00000031700 | 5.998055 | 5.460483 | 5.56068  | 5.779009 | 5.041276 | 4.818485 |
| Mtif3        | ENSRNOG00000047329 | 6.063461 | 7.669548 | 6.60204  | 5.353138 | 7.266555 | 6.393225 |
| Exosc2       | ENSRNOG00000009245 | 15.86872 | 10.40623 | 6.086166 | 11.92318 | 5.500115 | 4.887018 |
| Scrn2        | ENSRNOG00000010214 | 10.96288 | 15.54435 | 13.2934  | 9.316301 | 14.85382 | 10.72341 |
| Itpa         | ENSRNOG00000021233 | 68.29326 | 55.05872 | 51.4474  | 59.28916 | 50.18918 | 48.70414 |
| AABR07029596 | ENSRNOG00000046195 | 0.386068 | 0.500429 | 0.69765  | 0.127022 | 0.403582 | 0.321439 |
| .1           |                    |          |          |          |          |          |          |
| Nfkbie       | ENSRNOG00000019907 | 22.61938 | 24.97994 | 22.98605 | 18.5225  | 23.23853 | 16.53384 |
| Gmn          | ENSRNOG00000018782 | 25.11391 | 16.96678 | 6.579109 | 21.3904  | 12.64113 | 5.529618 |
| Dhx34        | ENSRNOG00000047575 | 1.977507 | 2.53739  | 1.93714  | 1.324911 | 1.3155   | 1.561553 |
| Klrk1        | ENSRNOG00000061739 | 10.16445 | 55.31746 | 41.71178 | 3.439196 | 50.50411 | 27.56667 |
| Ndufb8       | ENSRNOG00000014078 | 94.41762 | 89.181   | 85.26983 | 89.15408 | 84.94361 | 83.99095 |
| AABR07035832 | ENSRNOG00000055795 | 21.35133 | 21.79316 | 12.17763 | 16.12665 | 11.76647 | 9.037161 |
| .1           |                    |          |          |          |          |          |          |
| Tprn         | ENSRNOG00000010896 | 2.403712 | 2.859553 | 2.702722 | 2.007712 | 2.330578 | 2.571957 |
| Psmc3        | ENSRNOG00000011414 | 99.31589 | 114.0203 | 77.90188 | 92.48526 | 91.36054 | 65.56944 |
| Pak1ip1      | ENSRNOG00000023799 | 33.65777 | 28.9099  | 20.23791 | 25.34784 | 24.31333 | 17.76728 |
| LOC100365112 | ENSRNOG00000036571 | 0.927283 | 0.723989 | 1.659328 | 0.597331 | 0.644106 | 1.362814 |
| Serpinb9     | ENSRNOG00000033772 | 386.1133 | 426.677  | 301.5155 | 219.3288 | 376.2351 | 211.3446 |
| Tsen54       | ENSRNOG00000004598 | 6.191918 | 6.666103 | 7.894593 | 5.194917 | 5.724386 | 5.472624 |
| Lif          | ENSRNOG00000007002 | 10.4199  | 12.68532 | 8.215997 | 8.711725 | 7.804639 | 5.975949 |



|              |                    |          |          |          |          |          |          |
|--------------|--------------------|----------|----------|----------|----------|----------|----------|
| Slfn2        | ENSRNOG00000037113 | 146.4055 | 367.1615 | 332.9563 | 114.7158 | 349.9258 | 275.1693 |
| Ranbp1       | ENSRNOG00000001884 | 106.6217 | 68.23676 | 50.28339 | 98.07059 | 59.7029  | 48.15516 |
| Ftsj1        | ENSRNOG00000004776 | 14.03188 | 18.76416 | 15.82699 | 12.58523 | 17.94459 | 13.12758 |
| Bbs9         | ENSRNOG00000015189 | 2.845151 | 2.907509 | 3.671663 | 2.239813 | 2.75622  | 3.0613   |
| Susd6        | ENSRNOG00000045941 | 21.45138 | 25.50403 | 25.79806 | 17.70248 | 16.57344 | 22.4088  |
| Spry2        | ENSRNOG00000010058 | 9.671511 | 9.18987  | 5.663853 | 7.150076 | 7.276216 | 5.051376 |
| AABR07003173 | ENSRNOG00000037360 | 0.218599 | 0.308539 | 0.450619 | 0.120829 | 0.119971 | 0.392011 |
| .1           |                    |          |          |          |          |          |          |
| Rangap1      | ENSRNOG00000031789 | 92.64765 | 51.3061  | 34.69332 | 84.97802 | 40.92042 | 32.15208 |
| Arhgef39     | ENSRNOG00000021433 | 6.038653 | 3.144661 | 1.844481 | 5.30897  | 2.531248 | 1.671252 |
| Kbtbd2       | ENSRNOG00000013809 | 15.44597 | 15.10962 | 12.80103 | 11.37648 | 12.99759 | 11.54127 |
| AABR07018078 | ENSRNOG00000053891 | 34.08411 | 112.1542 | 80.50099 | 19.73143 | 105.2403 | 55.8905  |
| .1           |                    |          |          |          |          |          |          |
| Ano3         | ENSRNOG00000004731 | 0.190563 | 0.162563 | 0.2541   | 0.094529 | 0.120674 | 0.098577 |
| B4galt5      | ENSRNOG00000008283 | 32.03581 | 47.88845 | 57.40882 | 29.57877 | 43.54029 | 49.26623 |
| Nemp1        | ENSRNOG00000046492 | 6.871361 | 5.927272 | 3.339724 | 4.569895 | 4.302159 | 2.767578 |
| Tigd2        | ENSRNOG00000038449 | 6.36662  | 8.902366 | 7.910766 | 4.615629 | 7.798429 | 7.445978 |
| Mcam         | ENSRNOG00000007726 | 1.778885 | 1.200678 | 0.988784 | 0.694396 | 0.785988 | 0.540686 |
| Cfap70       | ENSRNOG00000007046 | 0.436545 | 0.539136 | 0.971471 | 0.341837 | 0.479165 | 0.782849 |
| Arhgap26     | ENSRNOG00000013920 | 0.33352  | 0.467818 | 0.285332 | 0.160305 | 0.252013 | 0.234038 |
| RGD1560925   | ENSRNOG00000011042 | 0.05868  | 0.035496 | 0.054983 | 0.043247 | 0        | 0.042092 |
| Trove2       | ENSRNOG00000003434 | 14.2111  | 16.90301 | 13.42606 | 12.61454 | 15.59424 | 13.04843 |
| AABR07008298 | ENSRNOG00000054825 | 1.167029 | 3.039456 | 2.004752 | 0.895925 | 2.757639 | 1.30801  |
| .1           |                    |          |          |          |          |          |          |
| Ppif         | ENSRNOG00000010558 | 2.925453 | 4.081428 | 3.128772 | 2.341141 | 3.162416 | 2.888044 |
| Dhrs9        | ENSRNOG00000058568 | 1.74586  | 1.019583 | 0.628411 | 1.60835  | 0.62319  | 0.448624 |
| Cd3g         | ENSRNOG00000015945 | 0.567437 | 0.214527 | 0.066461 | 0.457401 | 0        | 0        |
| Tubg1        | ENSRNOG00000020213 | 39.01242 | 23.47095 | 21.17092 | 31.46545 | 21.2706  | 17.01675 |
| Acad9        | ENSRNOG00000014178 | 22.01411 | 20.20968 | 20.65812 | 19.74692 | 19.31921 | 19.75362 |
| Fam156b      | ENSRNOG00000048516 | 0.569282 | 0.43045  | 0.466738 | 0        | 0.06509  | 0.319027 |
| Pdc13        | ENSRNOG00000013286 | 25.77417 | 23.36095 | 19.25178 | 21.80926 | 19.77498 | 18.32033 |
| Lcmt2        | ENSRNOG00000043002 | 5.418938 | 5.089302 | 5.038909 | 5.143977 | 4.202799 | 3.879691 |
| Aasdhppt     | ENSRNOG00000005795 | 39.80733 | 43.09314 | 37.22286 | 38.25007 | 40.44062 | 32.10903 |
| Pold3        | ENSRNOG00000018411 | 13.65196 | 7.948367 | 5.719149 | 9.680865 | 5.78773  | 4.560705 |
| Synj2bp      | ENSRNOG00000006399 | 8.269217 | 9.232712 | 8.834948 | 7.187752 | 6.909368 | 8.056046 |
| Selenoh      | ENSRNOG00000054563 | 71.26639 | 58.28846 | 36.30374 | 58.25568 | 45.90625 | 33.24026 |
| Brsk1        | ENSRNOG00000017673 | 1.263561 | 1.411601 | 1.279947 | 1.006736 | 1.015203 | 1.178893 |
| Tmprss5      | ENSRNOG00000008058 | 0.277453 | 0.111888 | 0.138652 | 0.2556   | 0.050757 | 0.049755 |
| Snrnp70      | ENSRNOG00000020763 | 33.64765 | 31.6865  | 40.567   | 31.99416 | 25.77968 | 33.40357 |
| Dusp18       | ENSRNOG00000024945 | 4.01973  | 4.991581 | 5.121481 | 3.736994 | 3.990694 | 4.560271 |
| Mtfr1        | ENSRNOG00000021359 | 17.11953 | 16.47299 | 11.07862 | 14.97691 | 10.89003 | 8.83459  |
| Tbxas1       | ENSRNOG00000007918 | 0.312438 | 0.697478 | 0.815526 | 0.226151 | 0.38785  | 0.440228 |
| Nup107       | ENSRNOG00000006541 | 28.21451 | 13.05393 | 10.64892 | 25.06767 | 10.99022 | 9.860774 |
| Pes1         | ENSRNOG00000004515 | 37.66487 | 51.37217 | 41.36099 | 32.64465 | 39.08768 | 36.75125 |
| LOC102554838 | ENSRNOG00000031595 | 0.524743 | 0.793545 | 0.147505 | 0.193365 | 0.623973 | 0.047051 |
| Naxd         | ENSRNOG00000015021 | 36.55273 | 35.1428  | 32.9109  | 27.94919 | 31.7628  | 29.55686 |
| Hivep3       | ENSRNOG00000009341 | 0.479347 | 0.366345 | 0.340482 | 0.238602 | 0.187404 | 0.284224 |
| Cox16        | ENSRNOG00000047115 | 30.91869 | 32.7757  | 27.42629 | 30.47309 | 30.82849 | 25.6336  |
| LOC100911548 | ENSRNOG00000015125 | 14.68407 | 22.1515  | 18.18746 | 13.62722 | 17.49054 | 14.13686 |
| Egln2        | ENSRNOG00000020947 | 44.09396 | 48.5177  | 50.04543 | 36.25859 | 46.67845 | 42.18283 |
| Frem3        | ENSRNOG00000039152 | 0.013272 | 0.01338  | 0.024871 | 0.006113 | 0        | 0        |
| Pelp1        | ENSRNOG00000019268 | 13.37857 | 11.8353  | 10.01724 | 9.937589 | 7.805402 | 9.110321 |
| AABR07000747 | ENSRNOG00000054246 | 0.69466  | 1.120537 | 1.171608 | 0.511957 | 0.508321 | 0.373717 |
| .1           |                    |          |          |          |          |          |          |
| LOC108348151 | ENSRNOG00000046980 | 1.347792 | 0.959155 | 1.708596 | 0.730374 | 0.50763  | 0.355438 |
| Tbpl1        | ENSRNOG00000011114 | 32.76157 | 35.03633 | 30.79563 | 23.8103  | 30.2543  | 28.21669 |
| Supt16h      | ENSRNOG00000011953 | 46.05361 | 34.66577 | 30.16977 | 41.716   | 29.11482 | 28.91174 |

|              |                    |          |          |          |          |          |          |
|--------------|--------------------|----------|----------|----------|----------|----------|----------|
| Mrps6        | ENSRNOG00000059381 | 35.31139 | 30.55025 | 19.1832  | 29.70396 | 28.86301 | 16.33609 |
| C1rl         | ENSRNOG00000011718 | 8.030534 | 9.366497 | 10.62604 | 6.54907  | 8.360421 | 10.26959 |
| Ola1         | ENSRNOG00000019047 | 42.93198 | 45.11674 | 37.25631 | 41.84885 | 44.66558 | 36.86352 |
| Btf3         | ENSRNOG00000016912 | 162.5249 | 185.417  | 134.8428 | 135.9553 | 146.0408 | 125.3443 |
| Plin4        | ENSRNOG00000047046 | 4.318844 | 6.652433 | 11.6111  | 2.100126 | 4.610413 | 6.132177 |
| Xpr1         | ENSRNOG00000000042 | 4.598927 | 5.491897 | 5.173315 | 3.670297 | 3.509254 | 4.531544 |
| RT1-CE4      | ENSRNOG00000039744 | 50.5927  | 81.20329 | 78.59391 | 48.13007 | 75.8408  | 69.37706 |
| Fam53a       | ENSRNOG00000017548 | 10.34224 | 10.38511 | 9.92275  | 9.470605 | 10.02644 | 8.514406 |
| Zfp830       | ENSRNOG00000007578 | 7.78616  | 8.601665 | 6.820407 | 7.255345 | 6.521628 | 5.536975 |
| Arf2         | ENSRNOG00000004807 | 20.76609 | 15.97035 | 12.5072  | 13.25986 | 13.36793 | 9.246796 |
| Engase       | ENSRNOG00000027498 | 3.006492 | 3.284561 | 3.861947 | 2.769691 | 2.710017 | 2.931014 |
| Nfu1         | ENSRNOG00000018410 | 28.01817 | 36.56205 | 31.76232 | 23.37565 | 34.72416 | 24.41462 |
| Spa17        | ENSRNOG00000010934 | 1.422155 | 2.54169  | 1.877689 | 1.191038 | 2.306026 | 1.275165 |
| AABR07049128 | ENSRNOG00000061730 | 0.537448 | 0.309622 | 0.143882 | 0        | 0        | 0        |
| .1           |                    |          |          |          |          |          |          |
| Spata9       | ENSRNOG00000012770 | 0.633643 | 0.936935 | 0.989534 | 0.505904 | 0.463671 | 0.719658 |
| Neil1        | ENSRNOG00000018577 | 7.015344 | 8.604641 | 9.373546 | 5.926171 | 8.3628   | 8.37944  |
| S1pr3        | ENSRNOG00000014524 | 9.001442 | 3.73746  | 4.94961  | 4.953654 | 1.755047 | 3.706324 |
| Abhd17c      | ENSRNOG00000012683 | 10.07146 | 7.032628 | 8.984843 | 7.500338 | 6.417343 | 7.264053 |
| Lpcat4       | ENSRNOG00000005058 | 6.287872 | 4.451557 | 4.242031 | 4.91729  | 3.706504 | 3.85888  |
| Slc39a11     | ENSRNOG00000031213 | 10.23063 | 10.67225 | 11.44183 | 8.304924 | 9.882623 | 8.315907 |
| Acvr1b       | ENSRNOG00000006934 | 8.023971 | 10.09237 | 13.42057 | 6.204619 | 9.050239 | 9.8709   |
| RGD1559896   | ENSRNOG00000018836 | 32.40934 | 16.31493 | 19.13901 | 18.15664 | 12.27273 | 11.54512 |
| Mapk14       | ENSRNOG00000000513 | 34.12711 | 30.01395 | 34.23429 | 31.61164 | 29.37759 | 32.69279 |
| Lrrc47       | ENSRNOG00000024796 | 24.58204 | 22.08344 | 25.3862  | 20.15135 | 21.08749 | 21.06471 |
| Kcnk5        | ENSRNOG00000047005 | 0.189507 | 0.420323 | 0.355135 | 0.128026 | 0.150229 | 0.158592 |
| Zfp41        | ENSRNOG00000007489 | 5.410264 | 3.25735  | 3.098623 | 4.844065 | 2.654003 | 2.965176 |
| LOC688981    | ENSRNOG00000032000 | 0.999169 | 1.208798 | 1.497947 | 0.736377 | 0.913933 | 1.433436 |
| Ppa1         | ENSRNOG00000000557 | 127.9024 | 100.7039 | 103.0993 | 119.6371 | 96.93769 | 100.4007 |
| Lyar         | ENSRNOG00000005374 | 17.27445 | 11.5691  | 8.472946 | 11.81655 | 9.17032  | 6.631854 |
| Slpi         | ENSRNOG00000046699 | 6.339585 | 7.576876 | 14.03603 | 4.804085 | 6.827589 | 11.277   |
| Gcgr         | ENSRNOG00000036692 | 0.453979 | 0.320382 | 0.255226 | 0.146378 | 0.228388 | 0.101764 |
| Rbmx2        | ENSRNOG00000007371 | 6.491421 | 4.962279 | 3.475676 | 4.797252 | 3.360322 | 3.102127 |
| Dlx1         | ENSRNOG00000001520 | 0.111115 | 0.032007 | 0.104115 | 0.058493 | 0.014519 | 0.028466 |
| Irx3         | ENSRNOG00000011533 | 0.893704 | 1.773855 | 0.968241 | 0.617485 | 0.945194 | 0.601    |
| RGD1561149   | ENSRNOG00000008113 | 0.778772 | 1.083827 | 1.284917 | 0.709635 | 0.774279 | 1.05501  |
| Hif1an       | ENSRNOG00000014234 | 4.284776 | 6.06748  | 6.589203 | 3.856897 | 4.12868  | 4.721741 |
| Eif4a3       | ENSRNOG00000045791 | 113.4936 | 81.41819 | 81.02844 | 78.24114 | 69.17226 | 66.08067 |
| Hsp90aa1     | ENSRNOG00000007219 | 8.30753  | 7.073006 | 5.065265 | 7.213784 | 5.126489 | 4.544177 |
| Cdc45        | ENSRNOG00000050071 | 4.573542 | 1.663516 | 0.705678 | 4.087168 | 1.095947 | 0.583202 |
| Helq         | ENSRNOG00000002181 | 4.360503 | 4.407545 | 4.223733 | 3.568397 | 3.470531 | 4.021522 |
| Ifit1bl      | ENSRNOG00000036603 | 2.163812 | 12.53865 | 8.676165 | 1.454631 | 9.860457 | 5.401004 |
| LOC100911224 | ENSRNOG00000055843 | 11.58448 | 5.733387 | 4.802342 | 10.24086 | 4.302716 | 4.490602 |
| Masp1        | ENSRNOG00000001827 | 0.045714 | 0.107538 | 0.114224 | 0.028076 | 0.027876 | 0.054652 |
| Rpl36al      | ENSRNOG00000011494 | 144.8974 | 124.9109 | 145.3915 | 133.2438 | 120.9883 | 128.3962 |
| Grm1         | ENSRNOG00000014290 | 0.444043 | 1.541266 | 0.285303 | 0.134408 | 0.986395 | 0.136508 |
| Pop1         | ENSRNOG00000005243 | 6.307142 | 6.044507 | 4.50824  | 4.926185 | 5.187628 | 4.168793 |
| Prnd         | ENSRNOG00000021260 | 2.363397 | 1.725407 | 0.458171 | 0.90093  | 0.447265 | 0.146146 |
| Brd9         | ENSRNOG00000015676 | 12.77472 | 11.41433 | 10.87414 | 12.3235  | 10.43704 | 10.5647  |
| Bin1         | ENSRNOG00000012852 | 15.07836 | 23.73605 | 18.99461 | 14.03427 | 20.39516 | 17.43151 |
| Ifit2        | ENSRNOG00000036604 | 57.17895 | 238.1687 | 154.0653 | 29.83833 | 134.6749 | 95.79284 |
| Ccdc73       | ENSRNOG00000022660 | 0.174755 | 0.276858 | 0.280705 | 0.045997 | 0.228353 | 0.078346 |
| Nans         | ENSRNOG00000008945 | 102.4    | 79.75411 | 60.70854 | 80.06237 | 70.95205 | 52.48007 |
| Tor1b        | ENSRNOG00000006435 | 49.60473 | 62.72388 | 62.94088 | 44.26275 | 60.29196 | 53.58276 |
| Rfc4         | ENSRNOG00000001816 | 33.22037 | 20.47549 | 11.05749 | 25.18511 | 13.26446 | 9.353986 |
| RGD1304567   | ENSRNOG00000025034 | 30.49949 | 24.66299 | 24.70797 | 28.75578 | 23.90191 | 21.72104 |

|              |                    |          |          |          |          |          |          |
|--------------|--------------------|----------|----------|----------|----------|----------|----------|
| AABR07051376 | ENSRNOG00000027193 | 5.852186 | 5.777928 | 6.668408 | 5.230132 | 4.725366 | 4.547677 |
| .1           |                    |          |          |          |          |          |          |
| Anapc15      | ENSRNOG00000019936 | 123.3936 | 95.87223 | 55.60002 | 113.1695 | 74.94384 | 49.37001 |
| Mt-cyb       | ENSRNOG00000031766 | 34.11492 | 30.76513 | 27.76804 | 27.08939 | 26.02141 | 26.1602  |
| Zscan22      | ENSRNOG00000031113 | 3.970487 | 3.587807 | 3.086495 | 3.30553  | 2.152164 | 2.637117 |

---

**Supplementary Table 6. The significantly enriched metacore pathways for the 1848 genes up-regulated under AngII.**

| Maps                                                                                                          | Total | p-value  | FDR      | In_Data | Network Objects from Active Data                                                                                                                                                                                                         |
|---------------------------------------------------------------------------------------------------------------|-------|----------|----------|---------|------------------------------------------------------------------------------------------------------------------------------------------------------------------------------------------------------------------------------------------|
| Transcription_Negative regulation of HIF1A function                                                           | 69    | 6.67E-12 | 9.37E-09 | 23      | Ubiquitin, RACK1, MCM3, ING4, HIF-prolyl hydroxylase, EGLN2, MCM7, ARD1, Sirtuin3, VCP, MCM2, PSMA7, Sirtuin6, Elongin B, HSP90, FHL2, CHIP, PRDX2, VHL, HIF1A, COMMD1 (MURR1), LAMP2, EGLN1                                             |
| Regulation of degradation of deltaF508-CFTR in CF                                                             | 39    | 3.09E-10 | 2.17E-07 | 16      | Ubiquitin, RNF4, BAG-2, UFD1, USP19, VCP, Hdj-2, HSP90, Csp, CHIP, Sti1, Aha1, Dynein 1, cytoplasmic, intermediate chains, E2I, SUMO-2, HSPBP1                                                                                           |
| Beta-catenin-dependent transcription regulation in colorectal cancer                                          | 36    | 8.95E-08 | 4.19E-05 | 13      | COX-2 (PTGS2), Beta-catenin, PLAUR (uPAR), AKT1, MTS1 (S100A4), LAMC2, LAMC2 (80kDa), LAMC2 (100kDa), CD44, CD44 soluble, PLAU (UPA), Fascin, CD44 (EXT)                                                                                 |
| LRRK2 in neurons in Parkinson's disease                                                                       | 33    | 2.24E-06 | 7.85E-04 | 11      | Ubiquitin, MEK1/2, PAK1, AP2A2, HSP90, AP-2 alpha subunits, CHIP, MSN (moesin), eEF1A, Tubulin (in microtubules), VIL2 (ezrin)                                                                                                           |
| dATP/dITP metabolism                                                                                          | 94    | 3.06E-06 | 8.58E-04 | 19      | POLE1, POLA2, AK2, ADSSL1, POLE4, NDPK 7, DNA polymerase beta, POLD reg (p50), POLD cat (p125), Adenosine kinase, POLG cat, DGUOK, ADSS, DNA polymerase lambda, NDPK 6, POLG reg, ADSL, PNPB, PKM2                                       |
| Regulation of degradation of wtCFTR                                                                           | 20    | 1.19E-05 | 1.91E-03 | 8       | Ubiquitin, BAG-2, UFD1, VCP, HSP90, Csp, CHIP, HSPBP1                                                                                                                                                                                    |
| Immune response_BAFF-induced non-canonical NF-kB signaling                                                    | 32    | 1.25E-05 | 1.91E-03 | 10      | Cullin 1, Ubiquitin, UBE1C, c-IAP2, E2N(UBC13), SUMO-1, c-IAP1, E2I, UBC12, NEDD8                                                                                                                                                        |
| Cell cycle_Start of DNA replication in early S phase                                                          | 32    | 1.25E-05 | 1.91E-03 | 10      | CDC18L (CDC6), MCM3, ASK (Dbf4), PP2A catalytic, CDC7, MCM2, ORC1L, MCM4, MCM10, RPA2                                                                                                                                                    |
| Apoptosis and survival_IL-17-induced CIKS-dependent MAPK signaling pathways                                   | 32    | 1.25E-05 | 1.91E-03 | 10      | IKK-epsilon, Ubiquitin, MEK1/2, TPL2(MAP3K8), IL-17RC, E2N(UBC13), ABIN-2, TAB2, TRAF5, MEK4(MAP2K4)                                                                                                                                     |
| Regulation of GSK3 beta in bipolar disorder                                                                   | 46    | 1.36E-05 | 1.91E-03 | 12      | IL-1RI, MEK1/2, Shc, PP2A regulatory, AKT1, PP2A catalytic, AKT(PKB), IPP-2, FRAT1, Dsh, PPI-cat, DVL-1                                                                                                                                  |
| Neurophysiological process_Dynein-dynactin motor complex in axonal transport in neurons                       | 54    | 1.55E-05 | 1.97E-03 | 13      | Ubiquitin, Importin (karyopherin)-alpha, Importin (karyopherin)-beta, CDK5, Centractins, NudE, DYNLL, AKT(PKB), Snapin, Dynein 1, cytoplasmic, intermediate chains, DYI2, NUDEL, Tubulin (in microtubules)                               |
| Cell cycle_Spindle assembly and chromosome separation                                                         | 33    | 1.70E-05 | 1.99E-03 | 10      | Ubiquitin, Importin (karyopherin)-alpha, DCTN2, Importin (karyopherin)-beta, HEC, Kid, Tubulin alpha, ZW10, Dynein 1, cytoplasmic, intermediate chains, Tubulin (in microtubules)                                                        |
| Translation_Insulin regulation of translation                                                                 | 42    | 2.99E-05 | 3.01E-03 | 11      | MEK1(MAP2K1), eIF4B, eIF4H, Shc, eEF2, p70 S6 kinase1, eIF2B5, AKT(PKB), RPS6, PPI-cat, eIF4A                                                                                                                                            |
| dCTP/dUTP metabolism                                                                                          | 74    | 3.20E-05 | 3.01E-03 | 15      | POLE1, PD-ECGF (TdRpase), DCTD, POLA2, AK2, POLE4, NDPK 7, DNA polymerase beta, POLD reg (p50), POLD cat (p125), POLG cat, DNA polymerase lambda, KCY, NDPK 6, POLG reg                                                                  |
| Chemotaxis_Lysophosphatidic acid signaling via GPCRs                                                          | 129   | 3.22E-05 | 3.01E-03 | 21      | SIVA1, RhoA, Beta-catenin, MEK1/2, G-protein beta/gamma, Rho GTPase, G-protein alpha-12 family, PAK, AKT1, p70 S6 kinase1, Caspase-9, PKC, AKT(PKB), PKC-delta, TRIP6, Caspase-3, PLC-delta 1, Cofilin, IP3 receptor, MEK4(MAP2K4), PRK1 |
| Cytoskeleton remodeling_Regulation of actin cytoskeleton organization by the kinases effectors of Rho GTPases | 58    | 3.51E-05 | 3.01E-03 | 13      | ARPC1B, RhoA, RhoA-related, PAK, Cofilin, non-muscle, PAK1, Cdc42 subfamily, RhoJ, RhoC, MSN (moesin), ERM proteins, Cofilin, PRK1                                                                                                       |
| Role of IFN-beta in activation of T cell apoptosis in multiple sclerosis                                      | 29    | 3.65E-05 | 3.01E-03 | 9       | c-IAP2, PP2A catalytic, Survivin, Caspase-9, AKT(PKB), PP2A cat (alpha), c-IAP1, Adenosine A2a receptor, Caspase-3                                                                                                                       |
| TTP metabolism                                                                                                | 68    | 4.87E-05 | 3.57E-03 | 14      | POLE1, PD-ECGF (TdRpase), POLA2, Thymidylate kinase, POLE4, NDPK 7, DNA polymerase beta, POLD reg (p50), POLD cat (p125), TYSY, POLG cat, DNA polymerase lambda, NDPK 6, POLG reg                                                        |
| Signal transduction_mTORC1 downstream signaling                                                               | 60    | 5.13E-05 | 3.57E-03 | 13      | BAD, eIF4B, eEF2, p70 S6 kinases, HMGCs2, p70 S6 kinase1, G6PD, HIF1A, RPS6, PFKP, SIN1, eIF4A, PDIP46                                                                                                                                   |
| Transport_RAN regulation pathway                                                                              | 18    | 5.32E-05 | 3.57E-03 | 7       | NUP54, Importin (karyopherin)-alpha, RANBP3, Importin (karyopherin)-beta, NTF2, SUMO-1, E2I                                                                                                                                              |
| CFTR folding and maturation (normal and CF)                                                                   | 24    | 5.60E-05 | 3.57E-03 | 8       | DNAJB6 (Hdj-1), PARP-1, Hdj-2, Csp, Sti1, Aha1, HSPBP1, p23 co-chaperone                                                                                                                                                                 |
| Prolactin/ JAK2 signaling in breast cancer                                                                    | 24    | 5.60E-05 | 3.57E-03 | 8       | SPHK1, STAT5, PAK1, SK4/IK1, SHP-2, STAT5B, PKM2, Cyclophilin A                                                                                                                                                                          |
| Mechanisms of drug resistance in SCLC                                                                         | 70    | 6.81E-05 | 4.16E-03 | 14      | BAD, VCAM1, p70 S6 kinase1, Survivin, Caspase-9, AKT(PKB), Collagen IV, CD81, Rad51, c-IAP1, RPS6, tBid, Caspase-3, Bid                                                                                                                  |
| Signal transduction_Adenosine A2B receptor signaling pathway                                                  | 71    | 8.02E-05 | 4.69E-03 | 14      | Cullin 1, Ubiquitin, JAB1, MEK1/2, G-protein beta/gamma, PKA-reg (cAMP-dependent), PKC, AKT(PKB), LDHA, HIF1A, VASP, IP3 receptor, PKM2, VIL2 (ezrin)                                                                                    |
| Apoptosis and survival_Ubiquitination and phosphorylation in TNF-alpha-induced NF-kB signaling                | 39    | 8.36E-05 | 4.69E-03 | 10      | SPHK1, Ubiquitin, Sharpin, c-IAP2, E2N(UBC13), TAB2, PKC-delta, c-IAP1, RBCK1, UBE2D3                                                                                                                                                    |
| GTP-XTP metabolism                                                                                            | 90    | 9.43E-05 | 5.09E-03 | 16      | POLR2C, POLR2B, POLR1B, RPB6, POLR2G, NDPK 7, RPA39, RRP4, RRP42, GMP2, HPRT, POLR3K, NDPK 6, POLR3A, GUAC, PNPB                                                                                                                         |
| HGF signaling in colorectal cancer                                                                            | 64    | 1.04E-04 | 5.10E-03 | 13      | COX-2 (PTGS2), Beta-catenin, MEK1/2, Shc, PLAUR (uPAR), AKT1, p70 S6 kinase1, LAMC2, AKT(PKB), CD44, SHP-2, TIMP1, VIL2 (ezrin)                                                                                                          |
| dGTP metabolism                                                                                               | 64    | 1.04E-04 | 5.10E-03 | 13      | POLE1, POLA2, POLE4, NDPK 7, DNA polymerase beta, POLD reg (p50), POLD cat (p125), POLG cat, DGUOK, DNA polymerase lambda, NDPK 6, POLG reg, PNPB                                                                                        |
| Immune response_IL-1 signaling pathway                                                                        | 82    | 1.11E-04 | 5.10E-03 | 15      | CCL5, COX-2 (PTGS2), SPHK1, IL-1RI, MEK1/2, TPL2(MAP3K8), c-IAP2, AKT(PKB), IRF1, ECSIT, CD44, PLAU (UPA), MEK4/7, IRAK1, MEK4(MAP2K4)                                                                                                   |
| Apoptosis and survival_Regulation of Apoptosis by Mitochondrial Proteins                                      | 33    | 1.13E-04 | 5.10E-03 | 9       | BAD, Caspase-9, VDAC 2, Bik, Bak, ANT, tBid, MAP1, Bid                                                                                                                                                                                   |
| Development_Adiponectin signaling                                                                             | 48    | 1.13E-04 | 5.10E-03 | 11      | MEK1(MAP2K1), AdipoR2, Shc, Calmodulin, AKT(PKB), LKB1, HSP90, AdipoR1, Caspase-3, APPL1, IP3 receptor                                                                                                                                   |
| ATP/ITP metabolism                                                                                            | 123   | 1.55E-04 | 6.81E-03 | 19      | POLR2C, POLR2B, POLR1B, RPB6, AK2, POLR2G, ADSSL1, NDPK 7, RPA39, RRP4, Adenosine kinase, RRP42, ADSS, HPRT, POLR3K, NDPK 6, ADSL, POLR3A, PNPB                                                                                          |

|                                                                                                                  |     |          |          |    |                                                                                                                                                                                 |
|------------------------------------------------------------------------------------------------------------------|-----|----------|----------|----|---------------------------------------------------------------------------------------------------------------------------------------------------------------------------------|
| Apoptosis and survival_BAD phosphorylation                                                                       | 42  | 1.64E-04 | 6.97E-03 | 10 | BAD, MEK1(MAP2K1), Shc, G-protein beta/gamma, PKA-reg (cAMP-dependent), p70 S6 kinase1, PP2C, PP2A catalytic, AKT(PKB), PP1-cat alpha                                           |
| Immune response_BAFF-induced signaling                                                                           | 51  | 2.01E-04 | 8.30E-03 | 11 | BAD, Ubiquitin, MEK1/2, AKT1, p70 S6 kinase1, Bcl-10, AKT(PKB), TRIM2, PKC-delta, RPS6, MEK4(MAP2K4)                                                                            |
| Cytoskeleton remodeling_Substance P mediated membrane blebbing                                                   | 16  | 2.36E-04 | 9.48E-03 | 6  | RhoA, G-protein alpha-12 family, Tubulin alpha, PAK1, Substance P receptor, Tubulin (in microtubules)                                                                           |
| Translation_Translation regulation by Alpha-1 adrenergic receptors                                               | 53  | 2.88E-04 | 1.12E-02 | 11 | MEK1(MAP2K1), RhoA, Shc, G-protein beta/gamma, eEF2, p70 S6 kinase1, Calmodulin, PKC- delta, eIF4A, IP3 receptor, PRK1                                                          |
| Translation_Regulation of EIF4F activity                                                                         | 54  | 3.42E-04 | 1.27E-02 | 11 | MEK1(MAP2K1), eIF4B, eIF4H, Shc, p70 S6 kinase1, PP2A catalytic, PAK1, AKT(PKB), eIF4G2, eIF4A, MEK4(MAP2K4)                                                                    |
| CHDI_DEGs from Replication data_Causal network                                                                   | 81  | 3.45E-04 | 1.27E-02 | 14 | MEK1(MAP2K1), RhoA, Beta-catenin, Shc, LTBR(TNFRSF3), CDK5, Calmodulin, PKC, AKT(PKB), PKC-delta, Dsh, PP1-cat, IP3 receptor, MEK4(MAP2K4)                                      |
| Tau pathology in Alzheimer disease                                                                               | 55  | 4.04E-04 | 1.41E-02 | 11 | Ubiquitin, CDK5, VCP, PP2C, PP2A catalytic, Syndecan-1, Caspase-9, PKC, Calpain 2(m), Caspase-3, Tubulin (in microtubules)                                                      |
| Apoptosis and survival_Role of IAP-proteins in apoptosis                                                         | 31  | 4.11E-04 | 1.41E-02 | 8  | Ubiquitin, c-IAP2, Survivin, Caspase-9, c-IAP1, tBid, Caspase-3, Bid                                                                                                            |
| NETosis in SLE                                                                                                   | 31  | 4.11E-04 | 1.41E-02 | 8  | Pin1, PKC, Histone H3, HMGB1, Histone H2, Histone H2A, Histone H1.2, Histone H4                                                                                                 |
| Regulation of lipid metabolism_Insulin signaling: generic cascades                                               | 47  | 4.37E-04 | 1.46E-02 | 10 | MEK1(MAP2K1), eIF4B, Shc, eEF2, PKA-reg (cAMP-dependent), p70 S6 kinase1, eIF2B5, AKT(PKB), RPS6, PP1-cat                                                                       |
| Development_VEGF signaling via VEGFR2 - generic cascades                                                         | 93  | 4.66E-04 | 1.52E-02 | 15 | COX-2 (PTGS2), SPHK1, MEK1(MAP2K1), RhoA, Beta-catenin, Shc, PLAUR (uPAR), Calmodulin, PKC, PAK1, AKT(PKB), HSP90, PLA2G5, PLAU (UPA), IP3 receptor                             |
| HSP70 and HSP40-dependent folding in Huntington's disease                                                        | 25  | 5.52E-04 | 1.74E-02 | 7  | Ubiquitin, PSMD1, DNAJB6 (Hdj-1), Hdj-2, HSP90, CHIP, Sti1                                                                                                                      |
| Signal transduction_Angiotensin II signaling via Beta-arrestin                                                   | 57  | 5.57E-04 | 1.74E-02 | 11 | BAD, MEK1(MAP2K1), RhoA, p70 S6 kinases, PP2A catalytic, AKT(PKB), AP-2 alpha subunits, SET, Cofilin, p23 co-chaperone, MEK4(MAP2K4)                                            |
| Signal transduction_Soluble CXCL16 signaling                                                                     | 49  | 6.21E-04 | 1.90E-02 | 10 | RhoA, MEK1/2, G-protein beta/gamma, CXCL16, p70 S6 kinase1, AKT(PKB), CD44, HIF1A, P-selectin, Cofilin                                                                          |
| IGF family, invasion and metastasis in colorectal cancer                                                         | 33  | 6.48E-04 | 1.90E-02 | 8  | RhoA, Beta-catenin, PLAUR (uPAR), Collagen IV, PKC-delta, IGF-2, PLAU (UPA), Alpha-1 catenin                                                                                    |
| Development_Prolactin receptor signaling                                                                         | 58  | 6.51E-04 | 1.90E-02 | 11 | MEK1(MAP2K1), RhoA, OAS1, Shc, STAT5, AKT(PKB), IRF1, PKC-delta, SHP-2, NMI, VAV-1                                                                                              |
| Development_Thromboxane A2 signaling pathway                                                                     | 50  | 7.35E-04 | 1.95E-02 | 10 | RhoA, Beta-catenin, MEK1/2, G-protein alpha-12 family, PKA-reg (cAMP-dependent), p70 S6 kinase1, PKC, AKT(PKB), IP3 receptor, G-protein alpha-13                                |
| Apoptosis and survival_HTR1A signaling                                                                           | 50  | 7.35E-04 | 1.95E-02 | 10 | MEK1(MAP2K1), Shc, G-protein beta/gamma, PP2A regulatory, PKA-reg (cAMP-dependent), PARP-1, PP2A catalytic, Calmodulin, AKT(PKB), Caspase-3                                     |
| The role of PTEN and PI3K signaling in melanoma                                                                  | 50  | 7.35E-04 | 1.95E-02 | 10 | BAD, Epo receptor, Beta-catenin, AKT1, p70 S6 kinase1, Survivin, Caspase-9, AKT(PKB), RhoC, Caspase-3                                                                           |
| Signal transduction_mTORC2 downstream signaling                                                                  | 68  | 7.41E-04 | 1.95E-02 | 12 | BAD, PRAS40, RhoA, Beta-catenin, PKA-reg (cAMP-dependent), AKT1, PKC, AKT(PKB), STK4, PKC-delta, IGF-2, Rab-10                                                                  |
| Inhibition of apoptosis in gastric cancer                                                                        | 42  | 7.95E-04 | 1.95E-02 | 9  | BAD, c-IAP2, Caspase-9, PAK1, AKT(PKB), c-IAP1, tBid, Caspase-3, Bid                                                                                                            |
| Chemoresistance pathways mediated by constitutive activation of PI3K pathway and BCL-2 in small cell lung cancer | 42  | 7.95E-04 | 1.95E-02 | 9  | p70 S6 kinase1, PARP-1, LAMC2, Survivin, Caspase-9, AKT(PKB), Collagen IV, RPS6, Caspase-3                                                                                      |
| Apoptosis and survival_Role of CDK5 in neuronal death and survival                                               | 34  | 8.03E-04 | 1.95E-02 | 8  | BAD, MEK1(MAP2K1), Shc, CDK5, Caspase-9, AKT(PKB), PKC-delta, Caspase-3                                                                                                         |
| Role of Apo-2L(TNFSF10) in Prostate Cancer cell apoptosis                                                        | 34  | 8.03E-04 | 1.95E-02 | 8  | c-IAP2, Survivin, Caspase-9, Bak, c-IAP1, tBid, Caspase-3, Bid                                                                                                                  |
| Development_Role of CDK5 in neuronal development                                                                 | 34  | 8.03E-04 | 1.95E-02 | 8  | Beta-catenin, DCTN2, CDK5, Pin1, AKT(PKB), Dynein 1, cytoplasmic, intermediate chains, NUDEL, Tubulin (in microtubules)                                                         |
| Oxidative stress_ROS-induced cellular signaling                                                                  | 108 | 8.04E-04 | 1.95E-02 | 16 | GSTP1, COX-2 (PTGS2), Thioredoxin, PKA-reg (cAMP-dependent), HIF-prolyl hydroxylase, p70 S6 kinase1, Pin1, GPX1, PKC, AKT(PKB), LKB1, Bak, HIF1A, NRF2, E2I, DLC1 (Dynein LC8a) |
| Chemotaxis_SDF-1/ CXCR4-induced chemotaxis of immune cells                                                       | 79  | 9.00E-04 | 2.14E-02 | 13 | RhoA, MEK1/2, Shc, G-protein beta/gamma, PKA-reg (cAMP-dependent), VCAM1, PAK, p70 S6 kinase1, PAK1, AKT(PKB), VAV-1, Cofilin, G-protein alpha-13                               |
| Apoptosis and survival_TNF-alpha-induced Caspase-8 signaling                                                     | 43  | 9.53E-04 | 2.23E-02 | 9  | PP2A regulatory, AKT1, PP2A catalytic, Caspase-9, AKT(PKB), HSP90, tBid, Caspase-3, Bid                                                                                         |
| Inhibition of remyelination in multiple sclerosis: regulation of cytoskeleton proteins                           | 44  | 1.13E-03 | 2.59E-02 | 9  | Tubulin beta, RhoA, CDK5, Tubulin alpha, PAK1, VAV-1, Stathmin, Cofilin, Tubulin (in microtubules)                                                                              |
| Immune response_M-CSF-receptor signaling pathway                                                                 | 81  | 1.15E-03 | 2.59E-02 | 13 | MEK1(MAP2K1), RhoA, Beta-catenin, Shc, Calmodulin, PKC, AKT(PKB), Tyk2, STAT5B, PRIM2A, VAV-1, PLAU (UPA), IP3 receptor                                                         |
| Effect of H. pylori infection on apoptosis in gastric epithelial cells                                           | 53  | 1.18E-03 | 2.64E-02 | 10 | COX-2 (PTGS2), c-IAP2, PARP-1, Caspase-9, Bak, PTPR-alpha, c-IAP1, tBid, Caspase-3, Bid                                                                                         |
| Possible regulation of HSF-1/ chaperone pathway in Huntington's disease                                          | 21  | 1.23E-03 | 2.70E-02 | 6  | Calmodulin, HSP90, PLA2, E2I, SUMO-2, p23 co-chaperone                                                                                                                          |
| Apoptosis and survival_CXCR3-B signaling                                                                         | 63  | 1.33E-03 | 2.81E-02 | 11 | G-protein beta/gamma, PKA-reg (cAMP-dependent), MCU, PARP-1, Survivin, Caspase-9, IDO2, NRF2, Calpain 2(m), Caspase-3, IP3 receptor                                             |
| Transcription_Sirtuin6 regulation                                                                                | 63  | 1.33E-03 | 2.81E-02 | 11 | Ubiquitin, c-IAP2, PARP-1, Histone H3, Sirtuin6, LKB1, CHIP, LDHA, HIF1A, LDLR, GPIAP1                                                                                          |

and functions

|                                                                                                                                               |     |          |          |    |                                                                                                                                                          |
|-----------------------------------------------------------------------------------------------------------------------------------------------|-----|----------|----------|----|----------------------------------------------------------------------------------------------------------------------------------------------------------|
| Cell adhesion_Histamine H1 receptor signaling in the interruption of cell barrier integrity                                                   | 45  | 1.34E-03 | 2.81E-02 | 9  | RhoA, Beta-catenin, G-protein beta/gamma, GEFT, Calmodulin, PKC-delta, Alpha-catenin, Cofilin, IP3 receptor                                              |
| Development_FGFR signaling pathway                                                                                                            | 54  | 1.37E-03 | 2.84E-02 | 10 | Ubiquitin, MEK1(MAP2K1), Shc, Syndecan-1, PAK1, AKT(PKB), PKC-delta, SHP-2, IP3 receptor, MEK4(MAP2K4)                                                   |
| Cell cycle_Role of SCF complex in cell cycle regulation                                                                                       | 29  | 1.45E-03 | 2.95E-02 | 7  | Cullin 1, Ubiquitin, CDC25A, RING-box protein 1, CKS1, NEDD8, CDC34                                                                                      |
| Signal transduction_CXCR4 signaling via PI3K cascade                                                                                          | 46  | 1.58E-03 | 3.01E-02 | 9  | BAD, Ubiquitin, Beta-catenin, G-protein beta/gamma, AKT1, p70 S6 kinase1, PARP-1, AKT(PKB), Caspase-3                                                    |
| Role of GIP in pathogenesis of type 2 diabetes                                                                                                | 46  | 1.58E-03 | 3.01E-02 | 9  | BAD, Ubiquitin, MEK1/2, PKA-reg (cAMP-dependent), PP2A catalytic, Caspase-9, AKT(PKB), Caspase-3, MEK4(MAP2K4)                                           |
| Signal transduction_Calcium signaling                                                                                                         | 46  | 1.58E-03 | 3.01E-02 | 9  | CaMK I, RhoA, G-protein beta/gamma, PP2A catalytic, Calmodulin, CD44, PP1-cat, IP3 receptor, VIL2 (ezrin)                                                |
| Cell adhesion_ECM remodeling                                                                                                                  | 55  | 1.59E-03 | 3.01E-02 | 10 | PLAUR (uPAR), Collagen IV, CD44, Caveolin-2, MSN (moesin), MMP-16, IGF-2, PLAU (UPA), TIMP1, VIL2 (ezrin)                                                |
| Immune response_IL-6 signaling pathway via MEK/ERK and PI3K/AKT cascades                                                                      | 74  | 1.60E-03 | 3.01E-02 | 12 | BAD, MEK1/2, Shc, p70 S6 kinase1, Caspase-9, AKT(PKB), Proepithelin, PKC-delta, SHP-2, RPS6, VAV-1, IP3 receptor                                         |
| Ubiquitin-proteasome system in Huntington's disease                                                                                           | 22  | 1.61E-03 | 3.01E-02 | 6  | PSMC2, Ubiquitin, PSMB9, CHIP, HIP-2, CDC34                                                                                                              |
| TNF-alpha and IL-1 beta-mediated regulation of contraction and secretion of inflammatory factors in normal and asthmatic airway smooth muscle | 65  | 1.74E-03 | 3.18E-02 | 11 | CCL5, COX-2 (PTGS2), IL-1RI, GRO-2, RhoA, VCAM1, Calmodulin, Histone H3, AKT(PKB), PLA2, Histone H4                                                      |
| Signal transduction_Cyclic AMP signaling                                                                                                      | 38  | 1.74E-03 | 3.18E-02 | 8  | KDELRL, G-protein beta/gamma, PKA-reg (cAMP-dependent), Calmodulin, PKC, PHK alpha, PKC-delta, PHK gamma                                                 |
| Apoptosis and survival_Endoplasmic reticulum stress response pathway                                                                          | 56  | 1.83E-03 | 3.26E-02 | 10 | GADD34, eIF2S1, Caspase-9, Bak, Calpain 2(m), PP1-cat, tBid, PP1-cat alpha, MEK4(MAP2K4), Bid                                                            |
| Role of FSH and Lutropin in ovarian cancer                                                                                                    | 56  | 1.83E-03 | 3.26E-02 | 10 | COX-2 (PTGS2), MEK1/2, PKA-reg (cAMP-dependent), Survivin, AKT(PKB), CD44, HIF1A, PKC-delta, NRF2, APPL1                                                 |
| CTP/UTP metabolism                                                                                                                            | 107 | 2.04E-03 | 3.47E-02 | 15 | POLR2C, PD-ECGF (TdRpase), POLR2B, POLR1B, RPB6, AK2, POLR2G, NDPK 7, RPA39, RRP4, RRP42, POLR3K, KCY, NDPK 6, POLR3A                                    |
| Role of alpha-V/ beta-6 integrin in colorectal cancer                                                                                         | 23  | 2.07E-03 | 3.47E-02 | 6  | MEK1/2, Caspase-9, PKC, Collagen IV, PLAU (UPA), Caspase-3                                                                                               |
| Proteolysis_Putative ubiquitin pathway                                                                                                        | 23  | 2.07E-03 | 3.47E-02 | 6  | Cullin 1, Ubiquitin, E2N(UBC13), RING-box protein 1, UBCH8, CHIP                                                                                         |
| Signal transduction_Leptin signaling via JAK/STAT and MAPK cascade                                                                            | 39  | 2.08E-03 | 3.47E-02 | 8  | MEK1/2, STAT5, Caspase-9, SHP-2, STAT5B, RPS6, Caspase-3, TIMP1                                                                                          |
| Regulation of lipid metabolism_Insulin regulation of glycogen metabolism                                                                      | 57  | 2.10E-03 | 3.47E-02 | 10 | MEK1(MAP2K1), Shc, PKA-reg (cAMP-dependent), Calmodulin, AKT(PKB), PHK alpha, PP1- cat, PHK gamma (muscle), GYS1, PHK gamma                              |
| Lysophospholipid mediators-induced inflammatory signaling in normal and asthmatic airway epithelium                                           | 57  | 2.10E-03 | 3.47E-02 | 10 | CCL5, COX-2 (PTGS2), SPHK1, RhoA, MEK1/2, G-protein beta/gamma, G-protein alpha-12 family, AKT(PKB), IRF1, PKC-delta                                     |
| Signal transduction_Adenosine A3 receptor signaling pathway                                                                                   | 48  | 2.16E-03 | 3.48E-02 | 9  | BAD, MEK1/2, G-protein beta/gamma, Rho GTPase, PKC, AKT(PKB), HIF1A, PKC-delta, IP3 receptor                                                             |
| GLP-1 in beta cell apoptosis in type 2 diabetes                                                                                               | 48  | 2.16E-03 | 3.48E-02 | 9  | BAD, IL-1RI, Thioredoxin, c-IAP2, PKA-reg (cAMP-dependent), AKT1, Caspase-9, IGF-2, Caspase-3                                                            |
| Role of neuropeptides in pathogenesis of SCLC                                                                                                 | 67  | 2.23E-03 | 3.56E-02 | 11 | MEK1/2, Shc, G-protein beta/gamma, G-protein alpha-12 family, p70 S6 kinase1, PKC, AKT(PKB), PKC-delta, V1a receptor, Substance P receptor, IP3 receptor |
| Apoptosis and survival_NGF/ TrkA PI3K-mediated signaling                                                                                      | 77  | 2.27E-03 | 3.57E-02 | 12 | BAD, RhoA, Shc, AKT1, p70 S6 kinase1, Cofilin, non-muscle, Calmodulin, PAK1, AKT(PKB), MSN (moesin), Cofilin, Tubulin (in microtubules)                  |
| Immune response_IL-33 signaling pathway                                                                                                       | 58  | 2.41E-03 | 3.68E-02 | 10 | Ubiquitin, MEK1/2, VCAM1, TAB2, AKT(PKB), Histone H2A, IL-33, Histone H2B, IRAK1, MEK4(MAP2K4)                                                           |
| Apoptosis and survival_Ceramides signaling pathway                                                                                            | 40  | 2.46E-03 | 3.68E-02 | 8  | BAD, MEK1(MAP2K1), PP2A catalytic, AKT(PKB), tBid, Caspase-3, MEK4(MAP2K4), Bid                                                                          |
| CHDI_Correlations from Replication data_Causal network (negative correlations)                                                                | 40  | 2.46E-03 | 3.68E-02 | 8  | RhoA, Beta-catenin, PLAUR (uPAR), PKC, AKT(PKB), Collagen IV, Dsh, PLAU (UPA)                                                                            |
| Tissue Factor signaling in cancer via PAR1 and PAR2                                                                                           | 49  | 2.50E-03 | 3.68E-02 | 9  | MEK1(MAP2K1), Shc, G-protein alpha-12 family, p70 S6 kinase1, AKT(PKB), Tissue factor, SHP-2, STAT5B, IP3 receptor                                       |
| Development_G-CSF signaling                                                                                                                   | 49  | 2.50E-03 | 3.68E-02 | 9  | MEK1(MAP2K1), Shc, STAT5, c-IAP2, G-CSF receptor, Survivin, AKT(PKB), Tyk2, SHP-2                                                                        |
| Immune response_Sublytic effects of membrane attack complex                                                                                   | 68  | 2.52E-03 | 3.68E-02 | 11 | BAD, RhoA, MEK1/2, G-protein beta/gamma, MCU, AKT1, eIF2S1, PKC, AKT(PKB), IRF1, IP3 receptor                                                            |
| Eosinophil adhesion and transendothelial migration in asthma                                                                                  | 68  | 2.52E-03 | 3.68E-02 | 11 | CCL5, Galectin-3, PLAUR (uPAR), VCAM1, Calmodulin, PKC, Collagen IV, CD44, PKC-delta, P-selectin, PLAU (UPA)                                             |
| Cell cycle_Role of Nek in cell cycle regulation                                                                                               | 32  | 2.67E-03 | 3.82E-02 | 7  | Tubulin beta, NEK6, HEC, p70 S6 kinase1, Tubulin alpha, Histone H3, Tubulin (in microtubules)                                                            |

|                                                                                                    |     |          |          |    |                                                                                                                                                               |
|----------------------------------------------------------------------------------------------------|-----|----------|----------|----|---------------------------------------------------------------------------------------------------------------------------------------------------------------|
| Epithelial cell apoptosis in COPD                                                                  | 32  | 2.67E-03 | 3.82E-02 | 7  | BAD, PSMA1, Caspase-9, PSMB6, AKT(PKB), NRF2, NIP3                                                                                                            |
| Development_Negative regulation of WNT/Beta-catenin signaling in the nucleus                       | 89  | 2.74E-03 | 3.84E-02 | 13 | Beta-catenin, RANBP3, AKT1, TAB2, NARF, HBP1, Oct-3/4, VHL, PKC-delta, Nitrilase 1, Dsh, PGAM5, Alpha-1 catenin                                               |
| Oxidative stress_Activation of NADPH oxidase                                                       | 59  | 2.74E-03 | 3.84E-02 | 10 | MEK1/2, G-protein beta/gamma, AKT1, Pin1, PKC, PAK1, AKT(PKB), PKC-delta, VAV-1, IP3 receptor                                                                 |
| LRRK2 in neuronal apoptosis in Parkinson's disease                                                 | 17  | 2.77E-03 | 3.84E-02 | 5  | Thioredoxin, AKT1, Caspase-9, ANT, Caspase-3                                                                                                                  |
| CHDI_Correlations from Replication data_Causal network (positive correlations)                     | 79  | 2.83E-03 | 3.84E-02 | 12 | PSMC2, IL-1RI, RhoA, G-protein beta/gamma, IRAK1/2, Calmodulin, AKT(PKB), CD44, Caspase-3, IP3 receptor, MEK4(MAP2K4), VIL2 (ezrin)                           |
| Development_IGF-1 receptor signaling                                                               | 50  | 2.89E-03 | 3.84E-02 | 9  | BAD, MEK1(MAP2K1), Shc, p70 S6 kinase1, Caspase-9, AKT(PKB), RPS6, IGF-2, GYS1                                                                                |
| Development_GM-CSF signaling                                                                       | 50  | 2.89E-03 | 3.84E-02 | 9  | BAD, MEK1(MAP2K1), RACK1, Shc, STAT5, Caspase-9, AKT(PKB), SHP-2, Caspase-3                                                                                   |
| IGF-1 signaling in multiple myeloma                                                                | 50  | 2.89E-03 | 3.84E-02 | 9  | BAD, RhoA, MEK1/2, Shc, c-IAP2, p70 S6 kinase1, Survivin, AKT(PKB), HIF1A                                                                                     |
| Cytoskeleton remodeling_Role of PKA in cytoskeleton reorganisation                                 | 41  | 2.90E-03 | 3.84E-02 | 8  | RhoA, G-protein beta/gamma, PKA-reg (cAMP-dependent), Calmodulin, PAK1, VASP, Cofilin, IP3 receptor                                                           |
| IGF family signaling in colorectal cancer                                                          | 60  | 3.12E-03 | 3.95E-02 | 10 | COX-2 (PTGS2), GIPC, Beta-catenin, MEK1/2, Shc, p70 S6 kinase1, AKT(PKB), HIF1A, Rad51, IGF-2                                                                 |
| Signal transduction_MIF signaling pathway                                                          | 60  | 3.12E-03 | 3.95E-02 | 10 | BAD, COX-2 (PTGS2), MEK1/2, G-protein beta/gamma, VCAM1, AKT(PKB), SPPL2a, CD44, PRDX1, NRF2                                                                  |
| Main pathways of Schwann cells transformation in neurofibromatosis type 1                          | 80  | 3.14E-03 | 3.95E-02 | 12 | BAD, MEK1(MAP2K1), Beta-catenin, MEK1/2, p70 S6 kinase1, Calmodulin, PAK1, AKT(PKB), HIF1A, RPS6, VAV-1, IP3 receptor                                         |
| Stellate cells activation and liver fibrosis                                                       | 70  | 3.18E-03 | 3.95E-02 | 11 | IL-1RI, GRO-2, MEK1(MAP2K1), Beta-catenin, Shc, IRAK1/2, GLI-1, AKT(PKB), SMAD2, Dsh, TIMP1                                                                   |
| Aminoglycoside- and cisplatin-induced hair cell death                                              | 112 | 3.20E-03 | 3.95E-02 | 15 | COX-2 (PTGS2), Beta-catenin, Shc, NOL3, PARP-1, Caspase-9, PKC, Histone H3, Calpain 2(m), Histone H2A, Histone H2B, Histone H4, Caspase-3, MEK4(MAP2K4), ACON |
| Role of metalloproteases and heparanase in progression of pancreatic cancer                        | 33  | 3.21E-03 | 3.95E-02 | 7  | MEK1(MAP2K1), Shc, Collagen IV, CD44, CD44 soluble, TIMP1, CD44 (EXT)                                                                                         |
| Apoptosis and survival_Granzyme B signaling                                                        | 33  | 3.21E-03 | 3.95E-02 | 7  | PARP-1, Tubulin alpha, Caspase-9, tBid, Caspase-3, LAMP2, Bid                                                                                                 |
| Resistance of pancreatic cancer cells to death receptor signaling                                  | 33  | 3.21E-03 | 3.95E-02 | 7  | c-IAP2, Survivin, Caspase-9, c-IAP1, tBid, Caspase-3, Bid                                                                                                     |
| Development_Glucocorticoid receptor signaling                                                      | 25  | 3.26E-03 | 3.95E-02 | 6  | STAT5, HSP90, SUMO-1, FKBP4, E2I, p23 co-chaperone                                                                                                            |
| Defective macrophage-mediated bacterial phagocytosis in COPD                                       | 25  | 3.26E-03 | 3.95E-02 | 6  | CR1, Tubulin alpha, AKT(PKB), SR-BI, NRF2, Tubulin (in microtubules)                                                                                          |
| HIF-1 in gastric cancer                                                                            | 51  | 3.33E-03 | 3.99E-02 | 9  | COX-2 (PTGS2), Ubiquitin, PDF, PGES2, AKT(PKB), HSP90, LDHA, VHL, HIF1A                                                                                       |
| Development_c-Kit ligand signaling pathway during hemopoiesis                                      | 61  | 3.53E-03 | 4.20E-02 | 10 | BAD, MEK1/2, Shc, DOK1, STAT5, p70 S6 kinase1, AKT(PKB), SHP-2, VAV-1, IP3 receptor                                                                           |
| Regulation of lipid metabolism_Alpha-1 adrenergic receptors signaling via arachidonic acid         | 71  | 3.57E-03 | 4.21E-02 | 11 | COX-2 (PTGS2), RhoA, MEK1/2, Shc, G-protein beta/gamma, Calmodulin, PGES2, LPP2, LPP1, IP3 receptor, PRK1                                                     |
| Development_The role of GDNF ligand family/RET receptor in cell survival, growth and proliferation | 92  | 3.68E-03 | 4.31E-02 | 13 | RhoA, MEK1/2, Shc, DOK1, Calmodulin, CREM (activators), AKT(PKB), HIF1A, ARTN, SHP-2, Cofilin, IP3 receptor, MEK4(MAP2K4)                                     |
| Signal transduction_AKT signaling                                                                  | 43  | 3.95E-03 | 4.39E-02 | 8  | BAD, p70 S6 kinase1, PP2A catalytic, Caspase-9, AKT(PKB), HSP90, RPS6, GYS1                                                                                   |
| Immune response_Substance P-stimulated expression of proinflammatory cytokines via MAPKs           | 43  | 3.95E-03 | 4.39E-02 | 8  | COX-2 (PTGS2), GRO-2, MEK1/2, G-protein beta/gamma, AKT(PKB), PKC-delta, Substance P receptor, IP3 receptor                                                   |
| Apoptosis and survival_TNFR1 signaling pathway                                                     | 43  | 3.95E-03 | 4.39E-02 | 8  | c-IAP2, jBid, Caspase-9, c-IAP1, tBid, Caspase-3, MEK4(MAP2K4), Bid                                                                                           |
| Muscle contraction_Oxytocin signaling in uterus and mammary gland                                  | 62  | 3.98E-03 | 4.39E-02 | 10 | COX-2 (PTGS2), MEK1(MAP2K1), RhoA, G-protein beta/gamma, eEF2, PP2A catalytic, Calmodulin, PGES2, PKC, IP3 receptor                                           |
| Regulation of CFTR activity (normal and CF)                                                        | 62  | 3.98E-03 | 4.39E-02 | 10 | RACK1, PP2A regulatory, PKA-reg (cAMP-dependent), Annexin V, PP2C, PP2A catalytic, Syntaxin 1A, COMMD1 (MURR1), Tubulin (in microtubules), VIL2 (ezrin)       |
| Regulation of lipid metabolism_Stimulation of Arachidonic acid production by ACM receptors         | 72  | 3.98E-03 | 4.39E-02 | 11 | MEK1(MAP2K1), RhoA, G-protein beta/gamma, Calmodulin, PKC, PAK1, ARF1, LPP2, LPP1, IP3 receptor, G-protein alpha-13                                           |
| Nicotine / nAChR alpha-3/nAChR beta-2 signaling in NSCLC                                           | 26  | 4.03E-03 | 4.39E-02 | 6  | CDC18L (CDC6), AKT1, CDC25A, Survivin, AKT(PKB), TYSY                                                                                                         |
| Neurophysiological process_Dopamine D2 receptor transactivation of PDGFR in CNS                    | 26  | 4.03E-03 | 4.39E-02 | 6  | G-protein beta/gamma, PP2A regulatory, PP2A catalytic, Calmodulin, PKC, IP3 receptor                                                                          |
| Cell cycle_Transition and termination of DNA replication                                           | 26  | 4.03E-03 | 4.39E-02 | 6  | Ribonuclease H1, Ubiquitin, MCM2, POLD reg (p50), FEN1, POLD cat (p125)                                                                                       |

|                                                                              |     |          |          |    |                                                                                                                                                                         |
|------------------------------------------------------------------------------|-----|----------|----------|----|-------------------------------------------------------------------------------------------------------------------------------------------------------------------------|
| Apoptosis and survival_Role of PKR in stress-induced apoptosis               | 53  | 4.35E-03 | 4.56E-02 | 9  | PP2A regulatory, IRF3, PP2A catalytic, eIF2S1, TAB2, IRF1, Tyk2, ATF-3, Caspase-3                                                                                       |
| Regulation of VEGF expression in lung cancer                                 | 53  | 4.35E-03 | 4.56E-02 | 9  | COX-2 (PTGS2), IL-1RI, RhoA, p70 S6 kinase1, AKT(PKB), HSP90, RhoC, VHL, HIF1A                                                                                          |
| TLRs-mediated IFN-alpha production by plasmacytoid dendritic cells in SLE    | 53  | 4.35E-03 | 4.56E-02 | 9  | La protein, SNRPB (Sm-B), SSH3, p70 S6 kinase1, TAB2, AKT(PKB), HMGB1, SNRPD1 (SMD1), IRAK1                                                                             |
| Immune response_Induction of the antigen presentation machinery by IFN-gamma | 53  | 4.35E-03 | 4.56E-02 | 9  | PSMB9, IFNGR1, RFXANK, PSMB8(LMP7), NLR5, IRF1, Nucleophosmin, USF1, PSMB10                                                                                             |
| CHDI_Correlations from Discovery data_Causal network                         | 73  | 4.44E-03 | 4.56E-02 | 11 | MEK1(MAP2K1), Beta-catenin, Shc, G-protein beta/gamma, CDK5, Calmodulin, AKT(PKB), Dsh, Substance P receptor, IP3 receptor, TSC-22                                      |
| Neuroprotective action of lithium                                            | 63  | 4.48E-03 | 4.56E-02 | 10 | Thioredoxin, Beta-catenin, CDK5, IPP-2, FRAT1, P2X2, Dsh, PP1-cat, Caspase-3, MEK4(MAP2K4)                                                                              |
| Neurogenesis_NGF/TrkA MAPK-mediated signaling                                | 105 | 4.51E-03 | 4.56E-02 | 14 | SPHK1, MEK1/2, Shc, PLAUR (uPAR), PP2A regulatory, PKA-reg (cAMP-dependent), CDK5, PP2A catalytic, Calmodulin, PKC-delta, SHP-2, Ephrin-A receptor 2, SAC, IP3 receptor |
| Interleukins-induced inflammatory response in asthmatic airway fibroblasts   | 35  | 4.54E-03 | 4.56E-02 | 7  | CCL5, COX-2 (PTGS2), IL-1RI, GRO-2, MEK1/2, VCAM1, IL-33                                                                                                                |
| Anti-apoptotic action of Gastrin in gastric cancer                           | 35  | 4.54E-03 | 4.56E-02 | 7  | BAD, MEK1(MAP2K1), RhoA, Caspase-9, PAK1, Caspase-3, IP3 receptor                                                                                                       |
| IGF signaling in lung cancer                                                 | 44  | 4.58E-03 | 4.56E-02 | 8  | BAD, MEK1(MAP2K1), Shc, p70 S6 kinase1, Survivin, AKT(PKB), IGF-2, PLAU (UPA)                                                                                           |
| Development_Flt3 signaling                                                   | 44  | 4.58E-03 | 4.56E-02 | 8  | BAD, MEK1(MAP2K1), Shc, PAK1, AKT(PKB), SHP-2, VAV-1, MEK4(MAP2K4)                                                                                                      |
| Apoptosis and survival_FAS signaling cascades                                | 44  | 4.58E-03 | 4.56E-02 | 8  | PARP-1, Caspase-9, SUMO-1, c-IAP1, tBid, Caspase-3, MEK4(MAP2K4), Bid                                                                                                   |
| Translation_Regulation of translation initiation                             | 27  | 4.92E-03 | 4.82E-02 | 6  | RACK1, eIF3S7, p70 S6 kinase1, eIF3S4, RPS6, eIF4A                                                                                                                      |
| Ubiquinone metabolism                                                        | 74  | 4.94E-03 | 4.82E-02 | 11 | COQ3, NDUFS8, NDUFA11, NDUFS1, NDUFS3, DAP13, NDUFS2, NDUFS7, NDUFB6, NDUFA6, NDUFV3                                                                                    |
| NRF2 regulation of oxidative stress response                                 | 54  | 4.94E-03 | 4.82E-02 | 9  | GSTP1, Ubiquitin, MEK1(MAP2K1), Thioredoxin, PKC, AKT(PKB), PRDX1, NRF2, MEK4(MAP2K4)                                                                                   |

# Items with FDR < 0.05 were considered as significant ones.



**Supplementary Table 7. The significantly enriched metacore pathways for the 1551 down-regulated genes under siPde4d.**

| Maps                                                                                                                        | Total | p-value  | FDR      | In_Data | Network Objects from Active Data                                                                                                                                                                                                                                           |
|-----------------------------------------------------------------------------------------------------------------------------|-------|----------|----------|---------|----------------------------------------------------------------------------------------------------------------------------------------------------------------------------------------------------------------------------------------------------------------------------|
| Oxidative stress_ROS-induced cellular signaling                                                                             | 108   | 1.12E-10 | 1.50E-07 | 24      | NOTCH1 (NICD), ELAVL1 (HuR), p38alpha (MAPK14), SENP1, HSF1, PLK3 (CNK), PRKD1, PKA-reg (cAMP-dependent), JNK(MAPK8-10), HIF-prolyl hydroxylase, HDAC1, FIH-1, SAE2, Glutaredoxin 1, p21, Bak, Cytochrome c, MEKK1(MAP3K1), NRF2, E2I, p38 MAPK, IKK-beta, MDM2, TNF-alpha |
| Transcription_Negative regulation of HIF1A function                                                                         | 69    | 1.14E-08 | 7.62E-06 | 17      | PLK3 (CNK), SART1, FHL3, HIF-prolyl hydroxylase, EGLN2, MCM7, ARD1, FIH-1, MCM2, Sirtuin6, HSP90, CITED2, FBXW7, HSP90 beta, Elongin C, MDM2, AML1 (RUNX1)                                                                                                                 |
| Oxidative stress_Role of ASK1 under oxidative stress                                                                        | 55    | 1.87E-08 | 8.36E-06 | 15      | MAPK8/9, MEKK6(MAP3K6), PRKD1, JNK(MAPK8-10), JNK2(MAPK9), HIPK1, PP2A catalytic, SOD1, Gemin5, TRAF2, p38 MAPK, ASK1 (MAP3K5), Glutaredoxin, DAXX, 14-3-3                                                                                                                 |
| Immune response_Substance P-stimulated expression of proinflammatory cytokines via MAPKs                                    | 43    | 3.82E-07 | 8.97E-05 | 12      | GRO-2, MIP-1-beta, I-kB, G-protein beta/gamma, JNK(MAPK8-10), CCL13, CCL2, p38 MAPK, Substance P receptor, IKK-beta, c-Jun, TNF-alpha                                                                                                                                      |
| Immune response_IFN-alpha/beta signaling via MAPKs                                                                          | 77    | 3.91E-07 | 8.97E-05 | 16      | GCH1, TAP1 (PSF1), IRF9, JNK(MAPK8-10), HDAC1, PML, IP10, ISG15, p21, MEKK1(MAP3K1), Tyk2, p38                                                                                                                                                                             |
| Proteolysis_Putative SUMO-1 pathway                                                                                         | 29    | 4.02E-07 | 8.97E-05 | 10      | MAPK, ISG54, Oas12, c-Jun, RIG-G                                                                                                                                                                                                                                           |
| Attenuation of IFN type I signaling in melanoma cells                                                                       | 37    | 5.80E-07 | 1.11E-04 | 11      | SENP1, HSF1, RanGAP1, SAE2, PML, SP100, E2I, c-Jun, MDM2, DAXX                                                                                                                                                                                                             |
| Apoptosis and survival_Lymphotoxin-beta receptor signaling                                                                  | 42    | 2.35E-06 | 3.93E-04 | 11      | p38alpha (MAPK14), TAP1 (PSF1), IRF9, IP10, p21, MEKK1(MAP3K1), Tyk2, I-TAC, TAP, TAP2 (PSF2), c-Jun                                                                                                                                                                       |
| Apoptosis and survival_Role of PKR in stress-induced apoptosis                                                              | 53    | 4.33E-06 | 6.45E-04 | 12      | LTB, I-kB, JNK(MAPK8-10), Caspase-7, Cytochrome c, MEKK1(MAP3K1), TRAF2, ASK1 (MAP3K5), SDF-1, IKK-beta, c-Jun                                                                                                                                                             |
| Immune response_HSP60 and HSP70/TLR signaling pathway                                                                       | 54    | 5.34E-06 | 7.15E-04 | 12      | I-kB, PP2A regulatory, Caspase-7, C/EBP zeta, PP2A catalytic, p21, Tyk2, ATF-3, TRAF2, TARBP2, IKK-beta, TNF-alpha                                                                                                                                                         |
| Immune response_IFN-alpha/beta signaling via JAK/STAT                                                                       | 64    | 6.29E-06 | 7.66E-04 | 13      | I-kB, CD80, IRAK1/2, JNK(MAPK8-10), E2N(UBC13), UBE1, HSP60, UEV1A, p38 MAPK, IKK-beta, c-Jun, TNF-alpha                                                                                                                                                                   |
| Development_TNF-alpha, IL-1 alpha and WNT5A-dependent regulation of osteogenesis and adipogenesis in mesenchymal stem cells | 47    | 7.73E-06 | 8.62E-04 | 11      | CrkL, TAP1 (PSF1), IRF9, Caspase-7, PML, IP10, ISG15, p21, CCL2, Tyk2, I-TAC, ISG54, RIG-G                                                                                                                                                                                 |
| Cell cycle_Start of DNA replication in early S phase                                                                        | 32    | 1.05E-05 | 1.08E-03 | 9       | G-protein beta/gamma, TAZ, IRAK1/2, JNK(MAPK8-10), ROR2, HDAC3, TRAF2, IKK-beta, c-Jun, TNF-alpha, 14-3-3                                                                                                                                                                  |
| Apoptosis and survival_Granzyme B signaling                                                                                 | 33    | 1.38E-05 | 1.32E-03 | 9       | ASK (Dbf4), PP2A catalytic, CDC7, MCM2, Cdt1, HP1 alpha, Geminin, CDK2, CDC45L                                                                                                                                                                                             |
| Oxidative stress_ROS-mediated activation of MAPK via inhibition of phosphatases                                             | 34    | 1.80E-05 | 1.50E-03 | 9       | Rab-27A, Caspase-7, Tubulin alpha, MUNC13-4, Cytochrome c, Caspase-6, NOTCH1 (NEXT), FGFR1, Lamin B1                                                                                                                                                                       |
| Apoptosis and survival_Cytoplasmic/mitochondrial transport of proapoptotic proteins Bid, Bmf and Bim                        | 34    | 1.80E-05 | 1.50E-03 | 9       | MKP-7, PP2A regulatory, JNK(MAPK8-10), PP2A catalytic, SOD1, p38 MAPK, ASK1 (MAP3K5), VHR, PDGF-R-beta                                                                                                                                                                     |
| Development_Notch Signaling Pathway                                                                                         | 43    | 2.13E-05 | 1.59E-03 | 10      | GCKR(MAP4K5), Cytochrome c, MEKK1(MAP3K1), FLASH, TRAF2, Bim, ASK1 (MAP3K5), TNF-alpha, DAXX                                                                                                                                                                               |
| Apoptosis and survival_TNFR1 signaling pathway                                                                              | 43    | 2.13E-05 | 1.59E-03 | 10      | NOTCH1 (NICD), HDAC1, NOTCH1 receptor, TLE, NOTCH1 (NEXT), CIR, FBXW7, Histone H4, NOTCH1 precursor, GCN5                                                                                                                                                                  |
| Apoptosis and survival_FAS signaling cascades                                                                               | 44    | 2.64E-05 | 1.86E-03 | 10      | I-kB, JNK(MAPK8-10), Caspase-7, Cytochrome c, Caspase-6, MEKK1(MAP3K1), FLASH, TRAF2, c-Jun, TNF-alpha                                                                                                                                                                     |
| Mast cell migration in asthma                                                                                               | 73    | 2.81E-05 | 1.88E-03 | 13      | Lamin B, JNK(MAPK8-10), Caspase-7, Cytochrome c, Caspase-6, MEKK1(MAP3K1), FLASH, Bim, ASK1 (MAP3K5), DAXX                                                                                                                                                                 |
| Immune response_HMGB1/TLR signaling pathway                                                                                 | 36    | 2.97E-05 | 1.89E-03 | 9       | G-protein beta/gamma, CXCL16, CCR1, IP10, PDGF receptor, LTB2, CCL2, I-TAC, p38 MAPK, G-protein alpha-i family, SDF-1, FGFR1, TGF-beta receptor type I                                                                                                                     |
| Immune response_TNF-R2 signaling pathways                                                                                   | 45    | 3.26E-05 | 1.98E-03 | 10      | p38alpha (MAPK14), MIP-1-beta, I-kB, IRAK1/2, E2N(UBC13), UBE1, UEV1A, IKK-beta, TNF-alpha                                                                                                                                                                                 |
| Noise-induced hair cell death and spiral ganglion neuron degeneration                                                       | 96    | 3.50E-05 | 2.04E-03 | 15      | I-kB, AIP1 (DAB2ip), JNK(MAPK8-10), TRAF2, p38 MAPK, Bim, ASK1 (MAP3K5), IKK-beta, c-Jun, TNF-alpha                                                                                                                                                                        |
| Apoptosis and survival_Endoplasmic reticulum stress response pathway                                                        | 56    | 4.51E-05 | 2.51E-03 | 11      | p38alpha (MAPK14), AMPK gamma subunit, MIP-1-beta, JNK(MAPK8-10), TMC1, HDAC1, HDAC3, CCL13, Bak, Cytochrome c, CCL2, ERM proteins, AMPK beta subunit, RIPK3, TNF-alpha                                                                                                    |
| TNF-alpha-induced inflammatory signaling in normal and asthmatic airway epithelium                                          | 38    | 4.73E-05 | 2.51E-03 | 9       | p38alpha (MAPK14), I-kB, JNK(MAPK8-10), Caspase-7, C/EBP zeta, Bak, Cytochrome c, TRAF2, Bim, ASK1 (MAP3K5), c-Jun                                                                                                                                                         |
| Signal transduction_JNK pathway                                                                                             | 47    | 4.86E-05 | 2.51E-03 | 10      | I-kB, PP2A catalytic, IP10, MEKK1(MAP3K1), CCL2, p38 MAPK, IKK-beta, c-Jun, TNF-alpha                                                                                                                                                                                      |
| Transcription_ChREBP regulation pathway                                                                                     | 23    | 5.88E-05 | 2.82E-03 | 7       | HPK1(MAP4K1), MLK3(MAP3K11), JNK(MAPK8-10), GCKR(MAP4K5), MEKK1(MAP3K1), TRAF2, ASK1 (MAP3K5), c-Jun, TNF-alpha, DAXX                                                                                                                                                      |
| Regulation of degradation of deltaF508-CFTR in CF                                                                           | 39    | 5.89E-05 | 2.82E-03 | 9       | AMPK gamma subunit, G-protein beta/gamma, PKA-reg (cAMP-dependent), PP2A catalytic, AMPK beta subunit, G-protein alpha-i family, Acyl-CoA synthetase                                                                                                                       |
| Putative glucocorticoid- and LABA-mediated inhibition of pro-fibrotic signaling in airway fibroblasts/myofibroblasts        | 31    | 6.46E-05 | 2.98E-03 | 8       | UBE2J1, UBE2D1, UBE1, Hdj-2, HSP90, Csp, Sti1, E2I, DNAJB12                                                                                                                                                                                                                |

|                                                                                                              |     |          |          |    |                                                                                                                                                                                                                        |
|--------------------------------------------------------------------------------------------------------------|-----|----------|----------|----|------------------------------------------------------------------------------------------------------------------------------------------------------------------------------------------------------------------------|
| Transcription_Role of heterochromatin protein 1 (HP1) family in transcriptional silencing                    | 40  | 7.29E-05 | 3.26E-03 | 9  | Mi-2, HDAC1, MEF2, HP1 beta, HP1 alpha, E2I, HP1, Histone H4, Mi-2 alpha                                                                                                                                               |
| Oxidative stress_ROS-mediated MAPK activation via canonical pathways                                         | 60  | 8.77E-05 | 3.64E-03 | 11 | MLK3(MAP3K11), JNK(MAPK8-10), JNK2(MAPK9), MEKK1(MAP3K1), TRAF2, TSAD, p38 MAPK, ASK1                                                                                                                                  |
| Maturation and migration of dendritic cells in skin sensitization                                            | 41  | 8.96E-05 | 3.64E-03 | 9  | (MAP3K5), CaMK II alpha, FGFR1, PDGF-R-beta I-kB, CD80, JNK(MAPK8-10), MEKK1(MAP3K1), TRAF2, p38 MAPK, ASK1 (MAP3K5), c-Jun, TNF-alpha                                                                                 |
| Transcription_Sin3 and NuRD in transcription regulation                                                      | 41  | 8.96E-05 | 3.64E-03 | 9  | Mi-2, HDAC1, NRB54, SAP18, Mi-2 beta, MTA2, SAP130, Histone H4, Mi-2 alpha                                                                                                                                             |
| Development_Positive regulation of STK3/4 (Hippo) pathway and negative regulation of YAP/TAZ function        | 71  | 9.66E-05 | 3.81E-03 | 12 | GCGR, MOBKL1A, Mol1b, AMPK gamma subunit, TAZ, PKA-reg (cAMP-dependent), PP2A cat (alpha), RASSF1, AMPK beta subunit, RhoGDI alpha, LIF, 14-3-3                                                                        |
| Development_Beta-adrenergic receptors signaling via Cyclic AMP                                               | 51  | 1.02E-04 | 3.88E-03 | 10 | BETA-PIX, Phospholamban, PRKAR2A, PKA-reg type II (cAMP-dependent), PKA-reg (cAMP-dependent), PP2A                                                                                                                     |
| Signal transduction_Activin A signaling regulation                                                           | 33  | 1.05E-04 | 3.90E-03 | 8  | catalytic, PHK alpha (muscle), PDE4D, p38 MAPK, Perilipin ALK-4, Follistatin, FSRP, HDAC1, SMURF1, Histone H2, DLX1, Histone H4                                                                                        |
| Regulation of CFTR activity (normal and CF)                                                                  | 62  | 1.20E-04 | 4.33E-03 | 11 | Casein kinase II, beta chain (Phosvitin), PRKAR2A, PP2A regulatory, PKA-reg type II (cAMP-dependent), PKA-reg (cAMP-dependent), PP2C, PP2A catalytic, PDE4D, AMPK beta subunit, G-protein alpha-i family, VIL2 (ezrin) |
| Signal transduction_Erk Interactions: Inhibition of Erk                                                      | 34  | 1.31E-04 | 4.63E-03 | 8  | MKP-2, MKP-7, PKA-reg (cAMP-dependent), JNK(MAPK8-10), PP2A catalytic, MKP-4, GMF, VHR                                                                                                                                 |
| Signal transduction_CXCR4 signaling via MAPKs cascades                                                       | 53  | 1.42E-04 | 4.89E-03 | 10 | Cortactin, G-protein beta/gamma, JNK(MAPK8-10), PAK, MEKK1(MAP3K1), p38 MAPK, G-protein alpha-i family, SDF-1, c-Jun, Beta-arrestin2                                                                                   |
| Immune response_Antigen presentation by MHC class I, classical pathway                                       | 54  | 1.68E-04 | 5.61E-03 | 10 | PSMB5, MHC Class I alpha chain, TAP1 (PSF1), HSP90 alpha, Bleomycin hydrolase, Sec24, PC7, PSMB10, TAP, TAP2 (PSF2)                                                                                                    |
| Immune response_Antigen presentation by MHC class I: cross-presentation                                      | 99  | 1.91E-04 | 6.24E-03 | 14 | Rab-6, Rab-27A, HSP90 alpha, Adipophilin, HSP60, Fc gamma RII alpha, HSP90, Syntaxin 4, Rab8B, TAP, OLR1, Rab-34, IKK-beta, Connexin 43                                                                                |
| Development_Keratinocyte differentiation                                                                     | 56  | 2.29E-04 | 7.31E-03 | 10 | NOTCH1 (NICD), MAD, p38alpha (MAPK14), p21, Fra-1, MEKK1(MAP3K1), TGM1, ASK1 (MAP3K5), c-Jun, TGF-beta receptor type I                                                                                                 |
| Immune response_Role of PKR in stress-induced antiviral cell response                                        | 57  | 2.67E-04 | 8.30E-03 | 10 | p38alpha (MAPK14), I-kB, JNK(MAPK8-10), Caspase-7, Tyk2, TRAF2, TARBP2, IKK-beta, c-Jun, TNF-alpha                                                                                                                     |
| CHDI_Correlations from Replication data_Causal network (positive correlations)                               | 79  | 2.75E-04 | 8.38E-03 | 12 | I-kB, G-protein beta/gamma, CD80, IRAK1/2, JNK(MAPK8-10), MEF2, p38 MAPK, SDF-1, IKK-beta, c-Jun, RhoGDI alpha, VIL2 (ezrin)                                                                                           |
| Immune response_CD137 signaling in immune cell                                                               | 29  | 2.93E-04 | 8.48E-03 | 7  | CD137(TNFRSF9), MEKK1(MAP3K1), TRAF2, p38 MAPK, Bim, ASK1 (MAP3K5), c-Jun                                                                                                                                              |
| Putative pathways of MHC class I-dependent postsynaptic long-term depression in major depressive disorder    | 21  | 2.98E-04 | 8.48E-03 | 6  | MHC Class I alpha chain, TAP1 (PSF1), HLA-B, TAP, TAP2 (PSF2), TNF-alpha                                                                                                                                               |
| Possible regulation of HSF-1/chaperone pathway in Huntington's disease                                       | 21  | 2.98E-04 | 8.48E-03 | 6  | HSF1, HSP90 alpha, JNK(MAPK8-10), HSP90, E2I, HSP90 beta                                                                                                                                                               |
| Cytoskeleton remodeling_Regulation of actin cytoskeleton organization by the kinase effectors of Rho GTPases | 58  | 3.09E-04 | 8.62E-03 | 10 | BETA-PIX, MLCP (reg), Cortactin, Alpha-actinin, PAK, ERM proteins, PIP5KI, MLCK, SLC9A1, RhoGDI alpha                                                                                                                  |
| Common mechanisms of Th17 cell migration                                                                     | 48  | 3.21E-04 | 8.76E-03 | 9  | MIP-1-beta, G-protein beta/gamma, MCAM, CXCL16, IP10, CCL2, I-TAC, G-protein alpha-i family, CCL7                                                                                                                      |
| Neurogenesis_NGF/ TrkA MAPK-mediated signaling                                                               | 105 | 3.57E-04 | 9.52E-03 | 14 | CrkL, SHPS-1, PLAUR (uPAR), PP2A regulatory, PKA-reg (cAMP-dependent), CDK5, PP2A catalytic, p21, RGS2, Fra-1, p38 MAPK, Ephrin-A receptor 2, SH2B, c-Jun                                                              |
| Cooperative action of IFN-gamma and TNF-alpha on astrocytes in multiple sclerosis                            | 39  | 3.63E-04 | 9.52E-03 | 8  | CIITA, I-kB, CD80, PKA-reg (cAMP-dependent), IP10, CCL2, IKK-beta, TNF-alpha                                                                                                                                           |
| Cigarette smoke-induced oxidative stress and apoptosis in airway epithelial cells                            | 60  | 4.11E-04 | 1.06E-02 | 10 | JNK(MAPK8-10), JNK2(MAPK9), C/EBP zeta, SOD1, p21, Cytochrome c, p38 MAPK, ASK1 (MAP3K5), Glutaredoxin, c-Jun                                                                                                          |
| The role of UV radiation in melanoma development                                                             | 40  | 4.35E-04 | 1.10E-02 | 8  | JNK(MAPK8-10), p21, MEKK1(MAP3K1), TRAF2, p38 MAPK, ASK1 (MAP3K5), c-Jun, TNF-alpha                                                                                                                                    |
| NETosis in SLE                                                                                               | 31  | 4.56E-04 | 1.13E-02 | 7  | HP1 beta, Fc gamma RII alpha, Histone H2A, p38 MAPK, Histone H1.2, Histone H4                                                                                                                                          |
| Glucocorticoid-induced elevation of intraocular pressure as glaucoma risk factor                             | 62  | 5.39E-04 | 1.27E-02 | 10 | SENPI, Alpha-actinin, ROR2, C/EBP zeta, CLIM1, PLAT (TPA), Antileukoproteinase 1, MLCK, FGFR1, RhoGDI alpha                                                                                                            |
| Development_WNT/Beta-catenin signaling in the nucleus                                                        | 62  | 5.39E-04 | 1.27E-02 | 10 | MED12, JNK(MAPK8-10), HDAC1, MEF2, TLE, RUNX, p38 MAPK, c-Jun, BRG1, GCN5                                                                                                                                              |
| Cytoskeleton remodeling_Reverse signaling by Ephrin-B                                                        | 32  | 5.60E-04 | 1.27E-02 | 7  | G-protein beta/gamma, Tubulin alpha, RGS3, Ephrin-B, G-protein alpha-i family, SDF-1, WIRE                                                                                                                             |
| DNA damage_ATM/ATR regulation of G1/S checkpoint                                                             | 32  | 5.60E-04 | 1.27E-02 | 7  | I-kB, NFB1, p21, BLM, RAD9, MDM2, CDK2                                                                                                                                                                                 |
| Apoptosis and survival_IL-17-induced CIKS-dependent MAPK signaling pathways                                  | 32  | 5.60E-04 | 1.27E-02 | 7  | JNK(MAPK8-10), E2N(UBC13), UBE1, UEV1A, TRAF2, p38 MAPK, IKK-beta                                                                                                                                                      |
| Normal and pathological TGF-beta-mediated regulation of cell proliferation                                   | 33  | 6.83E-04 | 1.48E-02 | 7  | MLK3(MAP3K11), JNK(MAPK8-10), PDGF receptor, DDX5, p38 MAPK, TGF-beta receptor type I, PDGF-R-beta                                                                                                                     |
| TLRs-mediated IFN-alpha production by plasmacytoid dendritic cells in SLE                                    | 53  | 6.89E-04 | 1.48E-02 | 9  | IRAK2, CDC37, U1-70K, Fc gamma RII alpha, SNRPD1 (SMD1), Ro60, A20, Sec24C, IKK-beta                                                                                                                                   |
| Immune response_Induction of the antigen presentation machinery by IFN-gamma                                 | 53  | 6.89E-04 | 1.48E-02 | 9  | CIITA, TAP1 (PSF1), HLA-F, PRMT5, HLA-B, WDR5, ASH2L, PSMB10, TAP2 (PSF2)                                                                                                                                              |
| MAPK-independent proliferation of normal and asthmatic smooth muscle                                         | 64  | 6.98E-04 | 1.48E-02 | 10 | I-kB, G-protein beta/gamma, p21, PDGF receptor, PLAT (TPA), G-protein alpha-i family, IKK-beta, FGFR1, TGF-beta receptor type I, PDGF-R-beta                                                                           |

cells

|                                                                                                                                               |    |          |          |    |                                                                                                                                |
|-----------------------------------------------------------------------------------------------------------------------------------------------|----|----------|----------|----|--------------------------------------------------------------------------------------------------------------------------------|
| Apoptosis and survival_TNF-alpha-induced Caspase-8 signaling                                                                                  | 43 | 7.25E-04 | 1.52E-02 | 8  | HSP90 alpha, PP2A regulatory, Caspase-7, PP2A catalytic, HSP90, Cytochrome c, Caspase-6, TNF-alpha                             |
| Immune response_CD40 signaling                                                                                                                | 65 | 7.91E-04 | 1.61E-02 | 10 | I-kB, CD80, JNK2(MAPK9), MEKK1(MAP3K1), CCL2, TRAF2, A20, p38 MAPK, IKK-beta, c-Jun                                            |
| TNF-alpha and IL-1 beta-mediated regulation of contraction and secretion of inflammatory factors in normal and asthmatic airway smooth muscle | 65 | 7.91E-04 | 1.61E-02 | 10 | GRO-2, p38alpha (MAPK14), JNK(MAPK8-10), CCL2, p38 MAPK, Histone H4, c-Jun, PDGF-R-beta, CCL7, TNF-alpha                       |
| DNA damage_Role of SUMO in p53 regulation                                                                                                     | 17 | 8.39E-04 | 1.68E-02 | 5  | SAE2, PML, E2f1, MDM2, DAXX                                                                                                    |
| Role of CD8+ Tc1 cells in COPD                                                                                                                | 44 | 8.51E-04 | 1.68E-02 | 8  | CXCL16, IP10, CCL2, KLRK1 (NKG2D), Tyk2, Antileukoproteinase 1, c-Jun, TNF-alpha                                               |
| Tau pathology in Alzheimer disease                                                                                                            | 55 | 9.10E-04 | 1.77E-02 | 9  | p38alpha (MAPK14), JNK(MAPK8-10), Caspase-7, CDK5, PP2C, PP2A catalytic, Caspase-6, Agrin, p38 MAPK                            |
| Development_Transcriptional regulation of megakaryopoiesis                                                                                    | 35 | 9.92E-04 | 1.90E-02 | 7  | NOTCH1 receptor, Fc gamma RII alpha, ETS, ETS1, THAS, AML1 (RUNX1), LMO2                                                       |
| B-regulatory cells and tumor cells intercellular interaction                                                                                  | 67 | 1.01E-03 | 1.90E-02 | 10 | LTB, CD80, MCAM, JNK(MAPK8-10), EBI3, CCL2, p38 MAPK, TGF-beta receptor type I, PD-L1, TNF-alpha                               |
| Neurophysiological process_Dopamine D2 receptor transactivation of PDGFR in CNS                                                               | 26 | 1.04E-03 | 1.90E-02 | 6  | G-protein beta/gamma, PP2A regulatory, PP2A catalytic, PDGF receptor, G-protein alpha-i family, PDGF-R-beta                    |
| Development_NOTCH1-mediated pathway for NF-KB activity modulation                                                                             | 26 | 1.04E-03 | 1.90E-02 | 6  | NOTCH1 (NICD), HDAC1, NOTCH1 receptor, NOTCH1 (NEXT), CIR, Histone H4                                                          |
| Transport_RAN regulation pathway                                                                                                              | 18 | 1.12E-03 | 2.02E-02 | 5  | NUP54, Importin (karyopherin)-alpha, RanGAP1, E2f1, RanBP1                                                                     |
| TTP metabolism                                                                                                                                | 68 | 1.13E-03 | 2.02E-02 | 10 | XRN2, PD-ECGF (Tdrpase), POLA2, UDP, NDPK A, POLE3 (YBL1), POLG cat, NDPK 6, POLD reg (p68), NDPK D (mitochondrial)            |
| Role of GIP in pathogenesis of type 2 diabetes                                                                                                | 46 | 1.15E-03 | 2.03E-02 | 8  | p38alpha (MAPK14), PKA-reg (cAMP-dependent), JNK(MAPK8-10), PP2A catalytic, Cytochrome c, TORC2, p38 MAPK, ASK1 (MAP3K5)       |
| Cigarette smoke components TCDD and Benzo[a]pyrene and receptor AHR signaling in lung epithelial cells                                        | 36 | 1.18E-03 | 2.03E-02 | 7  | ARNT, TGIF, HDAC1, CYP1B1, CCL2, TGF-beta receptor type I, TNF-alpha                                                           |
| Signal transduction_Angiotensin II signaling via Beta-arrestin                                                                                | 57 | 1.19E-03 | 2.03E-02 | 9  | Casein kinase II, beta chain (Phosvitin), MLCP (reg), STAR, PP2A catalytic, MYLK1, ASK1 (MAP3K5), MLCK, Beta-arrestin2, 14-3-3 |
| HCV-dependent regulation of membrane receptors signaling in HCC                                                                               | 27 | 1.28E-03 | 2.17E-02 | 6  | LTB, I-kB, TRAF2, IKK-beta, c-Jun, TNF-alpha                                                                                   |
| Development_Hedgehog signaling                                                                                                                | 47 | 1.34E-03 | 2.20E-02 | 8  | Casein kinase I, SPOP, CDC37, HSP90, SAP18, CDK11, DYRK2, Beta-arrestin2                                                       |
| Immune response_TLR5, TLR7, TLR8 and TLR9 signaling pathways                                                                                  | 58 | 1.35E-03 | 2.20E-02 | 9  | IRAK2, I-kB, JNK(MAPK8-10), E2N(UBC13), UEV1A, p38 MAPK, IKK-beta, c-Jun, TNF-alpha                                            |
| Immune response_IL-33 signaling pathway                                                                                                       | 58 | 1.35E-03 | 2.20E-02 | 9  | p38alpha (MAPK14), I-kB, JNK(MAPK8-10), CCL2, Histone H2A, Histone H2B, IKK-beta, c-Jun, TNF-alpha                             |
| G-protein signaling_Regulation of p38 and JNK signaling mediated by G-proteins                                                                | 37 | 1.40E-03 | 2.23E-02 | 7  | G-protein beta/gamma, JNK(MAPK8-10), MEKK1(MAP3K1), p38 MAPK, G-protein alpha-i family, c-Jun, ARHGEF1 (p115RhoGEF)            |
| Immune response_Oncostatin M signaling via MAPK                                                                                               | 37 | 1.40E-03 | 2.23E-02 | 7  | JNK(MAPK8-10), MEKK1(MAP3K1), CCL2, p38 MAPK, c-Jun, TIMP1, LIFR                                                               |
| Stellate cells activation and liver fibrosis                                                                                                  | 70 | 1.42E-03 | 2.24E-02 | 10 | GRO-2, I-kB, IRAK1/2, PDGF receptor, CCL2, TRAF2, TIMP1, TGF-beta receptor type I, PDGF-R-beta, TNF-alpha                      |
| K-RAS signaling in lung cancer                                                                                                                | 48 | 1.54E-03 | 2.38E-02 | 8  | GRO-2, MIP-1-beta, JNK(MAPK8-10), BTG2, SPRY2, MEKK1(MAP3K1), CCL2, c-Jun                                                      |
| Apoptosis and survival_IL-17-induced CIKS- dependent NF-kB signaling and mRNA stabilization                                                   | 28 | 1.56E-03 | 2.38E-02 | 6  | I-kB, E2N(UBC13), UBE1, UEV1A, TRAF2, IKK-beta                                                                                 |
| DNA damage_ATM / ATR regulation of G2 / M checkpoint                                                                                          | 28 | 1.56E-03 | 2.38E-02 | 6  | p38alpha (MAPK14), PLK3 (CNK), NFB1, p21, BLM, RAD9                                                                            |
| Neutrophil chemotaxis in asthma                                                                                                               | 38 | 1.65E-03 | 2.48E-02 | 7  | GRO-2, G-protein beta/gamma, CCR1, CCL2, G-protein alpha-i family, Substance P receptor, CCL7                                  |
| Transcription_N-CoR/ SMRT complex-mediated epigenetic gene silencing                                                                          | 49 | 1.77E-03 | 2.57E-02 | 8  | REV-ERBalpha, UBE2D1, HDAC3, BAF47, Histone H2B, Histone H4, c-Jun, BRG1                                                       |
| PDE4 regulation of cyto/chemokine expression in arthritis                                                                                     | 49 | 1.77E-03 | 2.57E-02 | 8  | MIP-1-beta, I-kB, PKA-reg (cAMP-dependent), cAMP-GEFI, IP10, CCL2, PDE4, TNF-alpha                                             |
| Signal transduction_Soluble CXCL16 signaling                                                                                                  | 49 | 1.77E-03 | 2.57E-02 | 8  | I-kB, G-protein beta/gamma, JNK(MAPK8-10), CXCL16, p38 MAPK, G-protein alpha-i family, IKK-beta, TNF-alpha                     |
| Regulation of degradation of wtCFTR                                                                                                           | 20 | 1.87E-03 | 2.61E-02 | 5  | UBE2J1, UBE2D1, UBE1, HSP90, Csp                                                                                               |
| Abnormalities in cell cycle in SCLC                                                                                                           | 29 | 1.90E-03 | 2.61E-02 | 6  | Max, CKS1, Miz-1, p21, MDM2, CDK2                                                                                              |
| Histone deacetylases in Prostate Cancer                                                                                                       | 29 | 1.90E-03 | 2.61E-02 | 6  | HDAC1, HDAC3, Tubulin alpha, Sirtuin6, p21, HSP90                                                                              |
| Apoptosis and survival_p53-dependent apoptosis                                                                                                | 29 | 1.90E-03 | 2.61E-02 | 6  | p38alpha (MAPK14), JNK(MAPK8-10), Bim, RAD9, c-Jun, MDM2                                                                       |
| Transcription_p53 signaling pathway                                                                                                           | 39 | 1.93E-03 | 2.61E-02 | 7  | MKP-7, JNK(MAPK8-10), p21, MEKK1(MAP3K1), MTA2, MDM2, CDK2                                                                     |
| Apoptosis and survival_APRIL and BAFF signaling                                                                                               | 39 | 1.93E-03 | 2.61E-02 | 7  | MIP-1-beta, I-kB, JNK(MAPK8-10), MEKK1(MAP3K1), TRAF2, IKK-beta, CAML                                                          |
| Apoptosis and survival_Ubiquitination and phosphorylation in TNF-alpha-induced NF-kB signaling                                                | 39 | 1.93E-03 | 2.61E-02 | 7  | UBE2D1, E2N(UBC13), UEV1A, TRAF2, Casein kinase I alpha, IKK-beta, TNF-alpha                                                   |
| Transport_The role of AVP in regulation of Aquaporin 2 and renal water reabsorption                                                           | 50 | 2.02E-03 | 2.65E-02 | 8  | p38alpha (MAPK14), PRKAR2A, PKA-reg type II (cAMP-dependent), PKA-reg (cAMP-dependent), SPA1, cAMP-GEFI, Syntaxin 4, MLCK      |

|                                                                                                        |     |          |          |    |                                                                                                                                                                                    |
|--------------------------------------------------------------------------------------------------------|-----|----------|----------|----|------------------------------------------------------------------------------------------------------------------------------------------------------------------------------------|
| Apoptosis and survival_HTR1A signaling                                                                 | 50  | 2.02E-03 | 2.65E-02 | 8  | I-kB, G-protein beta/gamma, PP2A regulatory, PKA-reg (cAMP-dependent), PP2A catalytic, Cytochrome c, G-protein alpha-i family, SLC9A1                                              |
| PDE4 regulation of cyto/chemokine expression in inflammatory skin diseases                             | 50  | 2.02E-03 | 2.65E-02 | 8  | PKA-reg (cAMP-dependent), IP10, CCL2, PDE4, p38 MAPK, G-protein alpha-i family, TNF-alpha, 14-3-3                                                                                  |
| dCTP/dUTP metabolism                                                                                   | 74  | 2.18E-03 | 2.80E-02 | 10 | XRN2, PD-ECGF (TdRPase), POLA2, AK2, NDPK A, POLE3 (YBL1), POLG cat, NDPK 6, POLD reg (p68), NDPK D (mitochondrial)                                                                |
| G-protein signaling_Rap1A regulation pathway                                                           | 40  | 2.25E-03 | 2.80E-02 | 7  | CrkL, MAGI-1(BAIAP1), SPA1, CALDAG-GEFI, cAMP-GEFI, Rap1GDS1, G-protein alpha-i family                                                                                             |
| Stem cells_Pancreatic cancer stem cells in tumor metastasis                                            | 40  | 2.25E-03 | 2.80E-02 | 7  | MLCP (reg), G-protein beta/gamma, CD133, G-protein alpha-i family, SDF-1, MLCK, ARHGGEF1 (p115RhoGEF)                                                                              |
| Recurrent gene fusions in Prostate Cancer                                                              | 40  | 2.25E-03 | 2.80E-02 | 7  | C19orf25, MgDP1, USP10, MIPOL1, MRPS10, hnRNP A2, DDX5                                                                                                                             |
| Stem cells_Neovascularization of glioblastoma in response to hypoxia                                   | 30  | 2.28E-03 | 2.80E-02 | 6  | ARNT, I-kB, HIF-prolyl hydroxylase, CD133, SDF-1, IKK-beta                                                                                                                         |
| Apoptosis and survival_Granzyme A signaling                                                            | 30  | 2.28E-03 | 2.80E-02 | 6  | PHAP1 (pp32), Rab-27A, MUNC13-4, NDPK A, Histone H2B, Lamin B1                                                                                                                     |
| Immune response_IFN-gamma signaling via MAPK                                                           | 51  | 2.30E-03 | 2.80E-02 | 8  | MLK3(MAP3K11), IRF9, IP10, SP100, MEKK1(MAP3K1), p38 MAPK, c-Jun, TNF-alpha                                                                                                        |
| Epithelial cell anoikis in COPD                                                                        | 51  | 2.30E-03 | 2.80E-02 | 8  | Alpha-actinin, JNK(MAPK8-10), Beta-parvin, Bak, Laminin 11, p38 MAPK, Bim, ASK1 (MAP3K5)                                                                                           |
| Apoptosis and survival_CXCR3-B signaling                                                               | 63  | 2.43E-03 | 2.88E-02 | 9  | G-protein beta/gamma, PKA-reg (cAMP-dependent), IP10, p21, Cytochrome c, I-TAC, NRF2, p38 MAPK, Beta-arrestin2                                                                     |
| Neuroprotective action of lithium                                                                      | 63  | 2.43E-03 | 2.88E-02 | 9  | p38alpha (MAPK14), HSF1, CDK5, JNK2(MAPK9), FRAT1, p38 MAPK, Bim, ASK1 (MAP3K5), c-Jun                                                                                             |
| Vascular endothelial cell damage in SLE                                                                | 63  | 2.43E-03 | 2.88E-02 | 9  | JNK(MAPK8-10), Caspase-7, CCL2, TRAF2, p38 MAPK, PD-L1, AML1 (RUNX1), TNF-alpha, VEGF-B                                                                                            |
| Signaling Transduction_Role of MIF as an intracellular mediator                                        | 41  | 2.60E-03 | 3.01E-02 | 7  | JNK(MAPK8-10), HDAC1, HDAC3, p21, Bim, c-Jun, MDM2                                                                                                                                 |
| Development_Muscle progenitor cell migration in hypaxial myogenesis                                    | 41  | 2.60E-03 | 3.01E-02 | 7  | NOTCH1 (NICD), G-protein beta/gamma, NOTCH1 receptor, NOTCH1 (NEXT), G-protein alpha-i family, SDF-1, FGFR1                                                                        |
| Immune response_Lysophosphatidic acid signaling via NF-kB                                              | 52  | 2.61E-03 | 3.01E-02 | 8  | PKD, JNK(MAPK8-10), Caspase-7, CCL2, A20, p38 MAPK, IKK-beta, Beta-arrestin2                                                                                                       |
| dGTP metabolism                                                                                        | 64  | 2.72E-03 | 3.10E-02 | 9  | XRN2, POLA2, NDPK A, POLE3 (YBL1), POLG cat, NDPK 6, POLD reg (p68), PPAL, NDPK D (mitochondrial)                                                                                  |
| Chemotaxis_Lysophosphatidic acid signaling via GPCRs                                                   | 129 | 2.73E-03 | 3.10E-02 | 14 | MLCP (reg), G-protein beta/gamma, Rho GTPase, PRKD1, TAZ, JNK(MAPK8-10), Caspase-7, PAK, p21, p38 MAPK, G-protein alpha-i family, c-Jun, G-protein gamma 12, ARHGGEF1 (p115RhoGEF) |
| Inhibition of RUNX3 signaling in gastric cancer                                                        | 22  | 2.94E-03 | 3.26E-02 | 5  | Caspase-7, HDAC1, p21, Bim, TIMP1                                                                                                                                                  |
| Immune response_HMGB1/RAGE signaling pathway                                                           | 53  | 2.95E-03 | 3.26E-02 | 8  | MIP-1-beta, I-kB, MEF2A, JNK(MAPK8-10), PLAT (TPA), p38 MAPK, c-Jun, TNF-alpha                                                                                                     |
| Chemotaxis_CCR1 signaling                                                                              | 53  | 2.95E-03 | 3.26E-02 | 8  | I-kB, G-protein beta/gamma, CCR1, CCL13, p38 MAPK, G-protein alpha-i family, IKK-beta, CCL7                                                                                        |
| IL-1 signaling in melanoma                                                                             | 42  | 3.00E-03 | 3.27E-02 | 7  | GRO-2, I-kB, JNK(MAPK8-10), p21, CCL2, c-Jun, PD-L1                                                                                                                                |
| TNF-alpha, IL-1 beta induce dyslipidemia and inflammation in obesity and type 2 diabetes in adipocytes | 42  | 3.00E-03 | 3.27E-02 | 7  | PTX3, PKA-reg (cAMP-dependent), CCL2, TRAF2, IKK-beta, Perilipin, TNF-alpha                                                                                                        |
| Immune response_BAFF-induced non-canonical NF-kB signaling                                             | 32  | 3.21E-03 | 3.47E-02 | 6  | UBE1C, E2N(UBC13), UBE1, UEV1A, TRAF2, E2I                                                                                                                                         |
| GTP metabolism                                                                                         | 54  | 3.32E-03 | 3.56E-02 | 8  | ITPA, Guanylate cyclase A (NPR1), NDPK A, PDE6G, Guanylate cyclase C (GC-C), NDPK 6, PDE6H, NDPK D (mitochondrial)                                                                 |
| Signal transduction_PDGF signaling via JAK-STAT and reactive oxygen species (ROS)                      | 66  | 3.37E-03 | 3.58E-02 | 9  | PKA-reg (cAMP-dependent), IP10, CCL13, PDGF receptor, CCL2, Tyk2, I-TAC, PDGF-R-beta, CCL7                                                                                         |
| Proteolysis_Putative ubiquitin pathway                                                                 | 23  | 3.62E-03 | 3.78E-02 | 5  | UBE2D1, E2N(UBC13), UBE1, UEV1A, FBXW7                                                                                                                                             |
| Development_Thrombopoietin signaling via JAK-STAT pathway                                              | 23  | 3.62E-03 | 3.78E-02 | 5  | CrkL, TAP1 (PSF1), CISH, p21, Tyk2                                                                                                                                                 |
| Immune response_Platelet activating factor/ PTAFR pathway signaling                                    | 55  | 3.73E-03 | 3.84E-02 | 8  | G-protein beta/gamma, PKA-reg (cAMP-dependent), CCL2, Tyk2, p38 MAPK, ASK1 (MAP3K5), G-protein alpha-i family, Beta-arrestin2                                                      |
| Immune response_CD28 signaling                                                                         | 55  | 3.73E-03 | 3.84E-02 | 8  | I-kB, CD80, JNK(MAPK8-10), MEKK1(MAP3K1), PIP5KI, p38 MAPK, IKK-beta, c-Jun                                                                                                        |
| Immune response_Gastrin in inflammatory response                                                       | 68  | 4.13E-03 | 4.22E-02 | 9  | ELAVL1 (HuR), GRO-2, p38alpha (MAPK14), I-kB, JNK(MAPK8-10), MEF2, MEKK1(MAP3K1), IKK-beta, c-Jun                                                                                  |
| MAPK-mediated proliferation of normal and asthmatic smooth muscle cells                                | 56  | 4.18E-03 | 4.24E-02 | 8  | p38alpha (MAPK14), G-protein beta/gamma, PDGF receptor, PLAT (TPA), G-protein alpha-i family, FGFR1, TGF-beta receptor type I, PDGF-R-beta                                         |
| dATP/dITP metabolism                                                                                   | 94  | 4.24E-03 | 4.27E-02 | 11 | XRN2, ITPA, POLA2, AK2, NDPK A, POLE3 (YBL1), POLG cat, NDPK 6, POLD reg (p68), PPAL, NDPK D (mitochondrial)                                                                       |
| CFTR folding and maturation (normal and CF)                                                            | 24  | 4.40E-03 | 4.37E-02 | 5  | HSP90 alpha, Hdj-2, Csp, Sti1, HSP90 beta                                                                                                                                          |
| G-protein signaling_RhoA regulation pathway                                                            | 34  | 4.41E-03 | 4.37E-02 | 6  | Ephrin-A receptors, Rap1GDS1, GRAF, RhoGDI alpha, ARHGGEF1 (p115RhoGEF), VIL2 (ezrin)                                                                                              |
| Signal transduction_Angiotensin II/ AGTR1 signaling via JAK/STAT                                       | 45  | 4.48E-03 | 4.41E-02 | 7  | I-kB, p21, RGS2, Tyk2, BNP, c-Jun, TIMP1                                                                                                                                           |
| Immune response_TLR2 and TLR4 signaling pathways                                                       | 69  | 4.56E-03 | 4.45E-02 | 9  | IRAK2, I-kB, JNK(MAPK8-10), E2N(UBC13), UEV1A, p38 MAPK, IKK-beta, c-Jun, TNF-alpha                                                                                                |
| Immune response_IL-1 signaling pathway                                                                 | 82  | 4.67E-03 | 4.47E-02 | 10 | p38alpha (MAPK14), I-kB, JNK(MAPK8-10), MCPIP, IP10, MEKK1(MAP3K1), CCL2, MYLK1, CCL7, TNF-alpha                                                                                   |

|                                                                          |    |          |          |    |                                                                                                                                                        |
|--------------------------------------------------------------------------|----|----------|----------|----|--------------------------------------------------------------------------------------------------------------------------------------------------------|
| Skeletal muscle atrophy in COPD                                          | 57 | 4.67E-03 | 4.47E-02 | 8  | ALK-4, ELAVL1 (HuR), p38alpha (MAPK14), I-kB, p38 MAPK, TGF-beta receptor type I, TNF-alpha, 14-3-3                                                    |
| Transcription_Epigenetic regulation of gene expression                   | 57 | 4.67E-03 | 4.47E-02 | 8  | PRMT5, HDAC1, HDAC3, Sirtuin6, Histone H2A, Histone H2B, Histone H4, GCN5                                                                              |
| Apoptosis and survival_IL-17-induced CIKS-independent signaling pathways | 46 | 5.07E-03 | 4.82E-02 | 7  | p38alpha (MAPK14), JNK(MAPK8-10), c-Jun/Fra-1, Fra-1, Tyk2, p38 MAPK, c-Jun                                                                            |
| Altered Ca2+ handling in heart failure                                   | 35 | 5.11E-03 | 4.82E-02 | 6  | BIN1 (Amphiphysin II), Phospholamban, G-protein beta/gamma, PP2A catalytic, PDE4D, G-protein alpha-i family                                            |
| TGF-beta signaling via kinase cascades in breast cancer                  | 58 | 5.20E-03 | 4.82E-02 | 8  | p38alpha (MAPK14), MLK3(MAP3K11), JNK(MAPK8-10), p38 MAPK, IKK-beta, c-Jun, TGF-beta receptor type I, TNF- alpha                                       |
| Apoptosis and survival_Role of nuclear PI3K in NGF/ TrkA signaling       | 25 | 5.29E-03 | 4.82E-02 | 5  | Nucleolin, Bim, Zyxin, Ebp1, Acinus                                                                                                                    |
| Cytoskeleton remodeling_Neurofilaments                                   | 25 | 5.29E-03 | 4.82E-02 | 5  | Tubulin gamma, DCTN2, CDK5, Tubulin alpha, Tubulin gamma 1                                                                                             |
| HSP70 and HSP40-dependent folding in Huntington's disease                | 25 | 5.29E-03 | 4.82E-02 | 5  | HSP90 alpha, Hdj-2, HSP90, Sti1, HSP90 beta                                                                                                            |
| Inhibition of TGF-beta signaling in gastric cancer                       | 25 | 5.29E-03 | 4.82E-02 | 5  | Praja-1, HDAC1, p21, Bim, TGF-beta receptor type I                                                                                                     |
| Cytoskeleton remodeling_Substance P mediated membrane blebbing           | 16 | 5.43E-03 | 4.91E-02 | 4  | MLCP (reg), Tubulin alpha, Substance P receptor, MLCK                                                                                                  |
| Blood coagulation_GPCRs in platelet aggregation                          | 71 | 5.52E-03 | 4.95E-02 | 9  | MLCP (reg), G-protein beta/gamma, PKA-reg (cAMP- dependent), CALDAG-GEFI, Syntaxin 4, RAP-1B, G-protein alpha-i family, Calmyrin, ARHGEF1 (p115RhoGEF) |
| SLE genetic marker-specific pathways in antigen-presenting cells (APC)   | 84 | 5.54E-03 | 4.95E-02 | 10 | I-kB, TNIP1, IRF9, Fc gamma RII alpha, KLRK1 (NKG2D), Tyk2, TRAF2, A20, IKK-beta, TNF-alpha                                                            |

# Items with FDR < 0.05 were considered as significant ones.
